# Supplementary material
Source: MDPI journal article supplement (https://www.mdpi.com/2076-3263/12/3/114)
Supplement: s1 [file s1]

Archive with 2 entries (2 files):
- Supplementary Material S1.xlsx
- Supplementary Material S2.pdf
