# Supplementary material
Source: MDPI journal article supplement (https://www.mdpi.com/2076-3263/12/3/114)
Supplement: s1 [file s1 › Supplementary Material S1.xlsx]

## Sheet: Legend
		Supplementary material S1 for the following article:
		Zircon from altered monzonite rocks provides insights into magmatic and mineralizing processes at the Douay Au project, Abitibi greenstone belt
		by L. Mathieu, T. Wasuita, R. Sherlock, F. Speidel, J. Marsh, B. Dubé, O. Côté-Mantha
		Journal: MDPI - Minerals
		Tables
		S1	Table S1: Whole rock chemical analyses
		S2	Table S2: Chemical composition of zircon grains from sample D1A
		S3	Table S3: Chemical composition of zircon grains from sample D3
		S4	Table S4: Data processing and analytical parameters
		Reference
			Bell, E. A., 2016. Preservation of primary mineral inclusions and secondary mineralization in igneous zircon: a case study in orthogneiss from the Blue Ridge, Virginia. Contributions to Mineralogy and Petrology, 171(3), 26.
			Borisov, A., Aranovich, L., 2019. Zircon solubility in silicate melts: New experiments and probability of zircon crystallization in deeply evolved basic melts. Chemical Geology, 510, 103–112.
			Hayden, L.A., Watson, E.B., 2007. Rutile saturation in hydrous siliceous melts and its bearing on Ti-thermometry of quartz and zircon. Earth Planet. Sci. Lett. 258, 561–568.
			Loucks, R.R., Fiorentini, M.L., Henriquez, G.J., 2020. New magmatic oxybarometer using trace elements in zircon. J. Petrol.
			Smythe, D.J., Brenan, J.M., 2016. Magmatic oxygen fugacity estimated using zircon-melt partitioning of cerium. Earth Planet. Sci. Lett. 453, 260–266.
			Watson, E.B., Harrison, T.M., 1983. Zircon saturation revisited: temperature and composition effects in a variety of crustal magma types. Earth Planet. Sci. Lett. 64, 295–304.

## Sheet: S1
	Table S1: Whole rock chemical analyses
	Sample No.	Sample tag	UTME 83	UTMN 83	SiO2 (wt%)	Al2O3	Fe2O3T	CaO	MgO	Na2O	K2O	Cr2O3	TiO2	MnO	P2O5	SrO	BaO	C	S	H2O+	LOI	Total	Cl (ppm)	F	Ba	Ce	Cr	Cs	Dy	Er	Eu	Ga	Gd	Ge	Hf	Ho	La	Lu	Nb	Nd	Pr	Rb	Sm	Sn	Sr	Ta	Tb	Th	Tm
	DOUAY 1A	X260851	706780*	5490492	57.1	15.5	3.49	4.63	1.45	6.65	4.23	0.008	0.39	0.09	0.13	0.11	0.13	1.9	0.03	0.14	6.45	100.36	80	180	1105	111	50	0.52	2.14	0.95	1.74	18.3	4.64	˂5	2.7	0.39	42.2	0.12	19.2	54.6	14.3	68.7	8.52	1	894	0.6	0.48	4.24	0.11
	DOUAY 3	X260852	706772	5490477	73.4	15.5	0.84	0.07	0.02	5.84	5.7	0.002	0.01	0.01	0.03	˂0.01	˂0.01	0.01	0.01	0.14	0.22	101.64	70	80	32	63	20	0.51	0.65	0.21	0.51	26.8	1.17	˂5	0.2	0.1	11.4	0.04	2.9	13.5	3.46	96.3	2.33	˂1	14.8	˂0.1	0.13	1.19	0.04
	DOUAY 2	X260853	706778	5490484	60.8	17.35	2.65	2.98	0.42	6.88	5.15	˂0.002	0.28	0.07	0.13	0.12	0.17	0.84	0.04	0.36	3.46	100.46	80	260	1565	94.9	10	0.82	1.79	0.8	1.53	20.6	3.73	˂5	3.5	0.28	38.5	0.11	21	47.2	12.15	90.9	7.55	1	1095	0.7	0.4	6.25	0.1
	DOUAY 4	X260854	706775	5490487	58	16.25	2.93	4.14	1.03	7.68	3.39	0.004	0.29	0.08	0.19	0.06	0.17	1.46	0.14	0.1	5.07	99.28	˂50	310	1655	112.5	30	0.68	2.11	0.99	1.77	19.9	4.58	˂5	2.2	0.38	48.4	0.14	18.6	54	13.8	54.3	8.44	˂1	582	0.5	0.52	6.62	0.14
	DOUAY 5	X260855	706784	5490481	56.8	16	3.46	4.27	1.13	6.88	4.23	0.003	0.33	0.1	0.23	0.11	0.18	1.65	0.13	0.21	5.54	99.26	70	240	1595	102.5	20	0.6	1.85	0.73	1.57	17.5	4.34	˂5	2.7	0.28	40.5	0.13	22.3	53.1	13.4	68.4	8.17	1	990	0.7	0.42	5.41	0.1
	*Sample location: NAD83, UTM zone 17
	Titanium activity calculated using the method of Hayden and Watson (2007)
	Using generic temperatures (600°C and 800°C)
	Sample	UTM east	UTM north	FM parameter		Ti in melt - max (ppm)		Ti in rock (ppm)		aTiO2					Method of Hayden and Watson (2007)
	DOUAY 1A	706780	5490492	3.74605		2958.83		2337.99		0.790174
	DOUAY 3	706772	5490477	1.66144		120.314		59.9484		0.498267					Temparture (T, Celsius degrees):				800	600
	DOUAY 2	706778	5490484	2.71349		2203.34		1678.56		0.761823
	DOUAY 4	706775	5490487	3.34748		2640.56		1738.5		0.658385
	DOUAY 5	706784	5490481	3.51516		2770.06		1978.3		0.714171
	Using generic temperatures obtained below (method of Watson and Harrison 1983)
	DOUAY 1A	706780	5490492	3.74605		590.205		2337.99		3.96132
	DOUAY 3	706772	5490477	1.66144		72.8469		59.9484		0.822937
	DOUAY 2	706778	5490484	2.71349		902.175		1678.56		1.86057
	DOUAY 4	706775	5490487	3.34748		555.532		1738.5		3.12944
	DOUAY 5	706784	5490481	3.51516		638.562		1978.3		3.09805
	Zircon saturation temperature calculated using the method of Watson and Harrison (1983)
	Sample	UTM east	UTM north	M factor		Zr (ppm)		Temp (°C)							Method of Watson and Harrison (1983)
	DOUAY 1A	706780	5490492	2.79683		112		666.868
	DOUAY 3	706772	5490477	1.55185		8		569.769								DZrzircon/melt= −3.80−[0.85(M−1)]+12900/T
	DOUAY 2	706778	5490484	2.26261		152		721.939
	DOUAY 4	706775	5490487	2.64348		104		670.737								M = (Na + K + 2Ca)/(Al · Si)
	DOUAY 5	706784	5490481	2.68841		119		677.451
	Zircon saturation temperature calculated using the method of Borisov and Aranovich (2019)
	Sample	UTM east	UTM north	B factor		Zr (ppm)		Temp (°C)							Method of Borisov and Aranovich (2019)
	DOUAY 1A	706780	5490492	0.394316		112		436.847
	DOUAY 3	706772	5490477	0.356034		8		338.665
	DOUAY 2	706778	5490484	0.472146		152		413.937
	DOUAY 4	706775	5490487	0.251264		104		512.163
	DOUAY 5	706784	5490481	0.386524		119		443.887
															Experiments cover melts that contain 155 - 61,370 ppm Zr
	Carbonate saturation index
	Sample	UTM east	UTM north	Fe (molar)	Ca	Mg	Mn	C	Carb_index
	DOUAY 1A	706780	5490492	0.043707	0.0825606	0.0359712	0.00126868	0.158201	96.7549
	DOUAY 3	706772	5490477	0.0105197	0.00124822	0.000496155	0.000140964	0.000832639	6.7121
	DOUAY 2	706778	5490484	0.0331872	0.0531384	0.0104193	0.000986749	0.0699417	71.5651
	DOUAY 4	706775	5490487	0.0366938	0.0738231	0.025552	0.00112771	0.121565	88.6067
	DOUAY 5	706784	5490481	0.0433312	0.0761412	0.0280327	0.00140964	0.137386	92.2578
[truncated: 25 more columns]

## Sheet: S2
Table S2: Chemical composition of zircon grains from sample D1A
MERC Isotope Geochemistry Laboratory, Laurentian University
								Data for Tera-Wasserburg plot							Data for Wetherill plot				Dates											Timing			Trace elements
Sample nb	Type	f206c	206Pb	Uppm	Th/U	206Pb/204Pb	1s%	238U/206Pb	prop 2s (abs)	207Pb/206Pb	prop 2s (abs)	208Pb/206Pb	1s%	207Pb/235U	prop 2s (abs)	206Pb/238U	prop 2s (abs)	Rho	207Pb/206Pb	2s (abs)	2ssys (abs)	206Pb/238U	2s (abs)	2ssys (abs)	207Pb/235U	2s (abs)	2ssys (abs)	% conc		Start time	End time	Duration (s)	P31_ppm	P31_ppm_2SE (int)	P31_ppm_LOD	Ca43_ppm	Ca43_ppm_2SE (int)	Ca43_ppm_LOD	Sc45_ppm	Sc45_ppm_2SE (int)	Sc45_ppm_LOD	Ti49_ppm	Ti49_ppm_2SE (int)	Ti49_ppm_LOD	Fe57_ppm	Fe57_ppm_2SE (int)	Fe57_ppm_LOD	Sr88_ppm	Sr88_ppm_2SE (int)
DO1_1_1	big grain	7.86226	0.150596	10364.9	0.216233	196.025	3.74222	17.8306	0.926835	0.138443	0.00593226	0.295901	2.23907	1.08186	0.0839296	0.0565772	0.00296242	0.493923	2163.36	73.6229	73.7151	354.695	6.68833	18.0646	736.523	25.8984	38.882	16.3955		2021-09-10 01:10:19.132	2021-09-10 01:10:19.132	25.332	1844.4	80.9958	91.0527	Below LOD	907.589	1593.73	1094.93	64.8917	1.94336	19.2359	3.53678	1.42353	749.282	90.0659	46.2281	35.2718	3.66941
DO1_1_2	big grain	-0.583275	0.103087	7047.45	0.0790575	-3075.72	130.178	16.3814	0.831369	0.0674542	0.000550737	0.078421	2.49266	0.569408	0.0339662	0.0613307	0.00309585	0.842353	848.761	16.4477	17.0448	383.663	5.1067	18.802	457.277	5.38164	21.8242	45.2027		2021-09-10 01:12:52.505	2021-09-10 01:12:52.505	26.639	1275.46	97.2039	94.0712	2458.95	1083.46	1696.4	1106.65	69.6254	1.98128	90.7512	18.5045	1.47869	750.563	121.456	43.5667	22.3493	2.27527
DO1_1_3	big grain	3.46643	0.199929	15370.1	0.07	493.642	3.13165	19.477	1.04241	0.0860448	0.000694164	0.118404	0.707935	0.614922	0.0384492	0.051613	0.0027045	0.94159	1339.07	14.3622	14.897	324.346	6.14487	16.549	485.672	9.05834	23.8785	24.2218		2021-09-10 01:14:07.587	2021-09-10 01:14:07.587	25.986	3668.03	282.495	97.6096	13978.2	3475.92	1707.93	1366.42	67.7504	2.03692	25.3135	2.03576	1.49084	2802.64	158.823	48.3252	199.814	22.5015
DO1_1_4	big grain	5.37992	0.0767148	5435.04	0.0474191	301.102	4.4494	15.5153	0.789101	0.110293	0.00149138	0.172835	1.11183	0.988481	0.0628966	0.0649505	0.00337462	0.886001	1798.81	24.305	24.616	405.568	7.22048	20.4079	695.919	13.2436	31.6739	22.5465		2021-09-10 01:15:28.546	2021-09-10 01:15:28.546	25.009	1383.49	97.8864	108.053	Below LOD	988.646	1965.9	849.591	42.7376	2.38288	7.70813	1.26978	1.67392	1076.35	85.4909	54.227	17.8569	1.37802
DO1_1_5	big grain	8.43449	0.131697	10916.7	0.372715	182.184	1.78233	17.6634	0.941439	0.136239	0.00197221	0.322305	2.25599	1.07678	0.0731659	0.0577112	0.0032826	0.914066	2174.18	24.8545	25.1312	361.495	10.3573	19.9533	738.188	18.0719	34.4094	16.6268		2021-09-10 01:16:42.563	2021-09-10 01:16:42.563	25.014	2129.09	155.482	116.463	Below LOD	1149.71	2073.86	1244.73	66.2196	2.51925	13.8736	1.68913	1.70948	1196.93	115.502	54.1647	58.0607	6.60328
DO1_1_6	big grain	4.25567	0.113381	5614.7	0.42557	396.347	13.2752	15.2361	0.755803	0.0915472	0.00197209	0.180116	3.80367	0.82135	0.050006	0.0656954	0.00326678	0.445664	1452.66	37.9209	38.1099	410.158	4.07222	19.7586	611.828	10.7162	34.2608	28.235		2021-09-10 01:17:54.473	2021-09-10 01:17:54.473	9.794	1099.64	120.374	113.441	Below LOD	1245.88	2030.16	392.847	42.3613	2.52217	3.50922	1.42194	1.85072	684.597	154.377	56.4833	18.8438	3.62102
DO1_1_7	big grain	5.68384	0.0730501	5023.24	0.107176	283.881	10.0084	15.976	0.782604	0.114182	0.00455739	0.197556	3.27411	0.993047	0.0707522	0.0627928	0.00314146	0.327739	1829.39	66.888	66.9846	392.551	4.49464	19.0374	695.396	20.4525	35.041	21.4581		2021-09-10 01:19:10.219	2021-09-10 01:19:10.219	25.014	1153.76	79.1122	123.221	Below LOD	998.137	2178.13	501.629	28.8601	2.61618	8.74576	1.34682	1.74792	727.889	65.1959	58.1946	20.7038	1.75705
DO1_1_8	big grain	3.00822	0.0867981	6243.34	0.0783579	563.676	55.6553	14.7108	0.64364	0.089819	0.00110204	0.138594	1.14003	0.838354	0.0506271	0.0677753	0.00341005	0.734645	1416.82	22.5134	22.8646	422.688	5.30116	20.6123	617.495	7.98425	27.7273	29.8335		2021-09-10 01:20:28.711	2021-09-10 01:20:28.711	25.005	1219.75	88.778	111.872	Below LOD	1228.8	1981.47	406.825	20.6867	2.33276	1.96848	0.913107	1.69743	469.469	54.3164	55.342	28.1779	3.09905
DO1_1_9	big grain	7.26568	0.138171	6833.26	0.0769318	214.893	6.55158	14.3355	0.785279	0.128731	0.00340706	0.221574	2.12876	1.24611	0.0884717	0.0700961	0.00375231	0.818093	2072.6	48.1983	48.357	436.669	9.43993	22.6143	819.124	23.2448	40.0837	21.0686		2021-09-10 01:21:40.747	2021-09-10 01:21:40.747	10.28	1513.45	133.892	105.795	Below LOD	937.16	1863.52	1604.72	73.1059	2.27826	7.22226	2.08689	1.69911	874.624	112.188	54.9892	42.8903	4.09629
DO1_1_10	big grain	3.28299	0.252856	20252	0.245531	553.094	729.978	24.3748	1.77298	0.0637421	0.00205561	0.0749838	2.79241	0.371656	0.025628	0.043222	0.00304089	0.783295	705.644	64.7134	64.8567	272.499	13.5756	18.7904	319.867	10.3479	19.0079	38.617		2021-09-10 01:23:01.176	2021-09-10 01:23:01.176	20.736	726.343	98.2562	137.507	Below LOD	1318.13	2445.24	548.586	34.9746	2.97269	69.061	6.68433	2.01035	1806.34	196.374	67.0534	41.8402	4.088
DO1_1_11	big grain	12.557	0.0926544	8464.6	0.265444	112.565	1.48406	16.3379	0.771731	0.186711	0.00263974	0.400676	0.82995	1.58909	0.0978455	0.061321	0.00310022	0.850153	2707.86	24.0678	24.349	383.605	5.12508	18.8294	963.822	13.2972	38.7675	14.1664		2021-09-10 01:26:33.035	2021-09-10 01:26:33.035	26.145	4397.18	200.181	127.343	Below LOD	1303.36	2243.72	1328.37	38.0112	2.80175	271.929	24.6827	2.05068	8392.43	478.121	62.1665	73.3539	5.17487
DO1_1_13	big grain	6.17075	0.25402	21409	0.194978	259.674	3.36443	22.0188	1.24946	0.116898	0.0046751	0.238688	3.15159	0.72446	0.0580553	0.0454706	0.00244281	0.914194	1882.43	64.5549	64.6478	286.577	6.39059	15.0238	551.819	23.2363	33.5676	15.2238		2021-09-10 01:29:08.833	2021-09-10 01:29:08.833	25.745	2576.27	127.759	86.4447	Below LOD	865.615	1571.21	2152.77	156.542	1.86387	65.2277	5.83433	1.33674	2224.64	150.675	40.7006	127.205	11.7713
DO1_1_16	big grain	1.95806	0.22957	17137.8	0.0652745	899.013	6.72732	17.3521	0.925203	0.0756585	0.00266677	0.0812882	3.73469	0.605219	0.0426085	0.0580068	0.00300394	0.469142	1055.47	66.1615	66.2841	363.431	6.29812	18.3101	478.279	15.0432	26.3671	34.4331		2021-09-10 01:32:54.833	2021-09-10 01:32:54.833	21.505	2388.29	147.609	108.898	Below LOD	932.17	1840.76	1262.64	70.6579	2.35059	11.6108	2.95396	1.65799	513.098	66.6045	55.8454	16.5446	1.23574
DO1_1_17	big grain	15.432	0.148598	10041.3	3.39212	85.83	2.23632	14.766	0.832473	0.23715	0.0105873	0.793889	2.09775	2.28808	0.198767	0.0688007	0.00378059	0.82542	3063.01	64.1738	64.2478	428.72	10.5678	22.803	1185.87	43.3137	58.0744	13.9967		2021-09-10 01:34:04.446	2021-09-10 01:34:04.446	25.639	2884.67	155.9	103.078	14709.5	3126.01	1922.23	1986.41	117.071	2.30011	49.5474	6.03125	1.55832	2364.68	238.103	53.2968	77.0931	7.46564
DO1_1_18	big grain	12.6921	0.0775749	5249.31	0.218577	128.173	155.477	15.3862	0.783264	0.111968	0.00605016	0.242307	4.8623	1.02617	0.0934311	0.065496	0.00340888	0.792127	1765.52	88.4159	88.4855	408.867	7.28555	20.6035	703.648	33.2615	43.0763	23.1585		2021-09-10 01:35:20.839	2021-09-10 01:35:20.839	25.014	3569.47	209.729	107.571	Below LOD	1089.2	1926.39	495.617	21.3473	2.3253	2.81346	0.841831	1.68726	337.996	39.5246	56.2372	14.6395	1.44133
DO1_1_19	big grain	5.86776	0.134809	15629.7	1.49902	276.552	3.56503	21.1386	1.2029	0.108392	0.00276282	0.440394	1.69604	0.700688	0.0459278	0.047545	0.00256612	0.783335	1757.07	41.8727	42.0214	299.348	6.81703	15.7676	537.432	12.2226	25.9679	17.0368		2021-09-10 01:36:30.394	2021-09-10 01:36:30.394	25.004	3345.66	200.037	134.192	Below LOD	1447.32	2502.83	1816.5	94.2035	2.93507	106.673	15.5537	2.08691	3183.81	299.994	66.8559	100.509	6.134
DO1_1_20	big grain	7.05411	0.0683077	5582.17	1.07552	221.487	3.97104	15.4336	0.782264	0.128294	0.00207881	0.304144	3.16857	1.15889	0.0760304	0.065328	0.00341708	0.872894	2067.83	27.5143	27.758	407.844	7.54506	20.6456	778.352	16.1909	34.3741	19.7233		2021-09-10 01:37:49.007	2021-09-10 01:37:49.007	25.008	993.492	95.523	133.225	34209.1	4162.51	2419.19	1268.26	90.5943	2.89444	8.54991	1.92799	2.04387	662.88	86.9875	67.3837	134.81	13.115
DO1_1_21	big grain	6.18078	0.173217	18724.2	0.358897	260.972	2.0265	20.9369	1.17086	0.112249	0.00133571	0.253173	0.875368	0.757357	0.0528133	0.0487362	0.00277674	0.959964	1831.88	20.6941	21.0379	306.614	8.86362	17.0455	569.301	16.3697	29.3292	16.7377		2021-09-10 01:44:43.069	2021-09-10 01:44:43.069	25.016	2246.42	134.927	132.291	Below LOD	986.994	2378.12	1516.71	88.393	2.89183	7.6741	1.39574	2.07878	1362.71	132.709	67.8132	46.2751	3.55062
DO1_1_22	big grain	7.58309	0.0811634	5842.15	0.0914691	202.284	5.70262	14.3406	0.692966	0.140286	0.00626736	0.281029	3.30292	1.33614	0.104354	0.0702414	0.00365254	0.896936	2195.73	75.7725	75.8597	437.501	7.75547	21.9275	857.782	31.0585	46.2137	19.925		2021-09-10 01:45:57.387	2021-09-10 01:45:57.387	25.034	1246.35	112.782	148.908	3713.73	1572.53	2590.16	509.432	31.7455	3.21278	18.2972	2.42946	2.32573	696.336	83.4892	78.0267	35.0355	4.36657
DO1_1_23	big grain	2.72487	0.0680494	4702.56	0.137265	614.712	37.1003	14.5001	0.738695	0.0944515	0.00307994	0.149037	3.92619	0.916282	0.0716532	0.0692112	0.00355877	0.888342	1502.82	55.7806	55.9014	432.648	7.36823	22.8127	653.98	22.619	33.6148	28.7892		2021-09-10 01:47:15.934	2021-09-10 01:47:15.934	25.159	920.367	91.3357	129.546	Below LOD	764.702	2378.64	361.096	23.4201	2.90005	14.4709	1.80508	2.14506	1435.64	196.406	64.1586	11.9798	1.63792
DO1_1_24	big grain	8.87449	0.0725628	5573.82	0.38119	169.89	3.40246	14.6383	0.876444	0.146325	0.00368674	0.298053	2.12174	1.41466	0.112123	0.0693814	0.0040724	0.918927	2303.08	46.1998	46.3677	432.087	13.754	24.5776	888.909	33.4738	48.9635	18.7612		2021-09-10 01:48:29.918	2021-09-10 01:48:29.918	25.005	656.365	91.5747	118.311	3722.67	1473.49	2104.77	534.748	33.735	2.63386	22.1017	2.59369	1.80484	505.636	63.2043	60.1092	59.1752	7.97995
DO1_1_25	big grain	6.1221	0.0574002	4188.56	0.181984	255.402	10.9468	13.85	0.707105	0.128482	0.00310513	0.248483	1.71348	1.29253	0.0880203	0.0725666	0.00368626	0.867061	2062.35	41.9862	42.1521	451.526	6.36918	22.1542	837.599	20.3323	38.5277	21.8938		2021-09-10 01:49:48.082	2021-09-10 01:49:48.082	25.134	828.285	85.3144	123.447	Below LOD	1194.42	2304.95	428.266	23.5852	2.70292	23.6474	2.74241	1.99379	1400.84	158.376	64.7916	15.3798	1.87301
DO1_1_26	big grain	7.86256	0.0729643	6454.93	0.0780268	194.765	3.35508	15.5068	0.826208	0.139504	0.00319119	0.255043	1.62914	1.26136	0.0877522	0.0652263	0.00348323	0.853028	2207.18	40.8641	41.0445	407.194	8.6926	21.0681	823	21.8268	39.2828	18.4486		2021-09-10 01:51:02.326	2021-09-10 01:51:02.326	25.098	1808.92	106.085	184.99	16331.7	2637.43	3578.11	1892.94	102.014	4.13671	8.58654	1.77218	3.17024	1795.38	200.773	90.6737	59.259	4.98624
DO1_1_27	big grain	5.43742	0.0843385	6857.23	0.138383	288.889	11.5843	15.1667	0.807522	0.127496	0.00481967	0.223352	2.89585	1.20808	0.107345	0.067153	0.00379415	0.974267	2029.37	63.9045	64.0074	418.733	11.6309	22.859	789.195	35.5091	46.7761	20.6337		2021-09-10 01:52:11.783	2021-09-10 01:52:11.783	25.066	1480.36	121.095	176.308	Below LOD	1342.4	3410.89	1220.56	85.6599	3.94535	29.6999	3.66742	3.02251	1166.32	121.189	86.5447	23.7771	2.759
DO1_1_28	big grain	10.7779	0.0683949	5072.94	0.753308	134.029	4.46872	15.2207	0.773001	0.174273	0.00488693	0.369296	1.99684	1.5964	0.102802	0.0662632	0.0034711	0.498626	2587.95	46.392	46.528	413.493	7.78661	20.9566	968.233	17.4425	39.6861	15.9777		2021-09-10 01:53:30.053	2021-09-10 01:53:30.053	25.016	985.871	90.0845	151.966	Below LOD	1106.95	2598.65	1131.17	71.3566	3.43006	87.3943	8.11045	2.15545	1320.75	117.875	76.3134	42.1227	4.13909
DO1_1_29	big grain	4.87779	0.0761547	6417.23	0.156147	335.521	5.2614	17.1999	0.872004	0.105568	0.00160203	0.171058	1.22111	0.849853	0.0526925	0.0583096	0.00290804	0.785286	1717.64	26.9916	27.2646	365.309	3.94458	17.7192	623.345	10.2951	28.5622	21.2681		2021-09-10 01:54:48.171	2021-09-10 01:54:48.171	25.008	1114.92	86.9513	114.538	5451.25	1637.84	2121.31	738.129	51.4602	2.57404	19.4775	2.18138	1.79871	948.543	106.519	59.0503	47.9913	4.065
DO1_1_30	big grain	3.92519	0.071408	7034.61	0.220488	421.962	11.2002	16.8394	0.822588	0.100272	0.00184494	0.165966	1.92267	0.830524	0.0595838	0.0600084	0.00332329	0.952499	1619.93	31.9952	32.2143	375.507	9.63096	20.1464	612.667	19.2533	32.5492	23.1805		2021-09-10 01:56:02.007	2021-09-10 01:56:02.007	25.007	1213.93	115.468	129.823	44077.5	5736.16	2256.15	1486.15	108.883	2.84489	17.8632	2.26601	1.98985	1089.06	117.725	67.8488	112.25	11.2644
DO1_1_33	big grain	1.78506	0.10625	8384.24	0.0877859	941.868	26.3281	15.1287	0.782225	0.0982484	0.0063092	0.141381	6.25141	0.96714	0.116508	0.0678108	0.00405628	0.98795	1492.2	105.253	105.311	422.573	14.1823	24.3473	658.6	46.8686	53.4279	28.3188		2021-09-10 02:02:15.407	2021-09-10 02:02:15.407	25.964	1445.59	135.616	137.194	Below LOD	1196.75	2532.02	1179.46	70.3984	3.12446	15.8821	2.82759	2.18635	825.675	84.5583	73.23	24.8417	2.07014
DO1_1_35	big grain	4.32116	0.0861078	8199.87	0.197945	384.075	6.47442	16.9086	0.894059	0.0992617	0.00153654	0.148794	1.82257	0.820332	0.0540839	0.0596783	0.00311939	0.928707	1602.98	28.395	28.6709	373.577	7.01539	18.9702	605.765	14.4137	29.9177	23.3052		2021-09-10 02:04:47.730	2021-09-10 02:04:47.730	25.949	2650.7	163.439	149.727	Below LOD	1362.57	2853.25	1555.23	84.2217	3.34853	11.1513	1.75747	2.22326	1078.74	109.834	77.2017	35.529	2.97597
DO1_1_36	big grain	21.872	0.221918	14056.5	0.133133	53.7998	0.323378	8.6693	0.425542	0.331712	0.00187363	0.762214	0.236238	5.28481	0.312566	0.115559	0.00573651	0.918063	3623.91	8.04906	8.69903	704.891	6.7931	33.1239	1865.41	10.7236	50.5464	19.4511		2021-09-10 02:06:07.819	2021-09-10 02:06:07.819	19.249	2287.77	190.392	198.645	4890.73	2419.46	3805.11	1183.67	85.0596	4.45489	61.49	6.81066	2.97509	2391.56	204.579	103.251	173.7	15.7776
DO1_1_37	big grain	4.35945	0.0730371	6490.04	0.111306	396.848	68.2637	16.677	0.861978	0.0804552	0.00190662	0.102721	4.82233	0.671124	0.04237	0.0606536	0.00324332	0.268892	1192.07	43.5925	43.7717	379.475	8.25341	19.6892	522.498	11.2489	28.0535	31.8334		2021-09-10 02:07:21.539	2021-09-10 02:07:21.539	25.02	1214.67	107.851	154.83	Below LOD	1259.87	2871.81	701.76	51.0062	3.55909	12.6882	2.43967	2.38715	731.376	109.819	87.1441	23.7788	2.33153
DO1_1_38	big grain	6.26109	0.0662845	5516.81	0.277779	244.122	10.2011	15.9987	1.52283	0.147776	0.00977682	0.298187	4.50399	1.40441	0.173839	0.0656629	0.00488046	0.889353	2219.95	110.529	110.587	409.058	22.4486	29.6876	851.616	65.4818	74.0649	18.4264		2021-09-10 02:08:35.473	2021-09-10 02:08:35.473	25.011	1469.91	91.3395	117.312	Below LOD	1291.5	2177.02	490.065	20.3209	2.64481	19.65	2.74091	1.84734	2075.78	168.44	63.6839	28.2006	4.0889
DO1_1_39	big grain	3.29759	0.0769306	5773.35	0.103339	518.404	17.6519	15.2638	0.794675	0.0860749	0.00121101	0.10698	1.76452	0.785103	0.0499866	0.0658932	0.00335695	0.892114	1338.17	27.2359	27.5573	411.296	6.17625	20.3105	586.745	11.907	28.2761	30.7357		2021-09-10 02:09:49.588	2021-09-10 02:09:49.588	25.009	1052.48	99.1418	114.552	Below LOD	1185.79	2128.5	1259.35	66.3727	2.58888	6.51936	1.55838	1.88965	538.707	78.7691	63.1532	12.0396	1.47819
DO1_1_40	big grain	8.34195	0.104653	9264.91	1.61372	183.746	1.69991	15.7385	0.755286	0.138019	0.000901676	0.582555	2.49286	1.21096	0.0708685	0.0636579	0.00313413	0.808224	2200.79	10.7875	11.4189	397.811	3.48834	18.9789	805.242	5.77705	32.2033	18.0758		2021-09-10 02:10:59.069	2021-09-10 02:10:59.069	25.014	1646.63	120.677	152.51	Below LOD	1152.13	2790.22	1549.89	79.0679	3.3745	9.74865	1.55675	2.22861	958.32	105.773	79.7129	76.5744	5.95156
DO1_1_41	big grain	7.20415	0.107089	11235.7	0.531086	219.143	2.32743	18.5045	0.972667	0.123228	0.00244704	0.276002	1.03942	0.930652	0.0624802	0.0545169	0.00284994	0.883908	2004.21	31.9193	32.1067	342.118	6.45359	17.4192	664.767	16.7665	32.9738	17.07		2021-09-10 02:13:36.724	2021-09-10 02:13:36.724	25.014	1736.45	125.053	161.204	11039.5	2345.34	2964.23	1453.06	76.0997	3.60288	15.2465	2.60079	2.34688	964.585	89.3376	81.3673	90.3563	11.4325
DO1_1_42	big grain	9.93903	0.0438848	2253.4	1.09518	161.417	71.1477	14.618	0.724041	0.116194	0.0049963	0.385132	1.46222	1.10627	0.0899044	0.0685703	0.00347774	0.970895	1873.22	74.3266	74.419	427.504	5.68788	20.963	750.787	29.5575	42.1133	22.8219		2021-09-10 02:14:45.996	2021-09-10 02:14:45.996	13.751	4357.8	1891.18	109.211	Below LOD	741.876	1926.88	336.929	19.2838	2.44333	25.5452	5.14869	1.77695	208.48	103.802	59.4049	14.2719	4.54874
DO1_1_43	big grain	3.85508	0.0706881	7829.71	0.151886	437.328	14.0661	17.4419	0.93261	0.0917828	0.00135999	0.230012	7.60127	0.739951	0.0483534	0.057867	0.00302931	0.851764	1456.16	27.5656	27.8584	362.553	6.97042	18.4629	560.367	13.2759	28.375	24.8979		2021-09-10 02:16:04.757	2021-09-10 02:16:04.757	25.01	1950.42	113.764	136.611	3603.91	1415.04	2445.41	1408.59	90.0568	3.13394	149.317	29.8906	2.12135	1235.94	108.802	69.6008	51.8656	5.25233
DO1_1_44	big grain	2.74177	0.0614262	4860.27	0.0783662	613.311	70.9879	14.6182	0.724965	0.0936924	0.00184518	0.125644	1.9807	0.890903	0.05801	0.0687413	0.00347687	0.837273	1490.84	35.8656	36.0798	428.502	6.0191	20.9529	644.513	14.1398	30.5854	28.7424		2021-09-10 02:17:18.777	2021-09-10 02:17:18.777	25.024	1126.82	112.625	113.381	Below LOD	1177.08	2140.15	966.946	68.5689	2.5787	4.43638	1.09238	1.95194	564.647	113.268	59.5952	329.191	63.0234
DO1_1_45	big grain	2.66439	0.0869895	6773.27	0.124865	651.803	41.7972	13.7028	0.667397	0.0800374	0.00102244	0.118133	1.43458	0.811175	0.0509103	0.0733639	0.00373231	0.895706	1192.43	24.498	24.8499	456.308	6.77082	22.3756	603.472	11.4721	29.299	38.267		2021-09-10 02:18:37.369	2021-09-10 02:18:37.369	25.014	1359.47	112.842	140.545	Below LOD	1085.39	2608.85	875.901	39.661	3.10849	9.00589	1.66069	2.15383	1167.38	176.442	78.8826	24.7345	2.04709
DO1_1_46	big grain	4.64442	0.10736	9834.94	0.065403	354.581	3.91369	16.6549	0.858737	0.102592	0.00120899	0.154521	1.10428	0.852767	0.0514052	0.0603434	0.00305802	0.754952	1667.18	21.2197	21.5792	377.662	5.34147	18.5925	625.446	7.89319	27.7122	22.6528		2021-09-10 02:19:46.974	2021-09-10 02:19:46.974	25.094	1407.39	113.075	146.659	Below LOD	1196.25	2779.22	892.4	41.0055	3.28103	3.75326	1.4823	2.30044	1098.03	105.165	79.163	67.7442	4.99524
DO1_1_47	big grain	11.9612	0.0995101	5826.57	0.0948789	118.413	2.61692	13.7346	0.684315	0.186712	0.00578553	0.37753	1.98144	1.88832	0.133367	0.0729981	0.00365566	0.853955	2696.05	50.5907	50.7121	454.154	5.21042	21.9559	1070.5	26.6298	46.4192	16.8451		2021-09-10 02:20:56.934	2021-09-10 02:20:56.934	19.857	2321.35	123.893	101.376	Below LOD	1257.55	1820.46	402.883	14.0397	2.26056	20.9956	2.28868	1.67064	799.067	75.4119	55.4187	18.4747	1.86594
DO1_1_48	big grain	-0.475176	0.355418	49704.4	0.114033	-3906.3	110.361	19.7655	1.16721	0.0551942	0.000911776	0.0438269	0.584168	0.389984	0.0268459	0.0514395	0.00326407	0.915021	414.759	35.6778	35.9817	323.216	12.8139	19.9632	333.767	10.5302	19.4363	77.9286		2021-09-10 02:22:25.015	2021-09-10 02:22:25.015	11.715	1765.4	222.543	231.167	Below LOD	1856.56	4192.7	1811.19	144.321	5.38339	68.3665	7.51346	3.91046	2690.84	351.691	116.532	69.6899	7.98966
DO1_1_51	big grain	12.7761	0.0899535	10380	0.209626	109.339	2.29386	16.2854	1.07882	0.193653	0.00641095	0.450418	2.6007	1.68856	0.12264	0.063438	0.00401839	0.603834	2756.11	47.861	47.9615	396.143	15.5691	24.3585	1001.95	28.5635	47.2607	14.3732		2021-09-10 02:28:14.135	2021-09-10 02:28:14.135	20.596	3305.92	266.848	166.608	83866.3	20547.5	3127.47	1664.85	130.458	3.81117	22.9196	3.86674	2.60057	1426.11	285.026	90.7828	220.838	42.6209
DO1_1_52	big grain	19.9768	0.0221536	674.333	1.00053	58.8194	4.54378	8.93476	0.522096	0.340813	0.0170645	0.882266	2.28082	5.75232	0.717558	0.116896	0.00853021	0.996696	3630.13	71.9999	72.0659	710.805	36.1278	48.4876	1871.28	83.0424	93.7351	19.5807		2021-09-10 02:29:28.292	2021-09-10 02:29:28.292	19.673	8651.41	1779.9	90.7241	17897.2	4869.98	1597.26	244.546	21.9233	2.06089	12.4645	1.72548	1.44289	403.1	78.2535	53.9208	12.0605	2.75349
DO1_1_53	big grain	6.32034	0.0770065	5322.85	0.0900243	246.92	5.75042	14.252	0.693522	0.13234	0.00654493	0.23957	3.79792	1.29192	0.104885	0.0702877	0.00347354	0.716582	2075.89	78.1056	78.179	437.864	3.66621	20.9085	830.989	30.2977	43.1221	21.0928		2021-09-10 02:30:44.740	2021-09-10 02:30:44.740	25.012	2276.03	109.302	109.49	Below LOD	932.622	2060.12	363.32	13.8252	2.42882	4.72148	1.07996	1.71889	285.422	50.5855	59.5707	13.3189	1.29685
DO1_1_54	big grain	4.77941	0.0727871	6225.08	0.157151	341.497	4.91327	16.3702	0.939792	0.10752	0.00294837	0.178848	2.42766	0.904782	0.0537517	0.0618082	0.0033009	0.0896547	1739.42	45.7419	45.8821	386.493	8.10723	20.0704	653.793	6.47932	28.5255	22.2197		2021-09-10 02:32:03.148	2021-09-10 02:32:03.148	25.066	1014.58	107.532	121.988	10043.6	2975.17	2295.32	852.863	41.6764	2.7353	17.3847	4.29992	2.03794	464.221	65.1078	65.0371	49.6581	7.67892
DO1_1_55	big grain	14.3232	0.0521987	2919.6	0.136334	100.22	43.7562	15.7019	0.913923	0.182199	0.00954475	0.398083	3.46647	1.58688	0.107186	0.0646634	0.00352835	-0.269632	2617.36	81.5233	81.5915	403.754	9.82132	21.3895	959.798	21.7281	42.2029	15.426		2021-09-10 02:33:18.745	2021-09-10 02:33:18.745	24.603	917.515	71.4948	81.824	5146.63	2008.59	1509.88	511.055	24.765	1.82961	12.9647	2.59237	1.24289	47.4631	26.8156	44.8678	26.1148	6.05533
DO1_1_56	big grain	-42.6569	0.0661057	5681.97	0.155943	-43.4356	772.772	15.9482	0.773963	0.0557428	0.00026129	0.0426769	2.07073	0.483392	0.0290634	0.0629523	0.00319309	0.965446	440.504	9.31533	10.4731	393.508	5.0652	19.3359	400.108	4.98479	19.6948	89.3313		2021-09-10 02:34:35.359	2021-09-10 02:34:35.359	25.168	1148.99	76.5616	119.827	Below LOD	1246.02	2240.38	482.072	22.5104	2.72278	24.9928	3.31461	1.96045	615.238	88.4201	66.2845	15.5159	1.52257
DO1_1_57	big grain	7.23654	0.0829541	5489.64	0.0650257	214.609	4.47153	14.3691	0.714736	0.133735	0.00505812	0.23161	2.94605	1.29957	0.0986092	0.0699875	0.00358485	0.806683	2110.27	68.3704	68.4803	436.001	6.61889	21.5744	836.423	28.0305	43.3849	20.6609		2021-09-10 02:35:49.354	2021-09-10 02:35:49.354	25.19	1171.5	83.0995	109.048	Below LOD	1185.48	2090.01	1467.31	69.9872	2.44367	26.528	4.02255	1.69524	1126.18	148.755	57.2824	20.4647	2.19173
DO1_1_58	big grain	8.61378	0.0619804	4075.55	0.565897	174.033	3.76691	13.4024	0.636601	0.152756	0.00530969	0.347348	2.4653	1.57911	0.112563	0.0747036	0.00364561	0.913616	2348.4	58.911	59.0232	464.412	3.26392	21.8451	954.546	25.3524	43.234	19.7757		2021-09-10 02:36:59.112	2021-09-10 02:36:59.112	25.038	1551.96	131.084	117.785	7962.64	2334.92	2295.34	374.619	28.9475	2.68256	26.0528	2.79543	1.90221	476.41	103.326	65.8311	114.561	30.1895
DO1_1_59	big grain	11.2093	0.0832867	5360.66	0.21337	126.346	4.02818	13.016	0.647255	0.1908	0.00888159	0.386751	3.02999	2.06266	0.172615	0.0773822	0.0040207	0.882715	2696.53	81.8015	81.8882	480.354	8.30225	24.0097	1116.47	42.1148	58.2953	17.8138		2021-09-10 02:38:08.556	2021-09-10 02:38:08.556	25.013	1093.7	82.6166	114.609	Below LOD	1216.23	2089.83	491.026	21.6808	2.54178	20.7766	2.60884	1.91488	554.592	62.4461	66.2864	17.2606	1.80237
DO1_1_60	big grain	1.49047	0.271979	38244.1	0.521365	1197.39	6.72525	23.4619	1.325	0.0698934	0.00159779	0.188582	1.91234	0.422068	0.0308983	0.0435747	0.00251746	0.896582	907.557	47.7505	47.9616	274.825	8.39945	15.5283	355.441	13.4871	21.9726	30.2818		2021-09-10 02:39:22.500	2021-09-10 02:39:22.500	25.023	1517.39	120.719	125.164	Below LOD	1218.32	2452.74	803.02	38.305	2.95026	20.7965	2.6183	1.99569	1434.23	118.996	69.095	76.7099	9.12515
DO1_1_61	big grain	-0.263664	0.241402	27684.1	0.193322	-6982.35	155.13	24.6386	1.45976	0.0575224	0.000715476	0.0782721	2.91656	0.328631	0.0225434	0.0409959	0.00246425	0.922099	505.847	24.752	25.1275	258.858	8.91985	15.1841	287.554	9.07904	16.887	51.1731		2021-09-10 02:41:51.170	2021-09-10 02:41:51.170	25.056	4942.76	246.976	108.489	3736.83	1321.11	2003.51	2719.81	110.591	2.47097	43.1459	3.81029	1.66163	2338.42	137.297	57.7722	178.141	9.55278
DO1_1_62	big grain	0.361096	0.0964896	6645.54	0.144891	4862.58	52.7265	14.9806	0.751934	0.0758628	0.00132472	0.110608	3.58788	0.704921	0.0464273	0.0671416	0.00343603	0.927181	1081.76	33.5925	33.8482	418.836	6.43051	20.7395	539.745	13.0151	27.214	38.7179		2021-09-10 02:43:01.065	2021-09-10 02:43:01.065	25.012	1203.82	90.8663	132.718	Below LOD	810.181	2541.59	412.005	19.955	3.03211	5.85575	1.50704	2.14615	958.992	254.789	74.8425	10.5219	1.23571
DO1_1_63	big grain	5.11202	0.0998214	8450.87	0.997805	312.809	11.0175	19.4833	1.17629	0.118944	0.00494734	0.306626	2.67984	0.859401	0.0668502	0.052446	0.00298649	0.574421	1897.98	72.0044	72.1001	329.358	9.5228	18.3021	623.205	23.7895	35.5676	17.3531		2021-09-10 02:44:15.142	2021-09-10 02:44:15.142	25.005	2436.61	318.261	98.5089	6884.01	2742.59	1807.76	403.419	24.0129	2.23564	41.822	9.44667	1.63573	620.965	139.893	53.6753	36.1251	6.82657
DO1_1_65	big grain	7.13074	0.0689236	4371.62	0.144421	232.333	46.4695	14.6584	0.695314	0.0997795	0.000734937	0.154329	0.656033	0.942289	0.0565564	0.0685239	0.00346624	0.906391	1617.8	13.0648	13.6551	427.194	5.85341	20.863	673.348	7.89969	29.0269	26.4059		2021-09-10 02:46:43.003	2021-09-10 02:46:43.003	25.011	908.12	71.9301	97.4566	Below LOD	945.192	1738.39	400.008	17.8973	2.25478	5.60667	0.863221	1.55484	307.712	58.6943	51.3763	12.6293	2.13399
DO1_1_66	big grain	0.453081	0.0562233	4380.36	0.681977	3969.91	76.2471	16.2052	0.827262	0.0664912	0.000581394	0.0827585	1.19218	0.567037	0.0335207	0.0619033	0.00308338	0.767859	818.597	17.6502	18.2051	387.156	4.30438	18.7264	455.839	4.72287	21.798	47.2951		2021-09-10 02:47:57.099	2021-09-10 02:47:57.099	25.006	2844.73	485.734	108.931	Below LOD	1259.02	2023.37	1146.42	73.9692	2.55691	73.2919	5.37908	1.66193	1649.23	263.707	60.533	26.9725	2.23165
DO1_1_67	big grain	2.81659	0.070219	3980.96	0.109051	586.18	43.3777	15.1776	0.73218	0.102786	0.00340447	0.154568	3.21382	0.931855	0.0672353	0.066307	0.00342311	0.779001	1646.23	59.1821	59.3062	413.784	6.8087	20.6415	670.328	21.7435	36.4203	25.1352		2021-09-10 02:49:11.279	2021-09-10 02:49:11.279	25.053	1170.49	58.4088	97.2005	Below LOD	792.053	1922.44	381.574	15.6848	2.2354	5.13471	1.53434	1.52723	164.844	35.7096	53.1883	10.2103	1.16251
DO1_1_68	big grain	4.55791	0.0874423	7588.98	0.140998	363.379	5.47292	17.6204	0.920327	0.100004	0.0011289	0.151181	1.03218	0.784126	0.0484086	0.056952	0.00301818	0.867938	1620.09	20.2801	20.6555	356.967	7.29925	18.4385	586.789	9.547	27.4712	22.0337		2021-09-10 02:50:30.257	2021-09-10 02:50:30.257	25.062	1545.15	86.7421	103.179	Below LOD	1409.03	1921.76	1518.71	65.322	2.36521	10.8244	1.654	1.72226	433.382	51.1272	57.4514	33.9392	2.90515
DO1_1_69	big grain	14.5412	0.109374	6577.35	0.0806473	93.1435	1.18972	12.5943	0.647693	0.214842	0.00274041	0.460136	0.840855	2.37706	0.147536	0.0797445	0.00402306	0.781188	2941.76	20.4804	20.7755	494.523	6.39147	24.0321	1232.86	15.6327	43.5051	16.8104		2021-09-10 02:51:49.316	2021-09-10 02:51:49.316	25.058	1326.15	95.2698	102.687	Below LOD	1134.69	1915.89	1365.01	59.5892	2.3732	4.78196	1.22066	1.62203	1928.51	126.627	55.4762	18.0504	1.47932
DO1_1_70	big grain	4.61373	0.105577	9009.3	0.12694	361.622	3.7433	17.4142	0.919987	0.0966286	0.000544424	0.15173	0.666259	0.766796	0.0460379	0.0573833	0.0028789	0.967995	1558.43	9.84528	10.6448	359.656	4.46675	17.52	578.598	7.53723	27.5245	23.078		2021-09-10 02:53:07.608	2021-09-10 02:53:07.608	25.076	1476.54	100.035	105.928	Below LOD	1024.92	2010.74	769.243	45.1669	2.46536	21.799	3.7035	1.70666	1067.95	86.6106	58.9225	71.6221	4.6273
DO1_1_71	big grain	7.46388	0.158692	16312.7	0.607974	210.324	1.95676	19.0761	1.02721	0.12606	0.00245181	0.32488	1.88163	0.917129	0.0568069	0.0529231	0.00277818	0.562149	2033.86	33.7497	33.9563	332.367	6.47019	17.0162	659.514	10.7538	29.9966	16.3417		2021-09-10 02:56:37.550	2021-09-10 02:56:37.550	25.035	4320.23	265.622	115.76	Below LOD	1144.25	2148.95	2674.68	181.002	2.68191	27.3142	2.02973	1.83983	2310.16	185.345	67.3767	88.8968	5.70311
DO1_1_72	big grain	14.805	0.0898283	6359.68	0.62542	121.173	543.919	16.1473	0.823136	0.0671484	0.00152007	0.262224	1.87766	0.591113	0.0431985	0.0624543	0.0032672	0.900402	848.909	49.3733	49.5959	390.438	7.30095	19.8022	468.526	16.0811	26.3058	45.9929		2021-09-10 02:57:56.010	2021-09-10 02:57:56.010	25.037	1628.3	183.385	95.1196	3134.97	1227.98	1746.69	293.982	14.5929	2.21176	579.909	313.932	1.51372	232.3	41.8649	54.1533	32.5017	7.03983
DO1_1_73	big grain	13.4156	0.0358757	1004.63	1.08889	98.2279	5.74411	8.99427	0.495323	0.236487	0.00615163	0.5269	1.98741	3.64639	0.225957	0.112735	0.0070017	0.745311	3089.31	41.7489	41.8912	688.102	25.0206	40.2662	1558.16	17.2544	48.177	22.2736		2021-09-10 02:59:07.307	2021-09-10 02:59:07.307	11.367	519.749	92.7284	83.6709	Below LOD	924.129	1610.51	382.44	24.7886	1.96099	29.1101	3.72592	1.42674	215.975	44.3291	46.3084	7.18987	1.25382
DO1_1_74	big grain	1.3334	0.137581	15019.3	0.396956	1336.43	30.1869	22.9948	1.41498	0.0699892	0.001108	0.142475	2.91197	0.425559	0.0305067	0.0444752	0.00273589	0.943831	924.182	32.6893	32.9928	280.319	10.3062	16.8312	358.191	12.4454	21.0676	30.3316		2021-09-10 03:00:29.193	2021-09-10 03:00:29.193	25.026	2104.34	128.749	112.417	18152.5	5368.12	2044.62	1714.17	62.533	2.57464	69.8275	11.6869	1.83414	1501.54	111.357	59.8484	106.497	26.7316
DO1_1_76	big grain	1.6153	0.222903	22830.7	0.0696726	1107.45	44.9896	17.9009	1.35151	0.068911	0.00188991	0.064406	3.69532	0.570554	0.0471588	0.0597266	0.00428741	0.881897	881.298	54.5096	54.6767	373.301	19.128	26.015	452.95	21.7718	30.4888	42.3581		2021-09-10 03:03:06.217	2021-09-10 03:03:06.217	25.033	1200.98	103.919	111.849	Below LOD	1128.81	2077.99	1262.13	61.5286	2.54987	5.24555	1.34258	1.84088	255.467	38.8089	65.1725	28.2326	3.73722
DO1_1_77	big grain	5.70849	0.080066	8059.39	0.147503	283.561	3.98294	17.6413	0.90352	0.110863	0.00194625	0.184266	1.33387	0.866908	0.0529633	0.0568408	0.0028298	0.553314	1804.58	32.8099	33.0569	356.359	3.71787	17.2704	632.853	9.54678	29.181	19.7475		2021-09-10 03:04:20.309	2021-09-10 03:04:20.309	25.008	1725.12	156.038	128.778	3202.59	1657.67	2392.12	1000.77	53.4197	2.93704	77.2963	30.1566	2.12019	1495.9	290.52	74.9986	39.1166	3.19046
DO1_1_78	big grain	3.28713	0.0758224	5388.84	0.20695	499.366	23.8886	14.5029	0.717417	0.105093	0.00316336	0.186137	2.43159	1.00579	0.0687841	0.0692706	0.00352067	0.614912	1693.62	51.1755	51.3056	431.696	5.96001	21.2009	702.924	18.1539	34.1651	25.4895		2021-09-10 03:05:30.003	2021-09-10 03:05:30.003	25.018	832.592	72.1745	109.76	Below LOD	957.746	2050.28	568.453	27.897	2.51406	10.5289	1.56328	1.74305	306.613	49.2561	59.6867	13.4531	1.62207
DO1_1_79	big grain	7.12661	0.109425	8337	0.133075	220.286	3.71915	15.358	0.745067	0.126644	0.00349579	0.225007	2.30808	1.13792	0.0732264	0.0652737	0.00325765	0.252962	2033.59	46.2246	46.3645	407.587	4.12274	19.6942	768.911	14.9695	33.8607	20.0428		2021-09-10 03:06:39.566	2021-09-10 03:06:39.566	25.038	1607.32	99.1454	146.127	Below LOD	1039.77	2835.07	1979.58	83.2164	3.29905	7.40899	1.35722	2.52563	737.478	75.6726	80.0343	43.1586	2.67739
DO1_1_80	big grain	4.4987	0.189408	28147.5	1.0061	372.432	2.72211	28.2772	1.60163	0.0951325	0.00156928	0.296183	1.00942	0.473167	0.0317476	0.0361478	0.0020763	0.862243	1522.36	30.8624	31.126	228.824	6.87208	12.9078	391.967	10.9214	21.5865	15.0308		2021-09-10 03:07:57.948	2021-09-10 03:07:57.948	25.228	2707.79	139.467	122.138	15495.7	3003.31	2235.9	1259.41	48.2649	2.80899	43.0316	4.8063	2.01103	1949.19	130.293	67.251	272.857	26.6135
DO1_1_82	big grain	5.61385	0.0926795	6615	0.302955	287.382	3.90955	17.3565	0.927661	0.113138	0.00323447	0.231358	2.22582	0.888198	0.0556829	0.0581739	0.00307405	0.400246	1830.41	48.4836	48.6203	364.418	7.17642	18.727	646.104	12.1975	31.2005	19.909		2021-09-10 03:11:49.997	2021-09-10 03:11:49.997	25.008	1457.04	110.852	89.4524	Below LOD	877.801	1618.15	368.903	17.9227	2.03464	42.9228	10.9633	1.38867	293.542	54.4597	47.8736	24.8788	2.30955
DO1_1_83	big grain	4.98945	0.0874471	6905.5	0.144534	347.783	57.2962	17.9522	1.06159	0.0803142	0.00221457	0.12386	2.21262	0.647599	0.0528315	0.0570612	0.00333085	0.896633	1200.4	55.0398	55.2066	357.506	11.1053	20.3072	501.203	22.3214	31.7458	29.7823		2021-09-10 03:13:08.083	2021-09-10 03:13:08.083	25.004	1018.49	82.5611	96.3138	Below LOD	1197.82	1813.75	906.481	45.2401	2.19174	6.69351	1.05044	1.54912	1113.87	137.272	52.5413	35.1557	6.82669
DO1_1_84	big grain	6.91797	0.163865	16280.4	0.101984	230.144	2.33154	23.3939	1.194	0.118211	0.00192175	0.207138	1.69904	0.700491	0.0438822	0.0430486	0.00225699	0.673355	1923.34	27.6896	27.9331	271.662	5.1226	13.9385	538.159	9.80753	26.1256	14.1245		2021-09-10 03:14:26.648	2021-09-10 03:14:26.648	25.008	2008.72	117.328	126.948	3080.4	1393.52	2319.36	2381.35	141.925	2.83603	28.1881	2.36387	2.0445	2217.47	135.22	74.5555	178.763	10.466
DO1_1_85	big grain	5.66386	0.0474019	3404.37	0.869794	292.505	34.2658	15.9848	0.999741	0.100753	0.00329654	0.334557	1.67295	0.893706	0.0722469	0.0629597	0.00342988	0.926701	1617.77	60.6308	60.7612	393.442	9.30414	20.8102	640.193	26.3465	37.7348	24.3201		2021-09-10 03:15:45.201	2021-09-10 03:15:45.201	25.006	1765.06	233.486	112.285	Below LOD	999.719	2133.01	287.261	13.8957	2.54469	24.419	2.51986	1.81426	578.751	118.137	61.5981	16.5783	2.39883
DO1_1_86	big grain	-8.13222	0.0886495	7995.3	0.0968062	-215.722	312.088	18.1074	0.92985	0.0777748	0.00320442	0.0882553	4.73295	0.608189	0.0513212	0.0557365	0.00295346	0.972448	1090.9	80.2114	80.3201	349.559	6.86315	18.0156	476.255	23.0247	31.6884	32.0431		2021-09-10 03:16:59.185	2021-09-10 03:16:59.185	25.002	1254.44	98.3324	134.484	Below LOD	1191.07	2531.36	1722.3	81.027	3.19678	21.0545	2.41683	2.04056	1362.42	201.985	63.9924	38.2225	2.89575
DO1_1_87	big grain	2.57557	0.153817	10789.7	0.0522481	687.972	21.7395	13.5345	0.887246	0.071487	0.00092602	0.0678279	2.35308	0.758718	0.0536623	0.0757539	0.00436863	0.894962	965.78	24.2307	24.5689	470.374	13.9593	26.2454	569.629	17.7614	31.0797	48.704		2021-09-10 03:18:17.622	2021-09-10 03:18:17.622	25.122	2018	77.6796	146.397	25132.9	7295.88	2741.88	966.519	44.1637	3.39106	4.39333	3.24566	2.42588	85.0405	42.4188	76.5821	37.4652	8.67472
DO1_1_88	big grain	2.51933	0.210318	20557.6	0.247113	691.932	4.89983	23.0052	1.25786	0.0781933	0.00135491	0.117893	2.20735	0.475214	0.030457	0.0441796	0.00244827	0.718349	1147.53	36.5184	36.8009	278.593	7.21325	15.1025	393.847	8.95264	20.633	24.2777		2021-09-10 03:19:36.467	2021-09-10 03:19:36.467	25.063	1050.62	80.6542	118.762	7087.61	1791.32	2252.84	731.459	29.1961	2.68744	9.31126	2.0039	1.82931	477.819	64.8479	61.7447	108.516	19.293
DO1_1_89	big grain	5.66244	0.0851857	8381.14	0.10214	287.581	3.8754	19.0359	1.12558	0.106691	0.00180203	0.16947	2.31846	0.791765	0.0563543	0.0540114	0.00323322	0.837248	1735.81	29.6394	29.8807	338.865	11.4615	19.7505	588.526	17.5184	30.1287	19.522		2021-09-10 03:20:54.997	2021-09-10 03:20:54.997	25.01	1548.6	142.519	120.511	Below LOD	1151.04	2234.12	1403.99	65.363	2.77833	12.4734	1.84455	1.97266	1068.51	109.479	63.2973	32.5281	2.97061
DO1_1_91	big grain	6.13837	0.148998	11423.9	0.529753	261.476	2.93679	16.8903	0.919174	0.114844	0.00190002	0.278912	1.34301	0.940859	0.0571302	0.0595016	0.00302633	0.546104	1869.85	29.3007	29.5494	372.546	5.13656	18.4418	672.365	9.15886	29.6019	19.9239		2021-09-10 03:29:58.349	2021-09-10 03:29:58.349	25.013	2235.57	120.644	130.644	2655.88	1187.07	2454.84	1557.29	76.8336	2.98247	23.5756	2.7517	2.12198	1769.14	130.549	68.9398	135.157	14.3873
DO1_1_92	big grain	2.14556	0.0821097	8019.54	0.168559	817.344	23.0305	19.045	1.05237	0.0754691	0.000945458	0.111582	3.02287	0.550076	0.0334765	0.0529612	0.00283727	0.7073	1075.71	23.6909	24.0452	332.576	7.396	17.3965	444.474	7.02465	21.8437	30.9168		2021-09-10 03:31:12.680	2021-09-10 03:31:12.680	25.017	1286.87	111.147	122.197	Below LOD	974.397	2305.79	503.439	28.8584	2.84651	13.0712	2.18986	2.02597	706.417	80.0103	62.7397	24.9236	2.56552
DO1_1_93	big grain	8.9881	0.179451	13980.6	0.161385	169.509	1.26095	14.2979	0.713816	0.141552	0.00186145	0.276475	0.86193	1.37584	0.0856476	0.0704096	0.00361729	0.843539	2241.61	21.7322	22.0265	438.527	7.2486	21.7553	876.507	13.6844	36.9251	19.5631		2021-09-10 03:32:26.535	2021-09-10 03:32:26.535	25.028	2402.06	108.451	124.365	Below LOD	1599.24	2333.41	1332.27	74.3137	2.86531	7.01116	1.16176	2.0838	Below LOD	32.8187	67.5724	81.9857	6.24566
DO1_1_94	big grain	0.940695	0.0899557	6925.14	0.353618	1842.97	71.7893	15.4622	0.805286	0.0803315	0.00260573	0.191628	2.14113	0.72349	0.0518151	0.065201	0.00347781	0.606538	1187.43	59.7664	59.8971	407.038	8.76675	20.9986	552.413	18.3475	30.963	34.2789		2021-09-10 03:33:45.178	2021-09-10 03:33:45.178	25.01	839.729	79.1999	103.454	Below LOD	1063.07	1928.11	291.472	19.597	2.34574	8.26929	1.36484	1.73163	91.4097	31.987	58.0768	16.0015	2.22012
DO1_1_95	big grain	10.4265	0.0118805	686.118	0.845838	173.191	85.6193	17.6118	0.829163	0.0726815	0.0104122	0.353043	4.74082	0.572867	0.100259	0.0568552	0.0028913	0.977624	772.515	188.939	188.96	356.434	4.57476	17.5604	467.536	56.9133	60.3117	46.1394		2021-09-10 03:35:03.641	2021-09-10 03:35:03.641	25.004	441.469	57.6304	71.3413	Below LOD	551.103	1308.65	274.863	11.6044	1.64329	7.5977	1.45523	1.11782	Below LOD	17.9662	37.8563	0.834507	0.256947
DO1_1_96	big grain	3.34476	0.0151907	950.351	1.01915	486.02	109.427	18.5125	0.953508	0.116569	0.00774676	0.349069	3.57406	0.858197	0.0709875	0.0541987	0.0026826	-0.719933	1771.2	135.909	135.98	340.221	3.90268	16.4188	620.088	28.3401	39.7368	19.2084		2021-09-10 03:36:22.119	2021-09-10 03:36:22.119	25.006	618.234	91.6463	72.3931	Below LOD	577.166	1345.14	270.678	11.3917	1.66421	18.8432	2.83758	1.08599	Below LOD	20.1256	39.6559	2.66486	0.586297
DO1_1_98	big grain	-5.27378	0.175729	13337.4	0.134876	-351.094	308.693	13.1944	0.643015	0.0559719	0.000215238	0.0478059	0.350869	0.586497	0.0343165	0.0759805	0.00373266	0.97265	449.885	7.09646	8.54499	472.045	4.7244	22.3545	468.386	4.57244	21.897	104.926		2021-09-10 03:38:45.678	2021-09-10 03:38:45.678	25.039	2680.61	147.977	138.627	Below LOD	1025.77	2550.04	722.818	33.8349	3.20452		1.28016	2.06857	83.4221	46.6652	78.8226	26.6908	2.11925
DO1_1_99	big grain	2.28621	0.0727909	6265.1	0.104194	690.176	66.1105	16.0401	0.799586	0.122543	0.00219276	0.206935	1.61891	1.05401	0.0639765	0.0624018	0.00307577	0.536021	1985.03	31.0117	31.2363	390.205	2.36831	18.6685	729.698	10.0656	31.6543	19.6574		2021-09-10 03:39:50.625	2021-09-10 03:39:50.625	25.011	1219.44	93.2826	170.157	Below LOD	1427.34	3225.74	1224.47	71.403	3.728	5.36099	1.67194	2.82482	284.049	68.0183	90.9063	26.981	4.05206
DO1_1_100	big grain	3.14395	0.0697075	6128.54	0.0751766	547.032	20.544	15.3356	0.785851	0.0839305	0.000991962	0.107147	1.18618	0.774004	0.0550308	0.0664145	0.00376128	0.991154	1286.28	21.9547	22.3245	414.266	11.7381	22.6449	578.346	17.6613	30.1949	32.2066		2021-09-10 03:40:55.481	2021-09-10 03:40:55.481	25.008	1179.82	102.528	150.816	3946.92	1869.65	2721.46	634.393	42.1154	3.51852	5.03272	1.41277	2.33754	801.882	75.7139	83.6827	26.1535	2.89679
DO1_1_101	big grain	6.53328	0.176904	22467.1	0.775012	244.855	1.86678	22.9187	1.12271	0.115965	0.000762545	0.312394	0.296476	0.704662	0.0433463	0.0440359	0.00231835	0.949265	1893.14	11.1403	11.7832	277.744	5.59826	14.2878	540.661	8.87225	25.3974	14.6711		2021-09-10 03:42:00.227	2021-09-10 03:42:00.227	25.045	2541.6	156.071	130.663	2937	1551.36	2414.54	1162.97	66.2026	3.00497	227.575	96.9013	2.14969	2316.58	156.382	66.1233	166.351	8.51212
DO1_3_1	big grain	2.32546	0.0593404	6762.08	0.154162	752.69	38.4059	14.4805	0.848419	0.0771725	0.00194415	0.0990712	3.02293	0.726646	0.0492981	0.0706138	0.00443759	0.827098	1113.93	49.4938	49.6737	439.339	16.8625	26.6388	552.121	14.4524	27.6832	39.4406		2021-09-10 03:44:36.766	2021-09-10 03:44:36.766	24.834	1324.33	117.316	171.362	6461.68	1743.38	3247.46	531.238	32.3447	3.92523	18.4688	3.45706	2.91695	1088.04	158.732	88.6549	31.8461	3.04326
DO1_3_2	big grain	6.47961	0.0429386	7777.81	0.39196	243.88	71.3038	16.8457	0.969103	0.121365	0.00314969	0.236158	2.85319	0.9942	0.0788467	0.0588277	0.00339173	0.910463	1968.75	45.3535	45.5089	368.272	11.1174	20.6498	693.326	25.0318	36.5397	18.7058		2021-09-10 03:45:56.743	2021-09-10 03:45:56.743	24.712	1915.05	164.362	233.354	15242.5	3410.15	4209.06	1938.37	150.058	5.31244	16.2614	2.42604	3.7558	839.53	133.038	122.631	79.4812	9.70323
DO1_3_3	big grain	1.23229	0.100541	10021.1	0.171175	1427.81	87.614	13.9407	0.691781	0.0749234	0.000983494	0.213287	0.922204	0.744535	0.0456633	0.0720423	0.00363461	0.773757	1060.48	25.2698	25.6132	448.384	5.8516	21.8372	564.13	8.77555	26.2077	42.2813		2021-09-10 03:47:14.616	2021-09-10 03:47:14.616	25.778	2320.6	285.989	164.115	2956.81	1581.6	2915.24	470.365	36.0364	3.63839		1.55073	2.75004	126.269	47.2638	88.1886	216.452	40.0247
DO1_3_4	big grain	6.71118	0.0554236	3787.58	0.190036	224.314	13.6552	12.2178	0.619374	0.150945	0.00645519	0.289028	3.04679	1.74918	0.152984	0.0827289	0.00451946	0.93928	2320.96	74.6469	74.7407	512.175	12.2505	26.8192	1010.99	41.4366	55.2314	22.0674		2021-09-10 03:48:29.638	2021-09-10 03:48:29.638	19.93	736.844	88.1397	139.93	Below LOD	1511.88	2596.82	415.411	19.5431	3.17283	13.838	2.79173	2.18725	418.853	63.7424	78.5595	14.7334	2.54221
DO1_3_5	big grain	0.252474	0.0660639	9098.22	0.0835236	6987.25	75.3805	15.7526	0.832742	0.0738479	0.00164077	0.0854448	2.56802	0.647134	0.0448198	0.0636083	0.00331716	0.882426	1033.01	43.1403	43.3423	397.509	7.28847	20.1118	506.1	14.9745	27.2032	38.4805		2021-09-10 03:50:03.690	2021-09-10 03:50:03.690	6.145	1542.13	238.567	292.197	Below LOD	3539.97	5681.58	809.411	116.934	6.91956		5.25698	5.12276	344.601	174.65	160.872	9.01616	2.85825
DO1_3_6	big grain	2.55532	0.0648382	6231.77	0.0698113	668.059	18.307	16.0362	0.80006	0.0870634	0.00118512	0.107831	1.43988	0.750135	0.0440626	0.0627727	0.00322217	0.598655	1355.64	25.4616	25.7829	392.389	6.27669	19.5217	568.047	4.56407	25.6705	28.9449		2021-09-10 03:51:01.093	2021-09-10 03:51:01.093	26.78	1213.09	75.3846	137.081	Below LOD	1250.58	2668.91	1158.94	42.3813	3.19405	4.79771	1.38627	2.28013	546.812	64.3517	74.6875	14.1546	1.3214
DO1_3_7	big grain	10.2679	0.0723098	6645.95	0.550607	140.741	4.53368	13.8866	0.772271	0.177261	0.00865715	0.413137	3.16269	1.74777	0.149913	0.0719532	0.00379781	0.938936	2577.33	77.4509	77.5256	449.547	9.46538	24.354	1029.66	44.5202	60.2898	17.4424		2021-09-10 03:52:03.305	2021-09-10 03:52:03.305	24.681	2922.09	177.345	142.318	Below LOD	1647.57	2543.26	855.258	52.8059	3.22675	21.6408	2.92189	2.24732	410.542	58.7258	77.119	25.1614	2.52715
DO1_3_8	big grain	12.9812	0.0781172	6133.36	0.264575	106.885	2.46066	11.3889	0.597642	0.200884	0.0056986	0.431152	1.72408	2.45269	0.166721	0.0886476	0.00466963	0.54521	2813.32	49.7488	49.8913	547.329	10.6006	27.6298	1250.84	25.011	47.6331	19.4549		2021-09-10 03:53:16.839	2021-09-10 03:53:16.839	25.041	2096.93	171.881	142.744	Below LOD	1346.52	2573.94	1461.88	73.2042	3.26224	47.0023	5.32551	2.25502	418.871	66.7624	75.4387	24.3945	1.85812
DO1_3_9	big grain	3.62258	0.0608199	5591.44	0.0506054	472.288	29.1133	13.9527	0.737356	0.0853513	0.00143586	0.107075	2.65629	0.859597	0.0567689	0.072332	0.003798	0.788869	1315	31.1263	31.3817	450.056	8.56494	22.8275	627.337	14.8692	30.8292	34.2247		2021-09-10 03:54:35.443	2021-09-10 03:54:35.443	25.006	1404.39	107.991	136.581	Below LOD	1421.68	2515.36	1948.17	99.4379	3.14268	9.25857	1.52561	2.12547	552.492	95.3624	73.3762	22.6998	2.65028
DO1_3_10	big grain	17.145	0.0124487	592.939	0.887351	72.2573	10.5532	9.89537	0.534643	0.291762	0.0122859	0.772161	1.82698	4.28722	0.407258	0.10338	0.0060279	0.994384	3391.78	63.3102	63.3923	633.499	19.3624	35.0656	1649.3	58.9116	74.2552	18.6775		2021-09-10 03:55:49.290	2021-09-10 03:55:49.290	25.061	522.227	59.4776	106.514	Below LOD	872.922	1999.71	261.328	11.9657	2.48782	38.3127	6.8447	1.73956	568.979	155.111	57.2647	2.57404	0.532665
DO1_3_11	big grain	17.2395	0.0246896	1481.7	0.341426	71.0935	5.68154	10.4809	0.64544	0.299351	0.0155548	0.752344	3.01257	4.27701	0.553934	0.0969191	0.00672061	0.961783	3441.63	77.4966	77.5625	594.938	27.5841	38.6766	1652.6	86.5964	96.775	17.2865		2021-09-10 03:59:22.673	2021-09-10 03:59:22.673	25.009	2335.98	251.596	119.16	2273.92	1143.92	2245.01	305.334	13.3962	2.76945	24.5251	7.14619	1.74913	Below LOD	37.8108	64.7868	2.59551	0.524954
DO1_3_12	big grain	5.08808	0.0620854	6373.15	0.0622464	335.714	40.0735	15.0892	0.776822	0.0867332	0.00100539	0.120532	1.46532	0.799633	0.0557847	0.0667563	0.00375349	0.986246	1350.06	21.2482	21.6206	416.346	11.2768	22.4911	593.307	16.3544	29.253	30.8391		2021-09-10 04:00:40.846	2021-09-10 04:00:40.846	25.837	1096.06	121.06	155.58	3812.54	1801.02	2816.77	550.33	32.8936	3.47132	125.65	13.8495	2.4377	1593.53	152.302	87.1674	41.1492	5.14351
DO1_3_13	big grain	2.28535	0.0491891	3880.42	0.283326	763.898	64.1292	14.1958	0.677334	0.0786176	0.00216564	0.197273	2.29934	0.766832	0.0512347	0.0705405	0.00346005	0.773366	1140.39	51.7893	51.9466	439.391	3.29173	20.8143	575.513	14.3591	28.6222	38.5299		2021-09-10 04:02:00.352	2021-09-10 04:02:00.352	25.039	911.252	89.2214	118.214	Below LOD	1351.8	2107.3	275.328	14.4266	2.68051	16.432	4.60686	1.92057	Below LOD	33.4043	63.2061	9.60192	1.49424
DO1_3_14	big grain	0.339121	0.138862	16521.4	0.109479	5406.49	38.2524	19.0173	1.37342	0.0596007	0.000725514	0.0814914	2.96266	0.45864	0.04087	0.0558154	0.004555	0.985514	583.246	25.7841	26.193	353.572	23.5396	29.3216	382.232	21.5249	28.3033	60.6215		2021-09-10 04:03:14.447	2021-09-10 04:03:14.447	25.069	1870.02	131.076	128.928	4177.58	1568.96	2506.24	1342.67	78.2699	3.01785	215.648	82.5661	2.12561	1968.89	226.811	72.7556	45.0916	5.17088
DO1_3_15	big grain	5.32176	0.121699	13121.6	0.0786625	308.221	2.65511	17.1124	0.876122	0.104377	0.000923902	0.168419	0.62285	0.848119	0.0526901	0.0589616	0.00310185	0.908347	1703.18	16.7965	17.3112	369.216	7.12508	18.8614	622.382	10.3433	28.6053	21.678		2021-09-10 04:04:33.106	2021-09-10 04:04:33.106	25.007	1315.34	101.038	137.872	Below LOD	1369.13	2598.51	1237.47	62.8861	3.17105	17.3431	4.00052	2.16649	1258.92	127.593	73.9702	39.0332	4.25555
DO1_3_16	big grain	-3.70269	0.0541177	4396.92	0.0492742	-484.666	223.581	15.488	0.765693	0.0672611	0.000702971	0.0591732	2.19495	0.598819	0.035199	0.0646152	0.00317121	0.283737	845.056	22.0601	22.5386	403.623	2.23039	19.2056	476.304	3.96179	22.2428	47.7628		2021-09-10 04:05:47.203	2021-09-10 04:05:47.203	25.084	966.574	85.5326	115.886	Below LOD	1161.02	2182.18	354.626	17.0809	2.6808	3.2694	1.48852	1.80636	1257.9	269.519	60.2277	8.33525	1.3656
DO1_3_17	big grain	5.98376	0.0907357	8085.3	0.0575567	268.187	3.10935	15.74	0.803215	0.114877	0.00180988	0.195591	1.19874	1.02671	0.0715975	0.064384	0.00351699	0.967759	1871.12	27.4611	27.7186	402.065	9.61906	21.2474	712.851	19.516	35.0051	21.4879		2021-09-10 04:07:05.734	2021-09-10 04:07:05.734	25.01	1328.43	79.1425	125.166	Below LOD	1407.94	2417.06	1696.14	82.6862	2.92406	4.94911	1.13942	2.02246	747.505	88.8577	69.2586	35.2847	3.35103
DO1_3_18	big grain	6.52645	0.0835299	7750.71	0.130499	252.734	42.4282	15.3522	0.849879	0.102034	0.0022069	0.186036	2.38814	0.931736	0.062525	0.0659518	0.0035451	0.720022	1654.07	40.851	41.0528	411.571	9.08588	21.4493	665.454	16.3418	32.257	24.8824		2021-09-10 04:08:19.796	2021-09-10 04:08:19.796	25.055	1377.92	132.36	122.815	Below LOD	1381.68	2229.24	1150.12	83.1278	2.81277	26.7821	13.4194	2.02133	977.372	112.563	65.6017	26.7018	2.68736
DO1_3_20	big grain	-1.8844	0.0752111	10590.2	0.0986516	-977.646	135.964	17.6743	0.939137	0.057774	0.000327004	0.0442671	1.54084	0.453403	0.0277549	0.0569096	0.0029392	0.96981	519.426	11.5262	12.4527	356.751	5.99055	17.9377	379.286	6.32438	19.4444	68.6817		2021-09-10 04:11:02.280	2021-09-10 04:11:02.280	20.37	1612.26	138.583	187.424	Below LOD	1668.47	3547.88	1429.25	119.574	4.59226	177.896	31.3469	3.01849	1977.07	154.311	98.1473	57.3503	4.5921
DO1_3_21	big grain	5.85052	0.108874	16180.2	0.566206	275.576	3.6816	18.5523	1.04747	0.112572	0.0016949	0.362534	2.79744	0.843741	0.0554608	0.0542542	0.00289555	0.889336	1835.46	27.4603	27.7425	340.504	7.29932	17.7432	619.099	14.5679	30.676	18.5514		2021-09-10 04:13:24.437	2021-09-10 04:13:24.437	21.567	3656.73	229.425	197.5	Below LOD	1905.72	3729.16	662.534	33.036	4.64743	19.8948	3.45236	3.23305	1353.81	131.271	110.669	76.9157	6.73142
DO1_3_22	big grain	1.76502	0.113162	12712.9	0.465498	1010.23	49.59	18.6783	1.006	0.0697331	0.00118615	0.136745	2.67994	0.515551	0.0338681	0.0536253	0.00278054	0.91381	910.923	33.7703	34.0414	336.678	5.89106	16.9814	420.91	10.3941	21.9172	36.9601		2021-09-10 04:14:39.530	2021-09-10 04:14:39.530	25.039	2129.32	120.158	135.753	Below LOD	1491.08	2493.74	1173.97	60.7231	3.12586	22.588	3.09248	2.14239	1124.31	119.417	74.7183	24.2729	2.37567
DO1_3_23	big grain	6.79234	0.0806181	10095.2	0.6088	227.09	7.89263	18.9335	1.06301	0.13505	0.00414631	0.290102	2.51999	0.988822	0.0756285	0.0532358	0.00295562	0.85311	2177.01	51.8239	51.9505	334.22	8.699	18.0348	691.598	23.2496	35.5285	15.3522		2021-09-10 04:15:53.263	2021-09-10 04:15:53.263	25.006	2072.82	174.613	142.667	Below LOD	1402.46	2648.77	464.58	23.4915	3.28408	59.0278	37.0619	2.31305	1402.65	136.832	82.1577	49.9106	4.59512
DO1_3_24	big grain	3.67298	0.0585911	9265.18	0.281668	459.978	12.0802	19.197	0.973968	0.0912786	0.000900822	0.165195	3.71945	0.660004	0.041099	0.0524593	0.00274556	0.910444	1449.37	18.5257	18.9782	329.545	6.19974	16.7958	513.798	9.19107	24.8009	22.7371		2021-09-10 04:17:11.464	2021-09-10 04:17:11.464	20.969	2857.53	247.403	188.74	Below LOD	1548.8	3442.23	1047.44	57.1592	4.34281	5.45845	1.94274	3.08488	833.262	87.0594	107.34	56.1047	5.73362
DO1_3_25	big grain	4.7935	0.0404782	3901.39	0.367197	352.584	25.278	17.7206	0.985512	0.0918987	0.00243826	0.148542	1.90714	0.735215	0.0564375	0.0574001	0.00318441	0.914785	1446.11	47.3545	47.5097	359.634	9.34403	19.4052	554.354	20.9535	31.8615	24.869		2021-09-10 04:18:25.873	2021-09-10 04:18:25.873	25.392	628.749	67.4473	125.392	20642.6	4609.49	2331.28	544.487	36.0723	2.80795	23.8326	2.78507	1.96911	476.374	75.2532	64.696	64.3572	9.02143
DO1_3_26	big grain	6.87141	0.0754434	6398.4	0.173839	228.669	3.94056	14.9947	0.785778	0.125214	0.00154907	0.215995	0.903628	1.14848	0.0700891	0.0668519	0.00338023	0.826196	2027.24	22.099	22.438	417.105	5.62019	20.418	777.093	10.9934	34.4103	20.575		2021-09-10 04:19:40.208	2021-09-10 04:19:40.208	25.004	1551.73	132.437	129.117	3149.2	1306.82	2401.96	1309	130.115	2.93683	16.1477	2.56572	1.96721	1212.06	138.87	69.7648	56.7253	7.49771
DO1_3_28	big grain	9.73502	0.0940421	11670.7	1.28128	154.202	1.56209	19.1857	0.987289	0.149739	0.00163922	0.352647	0.572258	1.08679	0.0668001	0.0522208	0.0027329	0.901267	2339.42	18.663	19.031	328.073	6.18847	16.7735	745.497	11.374	33.621	14.0237		2021-09-10 04:22:04.020	2021-09-10 04:22:04.020	25.009	1186.04	114.109	149.38	9220.31	2720.87	2868.96	948.928	85.7304	3.51351	37.2823	7.09889	2.22107	858.866	116.372	83.8102	113.322	12.2297
DO1_3_29	big grain	8.13281	0.0716553	5831.88	0.0714094	194.872	40.0857	14.7115	0.732202	0.119645	0.00422024	0.199698	3.59562	1.13102	0.0885955	0.0685534	0.00359312	0.921316	1964.54	68.8738	69.0012	427.316	8.05366	21.6286	770.397	29.7759	44.154	21.7514		2021-09-10 04:23:18.211	2021-09-10 04:23:18.211	25.061	1136.52	100.552	144.077	Below LOD	1160.35	2591.37	1139.74	69.2938	3.43977	4.05713	1.35879	2.42341	1693.54	406.696	82.2366	20.1928	2.34445
DO1_3_30	big grain	7.56433	0.0711866	8011.43	0.0999625	202.776	6.10432	16.1521	0.785042	0.139494	0.00554922	0.248708	3.17441	1.20492	0.0973009	0.0622997	0.00329671	0.773307	2196.07	65.826	65.9217	389.52	7.8462	19.9437	796.002	29.0131	41.5768	17.7372		2021-09-10 04:24:44.770	2021-09-10 04:24:44.770	16.988	1377.4	109.559	219.292	Below LOD	1641.57	4144.05	1539.9	71.9262	5.33899	12.6332	4.28864	3.68691	783.755	101.375	127.156	35.1605	3.81306
DO1_3_31	big grain	5.05172	0.0533912	4989.04	0.168929	320.686	7.38224	15.059	0.735083	0.10981	0.00187961	0.180331	1.73538	1.01685	0.0648958	0.0666346	0.00334764	0.772218	1798.27	31.6664	31.9174	415.804	4.96896	20.2103	710.224	13.4403	31.7805	23.1224		2021-09-10 04:28:05.017	2021-09-10 04:28:05.017	25.034	1477.19	109.079	134.794	Below LOD	1438.34	2537.55	634.074	41.7652	3.12701	25.7186	2.44629	2.0842	1197.97	136.293	72.3374	24.7604	1.9492
DO1_3_34	big grain	4.38684	0.0890053	6001.92	0.138984	373.031	12.6548	14.4093	0.744182	0.105274	0.00327485	0.174514	2.93372	1.01079	0.0712032	0.069735	0.00356418	0.687653	1718.5	56.6249	56.7596	434.494	6.53401	21.4787	705.582	19.0211	33.3716	25.2833		2021-09-10 04:31:35.423	2021-09-10 04:31:35.423	21.182	1187.1	82.9424	117.338	2388.08	1237.95	2254.09	467.913	33.2473	2.71545	3.37625	1.38054	1.89064	247.95	56.6303	56.3669	37.4258	7.51374
DO1_3_36	big grain	7.79632	0.096775	11124.4	0.249633	198.7	2.19387	17.1988	0.960525	0.132894	0.00109338	0.265675	1.05714	1.07158	0.0662215	0.0587522	0.00315609	0.893368	2134.46	14.1337	14.6386	367.932	8.13797	19.2176	738.235	11.6264	33.0903	17.2377		2021-09-10 04:34:10.424	2021-09-10 04:34:10.424	20.797	1594.27	134.324	177.345	4138.46	1792.11	3418.83	972.106	66.307	3.99244	25.6165	3.25081	2.81694	2056.01	182.184	97.357	53.2191	4.97439
DO1_3_39	big grain	4.71784	0.0816677	7946.4	0.134246	349.134	8.91581	16.5535	0.807977	0.102396	0.000855241	0.162645	0.936583	0.85664	0.0517734	0.0606082	0.00304524	0.904812	1665.51	14.9792	15.4977	379.288	4.52832	18.4916	627.574	8.04642	28.1012	22.7731		2021-09-10 04:37:48.725	2021-09-10 04:37:48.725	23.97	1190.37	98.2926	180.476	Below LOD	1124.18	3299.96	692.85	34.5192	4.26555	5.19286	1.60875	2.96412	947.489	93.4434	93.1446	52.0542	4.57597
DO1_3_41	big grain	19.063	0.00590571	242.342	1.37589	59.6901	31.5263	9.44015	0.465014	0.364755	0.00408639	0.912878	0.530115	5.33785	0.320133	0.10604	0.00521032	0.816239	3766.74	16.7193	17.0336	649.678	4.11631	30.3678	1872.87	13.4379	51.126	17.2478		2021-09-10 04:41:25.713	2021-09-10 04:41:25.713	25.012	204.97	50.1065	93.2023	Below LOD	810.342	1788.57	259.959	13.6073	2.16073	8.94087	1.65815	1.44704	Below LOD	27.305	50.4751	0.704621	0.207928
DO1_3_43	big grain	-0.85101	0.0607848	6265.39	0.311951	-2121.45	85.9618	17.1403	0.869981	0.0650933	0.000445354	0.0837704	1.72686	0.529825	0.0337074	0.0589767	0.00316338	0.977406	775.099	13.6669	14.3909	369.286	8.16125	19.2216	430.761	9.23909	22.0716	47.6437		2021-09-10 04:43:59.803	2021-09-10 04:43:59.803	23.582	1121.91	151.765	136.313	4715.57	2324.17	2596.77	800.249	47.1845	3.15159	26.4221	3.09049	2.12363	2971.53	479.91	75.3097	38.8328	3.24954
DO1_3_45	big grain	0.935958	0.0785273	6592.41	0.272203	1908.43	49.3781	15.0233	0.726515	0.0691081	0.000694794	0.148735	2.56815	0.634316	0.0375412	0.066633	0.00326782	0.617925	897.911	20.4647	20.9456	415.825	2.70601	19.7399	498.507	4.87122	23.4509	46.3103		2021-09-10 04:46:26.591	2021-09-10 04:46:26.591	25.221	1130.79	106.927	126.175	Below LOD	1468.3	2388.59	529.384	37.509	3.00502		1.01834	2.10141	378.114	78.0567	67.6535	10.9992	1.68615
DO1_3_47	big grain	9.81844	0.0864577	7286.99	0.421702	151.788	2.10852	15.5975	0.879069	0.154352	0.00290169	0.318575	0.999299	1.4208	0.112691	0.0660183	0.00402422	0.975326	2386.13	30.9018	31.1045	411.735	14.652	24.2527	886.384	30.9876	45.2464	17.2553		2021-09-10 04:48:50.236	2021-09-10 04:48:50.236	25.01	1332.52	104.46	122.361	Below LOD	1302.12	2373.17	1071.18	56.4158	2.88425	137.897	32.1776	2.01359	909.055	122.994	66.2748	32.3033	3.35538
DO1_3_48	big grain	1.10531	0.156194	15784	0.287489	1670.86	50.8818	14.9006	0.705499	0.056889	0.000228349	0.0732979	0.607352	0.531771	0.0335135	0.0678727	0.0036623	0.992071	485.833	7.47336	8.83791	423.16	9.59378	21.9946	432.113	8.64682	21.6063	87.0999		2021-09-10 04:50:04.464	2021-09-10 04:50:04.464	25.014	2386.5	178.216	144.457	Below LOD	1483.83	2725.76	647.073	46.5927	3.33624	6.63788	1.60683	2.413	496.769	72.445	76.9538	8.89907	0.94336
DO1_3_49	big grain	-0.582481	0.131955	11978.2	0.533536	-3166.22	59.2887	14.6566	0.653113	0.0573815	0.000246064	0.0900123	0.415137	0.538216	0.0318919	0.0681422	0.00339446	0.967394	504.787	8.15313	9.41216	424.917	4.67649	20.4865	437.007	4.75747	20.9435	84.1774		2021-09-10 04:51:20.288	2021-09-10 04:51:20.288	23.069	1649.65	119.729	138.381	Below LOD	1705.21	2719.23	441.084	26.2195	3.24084	129.089	14.2033	2.17189	Below LOD	44.3158	77.0256	69.1531	6.26668
DO1_3_50	big grain	1.22757	0.0729633	11257.9	0.500755	1464.58	43.2694	21.7695	1.74145	0.0665472	0.00125083	0.118954	5.15436	0.45717	0.0372165	0.0494549	0.0035513	0.940477	823.853	41.5043	41.7766	310.704	16.0669	21.8296	378.358	18.5137	26.2986	37.7135		2021-09-10 04:52:23.366	2021-09-10 04:52:23.366	25.044	1102.2	125.514	129.346	Below LOD	1433.83	2539.64	626.573	41.8281	3.02866	37.2058	5.14339	2.02522	529.911	74.0144	71.852	25.5683	3.00519
DO1_3_51	big grain	6.75421	0.0686766	4725.04	0.134611	232.059	4.99546	13.8278	0.699113	0.126779	0.00226657	0.280954	1.36999	1.27415	0.0826638	0.0727986	0.00374973	0.848438	2045.12	31.6942	31.9242	452.894	7.44069	22.5143	831.013	16.8416	37.113	22.1452		2021-09-10 04:55:48.185	2021-09-10 04:55:48.185	25.006	2014.21	122.415	114.506	Below LOD	1304.33	2186.7	1585.37	70.117	2.69448	2.12491	0.980439	1.82751	98.9604	33.511	64.5274	25.1137	2.74673
DO1_3_52	big grain	6.13121	0.0778678	5331.41	0.410035	258.378	5.95756	13.0188	0.640392	0.119955	0.00266243	0.238397	1.91044	1.27711	0.0831541	0.0770837	0.00386818	0.621476	1950.75	39.1268	39.3104	478.632	5.70936	23.1302	832.502	15.9198	34.6606	24.5358		2021-09-10 04:56:57.673	2021-09-10 04:56:57.673	25.014	1302.35	109.081	113.352	Below LOD	1000.14	2228.19	279.396	15.6113	2.65161	24.1957	4.55009	1.76064	178.577	35.8361	60.9976	9.43423	1.62387
DO1_3_54	big grain	-3.65991	0.0571443	6105.01	0.0741625	-493.599	127.302	15.0677	0.741606	0.0646028	0.000744524	0.0484443	2.69175	0.592572	0.0351958	0.0664775	0.00329959	0.450643	757.51	22.9404	23.3475	414.878	3.95978	19.9349	472.291	5.0451	22.1601	54.7686		2021-09-10 04:59:27.676	2021-09-10 04:59:27.676	18.473	1377.83	116.133	185.646	4419.53	2099.95	3609.3	1541.89	100.661	4.3244	7.3951	1.75595	2.79864	1145.36	130.183	105.26	20.8964	2.47169
DO1_3_55	big grain	7.23612	0.0563327	4038.8	0.0699809	220.67	33.1598	13.1211	0.779707	0.121461	0.00642771	0.207343	4.38862	1.39432	0.157181	0.0794554	0.00523862	0.971372	1908.77	92.5763	92.6522	492.073	20.9964	31.1043	852.07	53.7554	62.6271	25.7796		2021-09-10 05:00:30.647	2021-09-10 05:00:30.647	25.004	778.95	80.7462	124.584	Below LOD	1273.39	2453.58	543.221	34.6541	2.89538	20.2059	2.86598	2.12228	445.202	59.6412	69.9554	25.1284	3.3393
DO1_3_56	big grain	9.64536	0.0631317	3649.17	0.0833255	145.82	8.99757	12.1099	0.725983	0.201101	0.0117867	0.411482	3.77265	2.45139	0.251037	0.0846767	0.00486415	0.983773	2736.39	110.602	110.676	523.505	15.3844	28.9201	1208.22	63.6564	77.1397	19.1312		2021-09-10 05:01:37.325	2021-09-10 05:01:37.325	27.67	859.168	65.9492	103.96	12752.3	2405.16	1964.09	1150.6	112.031	2.46021	5.34523	0.985043	1.7661	1037.76	212.866	58.2004	41.865	5.25374
DO1_3_57	big grain	1.6072	0.0651259	6926.35	0.146071	1109.63	90.4715	16.4921	0.832111	0.0696292	0.000464158	0.069552	0.987464	0.581548	0.0340985	0.0607155	0.00299495	0.773633	915.478	12.9212	13.645	379.962	3.02983	18.2121	465.331	3.61924	21.8925	41.5042		2021-09-10 05:02:58.057	2021-09-10 05:02:58.057	20.511	1342.79	117.594	157.118	4769.45	1655.15	3090.25	1613.91	105.789	3.71617	5.3221	1.6219	2.46288	1015.32	223.777	86.8839	26.2744	3.65669
DO1_3_58	big grain	2.47019	0.0764118	7895.7	0.427903	685.398	26.7729	16.7149	0.944848	0.0898581	0.00194569	0.210119	3.62997	0.753153	0.0450928	0.0606369	0.0032714	0.351664	1430.56	44.4816	44.701	379.362	8.61454	19.9011	569.522	6.76949	26.1079	26.5185		2021-09-10 05:04:02.970	2021-09-10 05:04:02.970	25.004	1194.19	121.693	138.996	Below LOD	1341.05	2613.15	505.798	21.5164	3.33823	32.3888	4.22946	2.2751	742.204	96.6411	76.7176	32.0394	3.21209
DO1_3_59	big grain	3.13309	0.220097	28967.5	0.179408	545.583	4.49331	20.5442	1.29319	0.0849369	0.00325818	0.166379	4.47547	0.582805	0.0528243	0.0492092	0.00297214	0.909356	1280.9	61.0227	61.1181	309.455	10.7844	18.1865	459.56	23.3834	30.37	24.1592		2021-09-10 05:05:07.688	2021-09-10 05:05:07.688	25.005	2670.6	202.941	136.645	Below LOD	1597.33	2612.94	1252.14	68.0978	3.35714	99.5773	35.9349	2.12016	2393.7	194.377	74.3592	66.7721	5.35992
DO1_3_60	big grain	6.65615	0.0709425	5507.37	0.180972	235.906	12.8713	13.7681	0.611439	0.123095	0.00454956	0.245181	4.19332	1.30719	0.15238	0.0754647	0.00548188	0.97238	1974.89	53.616	53.7063	467.97	23.5699	31.7307	824.92	40.9676	47.1839	23.696		2021-09-10 05:06:12.418	2021-09-10 05:06:12.418	25.009	963.861	100.759	134.16	Below LOD	1059.06	2567.49	495.725	27.9123	3.29721	2.9553	1.23156	2.08159	251.472	53.4	72.9972	19.0174	2.19591
DO1_3_62	big grain	-0.162645	0.0990396	6958.58	0.0560147	-10944.5	104.066	14.976	0.770336	0.0718392	0.00293091	0.075202	6.49894	0.661786	0.0491683	0.0669826	0.0033535	0.611896	936.099	71.994	72.0934	417.912	4.56414	20.2716	511.88	17.5954	28.0815	44.644		2021-09-10 05:14:05.505	2021-09-10 05:14:05.505	25.844	1196.55	82.8468	97.8769	Below LOD	1053.57	1898.57	496.332	29.4016	2.34349	3.24322	1.04926	1.5764	459.655	75.1258	50.697	7.81269	1.07466
DO1_3_63	big grain	7.14296	0.0786599	7609.9	0.135781	219.502	3.01786	17.0023	0.861231	0.126199	0.00121306	0.237772	1.23428	1.03496	0.0659065	0.0590881	0.0030507	0.973492	2042.73	16.3337	16.7554	370.004	6.34471	18.534	719.26	13.5068	32.0564	18.1132		2021-09-10 05:15:20.349	2021-09-10 05:15:20.349	25.032	1093.94	86.9179	142.849	Below LOD	1189.92	2813.33	440.454	26.0192	3.44034	23.0376	2.04612	2.22816	700.99	77.4594	72.7514	56.2901	4.24754
DO1_3_65	big grain	7.30339	0.0814726	8513.09	0.457958	213.56	3.18508	16.562	0.904671	0.12905	0.00174166	0.298692	1.32811	1.09364	0.0753895	0.0610993	0.00337269	0.962528	2080.03	23.0047	23.3002	382.137	9.70567	20.4743	745.882	19.4388	35.6771	18.3717		2021-09-10 05:17:39.280	2021-09-10 05:17:39.280	25.022	1491.51	112.997	139.793	20978.4	5596.5	2744.01	574.301	34.8587	3.36935	24.0322	3.71702	2.19202	1530.05	264.486	72.3873	48.5887	6.43264
DO1_3_66	big grain	0.479035	0.402737	40534	0.136221	3771.3	48.2918	15.7145	1.17913	0.0655084	0.00193123	0.0849723	4.18524	0.616509	0.0575962	0.0673348	0.00475923	0.908713	767.132	58.5813	58.7366	419.402	20.8772	28.753	480.137	27.2602	34.7009	54.6715		2021-09-10 05:18:47.458	2021-09-10 05:18:47.458	21.58	1495.25	105.852	140.573	4502.97	2090.62	2759.27	1129.98	58.0998	3.39061	8.02284	1.66346	2.35468	1220.37	197.803	75.328	61.6415	15.0533
DO1_3_67	big grain	8.57175	0.0838791	7009.74	0.0822858	176.787	2.55999	14.5866	0.72711	0.144598	0.00204904	0.274715	1.18614	1.37671	0.0870435	0.0688339	0.00346235	0.943192	2277.55	24.2447	24.5268	429.072	5.49479	20.8726	876.42	15.1126	37.2028	18.8392		2021-09-10 05:20:02.888	2021-09-10 05:20:02.888	25.05	1463.36	93.8846	136.03	6107.09	1886.91	2611.9	1037.4	52.4051	3.23978	7.06921	1.389	2.10658	1056.53	112.536	75.8146	36.6356	3.68705
DO1_3_68	big grain	3.80558	0.150827	19360.1	0.433983	447.244	8.40612	20.1515	1.10377	0.0878961	0.000949503	0.219996	1.54098	0.60734	0.0396508	0.050138	0.0027185	0.944663	1379.57	20.6776	21.0966	315.269	7.3912	16.6698	482.296	12.0028	25.8482	22.8528		2021-09-10 05:21:12.208	2021-09-10 05:21:12.208	25.039	2627.02	193.613	182.907	Below LOD	1492.98	3714.94	1097.72	49.9299	4.38246	14.5981	1.95687	3.00099	2044.21	155.055	96.0407	78.211	6.38636
DO1_3_70	big grain	3.09804	0.119883	15125.8	0.342352	556.88	4.48808	20.7214	1.19307	0.0826143	0.000816466	0.166363	1.1025	0.554297	0.0348334	0.0487124	0.00263699	0.925217	1256.46	19.1241	19.5897	306.518	7.14666	16.2413	448.447	8.56991	21.8915	24.3955		2021-09-10 05:23:26.328	2021-09-10 05:23:26.328	25.132	1491.2	127.345	122.698	Below LOD	1198.69	2482.1	690.016	39.6487	2.9695	18.0259	3.48295	2.08	1287.78	128.897	61.6154	65.4375	7.7178
DO1_3_71	big grain	2.5802	0.0644162	5199.48	0.0695116	664.498	21.8016	14.5756	0.771362	0.0863633	0.00281397	0.109056	3.57636	0.81386	0.05345	0.0688712	0.00345915	0.20755	1315.32	62.4015	62.5368	429.303	5.18219	20.8863	602.396	13.6997	28.9043	32.6387		2021-09-10 05:26:50.033	2021-09-10 05:26:50.033	25.238	869.023	68.3669	113.346	7324.88	2882.71	2265.81	446.112	27.8831	2.70368	8.49293	2.1257	1.88397	261.75	61.3423	61.5424	19.7884	3.32606
DO1_3_72	big grain	12.347	0.0381131	2478.34	0.120966	107.752	6.90187	12.7529	0.979554	0.253675	0.0214789	0.571396	4.91577	3.06121	0.387689	0.0821939	0.00523116	0.890636	3039.99	146.835	146.882	508.472	20.1804	31.2804	1330.93	91.6238	102.989	16.7261		2021-09-10 05:28:04.210	2021-09-10 05:28:04.210	25.026	1949.24	172.046	101.873	Below LOD	1113.56	1972.59	481.087	50.5938	2.44383	19.7787	2.53763	1.62615	739.637	138.372	56.881	20.2999	5.88306
DO1_3_74	big grain	1.30782	0.13436	7937.79	0.0759447	1360.39	24.2684	9.54903	0.477132	0.0705179	0.000377187	0.072902	0.403233	1.02768	0.0640929	0.105854	0.00565836	0.976558	941.788	10.0562	10.9755	648.287	13.5912	32.8529	716.156	11.7099	31.45	68.8358		2021-09-10 05:30:27.872	2021-09-10 05:30:27.872	25.019	1538.65	130.692	128.874	Below LOD	1304.72	2571.87	563.914	34.184	3.14902	7.83378	1.38603	2.01964	992.707	105.029	69.7785	70.8578	42.4205
DO1_3_75	big grain	4.16901	0.0884321	9501.43	0.0894798	391.177	31.0884	19.206	0.985103	0.108371	0.00454379	0.184053	3.54182	0.777217	0.0545475	0.0525326	0.00275893	0.0804103	1745.93	81.0489	81.1549	329.979	6.33214	16.8817	580.422	17.1703	30.2902	18.8999		2021-09-10 05:31:37.259	2021-09-10 05:31:37.259	25.039	1268.02	121.046	124.925	2567.2	1991.83	2486.32	742.086	40.6996	2.99034	12.3413	2.14969	1.95767	1110.12	130.251	66.0669	51.1165	8.12533
DO1_3_76	big grain	7.2231	0.075938	7281.21	0.183617	215.792	3.18628	16.1171	0.871461	0.129387	0.00170682	0.247612	0.987565	1.12174	0.0734022	0.0628043	0.00337851	0.928207	2084.66	23.1158	23.4268	392.521	8.68559	20.4829	760.717	16.477	35.3654	18.829		2021-09-10 05:32:51.517	2021-09-10 05:32:51.517	25.045	1420.59	100.297	126.822	13599.4	3195.2	2555.77	590.91	40.1577	3.03713	17.032	2.05493	1.9926	608.318	75.2988	67.6055	85.1471	12.9026
DO1_3_77	big grain	4.19528	0.0482703	5279.87	0.151262	387.712	20.1188	15.6853	0.793155	0.108445	0.00209337	0.168654	1.77511	0.956111	0.0619806	0.0639219	0.00322215	0.835887	1766.65	34.6506	34.8659	399.402	5.16812	19.5221	679.768	14.351	31.6769	22.6079		2021-09-10 05:34:10.149	2021-09-10 05:34:10.149	15.885	1263.07	112.064	167.449	Below LOD	1783.05	3404.83	1725.66	132.012	4.02462	28.0839	4.81692	2.66952	1147.46	198.553	90.2724	17.8815	1.98936
DO1_3_78	big grain	74.2899	0.0741072	6547.85	0.0445059	23.1772	4852.83	15.2136	0.737281	0.0831253	0.000800485	0.0992216	1.132	0.757131	0.0468795	0.0660654	0.00337254	0.902236	1271.87	18.6101	19.0885	412.341	6.01587	20.3555	572.816	9.72847	27.5598	32.4202		2021-09-10 05:35:14.859	2021-09-10 05:35:14.859	25.014	1128.04	109.562	122.456	Below LOD	1420.73	2476.63	1028.52	54.4011	2.85737	7.7751	1.49586	1.88834	969.611	95.257	67.2029	23.0112	1.88002
DO1_3_79	big grain	8.80706	0.0825962	9573.35	0.178998	172.152	2.88776	17.143	0.967988	0.145639	0.00441761	0.275075	2.18028	1.19687	0.0894275	0.0591511	0.00321493	0.851099	2274.14	49.8341	49.9588	370.325	8.66176	19.5731	791.312	26.1661	41.3953	16.2842		2021-09-10 05:36:28.708	2021-09-10 05:36:28.708	25.008	2349.03	126.386	175.259	32313.9	3892.51	3464.63	1702.13	74.1985	4.42303	20.6947	2.68447	3.06292	1283.13	116.141	90.2627	219.395	22.3497
DO1_3_80	big grain	6.53338	0.0626078	5741.24	0.140464	240.005	4.67797	15.2917	0.854179	0.126392	0.00195159	0.232687	1.14901	1.15892	0.0789796	0.0664444	0.00367389	0.912103	2042.04	26.201	26.4569	414.5	10.4782	22.1884	777.368	18.5522	35.2203	20.2983		2021-09-10 05:37:38.224	2021-09-10 05:37:38.224	25.037	836.62	87.3304	122.637	Below LOD	1187.29	2521.03	378.662	21.9679	2.95109	12.8847	1.77285	1.97003	464.153	57.606	66.1379	21.0271	2.32561
DO1_3_81	big grain	6.01758	0.0798786	6632.47	0.0635983	264.566	6.20149	14.3686	0.765473	0.121061	0.00487596	0.209831	2.6722	1.18562	0.0956862	0.0701504	0.00364866	0.90811	1931.02	70.2902	70.3898	436.955	7.62905	21.9905	783.03	30.3372	43.5421	22.6281		2021-09-10 05:40:01.904	2021-09-10 05:40:01.904	25.323	1090.24	78.532	107.926	4865.99	1010.74	2155.31	709.837	46.8799	2.65022	4.82559	1.43197	1.76793	506.308	100.666	58.8759	38.8208	4.76843
DO1_3_83	big grain	7.97323	0.0538774	4472.29	0.202876	193.839	15.57	13.7161	0.70296	0.133866	0.00183287	0.251695	0.955318	1.35681	0.0867376	0.0734175	0.00380077	0.912426	2144.03	23.8276	24.1248	456.606	7.66808	22.8117	867.628	15.8455	37.4649	21.2966		2021-09-10 05:42:38.938	2021-09-10 05:42:38.938	25.017	807.887	87.5748	123.002	Below LOD	1204.29	2370.26	465.801	26.4761	2.96338	22.559	2.5603	1.86702	557.744	67.7784	63.8211	24.2236	3.87251
DO1_3_84	big grain	6.16494	0.0605409	4005.3	0.176731	251.702	9.865	12.8715	0.670645	0.138072	0.00808742	0.365442	3.14237	1.52881	0.14802	0.0784185	0.00413032	0.95836	2116.13	105.384	105.455	486.515	9.38009	24.6669	916.583	46.6071	58.1297	22.9908		2021-09-10 05:43:57.345	2021-09-10 05:43:57.345	25.05	873.007	84.3375	147.959	Below LOD	1229.24	2912.66	471.89	21.9732	3.3822		0.934839	2.54006	230.023	41.5829	78.3618	72.7335	10.1218
DO1_3_85	big grain	-8.72878	0.0531812	4692.2	0.030916	-211.888	349.27	15.2795	0.751786	0.0563817	0.00030684	0.0218843	1.08834	0.509316	0.0302195	0.0655859	0.00326355	0.931524	465.575	11.0401	12.0097	409.481	3.86647	19.7346	417.782	4.31826	20.2409	87.9516		2021-09-10 05:45:11.622	2021-09-10 05:45:11.622	24.306	1122.25	94.2158	121.931	Below LOD	1247.94	2346.75	1688.04	87.8286	2.88315	10.2108	1.7761	1.99583	163.991	34.0427	65.5137	17.4085	2.00866
DO1_3_86	big grain	10.3193	0.0797478	7252.79	0.0783184	142.854	2.27292	14.6429	0.75335	0.160061	0.00210783	0.324408	0.823242	1.5186	0.0946909	0.068604	0.00347303	0.854692	2455.16	22.8297	23.1379	427.68	5.71587	20.9584	935.544	14.3697	38.7099	17.4197		2021-09-10 05:46:30.509	2021-09-10 05:46:30.509	25.13	1299.1	112.559	140.736	Below LOD	1091.52	2790.24	575.889	31.1203	3.33911	23.1099	2.99297	2.21262	908.301	82.0107	75.047	52.1534	4.30994
DO1_3_87	big grain	18.5399	0.0142972	564.033	0.985858	60.232	17.8697	8.04076	0.658481	0.394657	0.0172619	1.06836	1.46915	7.67302	0.807428	0.134165	0.00969661	0.996689	3844	76.2933	76.3849	808.575	40.8881	55.2606	2108.47	90.7056	108.569	21.0347		2021-09-10 05:47:40.043	2021-09-10 05:47:40.043	25.007	616.217	99.9442	99.3275	Below LOD	866.367	2002.76	260.911	14.1805	2.36307	15.552	1.75434	1.61956	Below LOD	28.1429	51.7164	1.59278	0.351424
DO1_3_88	big grain	0.842131	0.0708222	6133.92	0.0898851	2089.23	84.3804	16.335	0.796376	0.0751108	0.00138095	0.0897583	1.96361	0.636191	0.0398259	0.0614201	0.00308108	0.697413	1060.88	35.4648	35.708	384.22	4.49759	18.6934	498.926	9.44323	24.775	36.2172		2021-09-10 05:48:58.594	2021-09-10 05:48:58.594	25.028	1286.56	107.929	110.556	Below LOD	1537.11	2195.9	481.915	25.7574	2.63736	9.49192	1.40174	1.79287	539.295	70.2865	59.7468	31.5027	3.70174
DO1_3_89	big grain	13.8669	0.0639673	4992.18	0.124002	97.7975	3.2992	11.7569	0.838286	0.220464	0.0108222	0.472438	2.90198	2.65808	0.321807	0.0869637	0.00638071	0.980304	2938.59	71.6649	71.7333	536.141	27.8478	37.1996	1329.63	80.7665	91.939	18.2448		2021-09-10 05:50:17.321	2021-09-10 05:50:17.321	25.009	3308.21	175.332	191.085	Below LOD	1314.01	3722.5	593.556	21.5056	4.39843	13.7796	2.5384	2.91668	233.044	67.4416	98.4697	23.7685	3.08785
DO1_3_90	big grain	26.2158	0.065986	5726.45	0.136883	69.6464	1090.32	16.3749	0.802122	0.0608551	0.000476188	0.0525959	2.02167	0.515245	0.0307846	0.0612827	0.00307527	0.8318	633.965	16.8883	17.5593	383.383	4.58756	18.6647	421.66	5.17979	20.64	60.4738		2021-09-10 05:51:31.287	2021-09-10 05:51:31.287	25.021	1397.59	129.416	137.469	Below LOD	1208.15	2949.12	908.803	59.6291	3.34313	27.3098	2.97744	2.17838	994.032	142.679	70.2568	19.5682	1.81488
DO1_3_91	big grain	3.84415	0.202505	11879	0.144033	439.893	3.86106	11.5432	0.77956	0.0916495	0.00285549	0.130051	2.69894	1.13428	0.0949419	0.0890761	0.00563554	0.888476	1441.35	57.8628	58.0001	549.506	21.3334	33.3835	761.519	32.2991	44.6997	38.1244		2021-09-10 05:55:07.365	2021-09-10 05:55:07.365	17.088	1358.16	120.846	120.713	8363.68	2256.58	2424.78	1405.69	98.0945	2.87151	29.351	4.19986	1.95741	957.678	172.787	65.8769	67.3424	10.2165
DO1_3_92	big grain	9.27607	0.100307	8780.26	0.148617	160.982	2.59249	15.501	0.835045	0.153879	0.00412905	0.293357	1.70879	1.39277	0.100115	0.0651742	0.00344314	0.851579	2373.42	42.7308	42.8676	406.895	8.19362	20.8385	878.817	24.6096	41.3764	17.1438		2021-09-10 05:56:23.369	2021-09-10 05:56:23.369	25.021	1855.97	146.726	121.174	13890.7	3028.41	2362.5	2018.23	105.154	2.9137	12.9737	2.66777	1.97121	1195.37	112.87	63.6509	77.4955	8.0352
DO1_3_94	big grain	-3.47077	0.10956	9115.14	0.132564	-528.767	278.44	15.2104	0.762067	0.0590385	0.000392537	0.056839	2.42377	0.539066	0.0326212	0.0660084	0.00331849	0.930291	566.166	13.5801	14.3442	412.013	5.22155	20.0606	437.329	6.42549	21.4199	72.7724		2021-09-10 05:57:41.552	2021-09-10 05:57:41.552	25.003	1334.36	86.4599	131.015	Below LOD	1103.38	2633.95	1101.74	51.317	3.20009	28.7051	4.46805	2.07582	Below LOD	34.094	73.8405	8.21726	1.63031
DO1_3_93	big grain	20.5707	0.0710433	5707.98	0.283335	58.2171	2.20374	12.2997	0.736388	0.319536	0.00968051	0.740282	1.56065	3.7005	0.290827	0.0825546	0.00463737	0.969196	3546.52	51.0902	51.2184	511.006	13.8685	27.6825	1548.33	46.4215	68.5437	14.4087		2021-09-10 05:58:55.269	2021-09-10 05:58:55.269	25.02	2514.41	150.711	151.526	Below LOD	1740.48	2931.29	526.203	24.0826	3.6658	29.4002	2.79243	2.49089	956.879	146.949	81.0659	34.2101	4.8528
DO1_3_95	big grain	0.808174	0.0885179	7051.94	0.237697	2244.16	55.7203	13.7717	0.696942	0.063453	0.000567172	0.112501	1.72219	0.638639	0.0385596	0.0729875	0.0037054	0.863633	720.022	18.1062	18.6496	454.052	6.50339	22.251	500.904	6.93078	23.6558	63.0609		2021-09-10 06:00:04.609	2021-09-10 06:00:04.609	25.007	933.647	96.4929	121.537	Below LOD	1345.28	2419.92	849.424	48.4296	2.93886		0.876316	2.08071	325.56	56.9998	61.3141	29.8033	3.5161
DO1_3_96	big grain	2.3037	0.0751193	8383.87	0.493505	739.376	55.9202	20.01	1.16427	0.0894	0.00591658	0.211882	5.63045	0.63467	0.0729629	0.0514845	0.00313019	0.829628	1376.11	108.075	108.132	323.39	11.5044	19.1522	511.134	41.3564	47.846	23.5003		2021-09-10 06:01:18.296	2021-09-10 06:01:18.296	25.011	1624.67	134.587	152.344	Below LOD	1449.61	3002.46	396.179	31.069	3.71196	20.2282	3.8007	2.54034	461.743	70.9842	81.0019	49.3692	7.82073
DO1_3_97	big grain	2.32302	0.149029	11405.1	0.144462	748.464	5.00711	14.3009	0.720974	0.079701	0.00129349	0.113186	1.34976	0.763452	0.0456551	0.0703421	0.00360598	0.533346	1180.87	32.4398	32.7262	438.132	6.83005	21.6952	575.511	6.52125	26.1509	37.1024		2021-09-10 06:02:27.760	2021-09-10 06:02:27.760	25.014	1598	196.225	116.121	Below LOD	1218.1	2340.51	1077.13	56.5604	2.87704	4.61062	1.43515	2.01904	725.052	81.8025	60.4171	24.9841	2.84156
DO1_3_98	big grain	11.6474	0.051886	2797.64	0.570618	120.327	5.12559	11.394	0.539855	0.199311	0.0105789	0.417278	3.51333	2.48088	0.230216	0.0884089	0.00460421	0.962875	2756.67	88.59	88.6623	545.951	9.63679	27.1481	1236.84	49.8595	63.773	19.8047		2021-09-10 06:03:46.552	2021-09-10 06:03:46.552	25.032	942.451	71.0125	96.286	Below LOD	1117.73	1896.04	1312.88	78.6334	2.29123	13.8599	2.00064	1.62769	425.544	199.774	50.4102	9.55723	1.5192
DO2_13_1	small grain	2.45086	0.0838683	6935.22	0.119987	712.751	16.5258	16.3221	0.782943	0.0774958	0.000539543	0.0857949	0.940215	0.654424	0.0383301	0.06127	0.00300899	0.68644	1131.79	13.0029	13.6661	383.332	2.65435	18.2873	511.038	3.73269	23.505	33.8695		2021-09-10 06:06:18.923	2021-09-10 06:06:18.923	25.013	1320.84	101.911	113.603	Below LOD	978.306	2241.56	1096.57	50.5826	2.74102	7.38863	1.79783	1.86628	878.707	128.258	53.6709	38.562	3.13068
DO2_13_2	small grain	2.58593	0.0617773	5284.02	0.184309	648.568	56.4443	15.2783	0.721204	0.0942438	0.000645666	0.148428	0.870252	0.857102	0.0524043	0.0657956	0.00336017	0.945861	1511.01	12.1697	12.8121	410.707	6.19062	20.2695	627.576	9.11709	28.0989	27.181		2021-09-10 06:07:28.343	2021-09-10 06:07:28.343	25.053	826.925	91.1443	107.334	Below LOD	1196.97	2079.25	441.578	27.5178	2.55343	16.4763	2.4419	1.98579	1614.71	193.304	56.0054	27.2736	3.07821
DO2_13_5	small grain	8.62049	0.100089	7358.64	0.38973	177.048	2.81371	14.3258	0.745262	0.141208	0.00311266	0.266688	1.75924	1.37249	0.0917788	0.0701539	0.00356302	0.895186	2229.79	38.0793	38.2604	437.015	6.12284	21.4759	872.739	19.8739	39.6629	19.5989		2021-09-10 06:11:20.747	2021-09-10 06:11:20.747	25.004	1369.03	94.0309	112	Below LOD	1188.95	2220.81	718.474	35.9287	2.75495	26.9912	3.44655	1.91177	903.684	70.0123	58.1071	34.2312	3.70374
DO2_13_6	small grain	3.14896	0.0977596	8713.91	0.1682	516.505	22.1203	17.5178	1.23924	0.11329	0.00851095	0.223168	5.93701	0.934168	0.130053	0.0590852	0.00427998	0.933456	1767.15	121.704	121.754	369.393	19.0537	25.7165	648.821	53.5897	58.9171	20.9033		2021-09-10 06:12:37.832	2021-09-10 06:12:37.832	25.038	1110.42	81.6271	146.653	Below LOD	1261.1	2788.57	615.292	27.2676	3.54188	13.7882	2.23323	2.25936	399.409	60.1681	72.7414	37.2853	4.2637
DO2_13_7	small grain	5.92043	0.13405	11949.1	0.226175	270.573	6.01722	19.0317	1.0223	0.115876	0.00205574	0.204269	1.48759	0.849532	0.0556133	0.0532048	0.00286856	0.803829	1884.66	32.3244	32.5627	334.064	7.57592	17.5419	622.139	13.9015	29.6994	17.7254		2021-09-10 06:13:54.885	2021-09-10 06:13:54.885	25.021	2482.23	265.884	110.905	9025.37	2501.17	2289.84	1211.39	154.868	2.66054	66.0934	9.21298	1.86854	1156.04	165.265	56.3582	189.693	35.3546
DO2_13_8	small grain	2.9462	0.100525	9419.04	0.394142	575.73	21.7313	17.4459	0.86008	0.0907437	0.00291169	0.150513	2.65255	0.71943	0.0486018	0.0575311	0.00289515	0.409116	1413.89	57.5795	57.7083	360.558	4.45922	17.6311	547.881	14.5261	28.0981	25.5011		2021-09-10 06:15:11.951	2021-09-10 06:15:11.951	25.01	1489.15	106.244	115.441	Below LOD	983.962	2363.19	1236.09	62.6941	2.79375	16.3315	3.08718	1.95574	1124.33	93.1626	64.2323	35.1581	2.77184
DO2_13_9	small grain	3.06883	0.0627931	5632.58	0.464644	584.836	164.592	17.6411	0.886432	0.0673666	0.000800031	0.0806379	2.40227	0.527655	0.0324164	0.0568108	0.0028759	0.839708	843.825	24.2298	24.634	356.159	4.8295	17.5601	429.658	7.20114	21.5	42.2076		2021-09-10 06:16:24.754	2021-09-10 06:16:24.754	25.017	864.497	79.0281	119.133	Below LOD	1008.24	2447.13	465.395	25.1315	2.90316	15.5156	2.40314	1.98273	534.884	88.071	61.7078	36.1113	3.91358
DO2_13_10	small grain	27.7378	0.0968392	3723.2	0.433057	37.5	1.83536	8.34167	0.544393	0.465593	0.0154742	1.10433	1.66955	8.23821	0.849294	0.124934	0.00879883	0.996194	4120.02	48.8108	48.9125	757.14	36.1585	50.0143	2210.52	73.3302	88.5961	18.3771		2021-09-10 06:17:41.862	2021-09-10 06:17:41.862	18.497	1731.42	137.154	117.159	Below LOD	1306.49	2283.95	327.964	19.0068	2.79625	38.5066	4.16159	1.89192	665.724	100.615	58.8023	19.9159	2.52136
DO2_13_11	small grain	6.94075	0.0848649	6551.55	0.117746	225.803	3.23655	14.7759	0.719119	0.127	0.00268961	0.21942	1.89016	1.19025	0.0766757	0.06788	0.00339131	0.702612	2045.74	35.2875	35.4694	423.331	4.67426	20.4527	793.393	15.0145	34.07	20.6933		2021-09-10 06:21:09.137	2021-09-10 06:21:09.137	25.186	1352.17	108.665	110.978	Below LOD	864.041	2236.23	1837.11	90.3628	2.57891	15.4738	2.41556	1.81843	582.933	76.9751	58.5082	29.4821	3.02177
DO2_13_12	small grain	27.3967	0.0524183	1562.53	0.517202	38.2254	2.78833	7.98858	0.629046	0.463818	0.0231298	1.12997	2.59988	8.91042	1.06622	0.133093	0.0101941	0.986544	4094.67	75.2944	75.3639	802.851	44.6855	57.8419	2250	98.1357	112.101	19.6072		2021-09-10 06:22:26.098	2021-09-10 06:22:26.098	18.158	415.425	67.0056	89.971	Below LOD	874.943	1777.87	302.849	17.0678	2.15937	16.8534	3.06032	1.52947	877.885	217.457	48.7608	8.23605	1.32002
DO2_13_13	small grain	9.8017	0.0827311	7122.33	1.72948	152.597	2.32853	14.3774	0.719316	0.152474	0.00363016	0.373219	1.3184	1.48081	0.10584	0.0699876	0.00365573	0.956094	2362.98	40.342	40.5063	435.991	7.99879	21.984	917.043	24.7261	42.0972	18.4509		2021-09-10 06:23:44.889	2021-09-10 06:23:44.889	19.287	1189.72	83.2173	184.542	Below LOD	1637.55	3774.42	462.675	20.4666	4.35805	115.968	19.6313	2.92657	781.682	80.2189	104.068	49.7399	5.0558
DO2_13_14	small grain	7.45364	0.0648136	5616.84	0.806744	207.026	5.30173	14.8844	0.766624	0.133489	0.00296156	0.26862	1.70232	1.26757	0.0968703	0.0682283	0.00378369	0.921927	2139.69	37.5472	37.7235	425.255	10.9172	22.7578	823.14	25.7466	39.4005	19.8746		2021-09-10 06:24:51.980	2021-09-10 06:24:51.980	25.034	1421.2	131.903	121.515	Below LOD	949.167	2429.15	561.338	42.5776	2.92809	31.3741	2.22969	2.08734	692.368	89.5744	62.4849	26.7402	2.67419
DO2_13_15	small grain	12.7208	0.070828	5281.01	0.170775	141.727	342.812	14.9603	0.727104	0.0655879	0.000372961	0.059294	0.751016	0.605993	0.0358004	0.0669971	0.00332992	0.902626	791.397	11.109	11.9926	418.009	4.06157	20.1016	480.79	4.57895	22.6427	52.8192		2021-09-10 06:26:04.971	2021-09-10 06:26:04.971	25.008	1236.6	67.0364	114.145	11799.3	2057.59	2286.94	1341.75	73.9361	2.65829	3.67574	1.306	1.84286	3143.37	282.081	55.3771	32.4545	3.79528
DO2_13_16	small grain	2.17256	0.0947604	7982.52	0.299338	787.266	26.7338	16.6862	0.826334	0.0858426	0.00100332	0.126349	1.35619	0.708637	0.0423214	0.0598839	0.0030031	0.663488	1333.9	22.5475	22.9361	374.884	4.43376	18.2666	543.5	6.1305	24.642	28.1042		2021-09-10 06:27:09.408	2021-09-10 06:27:09.408	25.022	2112.73	116.868	106.219	Below LOD	799.773	2134.46	1268.93	61.9909	2.50567	10.0462	1.51561	1.83604	722.462	88.0215	54.502	32.6167	2.55009
DO2_13_17	small grain	16.7203	0.273609	16381.2	0.247689	77.931	0.313812	14.0686	0.712664	0.244188	0.000824942	0.545428	0.0867368	2.40165	0.14203	0.0712798	0.0035535	0.981073	3147.27	3.96287	5.12567	443.822	4.67574	21.3904	1242.21	8.805	42.4466	14.1018		2021-09-10 06:28:26.371	2021-09-10 06:28:26.371	25.04	1592.44	97.5375	91.9242	Below LOD	988.559	1778.99	1197.7	57.394	2.26322	3.34745	1.07431	1.50789	1631.9	99.7438	49.0116	238.872	13.8148
DO2_13_18	small grain	21.579	0.0756134	4612.45	0.268098	80.5623	548.549	14.5996	0.652155	0.0777721	0.00200929	0.110362	5.30192	0.756797	0.0616025	0.0689227	0.00356765	0.970349	1124.76	42.3332	42.4795	429.566	7.30609	21.38	560.464	17.3375	24.6425	38.1918		2021-09-10 06:29:39.217	2021-09-10 06:29:39.217	25.046	857.732	67.4241	102.756	Below LOD	908.592	2040.46	429.058	21.0049	2.46268	2.90122	0.935027	1.71341	127.487	28.7035	53.2947	9.79179	1.46159
DO2_13_19	small grain	14.3663	0.144057	5047.96	0.823311	92.2418	5.20954	8.41377	0.784487	0.241329	0.0133933	0.570178	3.18265	5.09728	0.767021	0.140088	0.0147042	0.987542	3060.51	99.3344	99.4085	836.446	72.2216	81.5009	1695.58	115.583	125.201	27.3303		2021-09-10 06:30:56.346	2021-09-10 06:30:56.346	22.672	1001.23	89.5437	116.078	Below LOD	1080.69	2333.98	476.261	25.0729	2.77906	10.4921	1.62718	1.81317	599.768	66.5473	60.5066	25.2728	2.82249
DO2_13_20	small grain	-2.22565	0.183316	14468.4	1.24479	-832.652	377.607	17.3498	0.983503	0.0556961	0.000380182	0.14024	2.29833	0.449969	0.0285921	0.0585357	0.00320975	0.972853	437.748	14.4325	15.2004	366.566	9.0084	19.549	376.464	8.28578	20.0564	83.7392		2021-09-10 06:32:09.246	2021-09-10 06:32:09.246	25.065	1184.02	79.3716	107.793	Below LOD	984.378	2310.56	620.033	34.636	2.62775	5.7826	1.68184	1.71567	Below LOD	27.7471	56.3844	2.26206	0.491946
DO2_13_21	small grain	1.20063	0.0683491	6320.29	0.286494	1529.82	81.6972	18.0888	0.889307	0.058021	0.000672089	0.0460473	4.04948	0.447887	0.0278357	0.0553947	0.0028002	0.61588	525.427	23.0734	23.4784	347.519	4.5972	17.0649	375.226	6.98138	19.0608	66.1403		2021-09-10 06:34:32.063	2021-09-10 06:34:32.063	25.148	1102.62	75.7545	124.944	7462.52	1909.73	2515.89	506.971	26.2131	2.93945	18.9213	2.74667	2.09281	807.568	89.2999	61.8181	46.6514	3.90216
DO2_13_22	small grain	4.25013	0.142019	13778.8	1.0493	398.548	2.65847	19.7607	1.051	0.090038	0.0007929	0.202214	2.25722	0.633056	0.037939	0.0509552	0.00262719	0.8541	1423.44	16.1334	16.6329	320.333	5.26959	16.1234	497.576	6.04878	23.7199	22.5041		2021-09-10 06:35:49.250	2021-09-10 06:35:49.250	25.045	1595.95	97.6801	121.363	Below LOD	1196.65	2385.96	861.299	40.3127	3.04091	24.7461	3.09222	2.03979	1484.95	104.292	64.2907	88.0334	6.29809
DO2_13_24	small grain	7.64781	0.0601764	4541.32	0.214513	204.104	3.07592	15.9009	0.791879	0.128608	0.00163839	0.22663	0.956297	1.11773	0.0671156	0.0629747	0.0031001	0.68074	2074.38	22.0517	22.3702	393.676	2.89991	18.8057	761.004	8.78172	32.1315	18.978		2021-09-10 06:38:23.582	2021-09-10 06:38:23.582	25.032	1363.4	72.2569	129.769	Below LOD	996.963	2642.51	518.496	20.6299	3.08151	16.206	1.74568	2.23957	1075.11	161.968	67.047	22.5811	1.87476
DO2_13_25	small grain	8.28293	0.0732338	4835.58	1.17769	184.557	3.7682	15.02	0.782649	0.141455	0.00470645	0.315433	2.06159	1.33451	0.107077	0.0673687	0.00361873	0.952308	2219.03	55.3074	55.4224	420.127	9.24904	21.8218	849.445	30.9578	44.6694	18.9329		2021-09-10 06:39:36.289	2021-09-10 06:39:36.289	25.002	1192.07	96.9536	94.6087	Below LOD	1292.52	1904.81	337.959	19.0326	2.22933	22.1378	3.00532	1.56946	268.145	53.9788	49.1336	20.6348	2.23482
DO2_13_26	small grain	10.1464	0.0958326	7571.91	0.31579	144.846	2.65508	14.6654	0.72156	0.164072	0.00523681	0.349029	2.06378	1.55009	0.107534	0.0683161	0.00343759	0.628711	2474.25	53.3734	53.494	425.952	5.3207	20.7517	944.204	23.4126	42.3272	17.2154		2021-09-10 06:40:53.168	2021-09-10 06:40:53.168	25.056	1559.82	116.55	115.62	Below LOD	1177.79	2312.47	548.077	39.0317	2.7818	9.35455	1.8345	1.80474	1798.53	202.376	61.6268	41.8185	4.06767
DO2_13_27	small grain	7.9679	0.0637411	4809.82	0.294527	195.956	8.22425	14.6485	0.733662	0.129042	0.00287988	0.233872	1.66464	1.22417	0.0802946	0.0686447	0.00351079	0.750721	2072.56	37.9189	38.0948	427.91	6.4439	21.1589	808.283	17.2018	36.4973	20.6465		2021-09-10 06:42:05.823	2021-09-10 06:42:05.823	25.015	871.399	90.7506	130.223	Below LOD	1236.21	2548.02	456.212	29.7663	3.10588	8.65416	1.6679	2.28612	275.107	57.9192	67.393	22.1649	2.84393
DO2_13_28	small grain	10.4187	0.093667	5084.35	0.385929	142.889	6.98497	12.4718	0.655645	0.155055	0.00886413	0.340418	3.7888	1.71623	0.159587	0.0802456	0.00415598	0.883664	2393.06	101.456	101.527	497.575	8.52584	24.8142	1011.83	48.0517	61.3708	20.7924		2021-09-10 06:43:10.229	2021-09-10 06:43:10.229	25.125	1234.02	113.425	132.283	Below LOD	1294.52	2524.74	538.738	39.0114	3.05249	3.62237	1.37325	2.165	686.738	89.2354	67.6404	31.7366	3.93662
DO2_13_29	small grain	6.87549	0.0606286	4399.25	0.383422	227.232	3.62303	13.7373	0.677457	0.126545	0.00186371	0.24063	1.6515	1.26732	0.0768257	0.0729881	0.00363854	0.603788	2050.08	27.3966	27.691	454.093	4.68643	21.8487	830.018	9.94595	33.1833	22.15		2021-09-10 06:44:19.155	2021-09-10 06:44:19.155	25.164	1292.69	101.895	107.437	Below LOD	1119.18	2100.88	378.628	18.781	2.61073	40.0915	3.09158	1.79556	3391.98	524.223	52.1343	21.2852	2.21481
DO2_13_30	small grain	9.86146	0.0759973	5321.61	0.13754	155.361	45.9927	14.5744	0.732468	0.150079	0.0123759	0.27959	5.79664	1.48464	0.181859	0.0694449	0.00375707	0.851133	2203.94	129.943	129.987	432.634	9.88237	22.563	883.135	57.4164	65.1337	19.63		2021-09-10 06:45:36.322	2021-09-10 06:45:36.322	25.033	1526.5	77.7503	107.827	Below LOD	1101.44	2150.86	1066.66	49.1779	2.57444	9.55308	1.55871	1.68469	224.174	42.8098	57.9766	17.3258	1.75809
DO2_13_31	small grain	0.941904	0.0963772	10668.1	0.437908	1857.04	51.458	20.4896	1.02996	0.0770958	0.00342606	0.209605	4.219	0.525117	0.0483534	0.0492748	0.00272679	0.947927	1078.9	69.623	69.704	309.952	7.94787	16.6531	422.553	21.763	27.9654	28.7284		2021-09-10 06:53:31.780	2021-09-10 06:53:31.780	25.153	1744.73	133.327	150.444	5263.55	1858.38	2997	791.474	39.3849	3.574	15.1474	1.6912	2.49107	1417.19	122.573	82.7868	47.501	4.27902
DO2_13_32	small grain	8.10329	0.149903	13567.2	0.0905955	192.24	1.17269	19.0325	0.990188	0.129146	0.000847517	0.264093	1.18615	0.945614	0.0586279	0.0529652	0.00275799	0.956423	2084.64	10.8965	11.5281	332.635	6.02912	16.8787	674.427	11.0191	30.6069	15.9565		2021-09-10 06:54:48.875	2021-09-10 06:54:48.875	25.111	1453.29	96.647	123.606	Below LOD	1196.51	2448.62	1014.6	58.9119	2.86507	10.2293	2.09742	1.97241	1745.03	131.646	60.5949	104.456	7.51467
DO2_13_33	small grain	-1.16831	0.0779433	4904.7	0.0391658	-1443.9	128.444	13.5914	0.683551	0.091762	0.00343807	0.138174	4.15043	0.949993	0.0716651	0.0738414	0.00370536	0.520399	1462.81	67.3443	67.4547	459.203	5.50769	22.2432	675.901	22.7013	35.3791	31.3918		2021-09-10 06:56:01.979	2021-09-10 06:56:01.979	25.015	1210.88	70.2314	114.887	Below LOD	993.285	2293.67	491.697	21.8214	2.73617	9.31758	1.4795	1.84224	4863.73	1320.66	59.4002	2.88109	0.530017
DO2_13_34	small grain	5.36423	0.0837924	5716.73	0.0765301	285.854	13.2251	14.2858	0.739623	0.148005	0.0097663	0.286332	4.42497	1.46608	0.142646	0.0705508	0.00366986	0.798849	2198.17	132.037	132.106	439.363	7.81971	22.0855	889.906	48.8068	60.7006	19.9877		2021-09-10 06:57:14.790	2021-09-10 06:57:14.790	25.003	1124.58	86.1943	116.093	Below LOD	997.237	2228.41	392.12	20.665	2.80493	11.334	1.82873	1.84646	446.294	78.2519	60.4947	14.272	1.31549
DO2_13_35	small grain	10.0509	0.0831073	9321.92	0.081915	146.967	2.13918	19.8231	1.4914	0.159447	0.00265132	0.322706	1.1774	1.15454	0.0796429	0.0531041	0.00346002	0.921433	2442.48	28.702	28.9432	333.188	14.1291	21.2272	774.48	20.6601	37.8667	13.6414		2021-09-10 06:58:31.737	2021-09-10 06:58:31.737	25.069	1254.56	113.33	127.66	Below LOD	1267.99	2556.2	511.06	30.6426	3.06561	14.4034	2.44478	1.99568	1331.63	143.311	65.9352	33.5867	5.00396
DO2_13_36	small grain	3.04693	0.0873806	10786.3	0.0771472	534.497	17.5902	23.6979	1.49033	0.107887	0.00715533	0.237188	7.48191	0.71102	0.132482	0.0450537	0.00441818	0.972697	1717.57	107.989	108.045	283.118	22.8658	26.3326	509.182	49.4654	52.0355	16.4836		2021-09-10 06:59:36.290	2021-09-10 06:59:36.290	25.057	1066.76	90.8937	122.987	Below LOD	1440.53	2366.56	547.469	30.7917	2.89768	56.8478	7.03056	2.014	1186.35	116.123	63.3605	39.241	6.19171
DO2_13_37	small grain	5.48254	0.058164	4187.98	0.0999727	303.095	24.1649	14.1993	0.755349	0.10127	0.00500369	0.161323	4.49504	1.03764	0.107116	0.0720041	0.00419727	0.937936	1592.45	79.017	79.0914	447.868	13.8604	25.131	703.505	39.1929	47.3144	28.1244		2021-09-10 07:00:53.230	2021-09-10 07:00:53.230	25.053	789.892	64.7781	148.88	Below LOD	791.461	2997.56	399.405	25.9584	3.65844	13.5524	1.8121	2.41078	666.443	105.741	70.7969	14.0935	1.64853
DO2_13_38	small grain	3.89371	0.0919547	9937.35	0.369482	431.025	10.6331	18.6443	0.969141	0.0941365	0.000877978	0.209145	1.90246	0.707049	0.0461272	0.0543394	0.00295166	0.966764	1507.77	16.9657	17.4317	340.992	8.02599	18.0186	541.176	12.5463	27.0977	22.6156		2021-09-10 07:02:06.267	2021-09-10 07:02:06.267	25.024	1459.41	108.504	122.595	Below LOD	1451.77	2464.82	410.2	20.7508	2.94274	5.1242	1.41061	1.88256	468.555	64.1843	62.6163	28.2346	2.20814
DO2_13_39	small grain	14.9236	0.0500285	3895.19	0.125193	103.158	99.7111	14.0784	0.701247	0.140872	0.00777141	0.261599	3.96724	1.4043	0.123509	0.0713755	0.00362413	0.794389	2170.99	89.14	89.2073	444.367	6.25415	21.7851	874.099	37.6089	49.9232	20.4684		2021-09-10 07:03:18.858	2021-09-10 07:03:18.858	25.03	1115.85	76.0757	129.527	Below LOD	866.993	2486.99	567.954	24.9204	3.05131	11.9478	1.60751	2.14527	315.467	44.9738	67.7182	17.376	1.86538
DO2_13_40	small grain	4.08577	0.0771542	6316.4	0.0952998	402.87	9.85297	15.3647	0.786067	0.103115	0.00197525	0.15375	1.57714	0.933458	0.0611157	0.0653979	0.00331687	0.863087	1671.09	33.4449	33.6561	408.312	5.66434	20.0711	666.942	14.6964	31.3748	24.4339		2021-09-10 07:04:35.901	2021-09-10 07:04:35.901	25.04	1213.87	79.6807	120.975	Below LOD	1176.41	2354.55	1498.66	82.6147	2.96947	9.79569	1.47373	1.76488	839.618	90.4286	62.3054	24.2417	3.0846
DO2_13_41	small grain	4.08723	0.104797	8608.03	0.113938	406.996	6.51043	16.264	0.851414	0.0978711	0.00103393	0.169055	1.54382	0.837434	0.0511663	0.0620043	0.0032388	0.853941	1580.34	18.7108	19.1078	387.711	7.14733	19.6529	616.785	9.07406	28.2319	24.5334		2021-09-10 07:05:48.757	2021-09-10 07:05:48.757	25.017	1083.79	89.3623	121.012	Below LOD	1390.43	2370.19	693.841	38.7719	2.81885	4.34857	1.24959	2.138	497.664	67.8412	62.8438	18.687	2.25109
DO2_13_42	small grain	11.1218	0.0917619	7853.08	0.123063	130.451	1.32896	14.0048	0.672144	0.169871	0.00173957	0.373439	0.629654	1.67608	0.0997603	0.0715519	0.00355603	0.710916	2553.39	16.5262	16.9002	445.468	4.12813	21.3646	998.595	8.85925	37.7279	17.4461		2021-09-10 07:08:24.444	2021-09-10 07:08:24.444	25.043	1246.25	69.327	127.781	2495.33	1070.34	2482.36	447.1	24.1799	3.06045	16.8906	1.8605	2.13977	1583.59	105.247	64.4562	82.0048	6.76204
DO2_13_43	small grain	7.63151	0.0958452	5439.98	0.156376	198.545	8.00794	13.7336	0.809593	0.152426	0.0141988	0.304119	7.25011	1.58263	0.206928	0.073199	0.00404576	0.902425	2278.32	163.152	163.195	455.255	11.5698	24.2953	943.783	73.9154	82.4142	19.982		2021-09-10 07:09:30.400	2021-09-10 07:09:30.400	15.204	1046.65	100.181	124.036	Below LOD	1624.9	2513.27	1411.76	108.841	2.9799	18.6069	3.60338	2.05325	833.521	139.399	61.2859	16.3373	3.10841
DO2_13_44	small grain	7.33405	0.0579181	4068.12	0.154087	213.692	3.51671	13.8744	0.684708	0.12646	0.00135645	0.233775	0.877518	1.25045	0.0736484	0.0722861	0.00361807	0.635806	2045.79	18.6536	19.0371	449.871	4.90313	21.7389	824.387	6.63558	35.5278	21.9901		2021-09-10 07:10:50.086	2021-09-10 07:10:50.086	25.008	883.348	74.611	111.813	Below LOD	1079.46	2210.59	528.954	31.482	2.64597	34.3619	3.93058	1.87982	808.941	108.897	55.4557	18.7686	1.91133
DO2_13_45	small grain	10.0311	0.186365	17331	0.215692	148.686	1.38653	17.6848	0.875546	0.151856	0.00183364	0.318381	1.30422	1.18912	0.071792	0.0565992	0.00278697	0.754787	2362.98	19.6282	19.9446	354.901	2.18575	17.0049	794.543	9.27742	32.6201	15.0192		2021-09-10 07:12:03.059	2021-09-10 07:12:03.059	25.004	2038.52	124.892	123.78	2511.8	964.099	2346.13	1830.3	72.4042	2.98947	106.269	9.99419	2.20982	1750.58	130.439	64.7509	124.767	7.01886
DO2_13_46	small grain	-32.4291	0.00511267	339.885	0.43166	-54.9135	165.657	16.2799	0.780174	0.071223	0.00220133	0.255116	1.40408	0.60323	0.0394074	0.0615067	0.00301501	0.0612902	931.612	65.9702	66.1292	384.768	2.84489	18.2962	477.736	11.6396	25.0787	41.3013		2021-09-10 07:13:16.071	2021-09-10 07:13:16.071	25.02	485.388	85.8294	92.2094	Below LOD	682.684	1873.74	282.149	12.7901	2.19765	8.16239	1.4761	1.4362	Below LOD	23.3036	45.8805	0.757886	0.301385
DO2_13_47	small grain	6.23209	0.17942	19195.1	0.0754924	259.162	1.62744	22.7301	1.12013	0.111634	0.00132649	0.198535	0.864977	0.677707	0.0414187	0.04396	0.00218952	0.896273	1821.78	21.5736	21.9329	277.316	3.03306	13.5431	524.592	8.4105	25.7082	15.2223		2021-09-10 07:14:24.593	2021-09-10 07:14:24.593	25.025	2286.55	98.0236	100.092	3512.34	1071.43	1940.1	2002.69	87.0961	2.34422	39.6756	3.06184	1.49844	2075.12	150.858	50.0058	182.427	10.8436
DO2_13_48	small grain	7.09716	0.0946215	9531.59	0.0611138	220.584	3.12639	16.9669	0.85465	0.127508	0.00256727	0.22121	1.39635	1.03994	0.065994	0.059107	0.00294695	0.624318	2053.59	34.0928	34.2875	370.164	3.95108	17.9391	721.914	12.8887	31.5261	18.0252		2021-09-10 07:15:37.333	2021-09-10 07:15:37.333	25.013	3187.26	297.484	130.37	Below LOD	1215.03	2610.54	1670.79	139.959	3.35149	10.8605	1.56455	2.29083	1232.4	111.783	64.4428	49.3367	4.09778
DO2_13_49	small grain	10.1604	0.093317	6931.24	0.196788	142.723	4.35604	14.6385	0.811897	0.175743	0.00854607	0.390401	2.75875	1.67648	0.144017	0.0686265	0.00386065	0.682753	2556.44	84.3966	84.4786	427.627	11.7435	23.3629	981.145	40.1226	54.2498	16.7274		2021-09-10 07:16:54.506	2021-09-10 07:16:54.506	25.057	1361.85	129.563	154.646	Below LOD	1076	3097.39	447.685	21.231	3.62736	10.5955	2.3078	2.38571	272.316	59.2556	77.0843	29.3198	4.58195
DO2_13_50	small grain	4.93154	0.0850012	7082.1	0.148063	333.688	5.50927	16.2801	0.84386	0.103169	0.00262499	0.205496	2.64904	0.878283	0.0581822	0.0619522	0.00327262	0.607177	1673.28	47.5425	47.7119	387.392	7.69109	19.8524	637.746	14.9072	30.6311	23.1517		2021-09-10 07:18:11.632	2021-09-10 07:18:11.632	25.014	2585.41	246.197	108.194	Below LOD	964.029	1996.04	324.653	10.379	2.61108	11.0275	1.87505	1.80363	585.836	59.1215	57.2047	35.8272	2.4673
DO2_13_51	small grain	9.96944	0.0883389	6856.46	0.0452898	149.461	2.07071	13.6152	0.65292	0.154473	0.00286272	0.291364	1.28109	1.57436	0.10013	0.0739388	0.00382771	0.723087	2387.33	31.5671	31.7802	459.733	7.78583	22.9076	957.126	16.1761	38.9528	19.2572		2021-09-10 07:19:20.197	2021-09-10 07:19:20.197	25.133	1279.96	118.616	133.948	Below LOD	1412.85	2713.43	1609.48	111.886	3.14771	26.1581	2.83736	2.093	1486.02	174.232	70.5655	37.9751	3.087
DO2_13_52	small grain	8.32573	0.0786364	7341.53	0.0620839	185.651	2.10077	15.1089	0.786583	0.13365	0.00136547	0.24089	0.736871	1.22655	0.0745469	0.0666579	0.0034432	0.847545	2143.32	17.0539	17.4416	415.9	6.97967	20.8056	811.509	10.424	34.0437	19.4045		2021-09-10 07:20:37.431	2021-09-10 07:20:37.431	25.053	1375.55	96.9736	131.632	Below LOD	1493.61	2716.83	336.404	19.9757	3.15666	3.87778	1.22914	2.07206	290.527	60.1428	68.5515	29.1373	3.56841
DO2_13_200	small grain	9.75823	0.0796373	7312.2	0.0961077	151.97	2.9869	14.2884	0.79079	0.156541	0.00393651	0.314113	1.92197	1.515	0.104009	0.0699943	0.00361249	0.882492	2417.67	45.27	45.4352	436.025	7.31928	21.7039	931.179	20.9726	38.9136	18.0349		2021-09-10 07:24:05.272	2021-09-10 07:24:05.272	25.027	1697.19	110.516	139.389	Below LOD	1500.87	2793.61	877.341	50.3888	3.38974	31.6307	3.94565	2.25273	856.738	92.2784	68.3369	28.6485	2.77641
DO2_13_201	small grain	7.96593	0.0908345	7559.7	0.948539	195.342	2.28769	16.5678	0.9963	0.130748	0.00283279	0.448535	3.77635	1.10739	0.0743747	0.0614752	0.00341097	0.761865	2096.47	36.0841	36.2618	384.408	10.0161	20.7536	753.034	18.3725	36.1164	18.336		2021-09-10 07:25:18.487	2021-09-10 07:25:18.487	25.009	2404.22	165.096	108.2	Below LOD	1151.04	2159.35	842.159	32.8004	2.58397	54.9734	13.4828	1.7865	1242.12	121.166	55.5737	32.3835	3.56703
DO2_13_202	small grain	-1.85776	0.062671	4953.97	0.0469514	-872.276	131.159	15.8446	0.79393	0.110272	0.00183485	0.166754	1.50465	0.963796	0.0602188	0.0633191	0.00316127	0.77842	1796.05	29.7369	29.9865	395.742	4.51221	19.165	683.625	11.9044	31.2463	22.034		2021-09-10 07:26:31.244	2021-09-10 07:26:31.244	25.041	1196.03	74.8604	117.164	Below LOD	1103.83	2372.82	1670.77	99.9924	2.75636	2.61915	0.937133	1.84003	603.158	95.2987	60.5604	22.6599	2.49272
DO2_13_203	small grain	124.274	0.0714272	6564.83	0.126121	13.4152	4372.26	17.0137	0.851926	0.0970231	0.000839762	0.15316	1.03362	0.792356	0.0491771	0.0591823	0.00305227	0.947606	1564.88	15.9004	16.4111	370.579	6.28212	18.5566	591.326	10.1287	27.6069	23.681		2021-09-10 07:27:44.336	2021-09-10 07:27:44.336	25.006	2092.85	110.736	117.539	Below LOD	1077.11	2368.36	563.567	23.7374	2.77595	6.23797	1.80956	1.80929	570.647	72.3481	59.2957	28.1795	2.72444
DO2_13_204	small grain	-20.8296	0.0603447	6153.64	0.112602	-85.0084	1107.73	17.2037	0.82069	0.0715022	0.0010268	0.074082	2.88991	0.576186	0.0345707	0.0582767	0.00296621	0.296989	965.067	27.1429	27.45	365.083	5.41908	18.0605	462.745	5.48308	20.6725	37.8299		2021-09-10 07:29:01.410	2021-09-10 07:29:01.410	25.192	1002.82	83.1235	149.774	5100.73	1997.69	2890.79	698.327	52.8797	3.55836	28.1525	3.52405	2.45462	643.003	89.8902	76.9226	38.0791	5.03495
DO2_13_205	small grain	4.21403	0.31544	44025.9	0.158051	397.395	3.56961	26.5086	1.69047	0.0957891	0.00233056	0.176303	2.40567	0.505425	0.035176	0.0390134	0.00277216	0.86222	1526.62	46.0109	46.1903	246.432	12.5194	17.1625	413.32	13.4659	24.1807	16.1423		2021-09-10 07:30:10.177	2021-09-10 07:30:10.177	25.134	1685.45	129.549	140.353	11500.3	2323.16	3391.27	1403.81	77.3202	3.35558	43.658	7.89467	2.23087	1107.17	137.739	74.7839	186.115	17.2643
DO2_13_206	small grain	3.04027	0.0736273	7633.32	0.239338	502.239	62.2293	15.8707	0.97847	0.139286	0.00287574	0.272629	1.86906	1.21879	0.0893247	0.0640236	0.00373593	0.942114	2214.14	35.7249	35.9187	399.763	12.509	22.5634	802.556	23.5065	38.2035	18.055		2021-09-10 07:31:27.691	2021-09-10 07:31:27.691	25.012	1492.37	97.8449	173.624	Below LOD	1488.84	3494.6	736.39	45.8725	4.06148	34.9097	3.57912	2.59551	1283.26	142.946	91.2198	43.0878	4.43197
DO2_13_207	small grain	2.31887	0.0718337	6527.89	0.337949	721.355	18.794	15.9776	1.07715	0.0962069	0.00231514	0.163558	2.39003	0.868818	0.0692561	0.0646761	0.00387807	0.92775	1536.42	42.2451	42.4135	403.654	13.8002	23.5386	627.33	25.4939	37.0165	26.2724		2021-09-10 07:32:40.441	2021-09-10 07:32:40.441	25.139	1037.03	120.597	125.88	Below LOD	1297.11	2399.66	669.604	41.9596	2.99316	12.8652	2.19967	1.97176	1152.92	147.694	66.5562	27.7892	3.04274
DO2_13_208	small grain	3.73479	0.0751554	7520.74	0.228443	456.038	17.6273	18.2883	0.972801	0.0880763	0.00135755	0.120543	1.21515	0.665366	0.0433835	0.0546929	0.00294147	0.882061	1376.61	29.6713	29.9621	343.162	7.70465	18.0425	516.131	12.4976	27.0567	24.9281		2021-09-10 07:33:53.224	2021-09-10 07:33:53.224	25.021	1366.94	111.367	122.08	Below LOD	1339.83	2443.46	1359.84	69.898	2.9065	18.4927	2.25068	2.0179	597.096	74.0077	63.2301	24.6564	3.47745
DO2_13_209	small grain	4.58282	0.0620903	5020.86	0.198163	354.219	9.25822	14.284	0.740661	0.11009	0.00290643	0.169439	2.36007	1.08122	0.0777925	0.0706176	0.00369022	0.917846	1782.31	47.6011	47.7586	439.753	8.2283	22.2093	738.466	22.3618	37.5481	24.6732		2021-09-10 07:35:06.078	2021-09-10 07:35:06.078	25.031	1230.2	95.5012	125.998	Below LOD	1258.33	2507.63	1247.03	70.5584	3.02665	32.0105	5.90401	2.1462	790.469	112.117	63.9569	16.9064	1.93447
DO2_13_210	small grain	5.40723	0.283194	20081.4	0.293272	302.919	2.44248	12.5677	0.650988	0.1056	0.0023851	0.199851	1.52606	1.17319	0.0750556	0.0812258	0.00469733	0.701625	1711.01	40.5664	40.7501	503.021	15.1285	27.8662	785.605	14.7901	34.4584	29.399		2021-09-10 07:36:10.471	2021-09-10 07:36:10.471	25.017	4366.94	182.272	141.783	Below LOD	1586.81	2734.5	1025.92	46.8891	3.37702	17.4602	3.1777	2.28484	1140.88	82.9169	70.2513	110.31	5.8103
DO2_13_211	small grain	11.6742	0.0115809	584.587	1.13133	141.195	86.4232	13.7845	0.726406	0.102839	0.00247896	0.303862	2.35291	1.03832	0.0695148	0.0729211	0.00371226	0.789801	1659.64	44.8803	45.0586	453.656	6.42172	22.3278	719.604	17.4425	34.7368	27.3347		2021-09-10 07:38:46.201	2021-09-10 07:38:46.201	25.041	471.33	52.3135	78.1042	Below LOD	716.828	1489.72	271.238	13.9709	1.85728	6.40531	1.01912	1.24685	Below LOD	17.9954	39.0762	0.994344	0.266978
DO2_13_212	small grain	12.2839	0.106625	7941.04	0.759347	114.68	3.18206	13.1973	0.803865	0.191953	0.00680786	0.424339	2.04039	2.07209	0.166609	0.0768397	0.0042694	0.941849	2727.3	63.8462	63.963	476.956	12.3888	25.6412	1121.2	41.2037	59.3217	17.4882		2021-09-10 07:40:03.289	2021-09-10 07:40:03.289	25.033	1173.53	101.784	119.25	6153.22	1663.57	2226.53	1367.12	79.094	2.80094	73.0035	9.93665	1.96295	964.175	94.1498	61.6404	59.668	5.87045
DO2_13_213	small grain	6.42771	0.0902851	9046.11	0.261234	245.704	6.51234	14.8998	0.854246	0.124216	0.00430391	0.237044	2.75224	1.17573	0.103761	0.06943	0.00437797	0.955313	1990.23	56.5936	56.7021	432.215	16.7136	26.2463	792.46	38.7214	51.2582	21.7168		2021-09-10 07:41:19.792	2021-09-10 07:41:19.792	25.013	1435.54	111.453	149.369	5572.54	2100.55	2841.27	773.744	44.3193	3.5526	15.7089	2.87677	2.24949	1314.02	185.501	76.005	51.0991	5.6831
DO2_13_214	small grain	10.5576	0.0822297	7088.34	0.437076	138.087	3.19234	15.4568	0.994332	0.170568	0.00736748	0.357419	2.70038	1.56509	0.124759	0.0662266	0.0037642	0.59777	2523.93	66.5685	66.6506	413.125	11.8215	22.8256	943.267	33.5095	48.6998	16.3683		2021-09-10 07:42:32.477	2021-09-10 07:42:32.477	25.307	2126.28	114.035	126.312	4814.71	1678.24	2222.48	1097.46	43.6803	2.70909	20.9878	2.69461	1.81883	532.289	57.9681	60.7892	43.2846	5.28598
DO2_13_215	small grain	14.156	0.106521	8140.52	0.310919	96.4841	1.62162	11.9738	0.7135	0.20831	0.00442891	0.463878	1.63076	2.41979	0.184728	0.0839973	0.00487419	0.985703	2894.06	36.4194	36.6057	519.487	15.691	28.7653	1241.88	36.0144	55.1769	17.9501		2021-09-10 07:43:49.754	2021-09-10 07:43:49.754	25.098	2002.77	149.053	140.506	Below LOD	1494.86	2804.9	525.188	23.6122	3.44798	15.0669	2.07019	2.35241	1129.74	124.277	71.7706	47.3277	4.13594
DO2_13_216	small grain	9.07359	0.0665462	4631.32	0.5598	161.69	5.57973	13.3599	0.697044	0.168272	0.00762368	0.347296	3.11694	1.75363	0.139364	0.0750207	0.00380146	0.793034	2485.01	85.8182	85.9143	466.259	6.37939	22.7709	1018.85	37.6851	54.9558	18.7628		2021-09-10 07:45:02.734	2021-09-10 07:45:02.734	25.004	1124.49	87.5425	129.519	Below LOD	1041.71	2527.58	597.557	36.1726	3.22504	21.2552	3.18484	2.3301	1268.58	211.439	69.0695	14.1034	1.87154
DO2_13_217	small grain	8.20296	0.185264	18165.8	0.262883	188.464	1.19388	20.485	1.02724	0.13355	0.00132093	0.262601	0.652714	0.90426	0.0550999	0.049035	0.0024798	0.88853	2142.07	16.9896	17.4027	308.563	4.17171	15.2335	653.004	9.30603	29.5678	14.4049		2021-09-10 07:46:15.510	2021-09-10 07:46:15.510	25.12	2173.28	102.388	130.63	20448.6	5417.69	2601.59	1893.3	85.1939	3.11942	93.558	6.31645	2.06864	2542.05	218.936	71.1259	432.774	86.4122
DO2_13_218	small grain	8.06334	0.100417	11704.8	0.191438	190.458	2.86876	19.315	0.97645	0.137711	0.00287251	0.265582	1.4208	0.988489	0.0632476	0.0519658	0.00261149	0.651392	2187.76	35.3282	35.516	326.55	4.01542	16.0015	695.852	13.4072	31.3933	14.9263		2021-09-10 07:47:24.242	2021-09-10 07:47:24.242	25.009	1358.96	132.785	147.531	3176.23	1397.75	2802.07	898.492	57.3212	3.56678	41.8685	4.23779	2.19116	1650.09	156.864	66.5322	108.516	10.6193
DO2_13_219	small grain	5.24441	0.109682	11285.3	0.901514	302.967	9.69465	16.984	1.05595	0.127216	0.00878274	0.273406	3.80166	1.06191	0.119745	0.0605939	0.00373924	0.919519	1945.81	119.249	119.306	378.881	13.9485	22.6577	731.43	53.1233	61.8821	19.4716		2021-09-10 07:48:37.188	2021-09-10 07:48:37.188	25.009	2054.01	177.395	129.694	47042.1	9398.55	2544.5	1594.6	93.475	3.18317	123.401	17.2779	2.09605	921.291	110.305	68.3107	147.278	21.3118
DO2_13_220	small grain	1.20679	0.0807249	7017.08	0.142559	1446.05	31.1185	16.1095	0.82044	0.07836	0.00151169	0.0914244	2.32013	0.674504	0.040307	0.0629468	0.00345129	0.645106	1144.43	37.0923	37.3231	393.353	9.61659	20.8727	523.013	6.12636	24.4756	34.371		2021-09-10 07:49:50.359	2021-09-10 07:49:50.359	25.006	1194.41	98.4495	119.438	Below LOD	1086.57	2382.04	386.78	18.7557	2.88924	273.012	81.5033	1.88045	501.614	89.723	61.566	15.7625	2.05603
DO2_13_221	small grain	18.2572	0.0347324	1568.61	2.42296	65.7163	5.89245	9.33923	0.769977	0.340512	0.0261938	0.865257	3.90635	6.99417	1.26201	0.127765	0.0139596	0.997109	3538.2	125.643	125.692	766.102	69.6752	77.8064	1872.08	139.688	147.468	21.6523		2021-09-10 07:53:26.346	2021-09-10 07:53:26.346	25.003	1311.51	215.17	110.503	Below LOD	1035.53	2137.76	279.37	21.1706	2.64009	112.06	32.0019	1.80899	110.046	55.4224	57.609	6.86301	1.37602
DO2_13_222	small grain	5.58264	0.0531873	4553.6	1.85993	280.493	7.99084	16.6278	0.869357	0.128038	0.00502063	0.35656	1.85977	1.04413	0.0704738	0.060501	0.00309711	0.244246	2051.89	74.2618	74.3728	378.61	5.83605	18.8338	726.201	18.864	36.5295	18.4517		2021-09-10 07:54:43.237	2021-09-10 07:54:43.237	25.005	2741.29	274.641	135.828	Below LOD	1429.92	2524.82	308.891	17.2782	3.23945	62.5189	13.6876	2.15169	587.475	76.6602	68.1029	30.5354	2.68729
DO2_13_224	small grain	15.6658	0.10874	10102.6	0.609591	84.7939	0.704858	13.6107	0.694787	0.229641	0.00150081	0.517337	0.289403	2.3399	0.141082	0.0738796	0.00377656	0.92787	3049.62	9.5634	10.1226	459.402	6.84546	22.664	1222.89	11.7615	42.3252	15.0642		2021-09-10 07:57:17.227	2021-09-10 07:57:17.227	25.003	2013.14	155.431	160.903	Below LOD	1863.68	3153.55	881.779	42.8421	3.8929	9.84	1.74611	2.61588	1824.01	183.86	83.0653	91.0577	7.32997
DO2_13_225	small grain	4.57467	0.0735241	10144.8	0.567162	355.965	5.38664	17.589	0.932459	0.1078	0.000770004	0.199178	0.859022	0.852291	0.0529563	0.0573474	0.0030019	0.944452	1762.8	11.7336	12.2999	359.393	6.70227	18.3006	624.628	10.5847	29.1768	20.3876		2021-09-10 07:58:34.523	2021-09-10 07:58:34.523	25.005	1548.32	164.185	163.714	15538.9	3261.15	3191.65	584.658	34.6778	3.89609	19.5688	2.37637	2.64481	900.745	118.65	84.0338	71.6364	10.7752
DO2_13_226	small grain	1.86872	0.162899	13362.5	0.345206	919.395	12.1641	13.695	0.985927	0.087421	0.00453551	0.12988	4.93634	0.883702	0.0678322	0.0776604	0.00542218	0.409111	1295.88	96.2796	96.3618	481.156	23.2622	32.4129	641.062	23.6398	35.983	37.1297		2021-09-10 07:59:51.543	2021-09-10 07:59:51.543	25.014	1723.7	119.181	145.737	Below LOD	1224.1	2896.43	615.349	27.3882	3.53215	19.5316	3.10437	2.39891	1662.35	259.331	76.8843	50.5449	6.38173
DO2_13_227	small grain	11.2183	0.0606157	6186.9	0.352933	129.005	3.03693	13.7079	0.677497	0.173388	0.00576118	0.347071	2.19636	1.75647	0.123119	0.073265	0.00370698	0.536496	2568.55	49.3454	49.4483	455.73	6.05505	22.2394	1022.71	23.8662	42.193	17.7427		2021-09-10 08:01:04.237	2021-09-10 08:01:04.237	25.027	5913.79	483.322	186.711	Below LOD	1825.53	3531.95	1298.69	54.0361	4.5331	12.7664	2.77329	2.84714	1358.47	241.326	91.8812	30.13	4.12583
DO2_13_228	small grain	4.65557	0.0607956	7503.77	0.246527	341.746	13.3479	17.6241	0.990759	0.120571	0.00403882	0.209783	2.40741	0.981162	0.0815124	0.0580314	0.00337034	0.914427	1935.82	59.8391	59.9619	363.417	11.1715	20.4937	684.128	29.5174	41.1455	18.7732		2021-09-10 08:02:21.094	2021-09-10 08:02:21.094	25.042	1209.03	97.3105	152.47	Below LOD	1539.55	2980.97	421.132	30.1988	3.69801	7.26916	1.65686	2.51379	870.558	93.8425	82.5937	39.9408	4.20309
DO2_13_229	small grain	10.5348	0.050713	4487.58	1.31091	149.705	63.1657	14.2796	0.722791	0.124289	0.00340905	0.290547	2.14088	1.20554	0.0793209	0.070194	0.00348921	0.575478	2000.42	46.3096	46.4515	437.293	4.20542	21.0277	799.683	17.3537	36.328	21.86		2021-09-10 08:03:37.867	2021-09-10 08:03:37.867	25.006	829.822	95.4658	133.419	6905.28	1729.73	2648.96	502.299	33.5929	3.24234	25.1786	2.8922	2.19862	149.457	41.1502	73.0107	38.4011	5.66607
DO2_13_230	small grain	9.17538	0.0636827	6695.35	0.318193	173.68	36.1133	15.7183	0.772136	0.117973	0.00082528	0.21001	0.474266	1.03875	0.0621186	0.0638373	0.00321031	0.897818	1923.84	11.793	12.3882	398.879	4.73473	19.4365	722.633	7.60069	30.7426	20.7335		2021-09-10 08:04:54.701	2021-09-10 08:04:54.701	25.034	1231.35	99.5478	148.373	Below LOD	1564.29	2858.4	508.072	34.6108	3.61468	7.69816	1.79859	2.48982	460.225	67.7809	78.0725	29.2969	2.61122
DO2_13_231	small grain	3.5522	0.0529492	3469.11	1.07068	475.126	96.1692	14.5458	0.729648	0.0926971	0.0028035	0.19309	1.56566	0.877961	0.0568971	0.0688049	0.00337292	0.0470024	1458.55	52.1555	52.2868	428.941	2.4391	20.3576	637.764	13.4935	30.04	29.4087		2021-09-10 08:07:26.043	2021-09-10 08:07:26.043	25.041	635.428	60.1506	104.752	Below LOD	1067.94	2081.1	288.198	11.6339	2.5298	10.3774	1.63681	1.7808	Below LOD	35.0618	54.3727	6.00492	0.966578
DO2_13_232	small grain	2.68088	0.0596045	5030.26	0.353352	628.937	39.0679	15.0079	0.755501	0.0907999	0.00300218	0.168699	5.15921	0.851259	0.0654312	0.0671693	0.00350789	0.734011	1429.33	57.1064	57.2267	418.972	7.6759	21.1557	623.926	23.268	35.3349	29.3125		2021-09-10 08:08:42.997	2021-09-10 08:08:42.997	25.006	948.666	80.717	121.605	Below LOD	1000.85	2238.82	500.257	25.5563	2.88519	4.07219	1.24622	1.96102	250.41	61.7775	64.4649	13.1801	2.12485
DO2_13_234	small grain	6.73539	0.0558399	6023.61	0.483022	233.975	4.00819	15.2659	0.868042	0.123632	0.00127846	0.22764	0.802594	1.1332	0.0720079	0.0665195	0.00364969	0.921299	2005.94	18.0185	18.4181	414.966	10.1674	22.0659	766.964	14.2687	34.6081	20.6869		2021-09-10 08:11:08.856	2021-09-10 08:11:08.856	25.033	1231.4	131.231	147.004	Below LOD	1304.6	2905.43	511.39	31.2779	3.49651	18.0759	2.35695	2.44029	969.954	104.883	76.1579	26.6004	2.90592
DO2_13_235	small grain	10.4602	0.0609361	4584.12	0.182025	147.964	40.0435	12.9759	0.722756	0.137519	0.00734575	0.2682	4.27536	1.61903	0.198376	0.080657	0.0055509	0.992483	2134.07	84.3954	84.4634	499.056	23.1979	32.7737	932.654	59.6849	67.6981	23.3852		2021-09-10 08:12:26.563	2021-09-10 08:12:26.563	25.004	909.787	86.7077	131.652	Below LOD	1047.47	2520.64	508.043	34.4614	3.24403	8.19652	1.42751	2.24472	586.281	75.6133	67.5994	23.5309	4.20009
DO2_13_236	small grain	5.36523	0.0717331	6075.93	0.457497	301.365	4.70594	15.6958	0.834814	0.112143	0.00319119	0.202973	1.94598	1.00032	0.0718306	0.0641787	0.00331447	0.865066	1813.3	50.3591	50.5024	400.905	6.76651	20.0851	698.674	21.3084	35.944	22.1091		2021-09-10 08:13:44.191	2021-09-10 08:13:44.191	25.054	1544.46	118.414	120.625	Below LOD	1568.99	2307.38	526.622	19.3306	2.97248	10.0381	1.89967	2.05564	413.302	46.801	61.9398	17.5593	1.61939
DO2_13_237	small grain	9.47789	0.0692017	6177.01	0.821225	155.244	5.03202	16.2331	0.960932	0.166949	0.00861589	0.370234	2.91479	1.5159	0.167536	0.0635749	0.00407709	0.96268	2466.93	86.1648	86.2392	399.478	16.7499	25.6981	911.006	53.789	63.1234	16.1933		2021-09-10 08:15:01.164	2021-09-10 08:15:01.164	25.009	3495.01	211.218	120.571	Below LOD	1014.15	2336.97	509.851	16.4573	2.95421	26.1989	2.83971	1.94336	1730.23	330.797	61.6362	28.5142	2.45865
DO2_13_238	small grain	-0.543177	0.0685086	6330.47	0.521386	-3230.5	120.16	12.4609	0.752585	0.0759383	0.00108064	0.259544	2.74993	0.844207	0.0621319	0.0805395	0.00471781	0.992271	1088.37	27.4836	27.8004	499.026	15.5676	27.9676	618.023	20.1002	32.524	45.8508		2021-09-10 08:16:25.278	2021-09-10 08:16:25.278	17.881	1210.51	100.908	187.797	Below LOD	1998.81	3492.03	622.604	32.6304	4.63438	7.5971	2.70217	3.22482	Below LOD	62.5803	100.826	11.6438	1.79258
DO2_13_239	small grain	5.08318	0.0425416	5159.29	0.275588	340.312	349.95	17.9038	0.876034	0.0805627	0.00217085	0.105892	4.83655	0.62741	0.0442974	0.0560668	0.00282384	0.903562	1192.02	46.5066	46.6543	351.626	4.44125	17.218	487.86	12.301	21.4515	29.4984		2021-09-10 08:17:31.243	2021-09-10 08:17:31.243	25.04	1157.63	98.4191	174.105	Below LOD	1665.84	3250.78	579.829	27.9606	4.2269	33.2359	4.46373	2.76705	1400.03	162.803	90.8245	22.4245	2.04238
DO2_13_240	small grain	-1.08065	0.0605939	5059.26	0.12862	-1689.16	130.919	15.2612	0.798742	0.0610767	0.000366061	0.0435747	0.927675	0.55406	0.0331407	0.0657685	0.00330254	0.939757	639.911	12.0101	12.8594	410.568	4.92156	19.9981	447.304	5.53013	21.8467	64.1601		2021-09-10 08:18:44.338	2021-09-10 08:18:44.338	25.01	924.806	77.4872	116.774	6278.34	2271.88	2261.61	443.301	24.8056	2.81528		1.12378	1.8549	248.457	52.0189	62.5305	17.4427	2.83535
DO2_13_241	small grain	5.53892	0.0940541	7991.47	0.226715	291.555	4.35348	13.942	0.81171	0.111855	0.00170941	0.194373	1.45418	1.10515	0.0794965	0.0716987	0.00440611	0.955945	1822.86	27.9833	28.2624	445.906	16.1448	26.4197	750.017	22.3322	37.5691	24.4618		2021-09-10 08:22:20.872	2021-09-10 08:22:20.872	25.005	1552.61	118.735	147.866	Below LOD	1158.28	2922.69	934.851	47.9111	3.54074	3.12785	1.38255	2.38127	360.783	60.2852	80.8172	33.8496	3.31401
DO2_13_242	small grain	5.85454	0.0628479	4549.25	0.956046	271.077	9.11828	14.3019	0.696056	0.119122	0.00282055	0.238364	2.37286	1.15826	0.0801642	0.0702224	0.00364289	0.799991	1928.07	42.9853	43.1624	437.39	7.62501	21.9239	786.853	23.5353	42.8583	22.6854		2021-09-10 08:23:29.566	2021-09-10 08:23:29.566	25.097	1614.7	232.889	110.074	9425.18	2781.5	2097.57	1198.42	55.5059	2.65741	39.959	10.602	1.85239	769.476	102.011	56.7348	32.4216	6.39102
DO2_13_243	small grain	1.04778	0.173747	20000.8	0.939716	1670.52	48.4617	24.0737	1.50423	0.0758737	0.00377283	0.265138	3.769	0.496926	0.0818679	0.0435237	0.0034552	0.933813	1034.73	81.1337	81.2091	274.135	16.6239	21.0357	379.487	32.2478	34.4406	26.4934		2021-09-10 08:24:46.632	2021-09-10 08:24:46.632	25.045	1196.6	106.418	122.385	3609.36	1343.63	2396.68	496.342	28.0303	2.97243	12.4437	1.64642	2.07709	228.272	45.9264	65.2783	42.6464	4.68586
DO2_13_244	small grain	20.4271	0.0825227	5729.48	0.120302	78.5561	331.828	14.7649	0.780075	0.121572	0.00790685	0.211032	5.35361	1.15109	0.111452	0.0678897	0.0034437	0.822744	1871.56	116.827	116.89	423.367	5.84993	20.7703	764.217	41.462	51.7067	22.621		2021-09-10 08:25:59.487	2021-09-10 08:25:59.487	25.287	1366.99	112.412	111.263	Below LOD	765.062	2124.94	421.584	37.2888	2.6893	2.98418	0.976695	1.75538	347.664	68.7922	56.7128	20.9156	4.81974
DO2_13_245	small grain	3.17154	0.058898	4322.5	0.380942	533.108	14.226	17.23	0.857561	0.0913808	0.00487748	0.137492	1.35363	0.729709	0.0542422	0.058069	0.00293718	-0.697992	1442.64	115.711	115.805	363.866	4.93313	17.8867	555.815	20.7014	32.9626	25.2222		2021-09-10 08:27:16.487	2021-09-10 08:27:16.487	25.147	1345.47	86.6546	127.302	4317.27	1274.99	2432.04	1311.77	57.9288	2.98799	16.0657	3.36109	1.89809	672.056	94.5196	66.3092	33.7729	3.60862
DO2_13_246	small grain	6.05	0.0686338	5483.67	0.181926	267.085	15.7041	15.3357	0.788797	0.111466	0.00149609	0.17675	1.15467	1.00848	0.062925	0.0654832	0.00329827	0.868781	1818.24	23.3452	23.6484	408.835	5.25566	19.9648	706.483	11.7799	31.3376	22.4852		2021-09-10 08:28:33.721	2021-09-10 08:28:33.721	25.221	1681.41	144.153	112.054	Below LOD	1563.37	2213.58	1514.3	88.2296	2.74975	16.9476	2.47974	1.80718	648.958	100.404	60.529	26.829	2.95004
DO2_13_248	small grain	2.6556	0.0766956	5610.24	0.0492377	663.645	32.4882	16.0017	0.779049	0.0740487	0.00081815	0.0714283	1.89788	0.638881	0.0378344	0.0626093	0.00309087	0.518037	1038.41	21.1518	21.5609	391.453	3.39441	18.742	501.308	5.11743	23.191	37.6974		2021-09-10 08:30:59.641	2021-09-10 08:30:59.641	25.254	938.601	70.3589	137.587	Below LOD	960.461	2731.78	1301.57	54.1285	3.35819		0.894753	2.26355	146.169	48.4272	76.4074	8.49222	1.43549
DO2_13_249	small grain	4.91405	0.293982	36193.8	0.343976	336.63	3.15657	23.8044	1.34008	0.101268	0.00238198	0.24791	1.74004	0.598965	0.0415575	0.0430279	0.00251759	0.755908	1630.27	47.0864	47.283	271.438	8.64778	15.5357	474.199	14.2143	25.7107	16.6499		2021-09-10 08:32:12.586	2021-09-10 08:32:12.586	25.01	1693.92	140.092	138.3	7773.41	2189.57	2607.22	1091.61	65.8189	3.2907	24.9959	4.15237	2.19917	905.458	77.4128	73.0438	164.259	22.7454
DO2_13_250	small grain	4.40534	0.0846271	5806.14	0.0521511	376.43	4.75024	14.8535	0.750323	0.0995883	0.00212029	0.142961	2.22859	0.930408	0.0588937	0.0674671	0.00334497	0.508547	1609.76	39.2998	39.5003	420.851	3.85761	20.2107	666.097	12.3112	30.5059	26.1437		2021-09-10 08:33:29.582	2021-09-10 08:33:29.582	25.009	1239.91	91.9086	103.426	Below LOD	1265.43	2048.24	1617.14	82.5819	2.54332	5.76824	1.14578	1.65012	497.49	101.935	53.8845	15.8821	1.67502
DO2_13_251	small grain	4.75215	0.249807	33851.6	0.0741857	350.988	2.31737	24.1614	1.38734	0.0969505	0.00127747	0.147203	0.768191	0.557957	0.0359914	0.0419142	0.00241216	0.911534	1560.85	24.2594	24.5866	264.573	7.98058	14.934	448.958	10.4079	23.5047	16.9505		2021-09-10 08:40:11.914	2021-09-10 08:40:11.914	25.003	4143.83	214.627	118.762	3861.65	1758.85	2293.87	1438.06	49.3508	2.81931	12.1151	2.29626	1.81432	256.317	51.6844	62.1022	340.127	45.3046
DO2_13_253	small grain	2.89	0.112579	11781.3	0.188334	606.558	33.4172	19.4015	0.985093	0.076138	0.000465179	0.132772	0.521416	0.539686	0.0318027	0.0512964	0.00256401	0.903451	1096.82	11.4018	12.175	322.451	3.73298	15.731	438.025	4.11632	21.0964	29.3987		2021-09-10 08:42:47.079	2021-09-10 08:42:47.079	25.013	1447	122.804	118.5	3943.91	1936.02	2296.69	767.94	39.8879	2.88264	10.4772	2.30987	1.93872	1409.13	130.943	63.7595	78.9187	6.37646
DO2_13_254	small grain	8.20569	0.0724084	7028.42	0.389499	187.061	2.67966	15.7171	0.820363	0.136077	0.00207965	0.274719	1.65488	1.225	0.0829535	0.0641519	0.00334453	0.894559	2186.32	29.6423	29.9379	400.729	7.27525	20.2528	807.787	18.9964	36.539	18.329		2021-09-10 11:21:56.652	2021-09-10 11:21:56.652	25.01	2139.68	123.416	135.418	5394.03	1876.37	2668.88	1679.77	73.2487	3.27119	15.8362	2.39646	2.14193	1757.57	171.762	71.5897	59.762	6.97427
DO2_13_255	small grain	6.03783	0.0916815	12169.9	0.457775	267.63	3.8058	21.0155	1.16781	0.109537	0.00208934	0.267708	1.80658	0.720949	0.0483256	0.0479356	0.00272217	0.585317	1782.76	31.2095	31.4083	303.157	8.21253	15.9055	548.821	14.5517	28.7844	17.0049		2021-09-10 11:23:05.924	2021-09-10 11:23:05.924	25.002	1932.89	143.819	130.059	3106.28	1259.63	2461.49	1546.56	78.4966	3.27024	23.4515	5.3477	2.08972	1048.83	132.903	68.7941	67.0828	6.76968
DO2_13_256	small grain	26.1457	0.0859332	6122.72	0.0487277	63.5807	352.894	14.8511	0.751382	0.105186	0.00757858	0.151397	6.62917	0.996057	0.101279	0.0675658	0.00338129	0.883235	1589.25	125.306	125.361	421.43	4.89924	20.4201	682.646	39.9236	48.5375	26.5175		2021-09-10 11:24:19.718	2021-09-10 11:24:19.718	25.013	1398.83	102.207	122.974	Below LOD	1091.92	2521.9	1638.08	66.6298	3.10589	2.69684	0.976354	1.84074	432.065	49.4061	65.6664	12.7346	1.32097
DO2_13_257	small grain	2.79841	0.0640047	7459.91	0.46454	595.729	38.364	18.5755	1.04089	0.0963895	0.00215765	0.19318	2.29827	0.718037	0.0445034	0.0541238	0.0028354	0.361679	1548.8	42.7637	42.9609	339.714	6.48508	17.3912	548.502	9.36384	26.2146	21.934		2021-09-10 11:25:38.175	2021-09-10 11:25:38.175	25.047	1096.82	102.681	119.944	Below LOD	1102.31	2416.58	536.089	31.1315	2.99958	10.3697	2.33623	2.20725	424.98	67.1362	66.4975	33.1929	3.95134
DO2_13_258	small grain	1.2782	0.0892541	7798.87	0.115132	1365.71	35.5293	17.3978	0.979703	0.0781923	0.00142559	0.0932154	1.99979	0.621464	0.0377863	0.0578965	0.00298523	0.471485	1141.09	35.9752	36.2262	362.756	5.96925	18.2288	490.151	7.31456	23.5849	31.7902		2021-09-10 11:26:56.905	2021-09-10 11:26:56.905	25.013	1258.35	176.091	97.3212	Below LOD	1034.81	2006.76	1192.08	87.846	2.40773	4.01114	1.47158	1.66839	572.881	106.288	54.4372	29.1011	5.72569
DO2_13_259	small grain	26.3862	0.115562	5158.93	3.53309	40.6651	2.65383	7.815	0.581971	0.434068	0.0175185	1.30386	1.99153	8.38536	0.873649	0.135001	0.00947156	0.994316	4002.17	64.1401	64.2306	814.007	38.6792	53.6394	2209.08	82.8955	99.648	20.3391		2021-09-10 11:28:07.317	2021-09-10 11:28:07.317	21.602	1292.02	102.479	124.307	7048.18	1853.12	2409.01	409.158	21.992	3.10413	27.6133	3.56187	1.95089	1853.67	210.817	71.2251	2017.65	442.725
DO2_13_261	small grain	7.36714	0.0575946	5478.34	0.37015	207.3	6.94567	14.3427	0.691324	0.140009	0.00214447	0.271777	1.13768	1.36091	0.088858	0.070091	0.00358484	0.932377	2221.25	25.4901	25.7432	436.627	6.54296	21.5462	868.846	17.0821	36.9048	19.6568		2021-09-10 11:30:34.464	2021-09-10 11:30:34.464	25.138	1513.19	118.549	144.957	Below LOD	1261.7	2715.85	542.437	33.5379	3.59529	39.1114	4.57267	2.22173	845.638	105.17	81.6968	26.0393	2.61817
DO2_13_262	small grain	-1.70255	0.0699911	5093.99	0.0754579	-1020.38	103.015	15.299	0.767415	0.0798606	0.000890047	0.0855859	1.26605	0.721581	0.0439767	0.0654875	0.00323574	0.964731	1189.09	21.7812	22.1952	408.889	3.54907	19.5842	550.83	8.20953	26.0138	34.3867		2021-09-10 11:31:48.614	2021-09-10 11:31:48.614	25.024	1418.47	97.6855	111.679	Below LOD	1232.47	2076.18	1888.55	107.781	2.76884	7.20549	1.24156	1.85974	322.66	46.843	62.8963	7.53327	0.946031
DO2_13_263	small grain	17.4351	0.0093051	402.057	0.814737	74.7847	34.5496	11.1312	0.573119	0.25226	0.0132606	0.641852	2.58819	3.31177	0.348928	0.0917913	0.00535722	0.996368	3143.33	81.0276	81.095	565.573	17.4177	31.4224	1435.91	62.9526	75.3017	17.9928		2021-09-10 11:33:03.017	2021-09-10 11:33:03.017	25.003	293.217	50.3191	121.852	Below LOD	757.681	2277.89	257.367	12.3319	2.93856	7.06769	1.01372	1.86306	Below LOD	25.2491	69.5298	0.590921	0.193627
DO2_13_264	small grain	6.28647	0.0581142	4962.15	0.2298	268.157	44.174	14.5065	0.700206	0.0916913	0.00163859	0.133317	2.02308	0.866137	0.0530998	0.0689766	0.00343593	0.474102	1468.92	38.1518	38.429	429.951	4.42906	20.739	634.195	10.1224	30.4643	29.27		2021-09-10 11:35:26.402	2021-09-10 11:35:26.402	25.047	1065.63	87.5399	130.293	Below LOD	1016.44	2564.91	509.349	32.9092	3.32046	10.4816	1.56591	2.10027	358.188	73.0939	70.9968	14.3205	1.94541
DO2_13_265	small grain	23.6904	0.00931128	495.177	0.625546	74.5451	92.3891	15.945	0.7637	0.080356	0.00700072	0.222928	4.32067	0.708807	0.0852244	0.0631209	0.00326272	0.95562	1021.64	147.962	148.007	394.499	6.60046	19.7331	530.529	41.4277	47.258	38.6141		2021-09-10 11:36:44.935	2021-09-10 11:36:44.935	25.005	328.506	48.8952	78.0083	Below LOD	644.813	1517.29	253.228	11.7241	1.91395	4.71746	0.778275	1.33476	Below LOD	18.2854	42.8533	0.727627	0.23619
DO2_13_267	small grain	11.6035	0.0668136	5225.87	0.383194	122.813	3.16736	13.5298	0.69437	0.1832	0.00539041	0.383792	1.8814	1.87238	0.12293	0.0742672	0.00376644	0.312407	2660.35	51.7618	51.8996	461.74	6.34035	22.6031	1066.39	20.8662	44.1071	17.3563		2021-09-10 11:39:12.576	2021-09-10 11:39:12.576	25.119	1211.96	103.055	120.252	10651.3	1889.67	2355.89	871.856	51.0487	3.00295	36.1504	3.75618	1.97121	1365.01	150.739	67.7069	53.0849	5.8512
DO2_13_268	small grain	4.36369	0.103244	8780.47	0.103264	387.794	51.7299	17.4708	0.930845	0.0908216	0.00146244	0.120261	1.60439	0.717494	0.0425423	0.0574785	0.00289298	0.337346	1435.04	29.7255	29.9921	360.235	4.55293	17.6581	548.832	5.5545	25.384	25.1028		2021-09-10 11:40:31.882	2021-09-10 11:40:31.882	25.182	1266.32	103.408	118.649	Below LOD	1241.58	2416.94	967.769	47.1825	2.94107	14.8982	1.80695	2.04607	1468.51	104.004	65.9695	48.7487	5.02059
DO2_13_269	small grain	7.70751	0.0713694	5063.48	0.0919913	199.109	4.86594	14.4157	0.726949	0.138071	0.00377967	0.257386	2.207	1.33538	0.0901757	0.0695829	0.00347641	0.675443	2192.62	47.5303	47.6765	433.601	4.81001	20.9551	856.666	19.8233	38.4119	19.7755		2021-09-10 11:41:50.331	2021-09-10 11:41:50.331	25.004	1006.54	86.835	104.708	Below LOD	1184.95	2081.49	471.75	23.7853	2.57673	244.369	125.392	1.77606	288.999	56.3374	56.6116	16.4251	1.7336
DO2_13_270	small grain	4.79806	0.063117	5284.83	0.275751	332.717	9.31989	16.0274	0.807818	0.118339	0.00523126	0.205047	4.00671	1.02422	0.0781816	0.0627129	0.00319036	0.473012	1910.63	77.0012	77.0918	392.045	5.66263	19.3442	709.171	23.9843	36.7561	20.5191		2021-09-10 11:43:08.536	2021-09-10 11:43:08.536	25.034	1927.03	117.334	115.414	8107.93	3151.28	2348.79	1211.72	63.2905	2.88691	45.5858	7.48915	1.90547	3099.96	501.401	61.5262	45.8251	8.85741
DO2_13_271	small grain	6.40348	0.10096	8079.86	0.107502	246.909	5.55	15.6017	0.729987	0.1204	0.00457418	0.242819	4.78293	1.09637	0.0975021	0.0647557	0.00347236	0.976986	1943.4	63.4517	63.5528	404.341	8.78665	20.8801	739.792	30.339	39.9422	20.8059		2021-09-10 11:44:17.971	2021-09-10 11:44:17.971	25.012	1823.29	123.28	115.433	4695.64	1193.98	2348.27	722.441	32.6767	2.92684	8.95351	1.9354	1.94658	834.442	96.2754	65.4842	70.8628	5.88069
DO2_13_272	small grain	9.53869	0.108507	10080	0.168032	156.407	2.2225	16.6992	0.906477	0.153952	0.00333512	0.309667	1.40615	1.28871	0.0869462	0.0604082	0.0031526	0.837021	2379.29	34.9032	35.0751	378.019	6.94605	19.1795	836.185	19.7924	38.4444	15.8879		2021-09-10 11:45:27.665	2021-09-10 11:45:27.665	25.01	1762.73	114.533	155.495	22806	3202.29	3043.45	1019.42	74.5168	3.69844	24.2924	3.97511	2.45952	1841.05	252.019	82.4251	360.054	27.618
DO2_13_273	small grain	9.24794	0.0762329	5136.27	0.0614862	154.806	8.33561	12.2303	0.896222	0.188742	0.0134819	0.391596	4.75989	2.54632	0.393948	0.0895361	0.00787288	0.977233	2633.24	117.28	117.333	550.47	38.2796	45.9511	1190.56	94.4965	101.885	20.9047		2021-09-10 11:46:49.370	2021-09-10 11:46:49.370	21.797	1082.67	103.513	135.602	Below LOD	1666.04	2715.25	1190.59	59.5829	3.41142	327.06	91.5646	2.29652	719.087	130.07	76.9781	28.5877	2.65867
DO2_13_274	small grain	-4.51682	0.126474	12654.9	0.107251	-408.884	425.12	17.22	0.88915	0.0568976	0.000325682	0.0509461	0.901863	0.455733	0.0269016	0.0582333	0.0029011	0.896548	485.573	11.7456	12.6663	364.846	3.81273	17.686	381.125	3.75602	18.8236	75.1373		2021-09-10 11:50:14.256	2021-09-10 11:50:14.256	25.019	1186.96	93.8906	126.961	3772.84	1684.15	2505.73	998.186	48.0021	3.15355	20.2005	3.56768	2.13526	1176.73	102.433	71.4698	50.801	5.74867
DO2_13_53	small grain	13.7136	0.104486	7331.68	0.150111	99.5334	2.22157	13.7542	0.779853	0.210907	0.00398734	0.47254	1.26606	2.13945	0.14864	0.0733187	0.00407424	0.904896	2903.55	32.5321	32.743	455.866	11.8603	24.5337	1153.24	27.3539	49.3773	15.7003		2021-09-10 11:53:47.167	2021-09-10 11:53:47.167	25.008	1206.69	110.244	109.444	3511.18	1505.55	2195.33	550.417	26.4054	2.73058	570.972	331.527	1.82392	436.407	68.3945	58.1133	35.715	6.43847
DO2_13_55	small grain	14.8297	0.021203	900.502	0.766533	86.904	11.0398	10.6551	0.625957	0.260141	0.0116524	0.667896	2.44141	3.52144	0.316062	0.0956772	0.00536435	0.982059	3201.64	75.2013	75.2875	588.575	15.73	31.6069	1495.3	57.4431	75.1168	18.3836		2021-09-10 11:56:06.638	2021-09-10 11:56:06.638	25.06	605.556	66.5513	98.1194	Below LOD	677.201	1931.83	331.679	24.5129	2.55501	17.2177	2.21032	1.97851	79.2	64.7334	53.6854	1.09945	0.261457
DO2_13_56	small grain	6.12306	0.0715776	5426.81	0.107501	257.339	5.41734	15.8628	0.812482	0.125249	0.00391713	0.213933	2.47795	1.08435	0.0683013	0.0633245	0.00320531	-0.222088	2006.89	56.3157	56.4483	395.761	5.30619	19.4358	743.753	13.2364	33.3474	19.7201		2021-09-10 11:57:20.701	2021-09-10 11:57:20.701	25.027	2748.03	317.332	114.955	Below LOD	1079.54	2327.55	1526.09	67.1944	2.87791	10.6785	1.82244	1.99982	580.585	71.175	57.9384	21.3174	1.44748
DO2_13_57	small grain	4.84644	0.271242	24653.7	0.178581	336.613	5.91939	17.9478	1.37172	0.110053	0.00494972	0.209711	3.81655	0.839926	0.0635235	0.0575625	0.00424249	0.623379	1743.2	86.8758	86.9745	360.101	19.4892	25.9395	612.99	23.3983	36.327	20.6575		2021-09-10 11:58:34.484	2021-09-10 11:58:34.484	25.014	1451.25	104.235	144.927	3284.71	1135.63	2819.84	1583.87	75.1343	3.52662	21.3418	1.99279	2.15803	482.132	73.6731	79.0645	73.2141	5.96281
DO2_13_58	small grain	5.53662	0.0687266	6559.81	0.231669	286.227	6.7599	17.0671	0.874092	0.124738	0.00659212	0.227472	4.47284	1.00695	0.0921858	0.0589058	0.00310296	0.942263	1965.14	82.6165	82.6845	368.873	7.18269	18.8237	700.502	34.2172	44.1554	18.7708		2021-09-10 11:59:48.346	2021-09-10 11:59:48.346	25.044	2443.98	133.375	130.285	12748.8	4685.03	2556.06	1473.62	62.7203	3.28187	9.49336	2.59947	2.13768	541.837	69.5855	72.285	68.8048	18.8217
DO2_13_59	small grain	6.8884	0.0613101	4794.19	0.454583	227.065	4.95748	15.1245	0.751859	0.128346	0.00323953	0.239126	2.45683	1.17664	0.0790297	0.0663389	0.00332482	0.77166	2059.99	42.3744	42.5278	414.019	4.82466	20.0893	785.928	18.0273	35.421	20.0981		2021-09-10 12:01:07.119	2021-09-10 12:01:07.119	25.028	1487.1	94.165	111.955	Below LOD	1406.53	2192.98	1320.48	68.3183	2.74449	17.4571	2.31394	1.95165	1526.67	159.427	60.9792	28.2935	3.40162
DO2_13_60	small grain	-73.6509	0.0723724	5302.35	0.124319	-22.3529	1486.67	16.1105	0.817178	0.103466	0.0026635	0.16766	3.09845	0.888083	0.0591221	0.0625682	0.00326575	0.714911	1669.73	45.7212	45.8804	391.133	7.12572	19.7869	647.753	16.7148	33.8929	23.425		2021-09-10 12:07:46.430	2021-09-10 12:07:46.430	25.02	1160.83	88.1779	137.322	Below LOD	1504.15	2741.59	876.072	43.2564	3.35973	9.24573	1.52174	2.26658	1707.06	160.72	77.695	12.9605	1.86908
DO2_13_61	small grain	11.422	0.0645147	5027.08	0.0835692	125.573	2.58828	14.4293	0.702782	0.176222	0.00366906	0.364224	1.42638	1.70572	0.113345	0.0695411	0.00352895	0.932477	2622.25	37.9922	38.195	433.342	5.81848	21.2329	1006.89	20.1774	41.0563	16.5256		2021-09-10 12:09:05.690	2021-09-10 12:09:05.690	19.856	1747.32	127.251	135.535	Below LOD	1335.31	2618.7	336.989	16.5948	3.39278	5.84715	1.61394	2.16387	546.465	99.7912	73.5306	15.415	1.53805
DO2_13_62	small grain	3.69634	0.071746	4766.99	0.410958	444.391	11.0056	15.6739	0.763914	0.106058	0.00433038	0.22465	3.1742	0.945214	0.0688007	0.0640837	0.00325258	0.402656	1688.01	75.5998	75.7041	400.359	5.46499	19.6729	670.206	21.671	35.6513	23.7178		2021-09-10 12:10:14.155	2021-09-10 12:10:14.155	25.007	1608.54	223.26	93.2959	Below LOD	1017.53	1846.64	541.766	26.6916	2.29007	48.3821	14.447	1.6517	527.459	122.568	50.3121	16.1062	2.31098
DO2_13_63	small grain	6.14637	0.0721344	5896.99	0.20029	260.164	5.76227	16.6512	0.896991	0.117026	0.00261791	0.212308	1.25313	0.986997	0.0651463	0.0603639	0.0030466	0.820883	1898.06	39.435	39.6171	377.788	5.25031	18.552	694.149	16.2686	33.6561	19.9038		2021-09-10 12:11:28.210	2021-09-10 12:11:28.210	25.005	1280.27	101.822	147.939	18413.6	4459.78	3136.89	1434.49	58.5032	3.78938	23.1261	3.03005	2.35826	1281.4	133.195	89.7475	254.147	51.9405
DO2_13_64	small grain	3.22741	0.0931571	7700.6	0.0626888	526.211	7.15711	16.3553	1.03297	0.0891317	0.00100953	0.150054	1.1002	0.774248	0.0508042	0.0622123	0.00342105	0.935863	1402.82	20.5109	20.8879	388.897	9.67792	20.8168	580.011	13.8765	29.4217	27.7226		2021-09-10 12:12:41.931	2021-09-10 12:12:41.931	25.01	1558.37	85.5698	119.595	9521.54	2486.27	2413.56	635.219	33.7378	2.98223	36.7805	10.8675	2.11939	567.107	68.2776	64.6925	42.1678	3.48437
DO2_13_65	small grain	12.2557	0.0915968	6258.79	0.0635033	114.114	3.6647	13.4387	0.708658	0.20077	0.01085	0.427284	3.36568	2.12761	0.183052	0.074769	0.00389202	0.585544	2768.65	87.6871	87.7561	464.699	8.29418	23.3008	1136.42	42.8838	57.8955	16.7843		2021-09-10 12:14:00.583	2021-09-10 12:14:00.583	25.038	1627.99	134.505	124.396	Below LOD	1100.42	2266.89	980.104	61.7832	3.09498	23.1362	2.73767	2.15222	1633.15	174.366	68.678	54.5263	6.70122
DO2_13_66	small grain	3.23323	0.061572	5721.57	0.0897252	520.26	43.6426	17.2431	0.866434	0.0932356	0.00111615	0.138222	1.28384	0.75586	0.0452402	0.0580585	0.00284766	0.678472	1487.9	22.5587	22.9288	363.797	2.40372	17.3599	571.089	6.76666	26.1659	24.4503		2021-09-10 12:15:14.595	2021-09-10 12:15:14.595	25.055	1104.11	84.1685	123.404	43736	10684.3	2541.68	488.345	31.5529	3.08648	12.9289	2.72982	2.10432	333.695	41.8919	67.6608	159.792	29.9882
DO2_13_67	small grain	3.44653	0.0980694	11424.1	0.0185309	489.571	13.7115	21.3727	1.06087	0.0918125	0.000786275	0.135611	0.79623	0.604031	0.0367545	0.0469489	0.00236329	0.939515	1460.76	15.6725	16.1871	295.74	3.52764	14.5457	479.212	7.0849	23.1729	20.2456		2021-09-10 12:16:28.599	2021-09-10 12:16:28.599	25.083	1373.37	101.002	159.004	3846.21	1838.83	3213.87	1055.86	54.217	4.03158	18.9171	3.16919	2.66578	2153.74	169.845	86.808	91.1469	8.58148
DO2_13_68	small grain	4.79772	0.056137	3814.95	0.0453727	348.694	28.815	16.6674	0.833724	0.0963285	0.0025657	0.199196	1.61073	0.813412	0.0541388	0.0600978	0.00296363	0.750579	1535.33	47.5471	47.7016	376.203	3.07852	18.0272	601.894	14.5507	29.4238	24.5031		2021-09-10 12:17:38.058	2021-09-10 12:17:38.058	25.004	1445.28	70.9151	95.0985	4527.48	1391.4	1800.89	496.915	31.6925	2.33903	31.9033	6.94179	1.60687	85.0301	40.4168	50.547	160.496	114.775
DO2_13_69	small grain	17.7782	0.0811221	4617.32	0.0236013	71.5203	1.43624	11.2235	0.575152	0.26524	0.00578316	0.602734	1.2416	3.35525	0.228187	0.0896747	0.00460808	0.904651	3267.83	33.6055	33.769	553.472	8.79846	27.2427	1485.09	27.6924	52.6359	16.937		2021-09-10 12:18:47.388	2021-09-10 12:18:47.388	25.118	1229.99	97.6246	169.164	6414.78	1767.96	3364.42	595.668	32.7069	4.08689	42.6901	3.49456	2.68015	483.222	66.8881	86.1335	58.8261	5.73353
DO2_13_70	small grain	6.70141	0.321451	12902.2	-0.0192613	237.702	0.830137	9.18807	0.464603	0.118132	0.000570373	0.241771	0.308079	1.8211	0.112336	0.1097	0.00571466	0.985122	1926.87	7.70929	8.60278	670.749	11.835	33.1302	1050.85	13.8381	39.9496	34.8103		2021-09-10 12:22:15.795	2021-09-10 12:22:15.795	25.012	1622.14	85.0539	119.75	Below LOD	1218.03	2367.35	724.229	30.4817	2.95915	7.07717	1.03094	1.94441	594.311	51.3973	61.7719	63.6449	3.46605
DO2_13_71	small grain	5.16932	0.0790186	5985.04	-0.00843464	315.259	5.8808	16.1836	0.811152	0.106833	0.00179474	0.169542	1.91589	0.926544	0.0554004	0.0619488	0.00307	0.222666	1743.9	30.7823	31.0358	387.438	3.91972	18.6388	665.222	7.1665	28.7885	22.2168		2021-09-10 12:23:25.049	2021-09-10 12:23:25.049	25.007	1091.63	91.7006	113.352	Below LOD	1139.79	2232.27	780.784	37.8826	2.83003	8.32232	1.54612	1.80764	1662.08	220.855	61.905	20.4818	1.72593
DO2_13_72	small grain	11.0774	0.115427	9279.95	-0.00828381	131.289	1.39988	16.6393	0.827668	0.168463	0.00197107	0.32746	0.813605	1.42608	0.0850891	0.0604306	0.00308005	0.730978	2538.76	18.8635	19.1879	378.184	5.71762	18.7076	899.002	8.90982	35.7227	14.8964		2021-09-10 12:24:38.935	2021-09-10 12:24:38.935	25.056	1766.95	105.641	120.858	Below LOD	894.998	2373.51	1893.7	96.0611	3.01999	8.60379	1.50005	2.0553	609.011	60.5797	65.3292	74.2179	5.46628
DO2_13_73	small grain	9.28976	0.0561635	5227.17	-0.0111112	159.122	4.50629	14.8241	0.721768	0.159418	0.00355224	0.306856	1.59496	1.51299	0.097393	0.0675262	0.00334228	0.818915	2437.94	35.8673	36.0343	421.221	2.70375	20.1708	932.468	16.3637	37.8516	17.2778		2021-09-10 12:25:52.719	2021-09-10 12:25:52.719	25.026	5409.68	406.661	144.815	Below LOD	1446.62	2886.29	1009.58	52.5919	3.57432	9.2758	1.32341	2.33506	328.259	62.7816	81.0923	14.6574	1.5321
DO2_13_74	small grain	5.02563	0.0696448	4917.7	-0.00502428	324.395	13.7936	15.3112	0.733851	0.108776	0.00441783	0.181149	3.86092	0.9981	0.0722328	0.065424	0.00320699	0.507931	1748.51	71.9863	72.0867	408.506	3.43904	19.3881	697.595	21.1397	35.2763	23.3631		2021-09-10 12:27:02.148	2021-09-10 12:27:02.148	25.052	998.44	75.3086	132.145	Below LOD	1079.62	2632.01	356.081	14.775	3.25126	7.40193	1.21439	2.2765	462.774	72.8974	67.2427	13.3347	1.5516
DO2_13_75	small grain	7.93217	0.076966	5547.39	0.0167804	194.734	3.2086	14.7405	0.86064	0.134055	0.00153041	0.252221	0.819484	1.27011	0.0816158	0.0683784	0.00354822	0.925908	2147.89	19.5688	19.9227	426.285	7.17675	21.4664	834.7	14.6923	34.0475	19.8466		2021-09-10 12:28:11.513	2021-09-10 12:28:11.513	25.008	1208.59	92.9962	131.024	Below LOD	1270.7	2665.24	866.289	48.7208	3.2378	21.4868	3.60923	2.06845	1154.21	151.501	72.3001	24.0421	4.41295
DO2_13_77	small grain	5.11969	0.0768938	5026.03	0.0433458	309.345	12.1997	13.4063	0.720809	0.1253	0.00674299	0.231235	4.34418	1.43465	0.176325	0.0778372	0.00528885	0.988267	1969.68	84.9713	85.0387	482.317	21.9321	31.2966	863.015	56.3926	63.8897	24.487		2021-09-10 12:30:44.282	2021-09-10 12:30:44.282	25.112	1004.1	74.5846	114.069	Below LOD	1179.66	2285.25	346.145	19.4077	2.83563	5.77509	1.09788	1.8168	689.843	74.2862	62.8158	30.2355	3.63367
DO2_13_78	small grain	-0.564753	0.0748009	8012.32	0.0761792	-2886.71	110.017	17.1445	0.951112	0.107489	0.0018983	0.197966	1.96254	0.873522	0.054078	0.0586421	0.00293859	0.606518	1748.56	31.7382	31.9744	367.314	5.17703	17.9364	636.211	10.4787	28.9596	21.0067		2021-09-10 12:31:58.075	2021-09-10 12:31:58.075	25.044	2833.13	334.66	130.54	28224.9	5150.15	2591.98	1434.18	63.1625	3.20352	20.8167	2.83004	2.20015	1424.49	184.403	72.4503	60.4663	6.62699
DO1_1_81	big grain	7.84888	0.151224	16220.2	0.168607	196.805	2.56869	24.992	1.42513	0.13566	0.00449398	0.269595	2.37455	0.751903	0.0467803	0.0409271	0.00235639	0.369806	2147.73	53.1852	53.2967	258.464	7.88217	14.5831	568.168	9.99056	26.9315	12.0343		2021-09-10 03:10:31.484	2021-09-10 03:10:31.484	25.006	1179.73	70.8084	121.758	6298.4	1690.79	2170.4	882.092	47.2201	2.83818	15.8616	2.41477	1.92842	547.55	56.8694	71.0786	91.5796	7.28708
DO1_3_64	big grain	7.11144	0.0578787	3833.02	0.368455	213.779	8.06513	12.2216	0.547261	0.144374	0.00735828	0.299609	4.12603	1.6594	0.152525	0.0828062	0.00451007	0.95476	2256.06	90.8315	90.9118	512.577	11.8946	26.5697	971.655	40.6432	52.3139	22.72		2021-09-10 05:16:32.876	2021-09-10 05:16:32.876	26.511	1290.72	112.506	139.763	4590.23	2086.58	2624.15	1289.36	74.4054	3.15193	13.7825	1.56856	2.27541	1500.96	219.054	80.1768	37.5402	7.26955
DO2_13_275	small grain	-0.687811	0.0457388	3880.24	0.197026	-2396.86	133.77	13.7643	0.731612	0.102198	0.00140655	0.213786	3.4787	1.02826	0.0631691	0.0729089	0.00365165	0.825801	1658.41	26.0177	26.3387	453.607	5.22589	21.9792	716.675	11.0646	32.8412	27.3519		2021-09-10 11:51:23.752	2021-09-10 11:51:23.752	25.069	941.911	96.8007	147.425	Below LOD	1291.43	2939.19	1047.96	76.4649	3.71259	16.2146	2.45483	2.28585	3695.81	330.947	77.8798	22.7434	3.84435
DO2_13_223	small grain	7.2894	0.0650173	5523.09	0.298721	213.723	4.09253	14.6442	0.815528	0.12987	0.00226216	0.244574	1.03441	1.24133	0.0820307	0.0690771	0.00368079	0.863213	2088.19	30.0938	30.3241	430.444	9.07851	22.2124	815.735	18.1683	37.6137	20.6132		2021-09-10 07:56:00.108	2021-09-10 07:56:00.108	25.009	1363.23	126.602	134.953	Below LOD	1398.12	2640.35	468.992	30.0258	3.23225	12.4866	1.85329	2.23857	1476.43	206.97	69.4276	28.8046	2.98978
DO2_13_260	small grain	12.103	0.0752586	7119.03	0.516866	117.115	2.08014	14.1849	0.71964	0.184768	0.00273681	0.432613	1.75685	1.80327	0.113482	0.0707683	0.0036025	0.840636	2691.64	24.5626	24.8236	440.728	6.22683	21.6806	1044.37	15.9671	40.7949	16.374		2021-09-10 11:29:22.491	2021-09-10 11:29:22.491	19.302	1469.51	125.767	152.861	Below LOD	1361.37	3006.61	1096.24	66.6416	3.90243	14.597	2.5344	2.75608	2689.51	322.059	88.7723	36.3904	5.14112
DO1_3_37	big grain	3.34855	0.0709902	6597.89	0.0935539	494.498	24.6823	15.9609	0.780775	0.100044	0.000900977	0.145532	0.745505	0.866769	0.0520077	0.0627622	0.00310882	0.894056	1622.07	16.2399	16.7198	392.382	3.34763	18.8482	633.203	7.3653	28.2223	24.1902		2021-09-10 04:35:25.005	2021-09-10 04:35:25.005	24.454	903.64	106.336	130.247	Below LOD	1474.09	2569.29	1257.58	78.7735	3.04767	3.51099	1.45605	2.15579	1093.48	159.247	67.4497	22.174	2.72847
DO1_3_82	big grain	8.87696	0.0929355	7727.87	0.0614735	169.151	4.18005	16.5741	0.858241	0.153814	0.0069222	0.300572	3.19708	1.29804	0.104107	0.060734	0.00312166	0.743795	2337.74	80.8473	80.9391	380.019	6.19182	18.9693	833.176	32.0139	46.174	16.2558		2021-09-10 05:41:20.520	2021-09-10 05:41:20.520	25.01	928.968	106.007	107.782	Below LOD	1062.35	2156.36	792.812	51.9853	2.578	3.50761	1.00225	1.68598	804.326	92.6085	61.722	37.4838	4.59396
DO1_1_32	big grain	14.6543	0.116041	4800.62	0.333837	91.6414	1.81614	10.568	0.57212	0.221726	0.00345809	0.4858	0.853754	2.89801	0.177214	0.0948534	0.00487552	0.673415	2990.79	24.3594	24.5925	584.122	9.31418	28.7648	1380.46	15.2738	46.8288	19.5307		2021-09-10 02:00:55.227	2021-09-10 02:00:55.227	9.116	2259.87	213.773	124.491	Below LOD	811.851	2268.04	586.421	24.2503	2.74364	20.6583	2.38873	1.99318	2387.41	330.172	68.5639	29.668	3.29647
DO2_13_276	small grain	6.70463	0.0605974	4942.46	0.113139	233.695	4.24464	14.4918	0.7419	0.127443	0.00290426	0.221123	1.7954	1.21777	0.0781409	0.0692748	0.00348344	0.652079	2047.57	44.3839	44.5813	431.733	5.33794	21.0098	805.814	16.1784	37.3633	21.0851		2021-09-10 11:52:33.466	2021-09-10 11:52:33.466	25.032	965.405	87.6328	129.123	Below LOD	1278.41	2548.84	1183.86	70.0767	3.26525	21.7354	3.03045	2.25149	1279.15	184.795	69.1189	18.4454	1.97035
DO2_13_76	small grain	13.3286	0.0938177	7957.44	0.383002	104.048	2.8575	15.3506	0.806721	0.201327	0.00587643	0.475063	1.79613	1.84852	0.124112	0.0661954	0.00366556	0.523062	2816.04	51.0856	51.2238	412.983	10.8009	22.0889	1057.33	21.8529	42.8912	14.6654		2021-09-10 12:29:26.096	2021-09-10 12:29:26.096	25.009	1715.6	111.121	129.838	7699.53	2730.41	2602.89	1371.54	68.3532	3.23108	239.128	28.0597	2.069	1734.65	212.506	71.563	126.187	33.9124
DO1_3_32	big grain	1.20707	0.0629737	5193.05	0.135063	1424.14	51.9126	15.1956	0.733005	0.0840425	0.000719678	0.10648	0.978506	0.765604	0.0464374	0.0660252	0.00331511	0.917407	1290.69	16.0473	16.5743	412.122	4.83788	20.0189	576.524	7.86147	26.3358	31.9303		2021-09-10 04:29:19.004	2021-09-10 04:29:19.004	25.003	1114.17	92.637	148.34	Below LOD	994.78	2909.29	350.196	23.7303	3.43284	47.427	16.8486	2.50646	3009.08	471.642	78.8419	12.0373	1.51398
610_1	G_NIST610	52.0335	0.0225824	453.2	-1.06449	17.2467	0.91585	4.41957	0.223537	0.914564	0.00272766	2.18267	0.212612	28.6518	1.71068	0.226556	0.0114866	0.61408	4625.05	0	0	1316.28	8.82906	60.352	3441.01	7.58728	58.5808	28.4598		2021-09-09 20:25:52.341	2021-09-09 20:25:52.341	25.011	398.597	80.6542	167.936	79880.4	4242.85	2198.42	446.152	17.9867	2.4214	437.075	19.656	1.83559	492.089	52.3162	54.6297	498.17	24.2373
610_2	G_NIST610		0.022606	464.972	-2.52512	17.1449	0.716728	4.48081	0.224296	0.915062	0.0026998	2.18794	0.0484673	28.3182	1.68235	0.22343	0.0112602	0.959634				1299.85	8.29634	59.2891	3429.6	7.0623	58.085			2021-09-09 20:26:52.415	2021-09-09 20:26:52.415	25.034	399.022	82.7634	156.377	80945.6	3967.76	2071.74	460.281	21.7691	2.32846	449.999	22.8679	1.77825	429.069	57.9912	53.0296	517.024	22.6637
610_3	G_NIST610		0.0219627	455.434	0.702231	17.2848	0.827454	4.32371	0.212197	0.911203	0.00243877	2.18793	0.0533592	29.0453	1.68696	0.231434	0.0113199	0.956133				1341.93	6.40989	59.2733	3454.73	5.33627	57.1046			2021-09-09 21:00:30.424	2021-09-09 21:00:30.424	25.002	382.198	102.178	157.248	82387.3	5306.68	2201.43	450.516	19.1404	2.64281	448.404	17.8731	1.83909	463.813	53.1229	61.0921	502.903	21.8908
610_4	G_NIST610	47.1874	0.0130413	468.778	1.42643	17.4862	4.32986	4.38958	0.215581	0.860089	0.0623666	2.17479	0.275145	27.0149	2.47712	0.227822	0.011158	-0.179815	4877.63	242.996	243.102	1323.07	7.16373	58.5976	3380.75	74.2135	95.6515	27.1253		2021-09-09 21:29:06.879	2021-09-09 21:29:06.879	25.056	379.889	86.4913	139.615	82002.9	4784.92	2234.47	452.701	14.7761	2.42394	451.977	14.8905	1.77909	431.549	60.4563	60.2981	520.135	21.8385
610_5	G_NIST610	46.0871	0.021237	454.882	0.752794	17.5487	0.904417	4.40099	0.216491	0.911165	0.00353919	2.1727	0.295084	28.4312	1.66211	0.227522	0.0111888	0.69396	4934.65	74.0096	88.7254	1321.35	9.00865	58.7517	3433.24	8.6122	57.7637	26.777		2021-09-09 21:58:00.522	2021-09-09 21:58:00.522	25.01	446.035	79.2951	144.9	84227.3	4769.75	2399.46	462.258	15.078	2.67459	459.492	15.8937	2.00777	460.715	50.7459	63.4805	520.388	18.2518
610_6	G_NIST610	47.4139	0.0204411	461.892	0.790475	17.2456	0.860564	4.39673	0.216521	0.911974	0.00286808	2.17584	0.269823	28.4779	1.67138	0.227849	0.0112992	0.7643	4903.6	96.3479	131.596	1323.02	10.5227	59.2718	3434.85	8.56753	57.8003	26.9805		2021-09-09 22:31:27.940	2021-09-09 22:31:27.940	25.009	467.902	55.4325	159.74	83436	4606.08	2611.41	454.995	19.146	3.14617	458.113	18.0589	2.28673	447.446	60.2491	73.0178	522.043	19.6736
610_7	G_NIST610		0.0199803	454.774	0.612806	17.4223	0.964243	4.30436	0.214578	0.913427	0.00247261	2.18948	0.0468145	29.2618	1.71822	0.232531	0.0114922	0.966943				1347.65	7.5197	60.1515	3461.87	6.40847	57.8647			2021-09-09 23:01:32.717	2021-09-09 23:01:32.717	25.043	435.75	70.5945	135.57	79136.6	5236.78	2251.63	440.757	17.5936	2.68909	436.082	17.7307	1.85848	458.026	53.7832	61.351	504.417	20.9737
610_8	G_NIST610		0.0195004	463.592	1.06738	17.2507	0.821779	4.36513	0.213374	0.913199	0.00242388	2.18853	0.0575602	28.8811	1.67045	0.229355	0.0111741	0.978013				1330.99	8.45703	58.6077	3448.87	7.28187	56.9147			2021-09-09 23:29:49.928	2021-09-09 23:29:49.928	25.062	377.143	60.0538	135.628	83090.9	5406.32	2317.77	458.624	18.5854	2.71073	456.382	17.6664	1.98336	441.807	61.5691	65.8931	516.841	21.8184
610_9	G_NIST610		0.018479	446.596	1.4232	16.9617	0.886403	4.29946	0.213631	0.913507	0.00259231	2.18917	0.0522599	29.2669	1.70643	0.232829	0.0114433	0.960543				1349.19	8.06139	59.8924	3462.02	6.52181	57.4176			2021-09-09 23:57:46.142	2021-09-09 23:57:46.142	25.052	341.305	80.9025	126.325	78970.1	5440.05	2257.92	435.853	18.7281	2.59939	444.246	24.149	1.8778	480.326	58.2504	57.0155	503.966	27.7263
610_10	G_NIST610		0.0186557	466.042	0.860556	17.3352	0.967088	4.26446	0.210848	0.914117	0.00254688	2.19003	0.0614071	29.5455	1.71681	0.234745	0.0114861	0.967143				1359.2	8.18794	60.0206	3471.26	6.90563	57.2507			2021-09-10 00:30:30.948	2021-09-10 00:30:30.948	25.034	469.341	78.7471	144.071	85355.8	5035.3	2503.15	473.217	18.5494	3.04135	460.158	16.6795	2.02562	530.379	58.4273	65.039	540.841	28.7036
610_11	G_NIST610		0.018648	454.38	0.871519	17.2006	0.880753	4.41558	0.221109	0.915669	0.00260581	2.19017	0.0562856	28.6491	1.67708	0.226838	0.0111886	0.975808				1317.73	9.87948	58.8674	3440.7	8.74774	57.9046			2021-09-10 00:59:19.181	2021-09-10 00:59:19.181	25.031	379.331	71.7616	144.869	84573	6485.33	2460.1	454.614	20.9959	3.06616	453.031	17.0358	2.19115	465.229	58.5918	66.205	516.56	26.4052
610_12	G_NIST610		0.0182464	460.89	0.942465	16.9861	0.788681	4.29556	0.21426	0.913477	0.0025637	2.18785	0.0609741	29.3387	1.71641	0.233154	0.0115023	0.973795				1350.83	9.77256	60.1873	3464.13	8.27004	57.9732			2021-09-10 01:25:15.510	2021-09-10 01:25:15.510	25.05	380.583	80.4847	131.745	81348.1	5304.25	2381.76	450.97	16.9408	2.88342	450.063	17.1023	2.04443	425.958	65.8317	67.5826	509.507	17.7853
610_13	G_NIST610		0.0185518	456.819	1.19322	17.1996	0.95869	4.33848	0.21524	0.915142	0.00268249	2.18932	0.0595096	29.1068	1.69284	0.230746	0.0113002	0.961039				1338.29	8.17482	59.2555	3456.55	7.09639	57.5787			2021-09-10 01:58:21.158	2021-09-10 01:58:21.158	25.135	408.902	78.415	125.166	82560	5337.81	2315.78	443.148	18.7962	2.79931	438.378	18.0692	1.82689	424.703	53.3856	68.4532	503.91	25.4535
610_14	G_NIST610		0.0183481	468.286	0.65511	17.4232	0.92698	4.15591	0.208372	0.914661	0.00260346	2.18838	0.056704	30.3541	1.77995	0.240829	0.0118976	0.954218				1390.9	7.57421	61.8962	3497.91	6.1576	58.1467			2021-09-10 02:26:57.595	2021-09-10 02:26:57.595	25.009	469.749	79.2463	146.688	84490.2	5192.2	2682.2	465.746	21.3042	3.35428	468.496	22.4642	2.35085	443.723	70.648	83.3218	535.461	27.6989
610_15	G_NIST610		0.0184248	455.481	0.871719	17.2472	0.937056	4.24219	0.2079	0.915868	0.0024818	2.18952	0.0543562	29.7949	1.72617	0.235955	0.0114998	0.963177				1365.52	7.87343	60.0081	3479.55	6.71226	57.1205			2021-09-10 02:55:27.000	2021-09-10 02:55:27.000	25.012	346.938	80.0983	127.882	78432.5	4230.99	2411.63	452.675	18.0915	2.92859	436.661	17.2188	1.91129	414.77	55.5065	68.9119	507.136	17.9769
610_16	G_NIST610		0.0185126	462.803	1.00795	17.0547	0.845556	4.64443	0.233147	0.915016	0.00263494	2.19004	0.0624807	27.1856	1.58135	0.21547	0.0105514	0.949366				1257.82	6.31934	56.0765	3389.76	5.97796	57.6171			2021-09-10 03:24:18.190	2021-09-10 03:24:18.190	25.03	401.748	72.4959	126.427	85083.2	6639.59	2406.43	450.819	19.6065	2.87463	453.102	21.1454	2.03388	448.265	54.8424	67.9738	511.191	23.4826
610_17	G_NIST610		0.0191438	456.174	0.650799	17.3251	0.691804	4.17369	0.200139	0.914908	0.00255996	2.18877	0.0545615	30.25	1.76948	0.239587	0.0118084	0.971609				1384.42	8.39756	61.5233	3494.42	6.93988	58.0022			2021-09-10 03:58:08.556	2021-09-10 03:58:08.556	25.014	438.374	69.6831	117.06	78404.6	4323.25	2129.13	442.116	17.24	2.68972	430.1	16.4428	1.90259	454.6	65.37	64.0158	497.253	20.2202
610_18	G_NIST610		0.019102	463.134	1.61783	17.3204	0.96889	4.30947	0.212531	0.914376	0.00259275	2.18991	0.0550278	29.2614	1.70986	0.232284	0.0114424	0.96405				1346.34	8.04292	59.8604	3461.79	6.84025	57.5052			2021-09-10 04:26:50.938	2021-09-10 04:26:50.938	25.046	427.707	81.3622	121.579	83215	5640.72	2238.43	464.508	17.7479	2.87733	459.117	12.7566	2.0442	434.864	61.22	68.1375	527.272	20.4242
610_20	G_NIST610		0.0189506	457.077	1.40263	17.2212	0.760082	4.27722	0.211195	0.914191	0.00285106	2.1895	0.0582355	29.433	1.70816	0.233995	0.011425	0.94042				1355.3	7.3055	59.742	3467.58	6.51555	57.3716			2021-09-10 04:54:34.122	2021-09-10 04:54:34.122	25.013	452.54	70.8295	138.139	85346.5	4204.48	2706.5	459.183	20.3912	3.37566	456.621	20.5256	2.40675	457.421	71.2824	75.6022	519.791	25.8902
610_21	G_NIST610		0.0194182	463.936	0.885675	17.2524	0.844826	4.15132	0.203314	0.913392	0.00267259	2.18754	0.0595243	30.3384	1.77138	0.241183	0.0118472	0.968948				1392.69	9.06186	61.5091	3497.15	7.71359	57.3595			2021-09-10 05:25:40.412	2021-09-10 05:25:40.412	25.065	360.651	68.7238	124.938	80511.3	4827.33	2533.52	454.518	21.9187	3.02647	455.731	21.6303	2.03005	458.526	56.4326	64.9864	518.172	18.1952
610_22	G_NIST610		0.0204288	454.496	0.757332	17.3894	0.734027	4.28912	0.209887	0.912706	0.00258411	2.18961	0.0477738	29.3434	1.69995	0.233315	0.011379	0.951165				1351.77	6.7567	59.492	3464.68	5.84134	57.1794			2021-09-10 05:53:50.527	2021-09-10 05:53:50.527	25.01	427.126	73.3858	108.26	77829.2	4414.42	2088.23	439.016	16.6807	2.55783	443.992	17.6191	1.73108	435.143	49.8528	57.8084	496.737	20.7864
610_23	G_NIST610		0.0197725	466.518	1.58928	17.3338	0.840212	4.2688	0.214574	0.914261	0.00256269	2.18857	0.0614099	29.5602	1.73445	0.234725	0.01163	0.981871				1358.99	11.2747	60.7964	3471.31	9.31918	58.0227			2021-09-10 06:19:56.529	2021-09-10 06:19:56.529	25.004	388.542	66.1376	118.539	83421.4	4993.29	2432.18	460.855	21.0853	2.87569	454.748	18.32	1.95453	482.494	56.7865	65.7046	530.939	24.8404
610_24	G_NIST610	46.4996	0.0200537	457.135	0.968747	17.2172	0.840302	4.40279	0.213607	0.911771	0.00287103	2.187	0.0825821	28.5143	1.66331	0.227343	0.0111525	0.908199	4963.12	0	0	1320.45	7.59411	58.5139	3436.36	7.12768	57.2155	26.6053		2021-09-10 06:47:55.157	2021-09-10 06:47:55.157	25.166	428.172	62.3417	154.337	82189	3985	2984.2	462.684	17.4151	3.72929	447.345	15.8864	2.73989	485.16	57.3157	85.3474	504.677	18.3772
610_25	G_NIST610		0.0197308	457.795	0.678359	17.2221	1.03041	4.48074	0.219196	0.913299	0.00267771	2.1902	0.0542816	28.1224	1.64202	0.223531	0.0110023	0.97283				1300.34	9.6908	57.9304	3422.55	8.42335	57.0689			2021-09-10 07:22:52.155	2021-09-10 07:22:52.155	25.136	455.93	72.913	112.716	80948.1	4462.48	2140.58	445.021	19.4506	2.69367	445.295	22.8072	2.58425	474.234	59.0968	56.7829	506.736	26.8213
610_26	G_NIST610		0.025181	463.312	2.10179	17.2839	0.955828	4.17358	0.20713	0.911907	0.00265672	2.18908	0.0427881	30.1515	1.75627	0.239677	0.0117438	0.942346				1384.98	6.45859	61.1402	3491.57	5.76736	57.5038			2021-09-10 07:52:09.239	2021-09-10 07:52:09.239	25.029	382.084	55.7988	123.783	79273.9	3956.97	2437.07	459.072	21.786	2.96446	453.351	22.1502	1.95706	454.972	55.295	63.7293	508.846	21.0568
610_27	G_NIST610	46.9039	0.0207045	457.708	1.69503	17.3751	0.89738	4.45454	0.219694	0.910915	0.00262837	2.18378	0.167241	28.2627	1.64678	0.224738	0.0110366	0.905868	4913.08	62.1432	92.7599	1306.74	8.12615	58.1069	3427.7	6.93657	57.2346	26.5972		2021-09-10 08:21:03.305	2021-09-10 08:21:03.305	25.048	425.108	59.0491	108.007	83768.7	5021.95	2110.81	449.049	17.4995	2.64471	449.532	18.554	1.77376	457.032	52.2324	59.9518	509.341	17.9458
610_28	G_NIST610	47.0239	0.0210941	463.306	0.894684	17.2917	0.856884	4.26765	0.20845	0.913448	0.00251538	2.1853	0.133626	29.5313	1.71332	0.234557	0.0114645	0.969416	4919.48	0	0	1358.22	8.02895	59.855	3470.82	6.70487	57.0308	27.6091		2021-09-10 08:53:32.369	2021-09-10 08:53:32.369	25.022	374.583	71.2716	108.543	82870.8	4073.09	2139.04	449.562	16.9204	2.68484	450.31	18.7412	1.83963	452.879	55.2501	59.9633	522.193	21.7362
610_29	G_NIST610		0.0201902	457.235	0.907027	17.1812	0.751902	4.25471	0.209584	0.912847	0.00232605	2.18967	0.0484031	29.5816	1.73207	0.235307	0.0116064	0.981121				1362.12	8.6914	60.5545	3472.4	7.29725	57.5176			2021-09-10 09:21:56.362	2021-09-10 09:21:56.362	25.051	422.344	68.6045	115.616	83916.6	5037.15	2263.86	454.611	15.7326	2.78021	454.311	14.2283	1.89641	477.593	54.8205	60.5383	514.909	15.443
610_30	G_NIST610	50.1874	0.0204623	466.282	0.939655	17.3412	0.927459	4.4107	0.214989	0.912784	0.00336659	2.17927	0.343394	28.6235	1.66802	0.226974	0.0111425	0.970305	4719.91	440.714	541.416	1318.5	8.23749	58.495	3440.1	7.17014	57.1114	27.9348		2021-09-10 09:50:35.252	2021-09-10 09:50:35.252	25.026	418.713	68.5533	112.742	80985.3	5013.76	2250.4	462.456	20.1393	2.61727	458.081	20.1792	1.82755	454.06	57.8496	60.9856	527.81	25.8712
610_31	G_NIST610		0.0203494	456.855	0.796448	17.4098	0.792398	4.35575	0.212284	0.91316	0.00240767	2.18856	0.0485637	28.9393	1.68351	0.229797	0.0112541	0.969019				1333.33	7.65807	58.9615	3450.99	6.40801	57.0859			2021-09-10 10:19:21.410	2021-09-10 10:19:21.410	25.012	428.053	55.0878	130.574	82522.6	4257.78	2380.1	450.109	18.814	3.18001	440.069	14.1045	2.14496	435.947	60.2476	73.7104	518.354	20.4115
610_32	G_NIST610	52.9488	0.0205943	461.229	0.805648	17.5869	1.34882	4.46177	0.219852	0.911468	0.00346264	2.17239	0.545316	28.1989	1.65317	0.224508	0.0111102	0.05636	4506.36	920.844	1115.04	1305.47	10.1304	58.4542	3425.19	8.60096	57.6235	28.9694		2021-09-10 10:52:27.346	2021-09-10 10:52:27.346	25.009	403.807	51.0279	131.369	83004.6	4044.23	2585.22	454.073	18.7469	3.21514	459.95	20.7164	2.28639	436.317	34.9723	70.4205	512.42	24.1252
610_34	G_NIST610		0.0206901	459.553	0.674124	17.1298	0.707507	4.43809	0.216551	0.91242	0.00250165	2.18806	0.0618642	28.3805	1.65589	0.225608	0.0110813	0.976465				1311.3	8.78815	58.2424	3431.66	7.66122	57.0823			2021-09-10 11:48:55.731	2021-09-10 11:48:55.731	25.01	394.079	52.501	102.945	80524.4	4465.11	2091.74	447.898	18.1082	2.56819	451.456	16.4237	1.64509	472.275	53.7689	57.1725	510.62	23.9565
610_35	G_NIST610		0.0200126	458.858	-0.0553041	17.2145	0.893633	4.66804	0.230829	0.912422	0.00244731	2.18807	0.0614176	27.4936	1.59601	0.214443	0.0105002	0.965851				1252.34	7.5426	55.7786	3400.71	6.60011	57.1081			2021-09-10 12:21:06.714	2021-09-10 12:21:06.714	25.015	381.79	69.809	114.325	82030.4	5208.94	2296.95	453.412	18.825	2.81604	447.883	19.5629	1.91049	466.321	52.7517	62.1474	507.502	21.7648
610_36	G_NIST610		0.0213991	464.928	0.90614	17.0879	0.72251	4.17229	0.17629	0.912252	0.00237811	2.1879	0.0480848	30.0835	1.53486	0.239932	0.0101437	0.976042				1386.21	8.4006	52.7293	3488.98	6.98642	50.1735			2021-09-10 12:37:59.173	2021-09-10 12:37:59.173	25.003	402.446	47.1032	116.207	82027.8	4378.33	2363.2	457.407	16.2527	2.8217	452.126	17.6656	1.96577	478.935	45.3543	61.5041	515.569	18.0196
610_37	G_NIST610		0.0213249	453.446	0.888594	17.3347	0.761354	3.92758	0.150519	0.913397	0.00254971	2.18941	0.0496494	31.8785	1.52986	0.25471	0.00985017	0.919819				1462.67	5.37504	50.5588	3546.32	4.45194	47.1456			2021-09-10 12:38:59.270	2021-09-10 12:38:59.270	25.062	483.948	72.2209	24.9769	80908	3982.21	1378.32	449.572	20.083	1.5911	446.82	17.9514	1.72679	436.649	58.509	99.0739	510.149	21.5217
612_1	G_NIST612	14.8318	0.0016657	38.3421	-5.69778	53.4245	40.5569	4.05482	0.197398	0.918741	0.0105849	2.19242	0.564891	31.487	1.85327	0.247065	0.0124685	0.618857	4991.7	5.73415	5.83594	1425.53	16.5154	61.5782	3534.75	10.4219	55.7094	28.558		2021-09-09 20:31:34.083	2021-09-09 20:31:34.083	25.038	Below LOD	79.6664	200.711	86625.1	6280.61	2789.62	62.274	4.40578	3.0874	36.7808	3.20462	2.28987	173.648	43.0867	64.9156	80.2199	6.09203
612_2	G_NIST612	48.5108	0.00137575	36.8116	0.808865	16.7176	56.6462	3.67667	0.19095	0.912296	0.0143227	2.17854	0.716351	34.1584	2.0261	0.273236	0.0138137	0.379167	4926.93	27.3962	27.6549	1556.54	19.1266	70.0541	3612.69	13.035	59.9009	31.5925		2021-09-09 22:16:16.244	2021-09-09 22:16:16.244	25.187	Below LOD	97.8775	181.117	84572.8	7623.33	2989.28	57.7064	6.15424	3.43962	37.2022	3.6791	2.60055	193.809	56.159	84.8233	77.9063	6.50391
612_3	G_NIST612	39.9532	0.00126554	35.4527	1.3397	20.8367	39.0245	3.67093	0.194718	0.913978	0.0171241	2.1845	1.00224	34.2956	2.03773	0.274129	0.0140428	0.562313	4932.03	27.4114	27.5923	1560.81	22.3923	71.1547	3616.41	13.8929	60.8682	31.6465		2021-09-10 00:02:05.704	2021-09-10 00:02:05.704	25.003	Below LOD	86.4083	174.455	75066.1	7741.3	3020.83	51.6193	5.54103	3.5864	37.6012	4.13401	2.59384	123.485	61.8099	78.9436	71.4593	6.73359
612_4	G_NIST612	82.7819	0.00120594	37.5528	0.727608	9.84666	73.0741	3.75129	0.183125	0.92071	0.0179077	2.21679	1.1973	33.8524	2.00909	0.267302	0.0136899	0.162705	4930.85	28.2356	28.4085	1526.22	21.9191	69.7716	3606.12	12.6467	56.7815	30.9525		2021-09-10 01:43:27.331	2021-09-10 01:43:27.331	25.02	Below LOD	109.491	226.15	76747.1	8267.02	4084.07	55.3206	6.01327	4.85822	38.1286	4.56155	3.55205	157.308	59.3558	116.492	72.0791	8.25775
612_5	G_NIST612	-43.9311	0.00121128	38.0714	0.947756	-19.0079	159.946	3.97403	0.212286	0.910646	0.0155611	2.15716	1.14535	31.7755	1.88109	0.253383	0.0130396	0.574893	4917.97	34.9046	35.1822	1455.01	22.1689	67.1875	3536.39	16.4421	74.0455	29.5856		2021-09-10 03:28:37.887	2021-09-10 03:28:37.887	25.009	Below LOD	95.2626	177.129	72331.3	6319.44	3251.89	52.9331	5.37582	4.14696	34.983	4.00896	2.88344	169.936	59.7232	93.061	72.2694	6.13446
612_6	G_NIST612	129.407	0.00133569	38.2531	0.7666	6.26074	156.283	3.74105	0.185182	0.927334	0.0156421	2.22788	0.771679	34.2409	2.0116	0.267983	0.0135813	0.250933	4929.72	29.6639	29.9061	1529.85	19.7897	69.1452	3615.69	10.8007	59.0579	31.0332		2021-09-10 05:11:50.424	2021-09-10 05:11:50.424	25.027	Below LOD	103.102	193.089	87164	6835.91	3843.25	55.3025	4.68273	4.61355	42.3539	3.81539	3.02437	159.813	44.9399	108.7	82.8684	6.16463
612_7	G_NIST612	56.6489	0.00141807	38.3793	0.689942	15.0551	111.039	3.85928	0.211422	0.909731	0.0171157	2.16362	1.12736	32.5249	1.93282	0.261046	0.0134731	-0.391796	4917.49	27.1866	27.3646	1494.22	23.2753	69.1902	3564.15	13.8746	59.8434	30.3858		2021-09-10 06:52:14.507	2021-09-10 06:52:14.507	25.021	Below LOD	73.3052	144.488	89220.5	9275.16	2822.31	56.7278	4.23129	3.4386	41.6932	4.24927	2.42038	207.972	60.1743	72.9559	78.7816	6.23336
612_8	G_NIST612	21.5935	0.0015209	34.99	0.673284	37.4405	83.6315	3.85503	0.187837	0.917757	0.0111584	2.19359	0.672119	32.7312	1.92174	0.259802	0.0130644	0.34905	4935.69	68.9089	70.0043	1491.22	16.6013	63.5201	3571.24	10.712	58.8017	30.2131		2021-09-10 08:39:02.987	2021-09-10 08:39:02.987	25.009	Below LOD	68.1048	128.736	81556	7496.03	2553.53	52.2519	4.31044	3.2059	36.5674	3.24244	1.98495	148.493	49.8624	67.6841	73.5345	6.39017
612_9	G_NIST612	33.7917	0.00142462	35.9323	0.800408	23.8867	42.9675	3.80608	0.198865	0.910691	0.0152935	2.196	0.746115	33.0943	1.94487	0.264177	0.0134519	0.154546	4940.21	17.7996	17.9462	1510.43	20.4388	68.7086	3582.22	10.2672	58.2274	30.5741		2021-09-10 10:23:40.941	2021-09-10 10:23:40.941	25.003	Below LOD	68.0702	138.231	82781.6	7362.76	2618.01	53.5051	4.8961	3.32137	38.3586	3.41237	2.17585	174.475	40.4715	74.689	71.5373	4.81475
612_10	G_NIST612	19.7154	0.00147065	43.5654	0.882719	45.4999	38.1001	4.05526	0.317707	0.914779	0.013358	2.16012	1.22554	31.5249	1.86312	0.249932	0.0127111	0.875207	4626.29	465.139	470.227	1437.5	18.5593	65.6376	3527.37	17.3227	92.9812	31.0724		2021-09-10 12:06:27.131	2021-09-10 12:06:27.131	25.155	Below LOD	67.7817	129.437	86111.7	7496.07	2547.6	51.7191	4.72314	3.19827	38.2707	3.47432	2.08567	163.466	42.1965	70.8619	78.1778	7.6131
91500_1	Z_91500	-38.1825	0.00375449	68.1237	-1.66135	-45.995	53.741	5.93919	0.288076	0.0765958	0.00240408	0.110654	2.24972	1.79228	0.117323	0.168491	0.00821849	-0.00796638	1079.75	63.6746	63.8235	1003.75	5.11883	45.3161	1038.07	20.0426	42.7955	92.961		2021-09-09 20:29:02.168	2021-09-09 20:29:02.168	25.045	Below LOD	54.4388	102.198	Below LOD	636.008	1341.28	233.777	10.8489	1.54327	3.95124	0.97178	1.21828	Below LOD	17.1183	34.2709	0.131949	0.0832747
91500_2	Z_91500	-23.4115	0.00346548	66.8884	0.292907	-75.1859	60.7687	5.68504	0.277855	0.075829	0.00252205	0.106746	2.36071	1.8386	0.122164	0.175997	0.00859913	-0.0431479	1056.09	67.2687	67.4086	1045.03	4.68375	47.1349	1054.13	21.3354	43.3542	98.9529		2021-09-09 22:14:15.958	2021-09-09 22:14:15.958	25.014	Below LOD	36.5021	112.173	Below LOD	952.428	1809.11	225.984	10.2043	2.09334	3.47984	0.803795	1.61281	Below LOD	16.7921	50.0367	0.201499	0.108353
91500_3	Z_91500	-12.1214	0.00328688	67.8036	0.496152	-145.768	72.6818	5.80997	0.29688	0.0746157	0.00265397	0.112948	2.28179	1.76689	0.119118	0.172087	0.00841424	-0.0828838	1016.18	75.1118	75.2484	1023.56	4.89065	46.279	1027.46	22.7297	44.2471	100.726		2021-09-10 00:00:05.395	2021-09-10 00:00:05.395	25.085	Below LOD	35.7547	92.0891	Below LOD	690.221	1676.05	226.218	9.47301	1.90501	4.12269	0.804248	1.33001	Below LOD	17.2067	42.5934	0.0486863	0.0543221
91500_4	Z_91500	127.193	0.00330768	69.7515	0.252745	13.8746	423.48	5.8647	0.285641	0.0745275	0.00247589	0.108957	2.56688	1.75192	0.116494	0.170611	0.0083332	-0.00338897	1040.84	67.5152	67.656	1015.44	4.71615	45.8765	1025.8	22.0996	44.7899	97.5594		2021-09-10 01:41:26.997	2021-09-10 01:41:26.997	25.034	Below LOD	31.4672	92.0954	Below LOD	646.536	1720.59	233.891	13.9978	1.95827	4.66172	0.885405	1.41813	Below LOD	21.3581	47.9161	0.159456	0.110899
91500_5	Z_91500	-141.724	0.00329744	66.3313	0.340301	-12.4985	194.478	6.35282	0.326021	0.0740918	0.00295034	0.111674	2.09176	1.60877	0.11286	0.157378	0.00769019	0.0718152	1019.84	77.7156	77.8283	942.158	4.30865	42.8499	966.344	25.4493	44.9652	92.3833		2021-09-10 03:26:37.543	2021-09-10 03:26:37.543	25.051	Below LOD	37.6203	81.7716	Below LOD	620.527	1521.1	219.957	12.2086	1.92156	4.39658	0.884189	1.40524	Below LOD	19.7324	44.441	0.17559	0.087999
91500_6	Z_91500	-20.3704	0.00328435	66.8636	0.282094	-86.3944	43.257	5.69513	0.278875	0.0759213	0.00277527	0.108519	2.8001	1.8306	0.125501	0.17572	0.00860599	0.152562	1058.02	80.6916	80.8305	1043.5	5.46612	47.1765	1053.42	25.6879	47.8501	98.6276		2021-09-10 05:09:49.989	2021-09-10 05:09:49.989	25.014	Below LOD	52.1902	83.6413	Below LOD	734.445	1700.96	232.592	13.3338	1.94185	3.69975	0.882018	1.3049	Below LOD	19.3947	43.6968	Below LOD	0.0725464
91500_7	Z_91500	-31.153	0.0032815	66.7633	0.285543	-56.6538	86.3812	5.79578	0.285822	0.0750554	0.00269855	0.107968	2.50053	1.7835	0.12025	0.172651	0.00844245	-0.148041	1028.01	74.6821	74.8151	1026.65	4.95768	46.4316	1033.54	22.6763	44.1332	99.868		2021-09-10 06:50:14.089	2021-09-10 06:50:14.089	25.156	Below LOD	36.2945	81.5889	Below LOD	697.26	1627.47	231.828	10.5272	1.95601	4.04589	0.883487	1.34752	Below LOD	22.0397	40.6815	0.117377	0.0852567
91500_8	Z_91500	-218.285	0.00331134	65.8544	0.245984	-8.06544	240.674	5.82579	0.716687	0.0759369	0.00303121	0.114276	3.50712	1.79876	0.12861	0.172764	0.00846683	0.222746	1071.57	82.2298	82.3485	1027.28	4.79474	46.5369	1041.03	26.5512	45.1905	95.8671		2021-09-10 08:37:02.302	2021-09-10 08:37:02.302	25.033	Below LOD	31.9735	81.7783	Below LOD	544.181	1547.84	232.613	11.8161	1.98504	4.4681	0.878229	1.31877	Below LOD	17.2312	44.7882	0.149765	0.0905979
91500_9	Z_91500	-38.8395	0.00323708	66.7468	0.285952	-45.4104	173.065	5.69858	0.282528	0.0753225	0.00264093	0.11064	2.16676	1.82342	0.122532	0.175596	0.00858794	-0.0413612	1062.41	66.2845	66.4086	1042.82	5.0181	47.1344	1051.77	21.7632	42.7542	98.156		2021-09-10 10:21:40.533	2021-09-10 10:21:40.533	25.003	Below LOD	38.6355	85.5186	Below LOD	689.406	1630.16	238.19	13.1761	2.02328	4.47958	0.975569	1.38776	Below LOD	19.8492	44.7506	Below LOD	0.0754651
91500_10	Z_91500	19.2417	0.00317552	67.3253	0.352853	91.5885	64.0824	5.83118	0.284257	0.0762993	0.0031133	0.104037	2.49418	1.8066	0.128052	0.171692	0.00839429	0.109346	1064.33	83.4559	83.5712	1021.34	6.65946	46.1659	1043.99	26.0822	45.1191	95.9615		2021-09-10 12:04:26.533	2021-09-10 12:04:26.533	25.277	Below LOD	30.5311	81.8749	Below LOD	841.627	1747.1	239.37	12.8833	2.08941	4.01024	0.908312	1.35508	Below LOD	22.987	44.81	0.133167	0.0871406
DM18-1_1	Z_DM18-1	-15.0118	0.0157287	125.817	-3.60089	-94.6073	232.046	2.05189	0.0983325	0.183115	0.000795276	0.268755	0.218978	12.3797	0.713279	0.487379	0.0233379	0.161835	2680.22	6.23912	7.17269	2559.31	3.00895	101.16	2633.5	3.50684	54.1203	95.4887		2021-09-09 20:28:02.004	2021-09-09 20:28:02.004	25.049	171.021	48.3883	142.609	Below LOD	980.776	1818.58	271.66	11.672	2.07149	19.4976	1.61735	1.67119	Below LOD	18.6019	46.8928	0.302489	0.15908
DM18-1_2	Z_DM18-1	4.94172	0.0329804	241.939	0.635864	287.381	187.689	1.92033	0.0929674	0.183124	0.000584591	0.221548	0.362978	13.1459	0.762018	0.520766	0.0254128	0.607731	2680.5	3.92321	5.29077	2702.41	3.03997	107.574	2690.1	2.64557	54.6091	100.817		2021-09-09 22:13:15.785	2021-09-09 22:13:15.785	25.018	270.575	52.4334	111.288	Below LOD	735.752	1810.59	257.924	12.0606	2.14616	11.5465	1.43609	1.57123	Below LOD	21.0179	49.8745	0.277997	0.125413
DM18-1_3	Z_DM18-1	2.82153	0.0162055	145.514	1.72694	503.027	86.8576	1.98391	0.0962166	0.183538	0.000841068	0.359958	0.170937	12.7327	0.738588	0.504119	0.0246259	0.339733	2684	6.67609	7.55231	2631.43	5.01665	105.411	2659.9	3.93821	54.5305	98.0414		2021-09-09 23:59:05.227	2021-09-09 23:59:05.227	25.026	248.186	53.3037	118.142	Below LOD	1075.2	1996.08	260.688	12.2657	2.41788	23.5766	1.95424	1.76319	2034.42	158.179	55.039	1.07957	0.317198
DM18-1_4	Z_DM18-1	34.7742	0.0165131	156.732	0.795044	40.8418	606.276	1.98878	0.0967187	0.182993	0.000773976	0.323237	0.203985	12.6829	0.73683	0.502893	0.0246487	0.468788	2679.14	6.02526	6.98798	2626.16	5.38698	105.584	2656.23	3.82184	54.5095	98.0225		2021-09-10 01:40:26.823	2021-09-10 01:40:26.823	25.004	173.216	51.3491	120.101	Below LOD	1021.6	2109.06	259.611	13.5063	2.64046	17.4755	1.77809	1.89796	Below LOD	21.9524	60.107	0.364986	0.186162
DM18-1_5	Z_DM18-1	-2.46434	0.0233383	209.441	0.73929	-576.308	150.373	2.10212	0.100451	0.183106	0.000691934	0.222512	0.188454	12.0123	0.694081	0.475784	0.0229938	0.526493	2680.25	5.14717	6.24881	2508.82	5.34439	100.253	2605.24	3.33644	54.1645	93.6042		2021-09-10 03:25:37.401	2021-09-10 03:25:37.401	25.073	224.505	50.385	110.264	Below LOD	1110.7	2187.61	243.808	15.2329	2.52565	12.3994	1.33135	1.75243	Below LOD	23.1822	58.1489	0.29399	0.13887
DM18-1_6	Z_DM18-1	0.011787	0.0158124	150.577	0.81883	120739	100.347	1.98689	0.0965797	0.181795	0.000824921	0.289431	0.281072	12.6289	0.730625	0.503405	0.0243522	0.623814	2668.21	6.62862	7.51934	2628.34	6.50553	104.497	2652.11	4.83143	54.4576	98.5055		2021-09-10 05:08:49.894	2021-09-10 05:08:49.894	25.017	167.496	54.7813	126.584	Below LOD	977.299	2439.78	279.171	18.3711	2.99153	15.588	1.89844	2.06404	Below LOD	24.057	70.5651	0.539385	0.260145
DM18-1_7	Z_DM18-1	-2.67075	0.00750031	75.3882	0.734413	-531.91	61.9108	1.99852	0.0979425	0.183003	0.00118946	0.245277	0.717759	12.5952	0.73446	0.5005	0.0243744	0.750171	2678.69	10.1333	10.7331	2615.85	7.20271	104.82	2650.79	6.4745	50.7768	97.6541		2021-09-10 06:49:13.960	2021-09-10 06:49:13.960	25.01	167.315	58.8387	112.52	Below LOD	1029.19	2193.8	272.093	13.6083	2.6229	17.241	1.42755	1.93237	Below LOD	28.6151	57.3293	0.438977	0.193024
DM18-1_8	Z_DM18-1	-2.02371	0.0201237	165.3	0.753984	-702.464	69.9049	1.99161	0.095003	0.182491	0.000723592	0.301489	0.17787	12.6342	0.729841	0.502193	0.0241767	0.603758	2674.65	5.52526	6.56642	2623.15	5.81212	103.587	2652.59	3.92336	54.278	98.0747		2021-09-10 08:36:02.142	2021-09-10 08:36:02.142	25.014	229.206	54.6792	106.476	Below LOD	781.866	2000.44	260.056	14.2142	2.61902	16.1275	1.81702	1.77504	Below LOD	24.1571	58.5016	0.418364	0.177059
DM18-1_9	Z_DM18-1	-5.85371	0.01148	102.112	0.604268	-242.825	88.4891	1.96581	0.095415	0.182601	0.00101726	0.216941	0.341912	12.8068	0.743798	0.508764	0.0247265	0.304673	2675.3	8.50363	9.21203	2651.3	5.24764	105.618	2665.26	5.01406	54.6053	99.1027		2021-09-10 10:20:40.361	2021-09-10 10:20:40.361	25.044	365.929	61.5415	102.906	Below LOD	965.067	2061.32	273.43	10.2961	2.44452	24.0692	2.16202	1.60385	Below LOD	26.0048	57.2234	0.21513	0.129324
DM18-1_10	Z_DM18-1	0.712135	0.016931	142.684	0.864509	1996.15	93.184	2.02755	0.098986	0.182521	0.000811671	0.243335	0.267302	12.4111	0.719593	0.493244	0.0241468	0.458026	2674.87	6.45559	7.36668	2584.67	4.13566	104.194	2635.88	3.77332	54.3242	96.6277		2021-09-10 12:03:26.315	2021-09-10 12:03:26.315	21.524	307.178	53.5182	100.265	Below LOD	777.796	1970.16	263.15	13.5232	2.45142	19.8906	1.82984	1.69409	Below LOD	21.3215	52.3721	0.230433	0.119295
Grn_1	Z_Maniitsoq	-29.4179	0.0391487	202.834	-6.48236	-45.4625	361.46	1.77861	0.0849461	0.224519	0.000718332	0.354936	0.0777249	17.5519	1.01403	0.562254	0.0268156	0.466293	3012.54	3.81094	5.13111	2875.93	2.66466	110.677	2965.43	2.44836	55.4902	95.465		2021-09-09 20:30:33.675	2021-09-09 20:30:33.675	25.017	462.924	70.2852	99.1406	Below LOD	711.446	1366.15	376.165	28.3121	1.58356	10.1872	1.23176	1.14814	Below LOD	18.0499	33.1439	0.374356	0.129748
Grn_2	Z_Maniitsoq	-1.97712	0.0369809	200.34	0.942025	-676.832	61.5613	1.68871	0.0817634	0.22411	0.000847437	0.349236	0.0715751	18.2957	1.05981	0.592185	0.0287331	0.524731	3009.52	5.00748	6.07674	2998.26	2.64721	116.287	3005.28	3.41622	55.7125	99.6257		2021-09-09 22:15:16.194	2021-09-09 22:15:16.194	25.01	397.424	52.4855	89.1841	Below LOD	643.063	1472.1	366.307	30.692	1.6703	10.9184	1.36508	1.27708	Below LOD	19.7705	39.1371	0.452681	0.160752
Grn_3	Z_Maniitsoq	-1.7851	0.0336363	202.412	1.6218	-749.834	50.904	1.72682	0.0841227	0.223914	0.000790784	0.358699	0.0753962	17.8497	1.03432	0.579124	0.0282232	0.528916	3008.16	4.51243	5.67602	2945.16	3.16475	115.205	2981.56	3.14805	55.6847	97.9056		2021-09-10 00:01:05.556	2021-09-10 00:01:05.556	25.023	395.046	48.4431	92.6119	Below LOD	778.056	1566.44	362.505	29.0233	1.93715	11.9678	1.73514	1.44339	Below LOD	24.5605	44.1782	0.329861	0.132157
Grn_4	Z_Maniitsoq	0.828162	0.0322246	183.242	0.778168	1615.31	605.005	1.74604	0.0855884	0.224233	0.000802094	0.337265	0.0859444	17.7067	1.02711	0.572752	0.0280286	0.560501	3010.44	4.60325	5.74825	2919.09	3.32358	114.917	2973.8	3.46077	55.5734	96.9657		2021-09-10 01:42:27.171	2021-09-10 01:42:27.171	25.003	315.462	50.3401	74.3019	Below LOD	557.439	1380.61	323.932	35.671	1.62399	10.0136	1.51941	1.23068	Below LOD	21.6531	38.8784	0.286821	0.135728
Grn_5	Z_Maniitsoq	-0.0252648	0.0269901	157.558	0.931568	-52948.6	99.2697	1.87459	0.090008	0.224344	0.000761232	0.297928	0.129837	16.5034	0.950582	0.533475	0.0255577	0.461374	3011.26	4.22762	5.45133	2756.06	3.24563	107.479	2906.34	2.84275	55.2572	91.5251		2021-09-10 03:27:37.701	2021-09-10 03:27:37.701	25.034	257.804	57.3116	72.4364	Below LOD	613.538	1385.64	312.881	32.8125	1.66459	10.8682	1.46684	1.09727	Below LOD	16.2197	37.4303	0.327734	0.122679
Grn_6	Z_Maniitsoq	-0.632852	0.0354389	204.212	0.883032	-2113.24	97.2691	1.68687	0.0834238	0.224639	0.000718664	0.346738	0.0870458	18.3833	1.06714	0.592829	0.0293819	0.510873	3013.4	3.8062	5.12496	3000.87	2.56084	118.864	3009.93	2.63351	55.8818	99.5841		2021-09-10 05:10:50.098	2021-09-10 05:10:50.098	25.052	412.173	45.1231	74.7405	Below LOD	639.407	1483.6	364.6	29.0602	1.73779	10.2138	1.40349	1.22408	Below LOD	18.5721	41.7529	0.350694	0.132912
Grn_7	Z_Maniitsoq	4.08616	0.033753	194.322	0.87944	327.639	126.147	1.72568	0.0843373	0.223769	0.000757374	0.354143	0.0885297	17.8518	1.03488	0.579499	0.0283142	0.477586	3007.14	4.20425	5.43053	2946.69	2.70776	115.563	2981.7	2.71073	55.7499	97.99		2021-09-10 06:51:14.437	2021-09-10 06:51:14.437	25.008	410.774	52.1384	74.5253	Below LOD	578.937	1470.79	352.15	22.9693	1.7723	10.0233	1.43083	1.25937	Below LOD	21.3673	36.6848	0.416495	0.171769
Grn_8	Z_Maniitsoq	2.49283	0.0315266	172.44	0.733669	536.59	64.1065	1.72265	0.0850549	0.224409	0.000803696	0.32642	0.0938452	17.9653	1.04487	0.580515	0.0287043	0.519889	3011.69	4.6137	5.75765	2950.84	2.49443	117.044	2987.76	3.16942	55.9222	97.9794		2021-09-10 08:38:02.398	2021-09-10 08:38:02.398	25.332	303.199	47.9473	71.9073	Below LOD	693.958	1409.72	333.082	29.5756	1.73331	10.1907	1.46947	1.18335	Below LOD	19.4035	38.9479	0.341922	0.142863
Grn_9	Z_Maniitsoq	-0.36012	0.029399	183.92	0.829968	-3714.23	103.049	1.71883	0.0990461	0.224644	0.000862844	0.308001	0.47446	18.0461	1.04729	0.582211	0.0284633	0.97898	3013.34	5.1117	6.15894	2957.49	12.4544	119.186	2991.95	4.62901	56.9235	98.1464		2021-09-10 10:22:40.855	2021-09-10 10:22:40.855	25.014	256.316	44.2878	85.7966	Below LOD	749.052	1709.07	333.377	25.5254	2.09496	11.9091	1.51929	1.35772	Below LOD	22.4627	50.0328	0.336583	0.15744
Grn_10	Z_Maniitsoq	-2.2192	0.0274584	144.652	0.83959	-603.046	92.5269	1.76154	0.0848776	0.224059	0.00130171	0.29534	0.201369	17.5675	1.01974	0.567705	0.0272529	0.488435	3009.13	8.67601	9.33374	2898.37	4.56076	112.137	2966.2	5.84581	55.8187	96.3193		2021-09-10 12:05:27.033	2021-09-10 12:05:27.033	9.738	266.292	72.7787	74.0254	Below LOD	582.817	1510.67	353.957	85.0855	1.88602	10.6918	2.68846	1.33264	Below LOD	34.4548	41.8837	0.549312	0.346544
OGC_1	Z_OG1	1.34802	0.0277058	137.463	0.734843	904.665	62.8802	1.41853	0.0697222	0.299058	0.000878533	0.253816	0.271993	29.0603	1.69443	0.705005	0.0346479	0.724381	3464.57	3.11361	4.55261	3439.56	4.59934	131	3455.47	2.8076	57.2742	99.2782		2021-09-09 20:22:23.313	2021-09-09 20:22:23.313	25.003	197.091	59.597	113.062	Below LOD	662.705	1462.47	260.472	9.4823	1.61324	7.27216	1.12028	1.25798	Below LOD	18.8746	35.2025	0.220668	0.114252
OGC_2	Z_OG1	-0.756942	0.0361212	175.208	0.792571	-1610.31	86.4644	1.41864	0.069157	0.299485	0.000858556	0.0939452	0.535889	29.0572	1.6755	0.704923	0.0343936	0.591577	3466.79	2.95251	4.44421	3439.27	2.95072	130.02	3455.4	2.16181	56.5382	99.2063		2021-09-09 20:23:37.609	2021-09-09 20:23:37.609	25.061	Below LOD	46.0945	125.45	Below LOD	809.012	1554.39	241.461	8.88011	1.83231	1.61157	0.699391	1.38099	49.9476	22.024	40.3181	0.261847	0.139639
OGC_3	Z_OG1	4.58787	0.0536487	250.978	0.710671	265.915	186.285	1.4186	0.0622013	0.298709	0.00084135	0.333916	0.567104	29.0599	1.60929	0.704994	0.0311876	0.760913	3462.77	2.83306	4.36372	3439.5	5.57435	117.697	3455.46	2.76062	54.3458	99.328		2021-09-09 20:24:51.925	2021-09-09 20:24:51.925	25.061	296.317	51.7406	119.896	Below LOD	644.476	1478.99	273.746	9.09081	1.71858	10.9188	1.02941	1.37791	65.4827	18.9772	37.1814	0.565186	0.177514
OGC_4	Z_OG1	-3.62448	0.0361274	177.181	0.793974	-336.517	104.207	1.41853	0.0696414	0.298915	0.000854606	0.277355	0.0999558	29.0598	1.68431	0.704994	0.0346792	0.614145	3463.84	2.93567	4.43496	3439.53	4.06506	131.062	3455.48	2.36334	56.9998	99.2981		2021-09-09 20:45:39.556	2021-09-09 20:45:39.556	25.011	193.222	57.9047	112.055	Below LOD	721.464	1547.03	257.828	9.01146	1.81371	10.3038	0.96352	1.30695	48.6296	20.6011	39.7455	0.499841	0.172172
OGC_5	Z_OG1	1.44846	0.0283343	135.638	0.801246	841.715	160.556	1.41853	0.0692914	0.299446	0.000925817	0.283803	0.190035	29.0601	1.68396	0.705002	0.034272	0.793901	3466.56	3.45588	4.79398	3439.55	4.39197	129.704	3455.46	2.85543	56.9451	99.2209		2021-09-09 20:59:30.309	2021-09-09 20:59:30.309	25.042	164.594	41.737	105.206	Below LOD	675.769	1470.5	261.008	10.0183	1.76587	9.44507	0.926186	1.22811	Below LOD	18.0062	40.7612	0.303395	0.15126
OGC_6	Z_OG1	-1.67687	0.0309725	147.97	0.799856	-727.412	89.2625	1.41854	0.0689854	0.29886	0.000892207	0.158651	0.223039	29.0599	1.68515	0.704997	0.0344622	0.597162	3463.54	3.21261	4.61324	3439.53	4.56713	130.156	3455.47	2.53213	56.8296	99.3068		2021-09-09 21:14:41.118	2021-09-09 21:14:41.118	25.059	139.136	52.9234	137.267	Below LOD	577.239	2118.52	247.01	10.8828	2.46374	7.55888	1.19284	1.64084	Below LOD	20.8625	56.2094	0.266265	0.135768
OGC_7	Z_OG1	1.25459	0.0271237	125.422	0.800027	971.936	81.7356	1.41858	0.0688073	0.299145	0.000866002	0.154204	0.253366	29.0603	1.68449	0.705005	0.0343115	0.753866	3465.03	3.0237	4.49589	3439.54	5.59838	129.633	3455.47	2.71238	56.8277	99.2644		2021-09-09 21:28:06.678	2021-09-09 21:28:06.678	25.029	137.479	44.7405	109.719	Below LOD	539.139	1674.31	243.457	10.1079	1.97283	6.65265	0.99356	1.47519	Below LOD	21.2419	47.1214	0.30812	0.149896
OGC_8	Z_OG1	-11.1433	0.0308878	146.61	0.800132	-109.45	725.959	1.4187	0.0687786	0.299011	0.000993792	0.212721	0.649985	29.0598	1.685	0.704995	0.0343349	0.617392	3464.28	3.92085	5.12823	3439.47	7.34626	129.69	3455.35	4.05189	56.871	99.2837		2021-09-09 21:42:59.487	2021-09-09 21:42:59.487	25.027	142.498	49.1049	93.2346	Below LOD	798.504	1482.68	234.203	9.69618	1.72856	6.3321	1.17132	1.1895	Below LOD	19.471	41.8277	0.628466	0.224412
OGC_9	Z_OG1	3.049	0.0342159	167.094	0.800048	399.901	147.322	1.41863	0.0682465	0.299102	0.000821905	0.294043	0.146943	29.0602	1.6794	0.705004	0.0341694	0.821992	3464.82	2.6634	4.25285	3439.52	6.50584	128.987	3455.44	3.1356	56.6282	99.2697		2021-09-09 21:57:00.174	2021-09-09 21:57:00.174	25.119	149.662	49.6296	104.439	Below LOD	613.769	1712.51	242.49	10.2837	1.92608	9.36899	1.2398	1.43772	Below LOD	21.5336	47.917	0.638601	0.205788
OGC_10	Z_OG1	-53.4884	0.0290223	134.828	0.79997	-22.802	1486.02	1.41863	0.0683065	0.298954	0.00085473	0.263364	0.275771	29.06	1.68215	0.704999	0.0341855	0.749066	3464.04	2.94131	4.43893	3439.5	6.45527	129.058	3455.47	2.56564	56.7533	99.2916		2021-09-09 22:11:57.194	2021-09-09 22:11:57.194	25.02	178.873	52.8344	84.0007	Below LOD	768.851	1387.25	233.031	9.0001	1.56127	6.96635	1.00321	1.19742	Below LOD	22.0441	36.8174	0.389698	0.133649
OGC_11	Z_OG1	1.93493	0.0346644	173.075	0.799985	629.984	246.77	1.41806	0.0698982	0.299444	0.000924531	0.289415	0.122565	29.0602	1.6724	0.705004	0.0339422	0.77284	3466.55	3.43823	4.77478	3440.68	7.52968	133.761	3455.43	3.2253	56.2293	99.2536		2021-09-09 22:30:27.829	2021-09-09 22:30:27.829	25.004	248.965	43.9804	103.197	Below LOD	585.524	1679.42	245.086	10.8395	1.93095	7.98467	1.34078	1.38317	Below LOD	19.1795	44.9698	0.53523	0.170082
OGC_12	Z_OG1	1.62564	0.0264045	152.676	0.79988	750.449	75.2895	1.4188	0.0689067	0.298727	0.000880484	0.270188	0.675149	29.0601	1.6973	0.705002	0.0346755	0.859058	3462.86	3.14101	4.57359	3439.45	8.92593	130.753	3455.38	3.87149	57.1407	99.3239		2021-09-09 22:45:30.767	2021-09-09 22:45:30.767	25.039	270.219	65.2503	100.649	17223.3	5864.17	1783.36	224.054	11.9494	2.01622	14.6017	2.44882	1.43842	1999.7	449.032	48.137	7.73395	2.82398
OGC_13	Z_OG1	-0.749846	0.045216	240.58	0.799928	-1626.14	129.866	1.4187	0.0690867	0.299166	0.000873776	0.371731	0.168095	29.06	1.69516	0.704999	0.0346899	0.840199	3465.13	3.0766	4.52469	3439.47	7.47301	130.87	3455.4	3.55533	57.1219	99.2595		2021-09-09 23:00:32.548	2021-09-09 23:00:32.548	25.022	268.724	45.791	102.525	Below LOD	775.628	1781.78	263.133	12.2499	2.04238	25.59	3.49102	1.49949	51.7609	24.2831	48.8273	1.22258	0.392037
OGC_14	Z_OG1	4.70208	0.0272629	143.343	0.800025	259.307	124.006	1.41854	0.0683669	0.299218	0.000895472	0.195795	0.621003	29.0602	1.67961	0.705004	0.0340798	0.735694	3465.39	3.23798	4.6373	3439.56	4.76504	128.769	3455.45	2.95941	56.6224	99.2544		2021-09-09 23:14:59.081	2021-09-09 23:14:59.081	25.006	194.917	64.4483	94.3881	Below LOD	698.997	1593.6	256.659	13.4195	1.87963	8.4567	1.13129	1.40294	128.702	28.6555	44.6659	0.40002	0.186293
OGC_15	Z_OG1	-10.9669	0.0314818	177.887	0.800106	-111.212	243.37	1.41856	0.0711916	0.298953	0.000876216	0.204319	0.162764	29.06	1.70522	0.704999	0.0353493	0.729552	3464.03	3.10194	4.54545	3439.53	4.9473	133.674	3455.45	2.84816	57.7711	99.2929		2021-09-09 23:28:49.792	2021-09-09 23:28:49.792	25.039	296.266	58.2655	111.334	Below LOD	907.875	1978.63	275.345	11.6915	2.27027	11.2462	1.23955	1.6412	Below LOD	23.2186	50.6604	0.516618	0.189018
OGC_16	Z_OG1	-0.11963	0.0517951	281.683	0.79997	-10194.2	102.139	1.41855	0.0690067	0.299033	0.000837028	0.337431	0.0747224	29.06	1.68285	0.705	0.0342969	0.720328	3464.46	2.79085	4.33653	3439.54	4.90507	129.669	3455.47	2.55275	56.814	99.2807		2021-09-09 23:43:22.704	2021-09-09 23:43:22.704	25.04	367.196	53.1434	96.4703	Below LOD	728.79	1732.82	270.052	12.5389	1.98907	10.7391	1.36894	1.38052	92.6326	28.3048	44.3938	0.558555	0.210574
OGC_17	Z_OG1	1620.4	0.020833	114.311	0.799963	0.752411	18717.4	1.41858	0.0681431	0.299285	0.00102002	0.16016	0.554912	29.06	1.68196	0.705001	0.0341911	0.660567	3465.69	4.10896	5.28318	3439.53	5.45115	129.011	3455.41	3.46863	56.7427	99.2452		2021-09-09 23:56:45.802	2021-09-09 23:56:45.802	25.01	209.374	48.7853	104.547	Below LOD	667.012	1826.58	248.681	8.15684	2.1484	8.99394	1.01346	1.54143	Below LOD	22.5573	45.2155	0.151974	0.100959
OGC_18	Z_OG1	-0.538802	0.0334985	196.276	0.800261	-2263.77	84.3098	1.41857	0.0691604	0.298902	0.000939758	0.297513	0.287261	29.06	1.68407	0.705	0.0343318	0.882513	3463.74	3.56326	4.86838	3439.53	5.34084	129.831	3455.43	3.20606	56.8936	99.301		2021-09-10 00:15:32.523	2021-09-10 00:15:32.523	25.024	258.669	48.5982	137.409	Below LOD	878.799	2337.81	244.571	9.06274	2.91152	9.57872	1.79183	2.07035	Below LOD	24.4306	64.0149	0.671662	0.235851
OGC_19	Z_OG1	18.802	0.0238101	126.486	0.799834	64.8466	311.606	1.41852	0.0685555	0.299254	0.00101051	0.274854	0.161676	29.06	1.68012	0.705001	0.034124	0.509592	3465.53	4.0436	5.23115	3439.55	4.25449	128.976	3455.45	2.96712	56.6913	99.2504		2021-09-10 00:29:30.721	2021-09-10 00:29:30.721	25.124	189.878	43.0767	100.342	Below LOD	733.353	1733.7	241.701	13.6251	2.06253	8.89545	1.21138	1.49389	Below LOD	20.0937	46.1355	0.333171	0.150523
OGC_20	Z_OG1	-2.52041	0.026564	153.239	0.799985	-483.852	85.0552	1.41876	0.0679328	0.29906	0.000959844	0.181815	0.926258	29.0598	1.67732	0.704996	0.0340543	0.78894	3464.55	3.69655	4.96436	3439.44	8.16283	128.515	3455.37	3.81031	56.2881	99.2754		2021-09-10 00:44:41.106	2021-09-10 00:44:41.106	25.146	216.819	61.1194	95.6031	Below LOD	800.818	1690.94	260.116	12.3636	1.99741	9.48489	1.11909	1.49098	101.467	25.8926	44.5576	0.296646	0.148571
OGC_21	Z_OG1	-129.506	0.0202133	135.517	0.799886	-9.41779	1906.22	1.42024	0.0729453	0.298951	0.000974311	0.255678	0.327983	29.0601	1.69676	0.705003	0.0346787	0.946052	3463.98	3.81274	5.05938	3438.91	19.3846	132.229	3456.09	7.23932	55.8883	99.2763		2021-09-10 00:58:18.549	2021-09-10 00:58:18.549	25.217	183.392	55.8777	124.587	Below LOD	1158.29	2172.64	230.385	12.1851	2.58748	18.6719	3.1549	1.68484	133.118	35.9963	56.171	2.09855	0.755833
OGC_22	Z_OG1	-2.201	0.0621981	336.989	0.799951	-554.044	118.927	1.41856	0.0691524	0.299095	0.000909876	0.377698	0.325056	29.0599	1.67958	0.704997	0.0339792	0.864779	3464.78	3.35035	4.71751	3439.53	5.73073	128.762	3455.48	2.81104	56.8409	99.2712		2021-09-10 01:11:40.483	2021-09-10 01:11:40.483	19.204	402.411	68.4341	95.8519	Below LOD	960.794	1688.02	281.743	11.6497	2.03903	12.9787	1.89094	1.40176	84.4083	25.8789	47.6198	0.866921	0.30742
OGC_23	Z_OG1	-2.14022	0.0231206	132.559	0.799973	-569.756	126.961	1.42308	0.0766218	0.299134	0.000937071	0.260639	0.153056	29.06	1.71611	0.705	0.0352115	0.981475	3464.94	3.54563	4.85982	3437.88	30.7224	135.139	3453.92	12.0044	60.0627	99.2189		2021-09-10 01:24:15.405	2021-09-10 01:24:15.405	25.003	172.808	48.5659	101.338	Below LOD	842.205	1775.65	228.247	11.4247	2.143	11.9858	2.48418	1.54906	Below LOD	21.8611	50.4826	0.615629	0.220817
OGC_24	Z_OG1	-2.20965	0.0367164	212.175	0.80008	-551.826	99.9601	1.41851	0.068689	0.299059	0.000809524	0.309765	0.138765	29.06	1.68179	0.705001	0.0342136	0.616937	3464.61	2.56453	4.19543	3439.56	3.98968	129.297	3455.48	2.36731	56.8627	99.277		2021-09-10 01:39:07.770	2021-09-10 01:39:07.770	25.004	257.882	57.4429	90.3095	Below LOD	828.043	1678.25	256.042	11.8659	1.97043	10.7323	1.32733	1.34876	Below LOD	30.6906	46.3782	0.506268	0.233422
OGC_26	Z_OG1	3.17095	0.023383	129.779	0.80013	384.602	51.1332	1.41853	0.0686657	0.299023	0.000900183	0.180329	0.439285	29.0601	1.68001	0.705001	0.0342118	0.644696	3464.38	3.28339	4.67358	3439.55	4.4963	129.281	3455.46	2.71398	56.7835	99.2832		2021-09-10 02:12:18.194	2021-09-10 02:12:18.194	25.012	253.006	46.4077	84.4428	Below LOD	716.199	1528.33	253.307	12.1731	1.89386	9.427	1.27923	1.31945	67.3847	29.5142	45.5365	0.222685	0.11294
OGC_27	Z_OG1	-1.65985	0.0408132	220.921	0.800022	-734.676	63.143	1.41878	0.07006	0.299088	0.000787391	0.304017	0.30562	29.0598	1.69874	0.704996	0.0347203	0.920543	3464.76	2.37259	4.08255	3439.44	8.43953	131.342	3455.38	3.74964	57.4563	99.2691		2021-09-10 02:25:57.464	2021-09-10 02:25:57.464	25.014	1266.94	69.3393	93.8959	Below LOD	837.349	1739.24	246.14	5.98001	2.13579	10.2504	1.05756	1.46838	96.35	25.3806	51.4475	0.504649	0.193609
OGC_28	Z_OG1	0.129976	0.0192513	117.641	0.799856	9380.9	67.8345	1.4185	0.0686152	0.299225	0.001043	0.244145	0.51526	29.0602	1.67794	0.705003	0.0341609	0.376954	3465.37	4.25494	5.39412	3439.57	3.84387	129.11	3455.47	2.7486	56.6612	99.2555		2021-09-10 02:40:41.568	2021-09-10 02:40:41.568	25.053	211.612	51.7922	95.1876	Below LOD	830.089	1866.28	247.829	12.9322	2.24461	8.52173	1.34707	1.51838	68.7728	30.4421	52.5564	0.394223	0.176598
OGC_29	Z_OG1	8.04966	0.0273852	153.625	0.800032	151.532	117.473	1.41858	0.0692291	0.298854	0.000894016	0.263451	0.191581	29.0599	1.68522	0.704999	0.0344444	0.718291	3463.51	3.23792	4.63925	3439.52	5.4717	130.198	3455.45	2.94421	56.9571	99.3075		2021-09-10 02:54:26.813	2021-09-10 02:54:26.813	25.014	178.156	42.3631	105.649	Below LOD	976.407	2023.9	252.948	10.0718	2.38451	7.43317	1.13257	1.80022	60.8568	24.1804	59.827	0.487613	0.222493
OGC_30	Z_OG1	-2.15391	0.0261269	144.678	0.799966	-566.034	52.7443	1.41928	0.0662682	0.299286	0.000899482	0.215096	0.254257	29.0594	1.65857	0.704984	0.0337123	0.925175	3465.75	3.26377	4.65354	3439.2	13.2924	126.822	3455.19	5.41508	55.5991	99.2341		2021-09-10 03:09:17.444	2021-09-10 03:09:17.444	25.008	297.097	40.3248	85.3806	Below LOD	685.374	1560	283.397	13.9392	1.94179	10.3457	1.18586	1.34529	Below LOD	19.7596	45.4448	0.436844	0.17433
OGC_31	Z_OG1	31.0679	0.0202231	143.294	0.799991	39.2579	291.835	1.41918	0.068078	0.298956	0.00103067	0.227857	0.587514	29.0602	1.68276	0.705004	0.0342299	0.879357	3463.98	4.19562	5.35478	3439.31	12.6578	129.079	3455.2	5.51918	56.7021	99.2878		2021-09-10 03:23:18.116	2021-09-10 03:23:18.116	25.01	Below LOD	63.8058	124.289	Below LOD	925.265	2229.99	214.324	12.5979	2.84471	5.58339	1.33628	1.94961	Below LOD	37.2621	69.0235	Below LOD	0.124427
OGC_32	Z_OG1	3.15338	0.033669	184.745	0.800045	386.739	75.2161	1.41857	0.068105	0.299034	0.000876459	0.229701	0.174134	29.0597	1.67315	0.704992	0.0340263	0.73896	3464.45	3.0998	4.54213	3439.51	4.96485	128.505	3455.44	2.8784	56.4824	99.2801		2021-09-10 03:43:19.075	2021-09-10 03:43:19.075	25.078	465.497	62.4772	81.5298	Below LOD	795.988	1508.37	236.906	7.70121	1.85545	5.03011	1.05054	1.23355	81.1469	23.8259	43.8404	0.519688	0.210431
OGC_34	Z_OG1	-0.912535	0.0254761	141.273	0.799775	-1336.31	89.7195	1.41854	0.0690357	0.299118	0.000948565	0.253435	0.143457	29.0601	1.68555	0.705002	0.0344374	0.671712	3464.85	3.6301	4.92335	3439.55	4.79928	130.102	3455.44	3.07283	56.8995	99.2696		2021-09-10 04:12:06.999	2021-09-10 04:12:06.999	25.068	126.713	42.9013	83.947	Below LOD	701.542	1590.62	248.192	10.8079	1.93211	6.60075	1.11474	1.34698	Below LOD	26.3299	45.1892	0.287302	0.130902
OGC_35	Z_OG1	2.22944	0.0252707	141.969	0.799946	546.937	55.619	1.41864	0.0685496	0.299166	0.000976215	0.140603	0.258899	29.0599	1.68043	0.704997	0.034091	0.902885	3465.09	3.81437	5.0567	3439.49	6.49405	128.868	3455.4	3.58724	56.8323	99.2612		2021-09-10 04:25:50.764	2021-09-10 04:25:50.764	25.012	132.031	40.0698	94.4297	Below LOD	851.198	1815.22	241.298	10.1177	2.2105	6.29761	1.16683	1.55276	Below LOD	23.25	52.6082	0.397575	0.155574
OGC_36	Z_OG1	0.662669	0.0247598	132.865	0.800135	1841.06	117.302	1.41799	0.0718531	0.298697	0.000978356	0.208651	0.260397	29.0601	1.68459	0.705002	0.0343123	0.797323	3463.27	3.67163	4.85413	3439.49	7.3605	129.324	3455.39	3.66081	56.5196	99.3135		2021-09-10 04:40:11.447	2021-09-10 04:40:11.447	25.063	342.442	43.9578	83.3527	Below LOD	803.159	1633.47	267.764	11.8044	1.90899	8.15487	1.10097	1.36724	Below LOD	23.807	43.4667	0.326347	0.126557
OGC_37	Z_OG1	0.752152	0.0236688	124.733	0.799945	1620.37	93.0243	1.41854	0.0685435	0.299602	0.000974548	0.158897	0.322352	29.0599	1.6816	0.704998	0.0341151	0.658526	3467.35	3.79164	5.03888	3439.54	4.48631	128.944	3455.43	3.14144	56.7783	99.198		2021-09-10 04:53:33.522	2021-09-10 04:53:33.522	25.216	208.144	50.2386	86.0613	Below LOD	670.987	1663.85	251.202	11.3769	2.04485	7.33482	0.922892	1.48534	Below LOD	22.5374	47.0663	0.330085	0.148928
OGC_38	Z_OG1	-35.3674	0.0297353	152.771	0.800101	-34.4934	633.731	1.41853	0.0683467	0.298743	0.000924513	0.260593	0.287904	29.06	1.68005	0.705001	0.0340847	0.624067	3462.92	3.46037	4.79546	3439.55	4.46088	128.777	3455.46	2.7986	56.6083	99.3251		2021-09-10 05:07:31.134	2021-09-10 05:07:31.134	25.124	165.998	45.488	74.7161	Below LOD	694.121	1519.18	250.669	9.3308	1.80199	7.39003	1.1538	1.20368	116.118	25.364	41.7075	0.426258	0.17011
OGC_39	Z_OG1	2.73923	0.0245866	137.194	0.799969	445.149	49.8324	1.41961	0.0704966	0.299164	0.000981741	0.259631	0.242735	29.0599	1.69292	0.704998	0.0345946	0.970267	3465.08	3.84912	5.08169	3439.13	15.7295	131.016	3455.06	6.49672	57.363	99.251		2021-09-10 05:24:40.318	2021-09-10 05:24:40.318	25.021	151.375	44.8528	88.1088	Below LOD	668.442	1770.34	254.146	15.4072	2.12765	10.1696	1.03449	1.47297	Below LOD	23.9158	49.0555	0.574887	0.214316
OGC_41	Z_OG1	-2.34282	0.0647172	337.991	0.800246	-520.456	64.8354	1.41851	0.0687582	0.299173	0.000811933	0.314847	0.927271	29.0601	1.68179	0.705002	0.0342283	0.719524	3465.19	2.57668	4.19957	3439.56	4.00396	129.368	3455.49	2.32735	56.7114	99.2602		2021-09-10 05:52:50.405	2021-09-10 05:52:50.405	25.044	432.617	48.7216	85.7533	Below LOD	722.368	1672.19	351.322	16.1963	2.04597	15.3404	1.80335	1.31818	54.8575	26.5419	47.4848	0.683047	0.194679
OGC_42	Z_OG1	1.66784	0.0354967	199.374	0.799581	731.307	152.865	1.41852	0.069028	0.298908	0.000820107	0.171068	1.65904	29.0599	1.67858	0.704998	0.0340825	0.913181	3463.82	2.65673	4.2524	3439.55	4.01571	129.026	3455.47	2.52119	56.767	99.2993		2021-09-10 06:05:00.507	2021-09-10 06:05:00.507	25.025	178.946	33.3437	79.6035	Below LOD	656.186	1600.2	249.19	9.28821	1.90003	5.91665	0.858856	1.30543	48.4711	20.8037	40.0546	0.310527	0.136157
OGC_43	Z_OG1	6.48178	0.02749	153.026	0.800625	188.097	263.909	1.41856	0.0687143	0.299278	0.00094042	0.151528	1.80822	29.06	1.68324	0.705001	0.0342663	0.722156	3465.69	3.5621	4.86928	3439.54	5.12143	129.462	3455.46	2.76031	56.9818	99.2454		2021-09-10 06:18:56.244	2021-09-10 06:18:56.244	25.039	97.0229	37.6708	90.5385	Below LOD	738.665	1756.03	256.296	11.752	2.12054	4.84042	0.961508	1.43984	Below LOD	24.6299	43.7438	Below LOD	0.100572
OGC_44	Z_OG1	11.4747	0.0240473	132.576	0.799905	106.317	192.558	1.41807	0.072226	0.298743	0.00103869	0.0940667	1.20856	29.0599	1.69194	0.704997	0.0345961	0.766127	3462.87	4.24531	5.39001	3440.73	8.14018	136.745	3456.01	4.15381	59.7887	99.3607		2021-09-10 06:33:23.428	2021-09-10 06:33:23.428	25.004	Below LOD	34.6986	91.9774	Below LOD	671.284	1816.82	228.505	10.0111	2.1786	2.57149	1.01495	1.48112	Below LOD	22.4142	46.0839	0.367641	0.160893
OGC_45	Z_OG1	0.0576929	0.0288668	156.235	0.799941	21129.1	97.1446	1.41851	0.0687043	0.299305	0.000953401	0.21466	0.499246	29.0601	1.67996	0.705001	0.0341783	0.456025	3465.83	3.63762	4.91498	3439.56	4.06341	129.197	3455.47	2.6965	56.714	99.242		2021-09-10 06:46:55.055	2021-09-10 06:46:55.055	23.286	224.378	34.809	92.3532	Below LOD	814.84	1894.02	262.397	11.5459	2.2369	11.2364	1.35058	1.51182	54.9189	20.9843	46.4667	0.486276	0.178473
OGC_46	Z_OG1	1.54309	0.0434699	252.235	0.799959	790.291	76.2672	1.41848	0.0687775	0.298956	0.000908692	0.326817	0.168325	29.06	1.68216	0.704999	0.0342039	0.628701	3464.03	3.33984	4.70802	3439.56	3.03275	129.304	3455.47	2.6169	56.7516	99.2935		2021-09-10 07:07:07.387	2021-09-10 07:07:07.387	25.052	375.887	44.5545	117.621	Below LOD	856.717	2255.23	261.465	10.9857	2.73097	9.67009	0.978681	1.7967	Below LOD	21.8956	63.456	0.459797	0.195971
OGC_47	Z_OG1	6.35968	0.0419523	248.918	0.79988	191.716	162.85	1.41976	0.0674033	0.299124	0.000883084	0.339872	0.176393	29.0601	1.69398	0.705003	0.0346027	0.95601	3464.91	3.13942	4.5626	3439.07	17.0338	129.894	3455.03	6.73802	56.3058	99.254		2021-09-10 07:21:52.010	2021-09-10 07:21:52.010	25.047	306.183	47.9524	98.3786	Below LOD	711.008	1976.97	257.331	9.74947	2.30586	13.1991	1.40186	1.558	76.1194	24.7908	51.836	1.14048	0.339201
OGC_48	Z_OG1	-3.94793	0.03077	173.374	0.800075	-308.907	105.19	1.41853	0.0690313	0.299033	0.000948033	0.154408	0.606894	29.06	1.68526	0.704999	0.0343531	0.628984	3464.42	3.63426	4.93008	3439.54	4.38168	129.847	3455.45	2.95179	57.0522	99.282		2021-09-10 07:37:29.104	2021-09-10 07:37:29.104	25.054	193.312	37.9152	98.0734	Below LOD	739.585	1838.46	243.654	11.4034	2.3921	6.58448	1.16994	1.60868	Below LOD	22.595	50.5327	0.327158	0.132056
OGC_51	Z_OG1	-2.60644	0.0217144	124.525	0.799409	-467.906	83.7028	1.41858	0.0688475	0.299142	0.00095206	0.137817	2.67153	29.06	1.68309	0.705001	0.0342644	0.5698	3464.98	3.65048	4.93539	3439.53	5.43718	129.507	3455.45	2.95538	56.8378	99.2656		2021-09-10 08:20:03.180	2021-09-10 08:20:03.180	25.011	Below LOD	44.9709	99.2333	Below LOD	731.765	1879.8	223.82	9.03869	2.41862	2.92506	0.911257	1.53278	Below LOD	24.372	49.6596	0.489439	0.177276
OGC_52	Z_OG1	0.550863	0.0286161	169.151	0.800228	2213.97	92.6915	1.41875	0.0691473	0.298994	0.000914183	0.291571	0.156161	29.0601	1.69796	0.705002	0.034717	0.800733	3464.23	3.37994	4.73706	3439.47	8.30921	130.972	3455.41	3.54579	57.1919	99.2852		2021-09-10 08:34:43.635	2021-09-10 08:34:43.635	25.016	264.601	49.1052	89.3315	Below LOD	975.255	1803.19	250.737	9.63028	2.17421	8.63267	1.16633	1.46609	60.5358	27.2693	46.8528	0.411999	0.182324
OGC_53	Z_OG1	-2.25286	0.027711	171.453	0.799928	-541.306	47.8457	1.41861	0.0689514	0.299193	0.000952882	0.247477	0.518993	29.06	1.67422	0.704999	0.03398	0.706198	3465.24	3.65823	4.94324	3439.51	6.05402	128.694	3455.41	3.4283	56.6403	99.2575		2021-09-10 08:52:32.254	2021-09-10 08:52:32.254	25.014	239.732	46.2787	103.012	Below LOD	929.219	1948.87	261.374	12.9233	2.50883	11.2397	1.64087	1.64754	83.6136	31.2082	54.7636	0.55045	0.205013
OGC_54	Z_OG1	-0.987748	0.0327828	201.44	0.800028	-1234.95	70.0779	1.42043	0.071341	0.298827	0.000958298	0.315883	0.534597	29.06	1.70109	0.705	0.0348509	0.964583	3463.37	3.69989	4.97186	3438.82	24.0915	132.184	3454.89	8.86034	57.8192	99.291		2021-09-10 09:07:24.674	2021-09-10 09:07:24.674	18.13	262.107	50.5535	96.0779	Below LOD	881.025	1905.88	258.522	19.281	2.36371	31.6661	6.91781	1.61586	73.8155	32.722	53.8632	2.57076	1.02672
OGC_55	Z_OG1	8.02569	0.0190721	122.883	0.79993	151.896	324.458	1.41857	0.0688434	0.299382	0.00109753	0.24516	0.285387	29.06	1.68226	0.705	0.0341933	0.298687	3466.19	4.59764	5.66617	3439.53	5.9345	129.293	3455.48	2.694	56.8335	99.2308		2021-09-10 09:20:56.240	2021-09-10 09:20:56.240	19.54	246.221	57.2791	108.993	Below LOD	911.27	2129.58	272.018	16.1435	2.65788	8.50747	1.27765	1.71264	89.2035	30.9849	60.1586	0.493969	0.227909
OGC_56	Z_OG1	-7.61131	0.019303	116.442	0.79999	-160.23	175.233	1.41854	0.0698552	0.299026	0.00101119	0.220465	0.346733	29.06	1.6879	0.705001	0.0346666	0.472237	3464.35	4.05361	5.23912	3439.55	4.60318	131.107	3455.45	2.88685	57.0074	99.284		2021-09-10 09:35:24.780	2021-09-10 09:35:24.780	25.006	195.366	37.0795	96.2879	Below LOD	690.733	1914.09	252.567	12.6932	2.3182	8.04011	1.05925	1.47418	Below LOD	27.5633	55.0042	0.389744	0.144875
OGC_59	Z_OG1	-1.33146	0.0217307	141.608	0.8	-916.024	87.9289	1.41856	0.0690053	0.298968	0.00105521	0.273272	0.28444	29.06	1.6838	0.705	0.0344144	0.340724	3464.03	4.33661	5.45718	3439.54	5.07325	130.02	3455.46	2.76035	56.7287	99.2929		2021-09-10 10:18:21.296	2021-09-10 10:18:21.296	25.016	258.686	51.6463	120.677	Below LOD	736.888	2404.83	274.454	11.8658	2.80675	8.64648	1.20942	2.03707	Below LOD	25.9555	65.8075	0.45198	0.186725
OGC_60	Z_OG1	-4.39935	0.0206066	133.793	0.799993	-277.158	81.9656	1.41865	0.0690825	0.299204	0.00102786	0.250672	0.29108	29.06	1.69005	0.705	0.0344748	0.632972	3465.26	4.17352	5.33892	3439.5	6.75415	130.226	3455.42	3.37944	57.0565	99.2566		2021-09-10 10:37:44.091	2021-09-10 10:37:44.091	25.008	197.194	48.8949	92.5345	Below LOD	729.564	1776.19	246.315	10.3934	2.29232	6.3191	1.30787	1.56974	Below LOD	21.2036	54.0238	0.477815	0.215142
OGC_62	Z_OG1	1.62839	0.0351888	214.728	0.800111	749.002	119.432	1.41932	0.0689886	0.29895	0.00105259	0.32945	0.930998	29.0602	1.70193	0.705004	0.0347489	0.914404	3463.96	4.32982	5.45617	3439.25	14.9635	130.987	3455.12	6.60028	57.0976	99.2866		2021-09-10 11:06:03.589	2021-09-10 11:06:03.589	21.522	269.928	41.9316	98.2096	Below LOD	1098.59	1868.29	266.162	14.2663	2.43093	16.4164	2.20774	1.6395	124.314	38.8266	54.5152	1.3371	0.317432
OGC_63	Z_OG1	18.3019	0.0316805	189.982	0.799665	66.6305	1509.53	1.41851	0.0691262	0.299087	0.00092625	0.275928	0.448187	29.0599	1.68091	0.704998	0.0343633	0.288465	3464.71	3.47274	4.80926	3439.55	3.73354	129.916	3455.49	2.16231	56.8361	99.2739		2021-09-10 11:19:37.747	2021-09-10 11:19:37.747	25.014	183.683	37.7782	99.338	Below LOD	951.25	1878.21	251.682	10.9979	2.44766	7.97468	0.93816	1.60396	Below LOD	22.7877	52.8171	0.465692	0.188405
OGC_64	Z_OG1	-2.71609	0.0249824	154.189	0.799995	-448.864	96.6532	1.419	0.0675754	0.299179	0.000930656	0.171539	0.27395	29.06	1.67728	0.705	0.0341206	0.860784	3465.18	3.50239	4.83051	3439.36	10.9297	128.565	3455.29	4.65979	56.2247	99.255		2021-09-10 11:34:12.375	2021-09-10 11:34:12.375	25.034	267.577	51.6213	88.9417	Below LOD	780.446	1781.48	274.952	12.1567	2.21468	10.3812	1.3068	1.47565	89.5352	40.5494	49.8669	0.470252	0.199346
OGC_65	Z_OG1	-1.77607	0.0375223	216.617	0.800057	-686.724	97.7897	1.41894	0.0689342	0.298934	0.000851148	0.325242	0.333846	29.06	1.68674	0.705001	0.0344456	0.899741	3463.94	2.90806	4.41444	3439.39	10.4104	130.072	3455.34	4.21148	56.7721	99.2913		2021-09-10 11:47:55.553	2021-09-10 11:47:55.553	25.02	252.893	43.6804	96.4115	Below LOD	940.686	1980.26	255.531	12.611	2.41356	20.2062	2.8119	1.64593	1520.2	372.176	52.5138	1.00246	0.241039
OGC_66	Z_OG1	-5.30887	0.0242148	141.731	0.79992	-229.669	174.467	1.41909	0.0683255	0.299221	0.000948862	0.212322	0.401809	29.0598	1.67371	0.704994	0.0339731	0.896033	3465.39	3.61985	4.90883	3439.31	11.7107	128.42	3455.24	5.13244	56.4878	99.2474		2021-09-10 12:02:21.162	2021-09-10 12:02:21.162	25.017	201.775	49.976	92.7512	Below LOD	913.35	1890.12	256.854	13.2833	2.30897	8.34946	1.04844	1.44679	Below LOD	26.4479	50.6013	0.47893	0.20275
OGC_68	Z_OG1	-2.25705	0.0394392	222.999	0.79684	-540.506	98.1998	1.41862	0.0686047	0.298742	0.000967174	0.315817	0.49471	29.0601	1.68024	0.705012	0.0342895	0.741384	3462.9	3.75196	5.00442	3439.55	6.63829	129.485	3455.42	3.35144	56.586	99.3257		2021-09-10 12:33:12.027	2021-09-10 12:33:12.027	25.011	280.766	56.5612	79.3896	Below LOD	729.495	1580.62	275.015	9.18711	1.96388	11.1212	1.23456	1.28588	47.4162	24.0188	41.4584	0.610428	0.20173
OGC_69	Z_OG1	-2.63096	0.0290797	160.347	0.798674	-463.306	104.066	1.41889	0.0799808	0.299476	0.00100252	0.239303	0.29394	29.0448	1.68328	0.704801	0.0396626	0.476632	3466.69	3.98881	5.19106	3438.81	3.28328	150.027	3454.94	2.86894	57.0046	99.1959		2021-09-10 12:34:30.456	2021-09-10 12:34:30.456	25.061	209.785	40.9601	77.8385	Below LOD	789.347	1582.99	260.091	12.7311	1.91657	9.09707	1.16082	1.30578	Below LOD	20.0288	41.3025	0.249661	0.129275
OGC_70	Z_OG1	-5.93652	0.0233055	133.09	0.799982	-205.445	138.158	1.41765	0.0725182	0.298968	0.000909836	0.249065	0.46608	29.081	1.73464	0.705512	0.0360458	0.768795	3464.09	3.34796	4.71369	3441.43	7.0703	136.272	3456.14	3.16919	58.689	99.3457		2021-09-10 12:35:49.392	2021-09-10 12:35:49.392	25.039	153.245	41.2137	96.6445	Below LOD	892.272	1874.58	253.235	14.2386	2.36553	38.5231	6.71089	1.54014	1478.86	219.17	49.7859	10.654	2.32131
OGC_71	Z_OG1	0.169004	0.0254469	140.138	0.80012	7215.22	101.528	1.4185	0.0625219	0.299147	0.0010445	0.241826	0.437763	29.0602	1.5918	0.705035	0.0310438	0.781046	3464.96	4.27128	5.40904	3439.66	5.2983	117.39	3455.43	3.28908	53.7822	99.27		2021-09-10 12:36:58.731	2021-09-10 12:36:58.731	25.002	208.932	35.7551	89.6755	Below LOD	888.06	1795.66	257.27	11.2206	2.20709	7.05125	1.23044	1.44819	Below LOD	24.7318	46.8657	0.355265	0.149074
[truncated: 120 more columns]

## Sheet: S3
Table S3: Chemical composition of zircon grains from sample D3
MERC Isotope Geochemistry Laboratory, Laurentian University
								Data for Tera-Wasserburg plot							Data for Wetherill plot							Dates								Timing			Trace elements
Identifier	Type	f206c	206Pb	Uppm	Th/U	206Pb/204Pb	1s%	238U/206Pb	prop 2s (abs)	207Pb/206Pb	prop 2s (abs)	208Pb/206Pb	1s%	207Pb/235U	prop 2s (abs)	206Pb/238U	prop 2s (abs)	Rho	207Pb/206Pb	2s (abs)	2ssys (abs)	206Pb/238U	2s (abs)	2ssys (abs)	207Pb/235U	2s (abs)	2ssys (abs)	% conc		Start time	End time	Duration (s)	P31_ppm	P31_ppm_2SE (int)	P31_ppm_LOD	Ca43_ppm	Ca43_ppm_2SE (int)	Ca43_ppm_LOD	Sc45_ppm	Sc45_ppm_2SE (int)	Sc45_ppm_LOD	Ti49_ppm	Ti49_ppm_2SE (int)	Ti49_ppm_LOD	Fe57_ppm	Fe57_ppm_2SE (int)	Fe57_ppm_LOD	Sr88_ppm	Sr88_ppm_2SE (int)
DO1_2_1	big grain	-1.99217	0.0340139	224.562	-4.15881	-711.939	119.265	1.97964	0.098268	0.18397	0.000637396	0.202664	0.141748	12.9434	0.762804	0.505979	0.0251552	0.96685	2688.11	4.50338	5.73029	2638.84	20.4787	107.628	2674.68	9.75502	55.4711	98.1668		2021-09-09 20:32:50.943	2021-09-09 20:32:50.943	19.847	Below LOD	48.9108	125.163	Below LOD	713.319	1608.95	234.146	11.5103	1.87328	3.53294	1.23885	1.34724	94.9765	38.6388	43.1086	6.02558	1.65932
DO1_2_2	big grain	-1.78683	0.0388111	244.312	-2.88184	-791.98	131.312	1.97147	0.0982911	0.185065	0.000603079	0.147115	1.50876	13.0956	0.770857	0.507983	0.0252309	0.906185	2697.91	4.05308	5.37882	2647.48	16.8845	107.909	2685.75	8.27253	55.6398	98.1306		2021-09-09 20:34:01.071	2021-09-09 20:34:01.071	26.053	132.087	54.6644	112.138	Below LOD	733.989	1466.9	226.759	10.8051	1.72668	5.45198	1.03981	1.31175	460.115	82.8454	37.8585	6.16965	0.807849
DO1_2_3	big grain	-3.70962	0.0226452	150.476	-3.21526	-382.25	206.989	2.0621	0.102358	0.183988	0.00073419	0.172219	0.883489	12.4107	0.72688	0.485082	0.0241787	0.637581	2688.15	5.57693	6.61031	2549.26	7.40243	104.873	2636.48	4.74922	52.5801	94.8333		2021-09-09 20:35:21.213	2021-09-09 20:35:21.213	25.013	Below LOD	44.9854	103.768	Below LOD	672.889	1368.78	238.439	9.50714	1.59205	2.58244	0.722116	1.22168	Below LOD	14.0663	35.4654	0.2433	0.112164
DO1_2_4	big grain	-2.01062	0.0536871	420.702	-5.12904	-706.16	148.365	1.9159	0.0980668	0.183276	0.000582469	0.320506	0.247913	13.3035	0.785868	0.522685	0.0260696	0.974302	2681.89	3.88002	5.25219	2710.03	17.9734	110.843	2700.62	8.92677	56.4284	101.049		2021-09-09 20:36:41.826	2021-09-09 20:36:41.826	22.556	168.355	58.2614	143.133	Below LOD	999.947	2001.24	255.586	12.1997	2.1743	8.27807	1.38953	1.6682	163.774	32.3728	50.633	9.17064	1.20807
DO1_2_5	big grain	3.76648	0.0171233	132.385	-1.33239	376.923	156.445	2.25942	0.116766	0.183267	0.000683717	0.111316	1.97339	11.367	0.699731	0.446847	0.0236244	0.9875	2682.5	5.27684	6.44547	2378.23	39.5869	104.813	2549.5	18.6192	56.7241	88.6572		2021-09-09 20:37:56.627	2021-09-09 20:37:56.627	26.059	162.881	50.411	108.263	Below LOD	688.154	1460.48	247.675	14.8745	1.68918	5.09303	0.876429	1.26234	141.189	29.677	37.678	8.2782	1.11534
DO1_2_6	big grain	-0.0199247	0.0177951	129.399	-1.05811	-71201.8	99.1314	2.17662	0.113709	0.183808	0.000676266	0.107738	0.585674	11.7761	0.70434	0.462297	0.0235861	0.983348	2686.59	4.92702	6.06013	2447.73	33.4059	104.327	2584.11	15.4644	56.6596	91.1091		2021-09-09 20:39:16.474	2021-09-09 20:39:16.474	24.394	Below LOD	44.667	105.469	Below LOD	744.667	1468.1	242.976	10.562	1.64078	4.39899	1.19671	1.26714	95.9231	26.0424	37.7511	4.87832	1.28096
DO1_2_7	big grain	87.3587	0.00504502	34.1953	-1.35958	16.2209	161.627	1.9942	0.097934	0.184858	0.00236716	0.170783	1.06423	12.835	0.757825	0.501618	0.0245575	-0.00883518	2693.3	20.7272	21.0235	2620.63	8.83342	105.469	2666.43	11.1443	55.1743	97.3019		2021-09-09 20:40:34.103	2021-09-09 20:40:34.103	20.484	Below LOD	46.1026	110.439	Below LOD	840.394	1509.11	239.592	15.618	1.70859	1.44953	0.673083	1.28897	Below LOD	16.2495	38.7775	Below LOD	0.0711973
DO1_2_8	big grain	6.51155	0.00812837	52.396	-0.474591	217.596	37.0241	1.88837	0.0936085	0.184729	0.00143267	0.104179	1.32945	13.5297	0.789928	0.529641	0.0263702	0.0884687	2693.93	12.2934	12.7911	2739.88	6.10639	111.044	2716.88	6.78369	55.1629	101.706		2021-09-09 20:41:53.374	2021-09-09 20:41:53.374	22.804	Below LOD	48.2457	118.083	Below LOD	617.693	1600.63	228.968	12.0839	1.80287	Below LOD	0.713555	1.44182	Below LOD	26.9928	43.1843	Below LOD	0.0752696
DO1_2_9	big grain	2.01773	0.0834237	495.732	-0.24309	702.911	106.14	1.94167	0.0967106	0.184038	0.000508733	0.113809	0.239491	13.0933	0.77148	0.515105	0.0259756	0.850615	2688.79	2.88454	4.56274	2678.33	5.81677	110.285	2686.27	3.30411	55.3902	99.6109		2021-09-09 20:43:02.550	2021-09-09 20:43:02.550	25.037	Below LOD	52.4977	92.6149	Below LOD	596.861	1287.57	210.359	8.48372	1.48187	2.22468	0.708338	1.15318	Below LOD	16.7044	33.3087	0.464835	0.149199
DO1_2_10	big grain	-14.924	0.0329133	196.419	0.0452378	-95.0366	264.593	1.94211	0.0987195	0.183956	0.000562271	0.132963	0.266458	13.0784	0.765604	0.514807	0.0274187	0.639719	2688.01	3.6044	5.05221	2677.1	3.32427	116.703	2685.26	2.45831	55.2044	99.5939		2021-09-09 20:44:19.759	2021-09-09 20:44:19.759	24.816	Below LOD	49.4293	120.063	Below LOD	566.728	1620.06	216.754	8.98183	1.96914	2.2473	0.617683	1.37848	47.6913	21.2716	44.5066	0.722601	0.210656
DO1_2_11	big grain	7.2294	0.0318563	210.057	0.760808	195.936	241.172	1.98309	0.0996305	0.184788	0.000540899	0.186202	0.173783	12.8554	0.75025	0.504788	0.0248602	0.959293	2695.49	3.29829	4.83638	2633.97	14.3778	106.824	2668.6	6.67303	55.2768	97.7178		2021-09-09 20:46:44.326	2021-09-09 20:46:44.326	25.004	383.061	65.8556	105.112	Below LOD	707.48	1415.27	229.379	10.2974	1.73237	10.7376	1.35209	1.27244	229.063	42.8332	37.3518	8.01264	1.52986
DO1_2_12	big grain	-50.6088	0.019197	134.415	0.917982	-28.0472	514.837	1.98847	0.0990692	0.183467	0.000724912	0.180504	0.548496	12.7151	0.738938	0.502785	0.0246078	0.826731	2683.47	5.48578	6.52881	2625.56	10.2097	105.063	2658.43	5.48946	54.2844	97.842		2021-09-09 20:48:02.895	2021-09-09 20:48:02.895	25.012	Below LOD	57.4267	104.714	Below LOD	778.884	1476.19	233.84	9.51736	1.69591	3.52693	0.770686	1.24364	301.249	147.847	36.9841	3.40022	0.632239
DO1_2_13	big grain	-1.3636	0.0564876	381.34	1.11913	-1040.44	189.235	1.87297	0.0902394	0.183816	0.00049739	0.19365	0.121178	13.5107	0.779205	0.534001	0.0259439	0.863814	2686.8	2.7274	4.46466	2758.22	6.21917	108.862	2715.92	3.22856	54.3667	102.658		2021-09-09 20:49:21.092	2021-09-09 20:49:21.092	23.706	Below LOD	56.7297	127.589	Below LOD	692.822	1814.45	244.174	14.794	2.13123	7.0224	1.13018	1.48699	264.859	57.6478	43.5026	4.12449	0.678498
DO1_2_14	big grain	-39.4089	0.0673322	554.669	1.03735	-35.9734	1697.8	1.92683	0.094117	0.184254	0.000578818	0.175773	0.105246	13.1648	0.765848	0.519084	0.0253963	0.850347	2690.69	3.7858	5.17653	2695.22	6.65283	107.739	2691.38	3.98509	54.744	100.168		2021-09-09 20:50:33.578	2021-09-09 20:50:33.578	22.087	Below LOD	64.1963	138.632	Below LOD	1016.48	2033.46	218.952	13.3506	2.26731	13.1188	1.61017	1.64314	348.698	66.0396	50.8078	17.5276	1.60021
DO1_2_15	big grain	-15.498	0.0164446	103.015	1.01568	-91.4947	325.279	1.96782	0.0943876	0.184143	0.000831665	0.170978	0.30439	12.8837	0.744598	0.508216	0.0244466	0.300525	2689.42	6.57587	7.46948	2648.98	3.76884	104.436	2671	3.8811	54.4784	98.4962		2021-09-09 20:51:47.676	2021-09-09 20:51:47.676	26.636	126.308	52.9894	92.4823	Below LOD	596.698	1341.8	222.473	9.27727	1.51158	2.6429	0.633178	1.12574	Below LOD	14.7731	33.6023	0.247987	0.126854
DO1_2_16	big grain	0.642758	0.093419	783.721	0.544097	2226.77	73.285	2.04577	0.101553	0.178175	0.000468928	0.0888922	0.285726	12.0089	0.706025	0.489814	0.0242991	0.987723	2635.16	2.54304	4.37556	2569.16	19.3549	105.136	2604.1	9.12794	55.0925	97.4954		2021-09-09 20:53:04.860	2021-09-09 20:53:04.860	26.112	2708.96	463.764	120.538	Below LOD	965.181	1710.86	217.794	7.33383	1.98185	8.98959	2.89578	1.3983	435.808	44.0967	46.777	13.2326	1.19914
DO1_2_17	big grain	-3.03649	0.0694478	454.01	1.22109	-467.105	188.905	1.95743	0.0946921	0.18394	0.000557892	0.248116	0.0929834	12.9381	0.748711	0.511082	0.0248561	0.904215	2687.88	3.53959	5.00121	2661.1	9.6467	105.939	2674.92	4.72076	54.4161	99.0035		2021-09-09 20:54:25.616	2021-09-09 20:54:25.616	22.399	118.261	48.6091	104.756	Below LOD	905.899	1465.4	224.287	14.7793	1.70806	6.67735	1.56215	1.27085	191.443	33.4378	40.3059	14.0044	2.50247
DO1_2_18	big grain	-1.55356	0.053514	357.858	0.962492	-913.593	197.346	1.94963	0.0929458	0.183505	0.000569988	0.222715	0.0772787	12.9564	0.746365	0.512949	0.0245022	0.709312	2683.94	3.71934	5.13619	2669.18	3.43644	104.363	2676.39	2.89545	54.3513	99.4501		2021-09-09 20:55:42.175	2021-09-09 20:55:42.175	25.497	Below LOD	46.8365	103.469	Below LOD	593.818	1461.77	233.198	14.4844	1.72368	2.40645	0.781054	1.28422	156.708	42.7282	38.6251	4.81422	3.36958
DO1_2_19	big grain	0.86875	0.0150583	95.0823	0.147603	1633.12	112.802	1.97863	0.0960697	0.183617	0.000847983	0.040144	1.70885	12.7807	0.740205	0.505445	0.024571	0.310334	2684.7	6.75828	7.6285	2637.12	4.16622	105.191	2663.43	4.04639	54.4972	98.228		2021-09-09 20:57:02.344	2021-09-09 20:57:02.344	25.05	Below LOD	39.9473	101.332	Below LOD	650.055	1440.67	206.415	12.074	1.69914	Below LOD	0.825765	1.22806	Below LOD	15.6816	37.7065	0.786305	0.389245
DO1_2_20	big grain	5.43349	0.0175739	112.377	0.306164	260.649	84.4099	1.82398	0.0895444	0.184937	0.000796979	0.110537	0.804798	13.9675	0.809356	0.54857	0.0267059	0.760483	2696.6	6.15098	7.0891	2818.99	11.3202	111.319	2748.01	5.14421	52.5897	104.539		2021-09-09 20:58:20.773	2021-09-09 20:58:20.773	25.047	Below LOD	65.2892	108.545	Below LOD	693.423	1601.27	228.496	13.2541	1.79793	1.86506	0.701697	1.31244	55.0386	25.1386	41.0992	1.37267	0.322568
DO1_2_21	big grain	-2.37853	0.0340856	217.454	0.408396	-596.39	158.177	1.95651	0.0956926	0.183866	0.000586068	0.185343	0.145963	12.9468	0.751181	0.511143	0.0249985	0.598812	2687.18	3.90134	5.26881	2661.49	3.38025	106.64	2675.7	2.76819	54.7448	99.0437		2021-09-09 21:01:40.009	2021-09-09 21:01:40.009	25.062	Below LOD	46.3376	100.13	Below LOD	611.456	1422.13	219.107	10.8028	1.69228	1.69473	0.607559	1.23497	Below LOD	20.9647	40.8299	0.421732	0.192366
DO1_2_22	big grain	0.181406	0.0443056	312.098	0.322462	7817.51	93.9601	1.8658	0.0908022	0.184039	0.000584208	0.148926	0.655026	13.5837	0.789896	0.536134	0.0262158	0.863787	2688.77	3.86346	5.23621	2767.12	9.12235	109.918	2721.7	4.37167	57.9388	102.914		2021-09-09 21:03:02.480	2021-09-09 21:03:02.480	21.019	Below LOD	81.4239	120.157	Below LOD	699.856	1811.99	216.098	10.6773	2.06831	3.56467	0.871085	1.50529	Below LOD	43.0388	46.6217	4.36115	1.36455
DO1_2_23	big grain	-3.97507	0.0254555	171.481	0.332172	-357.129	93.6006	1.96981	0.0947527	0.183374	0.000617324	0.15193	0.256171	12.8224	0.740034	0.507698	0.0245089	0.574976	2682.73	4.28199	5.55081	2646.77	3.70815	104.727	2666.6	2.82169	54.1741	98.6596		2021-09-09 21:04:12.839	2021-09-09 21:04:12.839	25.003	Below LOD	50.5336	100.968	Below LOD	730.551	1520.33	232.873	11.1834	1.69298	1.9582	0.690172	1.22055	Below LOD	20.0831	40.0183	0.261944	0.106078
DO1_2_24	big grain	29.7553	0.0256294	181.177	0.380964	47.7296	938.89	1.98218	0.0968466	0.18317	0.000543234	0.166972	0.51113	12.7341	0.742143	0.504591	0.0247649	0.817653	2680.94	3.39087	4.90375	2633.43	6.231	106.021	2660.04	3.55142	54.811	98.2276		2021-09-09 21:05:31.299	2021-09-09 21:05:31.299	25.008	Below LOD	46.9963	107.397	Below LOD	664.735	1571.54	216.074	10.993	1.81165	2.01241	0.628474	1.28305	Below LOD	23.8022	42.8014	1.96929	0.407213
DO1_2_25	big grain	2.78584	0.0354868	223.429	0.171603	509.101	140.739	2.07587	0.101721	0.183983	0.000699066	0.0776677	1.17532	12.2273	0.710715	0.482124	0.0236815	0.916974	2688.24	5.1805	6.27316	2536.23	16.4385	102.941	2621.68	7.05164	54.2338	94.3454		2021-09-09 21:06:48.181	2021-09-09 21:06:48.181	14.391	Below LOD	53.1911	103.676	Below LOD	881.793	1534.54	221.539	23.4473	1.78074	5.63244	1.13589	1.2692	235.852	77.0635	42.5567	10.6722	2.60773
DO1_2_26	big grain	-0.762337	0.0484737	329.235	0.337785	-1858.71	70.1267	2.02202	0.0994544	0.184581	0.000613503	0.115391	0.230279	12.5887	0.73334	0.494657	0.0242373	0.844516	2693.6	4.20304	5.49861	2590.72	6.70628	104.598	2649.19	4.28754	54.9606	96.1805		2021-09-09 21:08:08.371	2021-09-09 21:08:08.371	21.766	270.942	61.1383	105.289	Below LOD	728.199	1544.36	227.608	12.2326	1.78036	5.31438	1.08597	1.33788	504.177	70.6054	40.8021	25.9428	3.21147
DO1_2_27	big grain	0.607845	0.0294377	208.211	0.478463	2334.87	79.0866	1.92246	0.0935263	0.18363	0.000618274	0.146956	0.566492	13.1712	0.769099	0.520406	0.0255642	0.884355	2685.04	4.30168	5.57677	2700.73	9.79793	108.205	2691.66	5.3663	55.0582	100.584		2021-09-09 21:09:26.733	2021-09-09 21:09:26.733	25.161	Below LOD	55.3332	108.606	Below LOD	890.714	1523.94	227.938	11.1882	1.84839	3.44027	0.86796	1.38011	114.025	32.0232	43.7491	2.32798	0.489592
DO1_2_28	big grain	-5.04784	0.0071005	50.3905	0.422	-280.942	91.7636	1.98276	0.0964743	0.184119	0.00121422	0.117268	1.04449	12.8143	0.745043	0.504453	0.0245333	0.341428	2688.72	10.3068	10.8979	2632.83	6.4659	105.124	2665.7	5.86275	54.8098	97.9211		2021-09-09 21:10:45.721	2021-09-09 21:10:45.721	25.004	Below LOD	60.6264	105.927	Below LOD	758.924	1582.83	228.819	13.4736	1.80643	1.75941	0.648137	1.36067	Below LOD	20.2219	43.3819	0.26956	0.146676
DO1_2_29	big grain	-0.0671538	0.0321858	229.423	0.711197	-21141.5	102.762	1.89241	0.0931098	0.183323	0.000629992	0.181552	0.363004	13.3668	0.778245	0.528699	0.0258869	0.872745	2682.26	4.43653	5.6738	2735.77	10.61	109.249	2705.61	5.18459	55.1608	101.995		2021-09-09 21:12:02.575	2021-09-09 21:12:02.575	24.296	Below LOD	56.8393	110.674	Below LOD	1122.62	1680.51	223.169	15.4697	1.87885	2.93871	0.834037	1.38444	412.567	253.116	45.521	534.98	402.101
DO1_2_30	big grain	4.11984	0.0156322	103.819	0.421646	344.359	60.588	1.95248	0.0946772	0.183815	0.000852735	0.0980669	0.691879	12.9856	0.753539	0.512222	0.0249126	0.470708	2686.47	6.8514	7.72431	2666.07	4.60489	106.14	2678.39	4.4222	54.9735	99.2407		2021-09-09 21:13:22.371	2021-09-09 21:13:22.371	25.01	Below LOD	59.673	110.44	Below LOD	769.749	1766.17	227.113	12.7433	1.96955	1.95202	0.715984	1.4963	Below LOD	24.6277	44.613	0.74146	0.214275
DO1_2_31	big grain	-20.7388	0.011647	80.1422	0.666976	-68.343	90.5943	2.03535	0.0992444	0.184457	0.00115885	0.131347	2.44971	12.4889	0.727165	0.49136	0.023927	0.421062	2691.99	9.73716	10.3579	2576.53	4.64587	103.444	2641.54	6.12689	54.7544	95.7107		2021-09-09 21:15:51.163	2021-09-09 21:15:51.163	20.142	313.194	82.2871	122.8	Below LOD	975.62	1764.82	219.966	9.91991	2.1433	2.28966	0.833988	1.54775	Below LOD	25.6653	52.6358	1.56392	0.345375
DO1_2_32	big grain	-1.59289	0.0385647	251.7	0.574545	-889.97	64.5498	1.96812	0.0980515	0.184083	0.000677243	0.117924	0.726986	12.9117	0.749521	0.508181	0.0249492	0.568512	2689.06	4.93733	6.07367	2648.8	5.64614	106.898	2673.08	3.58067	54.7797	98.5029		2021-09-09 21:16:55.750	2021-09-09 21:16:55.750	25.009	Below LOD	42.1917	99.4222	Below LOD	874.487	1563.68	215.805	11.0197	1.74514	2.59523	0.764965	1.31024	Below LOD	23.5254	40.1233	2.18172	1.29744
DO1_2_33	big grain	-14.6442	0.0190686	134.092	0.873213	-96.8458	790.904	1.98449	0.0979099	0.184012	0.000640773	0.171025	0.26115	12.8006	0.745404	0.503938	0.0249706	0.426097	2688.46	4.5371	5.7551	2630.68	3.48188	106.953	2664.98	3.03524	54.8345	97.8508		2021-09-09 21:18:14.504	2021-09-09 21:18:14.504	25.025	Below LOD	44.3098	104.178	Below LOD	776.812	1612.87	233.592	13.7077	1.85011	2.66315	0.797936	1.28864	74.7196	53.2509	43.9349	3.34139	1.30761
DO1_2_34	big grain	2.1492	0.0116678	76.2344	0.78413	660.605	72.4141	1.99369	0.0974261	0.183354	0.00104151	0.149389	0.519474	12.6846	0.737843	0.501634	0.024493	0.234576	2682.08	8.74405	9.44122	2620.78	4.50213	105.158	2656.22	5.04646	54.8552	97.7143		2021-09-09 21:19:32.884	2021-09-09 21:19:32.884	25.052	241.417	54.2979	96.3139	Below LOD	760.636	1443.32	221.382	9.9796	1.68511	2.35473	0.795618	1.32249	Below LOD	21.2369	40.9131	0.870628	0.281533
DO1_2_35	big grain	-109.999	0.0198664	130.099	0.914913	-12.8867	2735.23	1.98655	0.09826	0.184333	0.00070015	0.178948	0.267172	12.7918	0.74498	0.503431	0.0249114	0.571046	2691.29	5.18264	6.27617	2628.49	4.2952	106.805	2664.32	3.27733	54.795	97.6666		2021-09-09 21:20:51.713	2021-09-09 21:20:51.713	25.006	Below LOD	45.2926	98.0903	Below LOD	570.825	1436.35	218.924	13.3171	1.7364	2.81731	0.704741	1.28998	Below LOD	16.8021	39.1495	3.77589	0.611575
DO1_2_36	big grain	-32.3278	0.0507052	326.587	1.04879	-43.8344	1086.9	1.97986	0.0985124	0.184431	0.000589194	0.202527	0.107285	12.839	0.738099	0.50497	0.0241768	0.715282	2692.26	3.91688	5.28028	2635.81	4.61745	108.319	2667.8	3.07802	54.2705	97.9033		2021-09-09 21:22:10.145	2021-09-09 21:22:10.145	25.036	Below LOD	54.8546	110.793	Below LOD	793.513	1734.94	222.177	11.927	1.91432	2.76381	0.885338	1.43546	Below LOD	23.447	47.7691	1.3328	0.356065
DO1_2_37	big grain	-11.0287	0.0420181	276.097	1.03594	-128.537	339.448	2.02177	0.100179	0.184289	0.000549006	0.20043	0.103788	12.5646	0.731629	0.49466	0.0244413	0.726657	2691.01	3.41688	4.91733	2590.78	4.08817	105.462	2647.49	2.67417	54.7488	96.275		2021-09-09 21:23:24.108	2021-09-09 21:23:24.108	25.036	155.813	63.9847	100.399	Below LOD	847.703	1558.42	224.689	12.6772	1.78415	4.10359	0.958081	1.27363	131.718	88.5794	42.1261	2.5276	0.435143
DO1_2_38	big grain	0.8871	0.0501602	322.25	1.26345	1596.45	93.0624	1.91484	0.0940166	0.185009	0.000617973	0.265401	1.17301	13.3441	0.781819	0.523133	0.0257425	0.978449	2697.4	4.22703	5.51014	2711.8	19.0279	108.89	2703.21	9.82388	55.2517	100.534		2021-09-09 21:24:37.069	2021-09-09 21:24:37.069	24.982	Below LOD	58.3637	109.447	Below LOD	833.1	1718.25	215.787	11.79	1.90381	4.09999	1.20223	1.44829	113.576	32.5735	46.1618	7.22237	2.07526
DO1_2_39	big grain	3.74512	0.00888025	59.125	0.435609	379.528	81.177	2.07841	0.101489	0.18264	0.00116863	0.0884228	1.07456	12.1112	0.704572	0.481216	0.0234756	0.278112	2675.49	10.0101	10.6232	2532.51	5.7679	102.181	2612.7	5.78134	54.5926	94.6558		2021-09-09 21:25:53.900	2021-09-09 21:25:53.900	23.236	Below LOD	46.4476	101.957	Below LOD	806.141	1554.87	224.656	13.6711	1.80013	3.49204	1.24064	1.39805	217.238	68.0476	44.1133	7.72682	3.96038
DO1_2_40	big grain	-31.3379	0.00690794	45.808	0.313356	-45.253	132.531	2.03358	0.0987743	0.184124	0.00118469	0.0637072	1.97088	12.4837	0.725504	0.491835	0.0239655	0.094839	2688.8	10.0363	10.6436	2578.54	6.00406	103.498	2641.17	5.31531	54.8262	95.8994		2021-09-09 21:27:01.721	2021-09-09 21:27:01.721	25.009	Below LOD	49.8463	104.121	Below LOD	713.652	1679.35	222.167	11.0138	1.84189	1.67581	0.813442	1.3377	Below LOD	18.4274	46.6067	Below LOD	0.0385674
DO1_2_41	big grain	-0.906129	0.0400614	242.796	0.749307	-1563.03	109.018	1.93797	0.0951833	0.184885	0.000603173	0.165703	0.294826	13.1579	0.77189	0.516189	0.0255748	0.881078	2696.3	4.06415	5.38928	2682.86	8.34779	108.568	2690.77	4.73055	55.2489	99.5018		2021-09-09 21:30:23.457	2021-09-09 21:30:23.457	26.665	Below LOD	39.9389	90.6042	Below LOD	587.634	1357.08	203.257	11.834	1.60694	2.88539	0.705783	1.22141	Below LOD	22.3308	39.0486	2.36683	0.564974
DO1_2_42	big grain	2.06147	0.0672086	416.746	1.0941	688.118	310.839	1.92703	0.0930949	0.183932	0.00053714	0.240663	0.121074	13.1611	0.7736	0.519221	0.0257439	0.930183	2687.82	3.27447	4.81851	2695.66	10.8711	108.739	2690.94	5.33369	54.8892	100.292		2021-09-09 21:31:43.957	2021-09-09 21:31:43.957	25.01	Below LOD	43.6645	135.676	Below LOD	900.232	2278.21	213.752	11.7315	2.30777	2.50464	0.66672	1.61552	165.45	42.7774	56.5578	1.88453	0.451997
DO1_2_43	big grain	6.33586	0.0460097	287.046	0.698178	223.775	685.073	1.97111	0.0966481	0.184197	0.000613018	0.156926	0.149518	12.8883	0.754728	0.507375	0.0251269	0.664303	2690.13	4.21493	5.50818	2645.38	4.31398	107.274	2671.4	3.1936	55.1577	98.3363		2021-09-09 21:33:02.296	2021-09-09 21:33:02.296	25.15	Below LOD	43.6128	94.7979	Below LOD	596.76	1446.98	211.461	12.2061	1.67481	2.66498	0.857104	1.21991	Below LOD	19.6617	41.7663	1.37309	0.656912
DO1_2_44	big grain	2.76132	0.0561653	367.805	0.810434	513.557	180.05	1.91053	0.0944899	0.184062	0.000566816	0.188856	0.235016	13.2896	0.783978	0.52371	0.0260923	0.930875	2688.96	3.66014	5.09564	2714.68	10.9417	110.241	2700.09	5.52019	55.5488	100.956		2021-09-09 21:34:16.227	2021-09-09 21:34:16.227	25.024	Below LOD	49.9575	98.9685	Below LOD	713.181	1530.72	211.228	9.84155	1.81537	4.252	1.1024	1.33436	97.4025	38.0586	43.0442	3.21446	0.747329
DO1_2_45	big grain	-3.38926	0.0418887	285.249	0.220448	-418.598	132.344	1.95477	0.0974711	0.183769	0.00056448	0.05291	0.6481	12.9787	0.766438	0.512273	0.0255265	0.965727	2686.33	3.64427	5.08549	2665.82	16.709	108.814	2677.4	7.85236	55.7444	99.2364		2021-09-09 21:35:34.539	2021-09-09 21:35:34.539	25.205	141.832	53.6181	100.479	Below LOD	824.009	1542.73	214.337	10.155	1.79308	6.44255	1.45951	1.3451	124.864	41.4174	43.4197	5.31248	0.995065
DO1_2_46	big grain	162.672	0.0182806	111.271	0.58677	8.71071	2697.09	1.96557	0.0955968	0.184578	0.000688264	0.143309	0.36155	12.9462	0.750366	0.508792	0.0247999	0.436936	2693.49	5.04202	6.16016	2651.45	3.57344	105.919	2675.63	3.19081	54.5854	98.4392		2021-09-09 21:36:53.474	2021-09-09 21:36:53.474	25.32	Below LOD	44.4544	87.8633	Below LOD	664.161	1361.22	214.742	10.2415	1.57739	1.80677	0.693353	1.20495	Below LOD	16.3177	37.7591	0.185719	0.0993464
DO1_2_47	big grain	-0.287869	0.0788385	629.095	0.607491	-4958.45	65.7591	1.86189	0.0944654	0.179979	0.000614117	0.169249	0.29469	13.356	0.78109	0.537745	0.0264705	0.948065	2651.76	4.40263	5.65684	2773.53	15.6822	111.51	2704.46	7.55787	55.9678	104.592		2021-09-09 21:38:09.380	2021-09-09 21:38:09.380	26.488	Below LOD	61.0946	148.623	Below LOD	1051.69	2298.25	218.841	15.5618	2.67213	8.77403	1.58562	2.27222	343.143	50.1066	64.9836	13.348	2.59814
DO1_2_48	big grain	39.0818	0.0154722	96.8815	0.446854	36.2882	540.765	1.95819	0.0938373	0.18403	0.000768355	0.114174	0.594624	12.9579	0.745902	0.51077	0.0244164	0.620965	2688.5	5.93022	6.90904	2659.85	6.16975	104.223	2676.38	4.31755	54.2999	98.9343		2021-09-09 21:39:12.476	2021-09-09 21:39:12.476	25.048	Below LOD	44.9181	88.0429	Below LOD	664.24	1378.07	220.7	10.6188	1.5932	Below LOD	0.670047	1.17186	Below LOD	21.9554	39.7805	0.118169	0.0833493
DO1_2_49	big grain	-5.99874	0.00686254	42.1053	0.547766	-236.586	47.9076	1.9682	0.0958451	0.183434	0.00126297	0.147382	0.936324	12.8487	0.747417	0.508198	0.0247127	0.221234	2682.46	10.8318	11.3976	2648.85	6.85906	105.644	2668.19	6.11766	54.7854	98.7467		2021-09-09 21:40:31.020	2021-09-09 21:40:31.020	25.044	Below LOD	38.039	111.79	Below LOD	731.553	1589.48	215.351	9.45043	1.98824	2.35111	0.785162	1.40155	Below LOD	23.7656	46.9296	0.218361	0.103111
DO1_2_50	big grain	0.309716	0.065184	454.093	0.440731	4573.05	115.175	1.83644	0.0892809	0.184863	0.000577113	0.128462	0.788943	13.8887	0.808507	0.544978	0.0266811	0.948639	2696.13	3.75869	5.16753	2803.92	13.4497	111.177	2741.66	6.49672	55.1591	103.998		2021-09-09 21:41:40.569	2021-09-09 21:41:40.569	25.082	110.222	56.9484	107.084	Below LOD	699.916	1664.98	219.685	12.9136	1.94715	8.14608	1.2127	1.45782	547.975	72.5572	46.4277	8.77066	1.42282
DO1_2_51	big grain	2.17303	0.0134489	81.6169	0.590322	652.048	82.9558	1.96293	0.0953879	0.184626	0.000824366	0.1666	0.458313	12.9653	0.752633	0.509483	0.0248405	0.48019	2693.78	6.50062	7.4091	2654.39	3.97735	106.021	2676.93	4.21046	54.7769	98.5376		2021-09-09 21:44:13.530	2021-09-09 21:44:13.530	25.137	297.037	67.6321	83.7907	Below LOD	556.708	1371.46	207.728	8.27849	1.53105	2.59519	0.965976	1.14755	Below LOD	17.703	37.7577	1.1645	0.419416
DO1_2_52	big grain	-0.165351	0.028287	173.434	0.520057	-8578.04	86.4447	1.93695	0.093373	0.183932	0.000598072	0.157167	0.204496	13.0822	0.756099	0.51631	0.0250347	0.594952	2687.77	4.03961	5.36995	2683.49	3.65588	106.324	2685.51	2.72352	54.4258	99.8407		2021-09-09 21:45:32.150	2021-09-09 21:45:32.150	25.005	Below LOD	46.155	85.5632	Below LOD	775.234	1374	215.308	8.57404	1.57218	2.02748	0.760161	1.19583	Below LOD	17.6513	36.8261	0.232884	0.124259
DO1_2_53	big grain	4.98663	0.027995	166.642	0.360055	284.344	93.5639	1.94339	0.0932322	0.184019	0.000593519	0.114467	0.751901	13.0552	0.75427	0.514599	0.024722	0.51697	2688.56	3.97056	5.3115	2676.21	3.67884	105.193	2683.54	3.0458	54.3954	99.5407		2021-09-09 21:46:50.652	2021-09-09 21:46:50.652	25.008	Below LOD	41.0636	83.2024	Below LOD	596.93	1303.15	211.105	10.9306	1.54932	1.94537	0.736579	1.19041	Below LOD	17.8496	37.4899	0.835643	0.223309
DO1_2_54	big grain	-0.0752817	0.0436305	262.386	0.526627	-18831.9	73.1757	1.93888	0.0938183	0.184302	0.000536443	0.172228	0.153557	13.0903	0.72333	0.515787	0.02501	0.644643	2691.13	3.25344	4.80602	2681.27	3.0695	106.325	2686.48	2.51506	54.3363	99.6335		2021-09-09 21:48:07.107	2021-09-09 21:48:07.107	26.961	Below LOD	47.0127	81.2671	Below LOD	641.778	1320.12	226.688	13.5939	1.50341	2.07659	0.557332	1.10765	Below LOD	17.7845	37.2894	0.620998	0.224097
DO1_2_55	big grain	-2.0355	0.0292757	181.647	0.103162	-696.523	110.951	1.96325	0.0929067	0.184139	0.000613802	0.0348294	1.20326	12.9224	0.73991	0.509413	0.024345	0.791697	2689.61	4.21086	5.49632	2654.08	4.61772	103.796	2673.86	3.57792	53.629	98.679		2021-09-09 21:49:27.835	2021-09-09 21:49:27.835	25.012	Below LOD	52.4351	86.9221	Below LOD	711.703	1421.09	211.158	10.2584	1.64479	4.06576	1.52495	1.17739	Below LOD	21.642	39.8609	1.27537	0.42651
DO1_2_56	big grain	1.45317	0.0451271	261.762	0.573432	974.31	101.357	1.87805	0.0908972	0.185095	0.000551002	0.206791	0.70652	13.588	0.780222	0.532798	0.0256807	0.936299	2698.22	3.40839	4.90886	2752.99	11.5838	108.074	2721.08	5.53264	54.4375	102.03		2021-09-09 21:50:45.866	2021-09-09 21:50:45.866	25.013	Below LOD	40.432	87.8441	Below LOD	634.279	1385.98	208.891	9.18406	1.61056	3.15025	0.799481	1.2102	160.806	57.6776	39.6742	2.75166	0.673591
DO1_2_57	big grain	0.131079	0.0111745	72.1331	0.482125	10815	82.015	2.01562	0.0988237	0.18434	0.0010624	0.171808	0.509267	12.6051	0.733649	0.496171	0.0243328	0.334494	2690.92	8.84656	9.52937	2597.29	4.21866	104.834	2650.27	5.33934	54.7018	96.5204		2021-09-09 21:52:03.993	2021-09-09 21:52:03.993	25.003	Below LOD	43.2711	91.1477	Below LOD	852.605	1435.79	220.95	12.2381	1.67685	1.73472	0.709199	1.18828	Below LOD	20.4585	41.0752	0.207979	0.115147
DO1_2_58	big grain	28.4403	0.00348943	22.3946	0.313562	49.9676	475.048	2.01675	0.0985107	0.18334	0.00308533	0.122417	1.9236	12.5257	0.752136	0.496228	0.0243864	0.0566294	2676.66	28.3499	28.5824	2597.29	12.8074	104.943	2642.2	15.2667	56.8579	97.0348		2021-09-09 21:53:14.223	2021-09-09 21:53:14.223	22.87	Below LOD	47.1794	90.4086	Below LOD	856.908	1463.34	209.889	12.6922	1.69766	1.45514	0.707202	1.24022	Below LOD	21.7402	40.9531	0.232719	0.121004
DO1_2_59	big grain	0.0513836	0.0187023	115.266	0.466597	27613.7	99.5608	2.0002	0.0964215	0.18371	0.000694653	0.175007	0.436289	12.6535	0.732634	0.499975	0.0241156	0.402246	2685.69	5.17457	6.27969	2613.67	3.08752	103.63	2654.09	3.21076	54.6368	97.3183		2021-09-09 21:54:27.308	2021-09-09 21:54:27.308	25.034	Below LOD	44.4483	83.8771	Below LOD	716.438	1372.8	213.402	9.44902	1.53707	2.13784	0.740269	1.10744	Below LOD	20.2331	39.0609	0.230566	0.113423
DO1_2_60	big grain	-142.072	0.00717181	46.9103	0.224991	-9.9731	283.374	2.03383	0.0983162	0.184286	0.00132041	0.0849031	2.1358	12.507	0.727964	0.49178	0.0238567	0.446965	2691.91	11.9894	12.5034	2578.3	6.13167	103.025	2643.93	7.06824	57.8586	95.7797		2021-09-09 21:55:41.300	2021-09-09 21:55:41.300	25.066	Below LOD	44.8519	120.493	Below LOD	632.352	1887.96	225.203	13.244	2.25674	1.82978	0.689082	1.60898	Below LOD	18.0846	56.827	0.365441	0.148191
DO1_2_61	big grain	-0.373411	0.00549782	37.1918	0.202603	-3766.37	99.612	2.02485	0.0985973	0.186344	0.00337944	0.0952713	9.8005	12.6235	0.752608	0.494007	0.0241009	-0.391531	2703.53	25.6168	25.7974	2587.89	7.50677	103.944	2650.18	12.0825	49.9054	95.7227		2021-09-09 21:59:09.819	2021-09-09 21:59:09.819	25.005	Below LOD	44.322	94.5552	Below LOD	661.717	1504.63	231.219	14.1521	1.71484	1.34593	0.593496	1.26918	Below LOD	17.7344	44.9123	Below LOD	0.0319027
DO1_2_62	big grain	4.73929	0.0629651	387.273	0.392952	299.306	135.423	1.98223	0.095642	0.183636	0.000550838	0.157298	0.336093	12.7766	0.747332	0.504793	0.0248754	0.891492	2685.15	3.47637	4.96663	2634.13	11.9104	106.177	2663.01	5.5557	54.6742	98.1		2021-09-09 22:00:21.872	2021-09-09 22:00:21.872	21.936	Below LOD	42.6465	90.699	Below LOD	759.951	1467.92	211.25	10.6303	1.71735	3.67051	0.792977	1.23622	63.9743	21.6622	41.2916	3.37388	0.50849
DO1_2_63	big grain	-0.793312	0.0179854	113.748	0.472058	-1788.48	75.962	2.00522	0.0987314	0.183739	0.000658858	0.178722	0.32104	12.6346	0.739057	0.498773	0.0247253	0.645859	2685.98	4.75069	5.92416	2608.47	5.40667	106.223	2652.65	3.52366	55.0387	97.1141		2021-09-09 22:01:37.707	2021-09-09 22:01:37.707	25.044	Below LOD	39.1009	85.525	Below LOD	719.938	1394.32	217.023	12.278	1.62735	1.89325	0.623103	1.19212	Below LOD	18.8254	39.9463	0.163377	0.0895861
DO1_2_64	big grain	-2.04635	0.0160942	102.569	0.441504	-693.159	142.828	2.0462	0.0999768	0.183926	0.000792663	0.153959	0.427518	12.3885	0.719349	0.48874	0.023817	0.19197	2687.54	6.18467	7.12765	2565.2	3.40427	103.173	2634.16	3.47615	54.5619	95.4479		2021-09-09 22:02:51.706	2021-09-09 22:02:51.706	25.014	644.963	64.8685	112.172	Below LOD	623.281	1749.11	217.043	7.64161	2.01447	2.64339	0.792565	1.49956	Below LOD	19.3588	48.2854	0.598976	0.204751
DO1_2_65	big grain	-2.62326	0.0346307	215.972	0.509168	-540.615	123.042	1.95433	0.0966045	0.184023	0.000564128	0.188633	0.185747	12.987	0.758523	0.511708	0.025396	0.597422	2688.63	3.62908	5.07346	2663.9	3.29155	108.221	2679.1	2.24367	51.5324	99.0801		2021-09-09 22:04:13.318	2021-09-09 22:04:13.318	21.622	Below LOD	50.1121	97.5425	Below LOD	713.107	1522.42	225.207	11.0028	1.79513	2.41599	0.849503	1.28399	Below LOD	21.7211	38.9695	0.633768	0.211815
DO1_2_66	big grain	0.313496	0.0393277	244.823	0.532793	4521.62	103.336	1.96775	0.0973025	0.184328	0.000539803	0.197531	0.133387	12.918	0.755977	0.508226	0.0253079	0.672056	2691.37	3.29828	4.83743	2649.03	3.54692	108.04	2673.61	2.53471	55.1469	98.4268		2021-09-09 22:05:28.196	2021-09-09 22:05:28.196	25.122	Below LOD	45.8574	90.4703	Below LOD	743.778	1531.25	214.109	8.45864	1.67214	2.99343	1.18745	1.26499	Below LOD	20.2985	40.9491	0.339453	0.103428
DO1_2_67	big grain	-4.25082	0.0305966	198.476	0.491979	-333.655	78.764	1.95903	0.0974463	0.183966	0.000583255	0.178079	0.185824	12.9503	0.753215	0.510479	0.0254645	0.515588	2688.1	3.86451	5.24268	2658.66	3.11107	108.623	2675.97	2.57357	54.7423	98.9048		2021-09-09 22:06:44.297	2021-09-09 22:06:44.297	23.242	Below LOD	45.4439	91.4158	Below LOD	922.687	1454.34	211.994	10.8316	1.70998	3.99277	1.15904	1.26529	Below LOD	21.2838	39.7063	0.953812	0.239277
DO1_2_68	big grain	-11.2633	0.006477	41.368	0.186339	-125.83	70.5603	1.97677	0.0966062	0.184573	0.00144678	0.0673406	2.10169	12.874	0.74998	0.505977	0.0246675	0.0295599	2692.38	12.4732	12.9669	2639.36	6.30067	105.629	2669.97	6.63941	54.7792	98.0308		2021-09-09 22:08:01.178	2021-09-09 22:08:01.178	25.02	Below LOD	38.7554	91.4733	Below LOD	758.124	1499.94	216.843	11.3454	1.73414	Below LOD	0.718031	1.22234	Below LOD	20.464	41.1839	0.154136	0.118812
DO1_2_69	big grain	-28.2675	0.0423634	258.895	0.503013	-50.216	1919.01	1.94125	0.0945873	0.183365	0.000522528	0.181408	0.243149	13.0096	0.759545	0.515208	0.0254646	0.80531	2682.72	3.10097	4.70198	2678.77	5.50411	108.071	2680.77	2.82968	58.4713	99.8527		2021-09-09 22:09:19.716	2021-09-09 22:09:19.716	25.029	Below LOD	33.76	81.5196	Below LOD	616.29	1310.53	214.214	9.71362	1.53177	4.5694	1.29866	1.17671	515.846	114.383	37.5694	1.92311	0.403255
DO1_2_70	big grain	13.0037	0.00851584	71.886	0.23276	109.009	159.507	2.42162	0.120908	0.183577	0.00117137	0.111926	7.26475	10.4953	0.619314	0.413733	0.0204195	0.711082	2683.88	9.97134	10.5857	2231.45	16.7248	93.1722	2478.16	10.5052	52.2959	83.1425		2021-09-09 22:10:37.613	2021-09-09 22:10:37.613	25.753	Below LOD	48.7962	89.0926	Below LOD	763.415	1529.84	242.321	13.9181	1.68679	4.99995	0.895263	1.23404	184.798	35.2473	42.0748	6.32492	0.920295
DO1_2_71	big grain	29.7868	0.0141827	104.628	0.28536	47.4905	214.177	1.91842	0.0924253	0.184541	0.00110491	0.107437	3.54597	13.2604	0.772684	0.521333	0.0254451	0.729382	2692.77	9.05063	9.69236	2704.78	5.67696	107.565	2697.98	6.08866	52.9969	100.446		2021-09-09 22:17:35.174	2021-09-09 22:17:35.174	22.011	Below LOD	63.8033	96.6392	Below LOD	763.852	1581	206.348	17.5831	1.8445	2.22341	0.856727	1.31002	68.7469	27.458	45.2053	0.943716	0.29188
DO1_2_72	big grain	8.18062	0.0597448	368.131	0.426829	173.299	421.17	1.94085	0.0946127	0.184171	0.000556749	0.163531	0.325849	13.0882	0.760958	0.515281	0.0252917	0.701215	2689.97	3.52969	5.00226	2679.11	4.47223	107.469	2685.94	2.97696	54.7646	99.5961		2021-09-09 22:18:50.823	2021-09-09 22:18:50.823	20.998	Below LOD	48.726	86.0919	Below LOD	707.623	1389.69	212.185	12.2724	1.63562	4.76071	1.03464	1.17384	58.7189	25.3062	40.6902	2.88449	0.729926
DO1_2_73	big grain	-1.28891	0.027852	191.431	0.185792	-1101.41	105.188	1.91968	0.09241	0.183372	0.000620017	0.0714665	0.48733	13.1638	0.759445	0.521086	0.0252739	0.801733	2682.71	4.32711	5.59248	2703.66	8.12558	106.966	2691.27	4.1078	54.2269	100.781		2021-09-09 22:20:08.229	2021-09-09 22:20:08.229	25.008	Below LOD	52.4489	98.0436	Below LOD	640.174	1669.13	224.572	13.2908	1.83172	3.39472	0.799163	1.27865	64.9517	30.1427	44.6959	3.60301	0.732971
DO1_2_74	big grain	0.814215	0.0344841	220.678	0.534766	1741.86	98.5279	1.95078	0.0949251	0.183992	0.00055533	0.200181	0.295557	12.9926	0.752772	0.51265	0.0248562	0.736027	2688.34	3.51816	4.99508	2667.91	3.71803	105.992	2679.02	2.87295	54.7075	99.2401		2021-09-09 22:21:26.836	2021-09-09 22:21:26.836	25.022	Below LOD	33.7788	82.9829	Below LOD	777.824	1386.02	226.255	11.4789	1.58677	2.20987	0.719505	1.17992	Below LOD	16.0393	39.0987	0.367227	0.201348
DO1_2_75	big grain	-6.91861	0.0119576	76.8513	0.249618	-205.129	82.8004	1.95804	0.100076	0.183606	0.00099798	0.096743	0.737975	12.9171	0.754822	0.510574	0.0252099	0.506778	2684.41	8.26175	8.98947	2658.99	7.10045	107.379	2673.28	5.41795	54.9971	99.053		2021-09-09 22:22:45.466	2021-09-09 22:22:45.466	25.005	Below LOD	40.2291	83.7179	Below LOD	579.369	1396.44	216.161	10.8878	1.62066	1.66673	0.736347	1.15134	Below LOD	18.4573	38.3063	0.223951	0.130174
DO1_2_76	big grain	3.28513	0.00628841	43.4832	0.147497	431.265	109.925	1.99546	0.0932644	0.184851	0.00167211	0.0590998	2.34664	12.7503	0.74667	0.501	0.0246116	0.201674	2694.42	14.5454	14.9713	2617.97	8.19592	105.657	2660.61	8.20751	55.1192	97.1625		2021-09-09 22:23:59.391	2021-09-09 22:23:59.391	25.006	Below LOD	40.7807	87.4705	Below LOD	650.625	1413.96	213.795	11.6988	1.65247	Below LOD	0.987913	1.24918	Below LOD	20.0207	39.9415	Below LOD	0.0817581
DO1_2_77	big grain	46.3916	0.00555552	38.0704	0.308515	30.5936	106.881	1.99502	0.0979209	0.183773	0.00194099	0.12384	1.22305	12.6731	0.745592	0.501442	0.0246645	0.211592	2684.08	17.2111	17.5764	2619.85	8.77214	105.845	2654.58	9.74409	55.473	97.607		2021-09-09 22:25:18.027	2021-09-09 22:25:18.027	25.023	Below LOD	40.3386	87.8633	Below LOD	738.502	1458.11	221.154	11.945	1.70565	Below LOD	0.544257	1.19874	Below LOD	15.7152	40.5451	Below LOD	0.0746755
DO1_2_78	big grain	-2.63619	0.0191078	142.894	0.368492	-539.096	141.23	1.98296	0.0975011	0.182687	0.000805873	0.145092	0.46678	12.6862	0.738015	0.504388	0.0246901	0.716147	2676.39	6.36376	7.2799	2632.56	6.53393	105.874	2656.39	5.07531	54.7342	98.3624		2021-09-09 22:26:40.367	2021-09-09 22:26:40.367	21.298	128.85	59.9486	103.295	Below LOD	856.797	1727.15	235.966	12.0155	1.98072	3.86216	0.966796	1.45132	69.7812	30.7154	48.3524	3.58752	0.952931
DO1_2_79	big grain	-0.821077	0.0203409	133.329	0.488133	-1728.8	74.8166	1.98958	0.0984909	0.183348	0.000696756	0.192147	0.300487	12.6899	0.738348	0.502659	0.0249105	0.412433	2682.43	5.18727	6.28039	2625.19	4.01567	106.844	2656.8	3.07944	54.7051	97.866		2021-09-09 22:27:50.500	2021-09-09 22:27:50.500	25.047	Below LOD	48.0721	82.5545	Below LOD	653.466	1386.02	212.076	9.17198	1.57288	2.01725	0.713286	1.17058	Below LOD	14.3226	38.4396	0.179537	0.104136
DO1_2_80	big grain	2.09529	0.0476139	323.393	0.481802	674.606	116.739	1.97223	0.0973514	0.186181	0.000664062	0.197066	0.455835	13	0.748178	0.507064	0.0250391	0.806672	2707.8	4.69583	5.87473	2644.07	3.07735	107.095	2679.56	2.86469	54.1614	97.6464		2021-09-09 22:29:08.855	2021-09-09 22:29:08.855	25.049	Below LOD	46.4428	124.9	Below LOD	741.31	2172.58	210.255	11.3618	2.42283	2.2582	0.900346	1.692	182.942	35.6105	60.3228	6.06913	1.199
DO1_2_81	big grain	-63.2759	0.00640136	46.4104	0.0852278	-22.4151	242.98	2.0441	0.102151	0.184137	0.00168873	0.0379723	6.74643	12.4138	0.730212	0.4895	0.0240239	0.580075	2687.97	14.7786	15.199	2568.31	10.561	104.256	2636.83	9.35383	53.1449	95.5482		2021-09-09 22:32:42.302	2021-09-09 22:32:42.302	25.018	Below LOD	49.0333	95.2399	Below LOD	658.379	1585.25	225.155	14.9625	1.79595	Below LOD	0.603822	1.29302	Below LOD	21.4567	44.5389	0.172638	0.108297
DO1_2_82	big grain	14.361	0.0190246	159.069	0.40928	98.505	318.776	2.20199	0.113714	0.185229	0.00106746	0.177138	2.40822	11.6419	0.689269	0.455014	0.0226199	0.862161	2698.96	8.86347	9.54743	2416.91	19.5566	100.768	2574.69	11.8092	56.632	89.5498		2021-09-09 22:33:52.140	2021-09-09 22:33:52.140	21.4	185.308	53.1185	106.264	Below LOD	905.652	1758.59	216.511	15.8277	2.12151	10.0743	1.56222	1.48561	170.393	35.3821	51.2147	20.4756	2.5131
DO1_2_83	big grain	-46.2001	0.0554633	448.448	0.23448	-30.6923	1798.51	1.86827	0.0906159	0.18412	0.000664686	0.0927697	1.29315	13.579	0.786605	0.535341	0.0259008	0.778006	2690.2	4.56401	5.67059	2763.85	6.07399	108.794	2720.61	4.21812	54.9258	102.738		2021-09-09 22:35:01.563	2021-09-09 22:35:01.563	23.709	Below LOD	53.4368	112.104	Below LOD	1202.23	1895.28	228.164	17.5892	2.18365	8.11487	1.52163	1.58835	601.463	117.58	50.5379	13.5683	1.85822
DO1_2_84	big grain	230.966	0.00465409	33.7685	0.256342	6.13722	1685.03	2.01125	0.0982704	0.184648	0.00215369	0.0978819	2.04607	12.6506	0.744453	0.497389	0.0242598	0.0285732	2691.45	18.8952	19.2222	2602.43	8.65398	104.46	2652.82	10.1844	55.328	96.6925		2021-09-09 22:36:20.006	2021-09-09 22:36:20.006	24.629	Below LOD	45.8905	90.9602	Below LOD	786.804	1518.6	224.157	14.9212	1.74756	2.08259	0.709422	1.23217	Below LOD	23.8889	41.7228	0.20188	0.116129
DO1_2_85	big grain	-15.9565	0.00676241	49.0738	0.331059	-88.8784	181.281	2.04226	0.0994738	0.18418	0.00158832	0.119809	1.15888	12.4294	0.725246	0.489764	0.0238817	-0.0161932	2688.58	13.7423	14.1871	2569.58	6.58066	103.315	2636.8	7.20646	54.7652	95.5738		2021-09-09 22:37:38.661	2021-09-09 22:37:38.661	25.003	Below LOD	51.2526	89.9054	Below LOD	747.492	1523.9	228.939	15.8915	1.7448	2.03207	0.767802	1.30396	Below LOD	13.0996	42.3086	Below LOD	0.0830119
DO1_2_86	big grain	-1.9192	0.0539308	367.193	0.526701	-739.188	121.036	1.97098	0.0953482	0.183816	0.000654053	0.193958	0.113252	12.8552	0.745	0.507396	0.0247009	0.687244	2686.69	4.7102	5.89993	2645.48	3.83148	105.519	2668.98	3.39155	54.5832	98.466		2021-09-09 22:38:54.960	2021-09-09 22:38:54.960	23.166	Below LOD	50.5395	86.1501	Below LOD	788.467	1501.36	214.232	15.7684	1.67966	2.55833	0.820387	1.18932	445.637	109	39.0029	3.03681	0.568954
DO1_2_87	big grain	-0.433241	0.0425109	290.847	0.512909	-3272.13	109.096	1.94591	0.0944504	0.184285	0.000628633	0.18666	0.28904	13.0599	0.75556	0.513924	0.0249515	0.575932	2690.9	4.38854	5.63895	2673.34	3.16152	106.239	2683.87	3.02944	54.5929	99.3474		2021-09-09 22:40:14.625	2021-09-09 22:40:14.625	26.698	Below LOD	36.6928	89.1543	Below LOD	729.429	1528.94	207.13	17.9668	1.73686	1.6428	0.632022	1.24883	Below LOD	22.0134	39.9933	1.26066	0.424623
DO1_2_88	big grain	-3.53042	0.0229368	161.507	0.378746	-401.58	83.865	1.98668	0.0968076	0.184122	0.00067834	0.127732	0.369607	12.7713	0.743072	0.503427	0.0246507	0.661546	2689.41	4.94153	6.07464	2628.45	5.41737	105.607	2662.8	3.42902	54.6866	97.7335		2021-09-09 22:41:34.935	2021-09-09 22:41:34.935	25.034	274.039	45.9318	92.5518	Below LOD	809.081	1538.46	200.767	9.82991	1.77699	3.01845	0.819897	1.27748	Below LOD	25.0287	43.742	0.749855	0.19199
DO1_2_89	big grain	-24.7483	0.0313819	236.501	1.07099	-56.8747	627.844	1.98692	0.10232	0.18894	0.000720548	0.333663	0.173668	13.135	0.765434	0.504011	0.0248578	0.931301	2732.04	5.19432	6.27875	2630.51	18.9626	107.286	2688.84	7.97106	55.6923	96.2836		2021-09-09 22:42:53.694	2021-09-09 22:42:53.694	19.396	1172.56	95.2548	103.843	Below LOD	870.692	1783.98	203.381	9.96913	2.03932	7.79237	1.56297	1.38826	362.569	56.2767	48.7449	15.4848	1.40983
DO1_2_90	big grain	-37.5899	0.0107801	71.7281	0.152711	-37.7059	187.791	2.01787	0.0969923	0.184462	0.00109249	0.0560845	1.77234	12.6147	0.732	0.49566	0.0239476	0.459945	2691.97	9.15535	9.82021	2595.06	5.89657	103.122	2650.92	5.85613	54.5702	96.3998		2021-09-09 22:44:11.737	2021-09-09 22:44:11.737	25.056	Below LOD	44.3231	100.647	Below LOD	776.966	1713.59	200.832	14.8779	1.95181	Below LOD	0.674832	1.47075	Below LOD	18.5826	49.2801	0.337803	0.136905
DO1_2_91	big grain	-2.4201	0.0284983	191.4	0.552087	-585.7	82.101	2.01382	0.0967064	0.184365	0.000658093	0.190003	0.388102	12.6333	0.730762	0.496585	0.0238855	0.283286	2691.61	4.7153	5.89508	2599.09	2.49737	102.856	2652.61	2.78045	54.5043	96.5629		2021-09-09 22:46:48.997	2021-09-09 22:46:48.997	25.014	400.158	68.8238	83.7091	Below LOD	799.183	1435.91	214.88	9.76529	1.64335	2.9118	0.723408	1.19938	Below LOD	20.7254	41.0403	0.814164	0.219033
DO1_2_92	big grain	-5.2089	0.00714436	53.2258	0.252737	-271.945	72.9496	1.96912	0.0950747	0.184383	0.00147151	0.106767	2.63882	12.9701	0.757258	0.508033	0.024551	0.41073	2692.84	13.4252	13.9367	2648.09	8.78655	104.924	2676.67	8.39967	55.0742	98.338		2021-09-09 22:48:07.408	2021-09-09 22:48:07.408	25.008	Below LOD	46.2808	95.5803	Below LOD	963.887	1659.08	224.427	17.2265	1.89304	6.07093	4.05182	1.37335	58.6357	35.2073	42.5232	0.476248	0.220419
DO1_2_93	big grain	13.702	0.00668564	46.8669	0.178624	103.475	90.0488	1.98501	0.0960009	0.18432	0.00147136	0.075503	1.6907	12.8154	0.74696	0.503944	0.024409	0.325173	2690.08	12.7129	13.1971	2630.6	8.21252	104.592	2665.52	7.5674	54.8876	97.789		2021-09-09 22:49:21.343	2021-09-09 22:49:21.343	25.003	Below LOD	42.3732	86.1392	Below LOD	822.046	1439.7	216.089	15.6865	1.70014	1.56134	0.631083	1.25956	607.321	135.276	40.2827	1.86745	0.458169
DO1_2_94	big grain	-1.02946	0.0316023	254.629	0.347901	-1376.52	164.808	2.16309	0.108145	0.184546	0.000844423	0.170434	0.481235	11.7995	0.699883	0.463317	0.023181	0.956711	2693.19	6.66219	7.53984	2453.48	25.3211	102.092	2587.45	12.8706	55.1959	91.0995		2021-09-09 22:50:38.348	2021-09-09 22:50:38.348	15.539	125.046	60.3087	110.969	Below LOD	1003.9	1933.79	237.636	19.6094	2.22376	6.24392	1.17384	1.62434	476.628	126.435	52.6651	11.4614	1.77055
DO1_2_95	big grain	4.41816	0.0236275	174.14	0.328296	320.923	80.8469	1.89626	0.0927177	0.18417	0.000719811	0.149414	0.469982	13.4042	0.783061	0.527595	0.0260247	0.805941	2689.8	5.42078	6.48121	2731.13	9.86002	109.651	2708.24	5.21856	55.1593	101.537		2021-09-09 22:51:53.951	2021-09-09 22:51:53.951	25.05	Below LOD	45.6835	103.163	Below LOD	884.341	1778.68	213.931	14.158	2.03693	5.13982	1.11706	1.42011	100.052	29.1995	49.3612	1.44862	0.328351
DO1_2_96	big grain	93.6833	0.00475311	31.9559	0.345523	15.0474	339.889	1.98219	0.092879	0.187928	0.00260652	0.161414	1.68433	13.0741	0.77789	0.504409	0.0245537	0.246006	2722.88	21.8108	22.0758	2632.5	10.6877	105.28	2685.11	12.8708	53.777	96.6808		2021-09-09 22:53:01.610	2021-09-09 22:53:01.610	26.055	120.339	54.2313	81.1461	Below LOD	637.901	1355.56	214.937	11.2933	1.59694	9.57853	5.9684	1.11775	Below LOD	19.1422	36.3007	0.483205	0.168168
DO1_2_97	big grain	46.4946	0.0115202	77.1916	0.158973	30.4731	373.508	1.96708	0.0964003	0.184682	0.00107696	0.0749418	1.06274	12.9477	0.753424	0.508434	0.0249527	0.244538	2694.12	8.9044	9.57379	2649.89	5.82953	106.607	2675.62	5.07744	54.5168	98.3585		2021-09-09 22:54:27.258	2021-09-09 22:54:27.258	19.797	Below LOD	46.0684	93.8398	Below LOD	628.984	1567.87	218.095	12.6614	1.88547	2.35437	0.777725	1.33995	Below LOD	20.1757	41.9929	1.48244	0.45483
DO1_2_98	big grain	4.64312	0.0242576	166.366	0.364018	305.536	85.8435	1.97457	0.0958097	0.183822	0.00065326	0.181382	0.355323	12.8402	0.743584	0.506467	0.0246062	0.521516	2686.73	4.67545	5.86033	2641.51	3.25947	105.269	2667.88	3.12426	54.4559	98.3168		2021-09-09 22:55:31.480	2021-09-09 22:55:31.480	25.067	Below LOD	46.7657	84.477	Below LOD	807.03	1437.78	218.562	13.2455	1.69892	3.1481	1.01092	1.20031	99.3259	57.9646	40.2064	2.06843	0.641832
DO1_2_99	big grain	0.58832	0.0348507	242.458	0.394558	2412.17	73.585	1.93121	0.0927781	0.183593	0.000580196	0.202292	0.315024	13.1139	0.762978	0.518145	0.0254079	0.922313	2684.73	3.83863	5.22084	2691.06	11.5943	107.496	2687.52	5.59426	54.4596	100.236		2021-09-09 22:56:49.852	2021-09-09 22:56:49.852	25.015	Below LOD	51.0747	91.343	Below LOD	691.301	1581.81	218.911	13.1873	1.76611	2.66898	0.771777	1.31392	Below LOD	21.73	43.7708	0.620614	0.242491
DO1_2_100	big grain	2.04825	0.0221021	267.53	0.363218	684.669	63.2912	2.04308	0.101129	0.191414	0.00110022	0.19918	0.514542	12.9244	0.757728	0.489882	0.0240705	0.816222	2753.12	8.81236	9.49754	2569.86	14.6524	104.259	2673.49	8.69436	54.9042	93.3436		2021-09-09 22:58:05.537	2021-09-09 22:58:05.537	19.381	299.865	85.1554	158.313	Below LOD	1737.18	2639.48	214.519	18.6221	3.13508	13.1908	2.12924	2.29157	1826.23	236.828	74.9276	50.4386	7.91602
DO1_4_1	big grain	-2.81073	0.0117775	87.9662	0.188015	-505.513	98.5392	1.90757	0.0940146	0.182848	0.000961532	0.0888732	0.894446	13.2115	0.776823	0.524497	0.0260155	0.73548	2677.62	7.91796	8.67044	2718.03	10.4057	109.875	2694.36	6.65265	54.9317	101.509		2021-09-09 23:02:46.594	2021-09-09 23:02:46.594	25.099	Below LOD	45.2247	96.1434	Below LOD	775.376	1653.72	215.228	12.3294	1.8813	3.61573	1.06069	1.29299	Below LOD	28.0653	43.2743	0.485498	0.180502
DO1_4_2	big grain	0.921314	0.0412424	331.07	0.457889	1523.34	99.6416	2.01548	0.100488	0.190853	0.000707228	0.200273	0.304423	13.0462	0.767148	0.496245	0.0247906	0.771503	2748.62	4.95722	6.07625	2597.58	6.33888	106.77	2682.81	4.38081	55.0664	94.5049		2021-09-09 23:04:00.631	2021-09-09 23:04:00.631	20.691	845.608	58.3749	106.573	Below LOD	979.901	1830.31	234.515	8.77669	2.12535	7.20416	1.41905	1.55734	970.744	122.432	51.4653	22.5354	2.58373
DO1_4_3	big grain	1.98637	0.0454817	398.878	0.554532	711.832	107.036	1.91035	0.0924975	0.185964	0.000662967	0.229473	0.287954	13.4156	0.775704	0.523844	0.025467	0.875259	2705.88	4.69025	5.86973	2715.18	12.8193	107.647	2709.06	5.2781	54.4279	100.344		2021-09-09 23:05:20.892	2021-09-09 23:05:20.892	23.379	145.533	62.6526	116.416	Below LOD	1053.63	2012.43	231.859	14.5673	2.31702	9.85111	1.89691	1.62466	581.207	99.298	52.7565	18.152	2.71729
DO1_4_4	big grain	102.403	0.00846487	65.6895	0.318918	13.8618	2427.33	2.00625	0.097453	0.183506	0.00117584	0.1229	0.944447	12.6024	0.732853	0.498684	0.0243698	0.51295	2684.86	9.57931	10.1641	2607.96	9.77142	104.702	2649.9	6.57339	54.8497	97.1359		2021-09-09 23:06:33.109	2021-09-09 23:06:33.109	25.03	Below LOD	48.3915	119.467	Below LOD	709.416	1935.32	220.134	13.8274	2.3604	1.9508	0.74257	1.68391	Below LOD	24.1629	55.0468	1.20352	0.273657
DO1_4_5	big grain	-139.972	0.023194	177.539	0.482168	-10.1381	1136.13	2.08678	0.0993023	0.183632	0.000650964	0.171173	0.255355	12.1101	0.695352	0.479282	0.0229622	0.700735	2685.03	4.67902	5.87246	2524.08	5.45985	99.9499	2612.85	3.19626	53.8188	94.0058		2021-09-09 23:07:47.049	2021-09-09 23:07:47.049	25.019	Below LOD	44.8191	98.2853	Below LOD	691.752	1686.96	229.687	12.3788	1.9847	3.13782	0.95852	1.40872	110.986	22.0571	46.4611	2.12818	0.320104
DO1_4_6	big grain	-65.6711	0.008367	63.3909	0.443679	-21.6501	314.69	2.12741	0.101424	0.182245	0.00115353	0.145517	0.731304	11.8218	0.685901	0.470429	0.022742	0.6448	2671.87	9.8976	10.5184	2485.18	12.1042	99.465	2589.69	7.80098	53.7617	93.0125		2021-09-09 23:09:01.310	2021-09-09 23:09:01.310	25.012	126.307	52.241	89.5496	Below LOD	599.237	1566.39	249.719	17.037	1.80468	7.22668	2.76683	1.293	67.1911	21.7999	41.1497	3.38241	0.567288
DO1_4_7	big grain	5.20022	0.016415	110.071	0.661865	272.557	66.8514	1.96299	0.0945333	0.184277	0.000714666	0.194866	0.458171	12.9298	0.748415	0.509572	0.0246992	0.741901	2690.76	5.34778	6.41548	2654.7	7.50296	105.352	2674.3	4.60674	54.5303	98.6598		2021-09-09 23:10:15.563	2021-09-09 23:10:15.563	25.629	Below LOD	43.1385	87.5834	Below LOD	786.741	1489.05	215.047	10.825	1.76133	2.7786	0.936559	1.31137	Below LOD	14.8635	39.1587	1.45861	0.765623
DO1_4_8	big grain	16.109	0.0161915	121.747	0.715429	88.271	187.298	2.05873	0.107106	0.182339	0.000921139	0.181777	0.351422	12.2042	0.706618	0.485595	0.0233469	0.118942	2673.12	7.61557	8.40915	2551.57	3.29844	101.298	2620.07	4.14132	54.5035	95.4529		2021-09-09 23:11:34.812	2021-09-09 23:11:34.812	20.834	379.07	54.9726	103.576	Below LOD	717.65	1717.8	215.825	9.07251	2.18785	2.80573	0.894616	1.49199	168.043	43.058	48.9149	6.83547	4.18796
DO1_4_9	big grain	-154.026	0.00798974	58.2246	0.362368	-9.22655	506.81	2.03046	0.100419	0.183658	0.00179621	0.101186	1.25851	12.4596	0.734268	0.492646	0.0243853	0.217439	2684.06	15.8765	16.2716	2582.01	9.21509	105.293	2638.97	9.65428	55.7689	96.1978		2021-09-09 23:12:37.566	2021-09-09 23:12:37.566	26.528	Below LOD	36.0229	89.7171	Below LOD	726.931	1499.06	221.418	13.9118	1.77675	1.83378	0.654219	1.3588	Below LOD	22.428	40.5054	0.209321	0.144774
DO1_4_10	big grain	2.55406	0.0144482	107.536	0.408307	555.789	74.2155	2.07162	0.101615	0.183448	0.000886427	0.102734	0.578937	12.1988	0.708796	0.482753	0.0236829	0.323016	2683.13	7.16893	7.99795	2539.22	3.93581	102.959	2619.61	4.27864	54.6479	94.6365		2021-09-09 23:13:54.109	2021-09-09 23:13:54.109	25.008	Below LOD	46.8591	109.784	Below LOD	770.005	1825.68	228.877	12.7695	2.23728	2.20148	0.800109	1.55839	Below LOD	18.2327	49.2437	0.131539	0.0875929
DO1_4_11	big grain	22.9703	0.00630595	51.6251	0.308012	61.7387	181.646	2.11788	0.106818	0.183709	0.0017815	0.0714284	7.26536	11.9604	0.701795	0.472108	0.0231064	0.257633	2683.92	15.4535	15.845	2492.55	11.5993	100.964	2600.32	9.212	54.4162	92.8699		2021-09-09 23:16:04.023	2021-09-09 23:16:04.023	25.014	1432.27	91.3212	96.7202	Below LOD	838.855	1632.29	213.657	8.15265	1.92565	Below LOD	0.7282	1.43727	53.9293	26.557	45.7347	2.33343	0.674303
DO1_4_12	big grain	-40.6028	0.00400511	35.3842	0.613005	-34.9627	84.1802	2.18869	0.11072	0.184273	0.00373487	0.123952	2.5201	11.6586	0.712202	0.45775	0.0226614	0.337827	2689.18	32.002	32.1823	2429.03	19.321	100.503	2577.47	17.664	54.7385	90.3262		2021-09-09 23:17:21.536	2021-09-09 23:17:21.536	21.525	1567.74	110.353	110.813	Below LOD	967.996	1915.95	229.93	8.62502	2.25348	5.43888	2.87714	1.60132	Below LOD	29.1233	51.0976	1.86263	0.435732
DO1_4_13	big grain	9.93649	0.00916731	79.7445	0.382675	142.792	55.824	2.23673	0.103881	0.183769	0.00102135	0.0953579	2.06005	11.3267	0.660256	0.446951	0.0218857	0.68476	2685.86	8.50014	9.21197	2383.2	9.77316	92.59	2549.92	6.48664	54.231	88.7316		2021-09-09 23:18:37.139	2021-09-09 23:18:37.139	25.013	1710.72	107.105	99.779	Below LOD	802.715	1720.81	222.776	8.69737	2.02976	5.417	1.1197	1.43651	227.95	40.6309	44.9058	10.8922	1.4588
DO1_4_14	big grain	-1.97394	0.0308487	251.822	0.899691	-718.696	103.766	2.07382	0.101384	0.183808	0.000633823	0.199501	0.342546	12.2135	0.70565	0.48222	0.0236144	0.322616	2686.63	4.47576	5.71119	2536.92	2.68774	102.674	2620.86	2.66256	54.2467	94.4276		2021-09-09 23:19:51.711	2021-09-09 23:19:51.711	25.012	318.734	57.6917	97.8945	Below LOD	942.505	1691.38	212.819	9.36979	1.97479	2.64191	0.928724	1.46501	256.35	98.049	45.7688	0.907787	0.273925
DO1_4_15	big grain	-6.66977	0.0288169	284.163	0.655133	-211.837	156.911	2.05797	0.103723	0.186455	0.000666619	0.160696	0.33589	12.4994	0.725473	0.486427	0.0237132	0.926911	2710.22	4.69652	5.86702	2554.85	14.037	103.377	2642.1	7.18482	55.4113	94.2672		2021-09-09 23:21:10.356	2021-09-09 23:21:10.356	25.054	625.427	86.697	132.84	Below LOD	1031.42	2262.49	244.414	15.9599	2.65684	19.318	2.85226	2.00649	731.888	81.6247	62.7663	38.7361	4.90678
DO1_4_16	big grain	3.40995	0.0406056	423.7	0.663253	406.157	84.6779	2.21262	0.104784	0.19979	0.000940784	0.202676	0.577885	12.4388	0.723122	0.451787	0.0221066	0.810763	2823.44	6.85731	7.70087	2402.92	13.7131	98.5556	2637.74	6.4273	55.2914	85.1062		2021-09-09 23:22:21.435	2021-09-09 23:22:21.435	19.778	961.697	85.031	123.086	Below LOD	1370.8	2122.32	224.75	12.0921	2.46984	31.2078	4.50849	1.77731	1482.58	153.624	56.0574	58.2645	6.39631
DO1_4_17	big grain	-16.0177	0.00541877	48.278	0.264503	-88.7123	59.9737	2.04226	0.0994858	0.183003	0.00190654	0.0649046	2.62767	12.3537	0.724837	0.489844	0.0237666	0.227345	2677.19	16.9194	17.2889	2569.87	8.63113	102.892	2630.58	9.71722	55.4965	95.9911		2021-09-09 23:23:43.197	2021-09-09 23:23:43.197	25.056	Below LOD	56.483	109.376	Below LOD	1048.97	1931.82	238.595	14.581	2.17277	Below LOD	0.760729	1.59628	Below LOD	25.9896	50.6146	Below LOD	0.0724668
DO1_4_18	big grain	5.40949	0.0198608	173.18	0.456073	261.949	158.237	2.04191	0.0991219	0.184438	0.000819855	0.105109	0.467602	12.4517	0.720769	0.489775	0.0238355	0.337868	2692.11	6.43166	7.34025	2569.68	3.82383	103.093	2638.91	3.91169	54.3646	95.4521		2021-09-09 23:24:57.540	2021-09-09 23:24:57.540	25.006	358.61	63.9607	104.203	Below LOD	791.075	1789.07	224.084	10.8057	2.1176	2.21259	1.04426	1.47091	Below LOD	23.8169	47.865	0.47785	0.214831
DO1_4_19	big grain	-2.47151	0.0219482	179.035	0.525758	-573.858	88.4116	1.95348	0.0968785	0.183986	0.000729872	0.139879	1.61404	12.9855	0.759624	0.51196	0.0255241	0.609642	2688.14	5.53325	6.5747	2664.96	4.58079	108.723	2678.43	3.93499	55.1398	99.1375		2021-09-09 23:26:16.504	2021-09-09 23:26:16.504	25.04	Below LOD	46.8922	102.684	Below LOD	868.328	1754.11	219.694	14.6345	2.07442	1.81537	0.95323	1.45587	52.041	25.1821	47.07	1.00281	0.233028
DO1_4_20	big grain	-24.8668	0.0049023	44.4851	1.17485	-57.0626	128.367	1.92089	0.094233	0.184019	0.00225667	0.310915	0.836601	13.2204	0.781389	0.521339	0.0254947	0.410591	2685.41	19.9796	20.2916	2704.32	17.2341	108.054	2693.8	12.1565	55.4911	100.704		2021-09-09 23:27:35.433	2021-09-09 23:27:35.433	25.045	1402.74	74.3512	117.688	Below LOD	1132.08	1988.92	219.368	9.20758	2.37581	3.7221	1.42456	1.7652	Below LOD	31.6668	55.0352	1.50311	0.454299
DO1_4_21	big grain	0.0440017	0.0503319	636.439	0.843993	32554.3	105.269	1.90862	0.0954979	0.177638	0.00089841	0.298473	0.61091	12.8861	0.77837	0.525852	0.0268501	0.966646	2629.89	7.60379	8.39419	2722.54	34.5489	112.981	2669.36	16.2483	56.1994	103.523		2021-09-09 23:31:06.327	2021-09-09 23:31:06.327	16.437	189.676	120.808	173.626	Below LOD	1655.11	3050.1	254.962	34.5245	3.58638	12.977	3.52243	2.48438	908.972	168.939	79.8188	83.1971	15.3939
DO1_4_22	big grain	-25.5981	0.00420259	43.877	0.406102	-55.4908	136.289	1.93897	0.0944183	0.183377	0.00238597	0.138438	1.80663	13.0162	0.769196	0.516083	0.0251482	0.249598	2679.26	21.187	21.4802	2682.3	11.7514	106.896	2679.29	11.5956	55.5696	100.113		2021-09-09 23:32:27.532	2021-09-09 23:32:27.532	25.03	Below LOD	55.9685	131.036	Below LOD	1121.96	2286.33	215.711	17.5334	2.65723	Below LOD	0.921879	1.87953	Below LOD	29.8066	60.4863	0.389762	0.178778
DO1_4_23	big grain	24.9623	0.00523087	49.7192	0.199069	56.8238	120.682	2.01814	0.0974203	0.184133	0.00187885	0.0680503	2.64401	12.5831	0.737427	0.49567	0.0241633	0.0486005	2687.48	16.4759	16.8515	2595.04	8.02589	103.965	2648.05	8.85742	55.2508	96.5605		2021-09-09 23:33:37.328	2021-09-09 23:33:37.328	25.047	256.02	66.3286	115.529	Below LOD	879.142	1916.83	221.046	11.6477	2.36487	Below LOD	0.997624	2.14509	Below LOD	28.5987	56.1559	Below LOD	0.105086
DO1_4_25	big grain	-47.6641	0.0115957	105.763	0.296486	-29.7756	202.014	2.02783	0.0994843	0.183609	0.00108394	0.122756	0.690578	12.4922	0.729186	0.493389	0.0242328	0.572367	2684.32	9.05812	9.72074	2585.14	9.93366	104.571	2641.69	6.2609	54.8079	96.3054		2021-09-09 23:36:01.637	2021-09-09 23:36:01.637	25.005	Below LOD	43.049	107.084	Below LOD	880.822	1827.29	226.357	13.2929	2.15761	2.00813	0.727622	1.57569	128.298	34.3735	51.9445	1.43118	0.505019
DO1_4_26	big grain	28.9535	0.009162	101.65	0.169939	49.0391	244.316	2.22289	0.109063	0.183356	0.00127054	0.0844288	1.32199	11.3973	0.671274	0.450878	0.0224174	0.796461	2681.75	10.9058	11.4677	2398.45	19.7833	99.3544	2555.07	9.90715	54.3565	89.4358		2021-09-09 23:37:20.562	2021-09-09 23:37:20.562	25.11	165.807	59.3458	122.797	Below LOD	1051.7	2082.47	258.582	15.9632	2.52935	7.61008	1.272	1.80694	478.03	89.0108	58.7057	11.1275	1.37331
DO1_4_27	big grain	-38.0524	0.00331437	28.0689	0.336894	-37.318	125.987	1.97621	0.0970982	0.183822	0.00308823	0.15403	1.77117	12.8519	0.772672	0.506604	0.0248816	0.203491	2685.44	26.3397	26.5565	2641.7	15.6116	106.442	2666.23	15.4728	56.5599	98.3709		2021-09-09 23:38:30.398	2021-09-09 23:38:30.398	23.616	359.726	60.3441	110.699	Below LOD	1029.42	1923.69	227.117	9.40027	2.27414	2.09278	0.870813	1.69183	Below LOD	24.1966	51.9989	0.385971	0.212044
DO1_4_28	big grain	0.640294	0.0389328	305.268	0.383275	2216.11	97.1069	1.97067	0.0956124	0.183534	0.000577516	0.185384	1.54187	12.8482	0.744241	0.507491	0.0246925	0.570605	2684.2	3.80809	5.19918	2645.87	4.46112	105.537	2668.96	2.94621	52.0518	98.5722		2021-09-09 23:39:35.723	2021-09-09 23:39:35.723	25.014	Below LOD	56.3234	120.521	Below LOD	945.347	2042.42	213.711	11.2853	2.42931	2.21329	0.764297	1.75849	Below LOD	25.7476	51.1435	1.74376	0.412282
DO1_4_29	big grain	14.0679	0.0234093	209.278	0.189278	100.897	312.725	2.03244	0.0998947	0.183369	0.000721088	0.0939675	1.34905	12.4415	0.722462	0.492175	0.0240137	0.740727	2682.59	5.44489	6.49266	2579.97	7.75892	103.857	2639.57	4.62203	54.4936	96.1745		2021-09-09 23:40:49.902	2021-09-09 23:40:49.902	25.032	Below LOD	51.5348	102.73	Below LOD	955.955	1846.28	214.737	10.4781	2.09094	2.61349	0.933618	1.49515	Below LOD	30.5876	45.9661	3.03252	1.04175
DO1_4_30	big grain	44.5724	0.00440903	34.4527	0.289066	31.7434	270.194	1.92276	0.0932756	0.185992	0.00259309	0.146265	1.65262	13.3229	0.794972	0.520553	0.0255352	0.345613	2702.13	22.5997	22.8713	2701.18	13.7704	108.018	2700.64	13.723	55.8655	99.9649		2021-09-09 23:42:04.129	2021-09-09 23:42:04.129	25.013	Below LOD	58.3154	97.8093	Below LOD	827.143	1688.29	217.394	12.7738	2.03682	3.23285	1.20321	1.41164	74.8851	31.8532	45.2341	0.244087	0.138522
DO1_4_31	big grain	17.2375	0.0085865	77.325	0.202907	82.3798	286.529	2.05864	0.099658	0.18328	0.00125532	0.0757487	1.18958	12.2756	0.716472	0.486029	0.0237684	0.519333	2682.84	10.3224	10.8678	2553.28	10.3518	102.923	2625.13	7.08443	54.8575	95.1708		2021-09-09 23:44:32.661	2021-09-09 23:44:32.661	25.017	1482.65	71.4036	107.863	Below LOD	744.968	1876.25	215.03	6.64532	2.20534	Below LOD	0.783045	1.55419	Below LOD	24.9097	49.4421	1.09755	0.293831
DO1_4_32	big grain	-3.65836	0.0307124	238.358	0.72556	-387.347	59.9416	1.9569	0.0987507	0.184641	0.000666313	0.304278	0.300772	12.9668	0.754503	0.511227	0.0249712	0.853974	2694.07	4.79361	5.95679	2661.72	9.14625	107.077	2676.88	5.57384	55.2812	98.7989		2021-09-09 23:45:42.154	2021-09-09 23:45:42.154	25.019	Below LOD	46.1123	100.978	Below LOD	941.9	1767.56	221.232	11.2677	2.05436	4.04877	1.11289	1.48801	142.685	46.5541	47.1366	2.75375	0.92602
DO1_4_33	big grain	3.07206	0.0221556	407.821	0.568478	459.631	55.5685	2.42337	0.119039	0.186874	0.00120196	0.220595	0.513393	10.6328	0.626924	0.413049	0.0206393	0.860825	2713.84	9.98698	10.5919	2228.57	21.5607	93.9083	2491.16	10.6093	54.3921	82.1189		2021-09-09 23:47:13.370	2021-09-09 23:47:13.370	8.193	1021.38	153.974	272.138	Below LOD	2483.9	4779.55	270.358	29.7307	5.67018	19.2845	6.37388	4.19834	2659.2	413.078	126.211	95.5	9.38673
DO1_4_34	big grain	-4.02575	0.0198633	153.727	0.465115	-352.27	233.113	1.95656	0.0952465	0.184112	0.000580538	0.15699	0.33984	12.9573	0.750347	0.511147	0.024891	0.579054	2689.4	3.82973	5.21887	2661.49	4.27091	106.174	2676.46	2.80177	54.5842	98.9622		2021-09-09 23:48:06.194	2021-09-09 23:48:06.194	25.177	Below LOD	32.1753	94.5914	Below LOD	827.515	1626.69	215.926	9.91392	1.96808	2.02137	0.768661	1.34852	Below LOD	18.8569	43.8571	0.196795	0.113533
DO1_4_35	big grain	1.61567	0.0323148	258.359	0.840427	877.807	82.3787	1.95991	0.0963448	0.183995	0.000593668	0.259332	0.77284	12.9366	0.749861	0.510288	0.0248706	0.692569	2688.34	3.98376	5.32751	2657.81	4.92074	106.305	2674.94	3.00403	54.7746	98.8646		2021-09-09 23:49:20.583	2021-09-09 23:49:20.583	25.004	Below LOD	59.2726	98.7076	Below LOD	871.135	1677.04	217.865	12.019	2.01017	2.26723	0.844204	1.42108	Below LOD	26.8276	46.5459	0.873301	0.279323
DO1_4_36	big grain	150.232	0.017154	142.091	0.555587	9.44232	1188.81	2.03301	0.0989939	0.183875	0.000737721	0.136407	0.430148	12.4575	0.722357	0.491924	0.0239619	0.341633	2687.13	5.61524	6.64139	2578.97	4.14198	103.528	2639.4	3.29389	54.5211	95.9747		2021-09-09 23:50:34.787	2021-09-09 23:50:34.787	25.046	1810.02	78.7583	97.5597	Below LOD	804.478	1678.69	219.976	6.78319	2.00293	4.05605	1.12793	1.51485	121.234	27.2727	44.3775	3.92725	0.642405
DO1_4_37	big grain	17.6657	0.0236001	202.116	0.523672	80.2948	226.147	1.97768	0.0953585	0.183908	0.000727773	0.135917	0.32424	12.8017	0.741397	0.505678	0.0245394	0.319902	2687.44	5.51433	6.55866	2638.12	3.73962	104.948	2665.04	3.25563	54.6204	98.165		2021-09-09 23:51:49.075	2021-09-09 23:51:49.075	25.008	Below LOD	45.25	103.738	Below LOD	916.681	1789.6	218.633	12.7999	2.17271	2.16182	0.906317	1.47398	Below LOD	22.1945	48.9013	Below LOD	0.0910709
DO1_4_38	big grain	15.8023	0.0396266	337.059	0.660225	89.7731	239.769	1.92811	0.0949888	0.183823	0.000562493	0.165856	0.189154	13.1253	0.759612	0.518759	0.0252335	0.834698	2686.82	3.60675	5.05103	2693.83	6.79432	107.327	2688.54	3.73776	54.8522	100.261		2021-09-09 23:52:58.458	2021-09-09 23:52:58.458	25.045	Below LOD	44.4351	107.761	Below LOD	923.564	1903.89	217.559	14.0627	2.1871	4.78824	1.18555	1.53549	198.894	88.2224	47.5934	7.01219	2.23571
DO1_4_39	big grain	4.47976	0.0668542	542.418	0.94138	316.767	176.385	1.89611	0.0915557	0.183627	0.000520308	0.217841	0.211894	13.3323	0.771091	0.527552	0.0256516	0.912018	2685.09	3.06494	4.68186	2731.02	7.92023	108.119	2703.28	4.12593	54.5292	101.711		2021-09-09 23:54:08.319	2021-09-09 23:54:08.319	25.044	Below LOD	56.3004	99.8215	Below LOD	931.82	1730.84	205.197	13.886	2.06341	2.9343	0.797038	1.46622	49.1843	35.8499	47.3384	1.18483	0.381065
DO1_4_40	big grain	11.4384	0.0053721	45.3594	0.367842	123.847	55.6939	2.02857	0.0991848	0.18493	0.0017135	0.0742668	2.20294	12.5462	0.733901	0.493126	0.024079	0.131704	2695.05	14.8639	15.2779	2584.07	8.15436	103.97	2645.43	8.14483	54.7358	95.882		2021-09-09 23:55:27.098	2021-09-09 23:55:27.098	25.016	560.32	75.8138	95.7025	Below LOD	719.184	1642.42	212.764	8.40765	1.99066	2.64851	0.925595	1.40277	Below LOD	25.6974	44.79	0.705624	0.261841
DO1_4_41	big grain	8.64626	0.054136	1047.89	0.847951	167.359	202.353	2.51373	0.123208	0.171288	0.000634684	0.216027	0.124717	9.41075	0.557999	0.39896	0.020003	0.973509	2569.34	5.05961	6.20123	2163.48	22.2109	91.8122	2377.49	11.8119	53.7479	84.2038		2021-09-10 00:03:22.804	2021-09-10 00:03:22.804	21.382	321.59	121.763	212.893	Below LOD	1667.54	3716.48	243.075	16.7264	4.51675	72.3557	6.00089	2.99235	2471.26	240.198	101.797	82.6741	7.31457
DO1_4_42	big grain	44.3374	0.0189165	151.67	0.464554	32.0126	371.005	2.01992	0.09881	0.183498	0.000667833	0.108976	0.528574	12.5129	0.725258	0.495121	0.0241194	0.591769	2683.8	4.85119	6.00097	2592.76	4.48488	104.062	2643.56	3.42803	54.4747	96.6077		2021-09-10 00:04:34.175	2021-09-10 00:04:34.175	25.037	103.698	41.0165	93.3878	Below LOD	888.205	1634.12	219.5	13.6978	1.93036	2.52447	0.875487	1.37357	56.0644	23.34	42.8897	3.23311	0.544764
DO1_4_43	big grain	-3.56691	0.0523795	399.51	1.39449	-396.446	128.025	1.94197	0.0930419	0.18582	0.000673923	0.342521	0.395427	13.2071	0.772508	0.515653	0.0253793	0.939337	2704.58	4.80696	5.95858	2680.19	16.9497	107.439	2693.79	8.18851	54.71	99.0982		2021-09-10 00:05:48.599	2021-09-10 00:05:48.599	25.038	165.89	66.6333	95.1916	Below LOD	754.725	1682.07	214.232	12.8961	1.95623	6.65869	1.40451	1.51028	314.441	93.0774	44.1664	15.0128	4.04896
DO1_4_44	big grain	-2.76604	0.038506	300.22	0.780193	-512.845	87.0745	1.97376	0.0959693	0.183864	0.000524211	0.199265	0.151653	12.8427	0.743828	0.506683	0.0246784	0.741678	2687.22	3.10699	4.70842	2642.43	3.93427	105.556	2668.09	2.7815	54.4827	98.3331		2021-09-10 00:07:02.803	2021-09-10 00:07:02.803	23.953	Below LOD	48.8505	96.6349	Below LOD	923.288	1736.51	222.468	11.7289	1.97163	Below LOD	0.798859	1.37786	168.943	56.3382	43.2803	9.83738	8.55555
DO1_4_45	big grain	1.34326	0.0178189	143.073	0.465675	1054.75	78.7016	1.99155	0.0977887	0.184396	0.000787954	0.131025	2.79069	12.7715	0.741123	0.502155	0.0244623	0.719437	2694.31	6.97422	8.06054	2623.03	3.58511	105.111	2662.73	4.37835	54.6011	97.3545		2021-09-10 00:08:16.793	2021-09-10 00:08:16.793	25.009	Below LOD	39.9993	95.0996	Below LOD	758.281	1746.03	222.445	13.644	2.01105	2.29782	0.901676	2.04983	586.021	59.6163	47.4676	0.498542	0.209765
DO1_4_46	big grain	-105.625	0.00492085	42.6997	0.301412	-13.4194	228.662	2.10967	0.104822	0.184589	0.00179773	0.0975584	1.96308	12.0669	0.707587	0.47444	0.0232683	0.343243	2691.73	15.9568	16.3574	2502.7	12.8507	101.913	2608.66	9.12718	55.3847	92.9773		2021-09-10 00:09:30.767	2021-09-10 00:09:30.767	25.027	Below LOD	49.7619	130.031	Below LOD	834.241	2255.88	220.884	11.9065	2.71552	2.44561	0.92796	1.81551	Below LOD	27.1579	56.2579	2.66108	0.538809
DO1_4_47	big grain	0.00123422	0.0410967	370.042	0.452242	1.14796e+06	99.4428	2.09781	0.101697	0.18464	0.000562109	0.145531	0.178067	12.1433	0.706326	0.47703	0.0233483	0.929219	2694.15	3.56515	5.01702	2514.08	11.5939	101.734	2615.19	5.48875	54.3035	93.316		2021-09-10 00:10:40.497	2021-09-10 00:10:40.497	25.014	409.21	56.8306	104.441	Below LOD	811.811	1832.56	228.745	11.3974	2.19442	10.948	1.80151	1.55431	430.141	58.5827	48.0493	24.1776	3.47555
DO1_4_48	big grain	-60.7173	0.0140884	112.776	0.522289	-23.3382	1001.31	1.97842	0.0965315	0.18459	0.000951046	0.171277	0.359379	12.8666	0.747032	0.5055	0.0246097	0.368595	2693.31	7.76957	8.54315	2637.36	4.30719	105.412	2669.67	4.75508	54.8356	97.9224		2021-09-10 00:11:54.665	2021-09-10 00:11:54.665	25.045	Below LOD	45.5626	95.932	Below LOD	786.926	1658.01	226.218	12.4494	2.00403	1.68221	0.872713	1.36491	Below LOD	24.3347	45.8953	Below LOD	0.0943165
DO1_4_49	big grain	11.3839	0.0062044	45.3261	0.707761	123.594	82.2164	1.79301	0.0879317	0.189383	0.00176461	0.305314	0.495101	14.5747	0.856105	0.558054	0.0272947	0.480125	2734.39	14.8469	15.2556	2858.34	12.0639	112.963	2786.86	9.76099	55.7645	104.533		2021-09-10 00:13:13.461	2021-09-10 00:13:13.461	23.343	137.65	55.8838	103.531	Below LOD	826.761	1765.68	220.276	11.3653	2.13664	3.64576	0.915621	1.58031	83.6828	32.6259	47.3818	4.25333	1.04878
DO1_4_50	big grain	26.592	0.0123425	103.616	0.261111	53.4309	226.556	2.06517	0.101376	0.182863	0.000977497	0.109344	0.647449	12.214	0.70972	0.484307	0.0236169	0.412865	2677.73	8.05669	8.79379	2545.94	5.765	102.675	2620.69	4.99187	54.2458	95.0782		2021-09-10 00:14:27.435	2021-09-10 00:14:27.435	25.003	Below LOD	49.6406	101.682	Below LOD	814.94	1763.01	233.891	14.7947	2.06088	2.51933	0.982198	1.5389	125.554	37.3783	47.5123	2.90847	0.480167
DO1_4_51	big grain	5.57342	0.02623	209.245	0.400701	254.318	471.512	1.95249	0.0942896	0.18438	0.000666638	0.168564	0.250652	13.0308	0.755635	0.512233	0.025002	0.578178	2691.74	4.82174	5.98557	2666.11	5.19231	106.383	2681.76	3.33161	54.5632	99.0478		2021-09-10 00:16:46.467	2021-09-10 00:16:46.467	25.007	Below LOD	39.1422	95.1658	Below LOD	593.869	1662.33	228.809	12.8936	2.00525	2.94674	1.01149	1.53109	Below LOD	26.6102	44.8172	0.996506	0.384557
DO1_4_52	big grain	-2.6786	0.00685969	55.8174	0.318757	-529.362	98.9194	2.01672	0.0989861	0.184303	0.00163746	0.143754	1.14227	12.5787	0.733781	0.495957	0.024164	-0.0205922	2689.57	14.3495	14.7858	2596.33	6.35133	104.249	2649.21	7.50035	57.6463	96.533		2021-09-10 00:18:05.193	2021-09-10 00:18:05.193	25.036	Below LOD	41.7224	101.917	Below LOD	761.943	1732.52	222.447	10.6445	2.13443	10.435	6.5988	1.55829	Below LOD	24.1701	47.7824	0.421571	0.214115
DO1_4_53	big grain	10.3956	0.00828965	67.6506	0.119756	136.377	109.006	1.99643	0.097119	0.184372	0.00148845	0.0529118	1.71463	12.7338	0.742237	0.500979	0.0244136	-0.0398117	2690.5	12.84	13.3174	2617.94	5.80427	104.815	2659.63	6.76403	54.6506	97.3032		2021-09-10 00:19:14.954	2021-09-10 00:19:14.954	25.027	Below LOD	50.9872	133.008	Below LOD	860.566	2265.6	222.946	11.5154	2.64549	Below LOD	0.746611	1.86662	Below LOD	20.4816	64.4995	0.151765	0.0995954
DO1_4_54	big grain	-7.7987	0.0421637	346.482	0.397972	-181.428	192.938	1.97198	0.0977273	0.185533	0.000664866	0.192823	1.89501	12.9796	0.755566	0.507466	0.0248956	0.87211	2702.04	4.73942	5.91225	2645.54	12.0456	106.633	2677.83	5.52354	55.0422	97.9093		2021-09-10 00:20:33.160	2021-09-10 00:20:33.160	24.66	Below LOD	55.6269	137.983	Below LOD	1002.51	2402.2	214.071	11.8605	2.84695	10.294	2.0979	1.91107	214.803	77.0451	65.5743	14.4826	5.0896
DO1_4_55	big grain	-2.00682	0.0164822	136.69	0.316771	-706.497	119.746	1.96079	0.0955219	0.184209	0.000778419	0.143286	0.359143	12.9469	0.75057	0.510025	0.0248165	0.248814	2690.12	6.02303	6.98753	2656.72	3.37758	105.964	2675.67	3.4707	54.748	98.7583		2021-09-10 00:21:54.231	2021-09-10 00:21:54.231	22.879	Below LOD	48.5565	109.294	Below LOD	907.276	1967.97	212.897	8.95037	2.29764	1.88239	0.928918	1.66515	Below LOD	22.5789	52.4842	0.681678	0.245503
DO1_4_56	big grain	2.0724	0.00993251	82.0734	0.31049	683.796	80.1147	1.98316	0.0958485	0.184585	0.00111746	0.135028	0.761753	12.828	0.745379	0.504318	0.024504	0.267068	2693.04	9.33405	9.97981	2632.28	5.36399	104.906	2666.76	5.44438	54.6064	97.7436		2021-09-10 00:23:10.414	2021-09-10 00:23:10.414	25.048	Below LOD	60.9523	103.409	Below LOD	891.824	1787.13	222.04	11.5685	2.12352	2.45872	0.952564	1.56783	Below LOD	22.4937	48.1503	Below LOD	0.120484
DO1_4_57	big grain	-2.61368	0.0487044	476.96	1.03054	-541.733	180.157	1.75142	0.0858032	0.185068	0.000666746	0.49102	1.4142	14.5999	0.860948	0.572438	0.0284626	0.971199	2697.89	4.7743	5.93827	2916.71	24.6783	116.33	2788.11	11.0383	55.6969	108.111		2021-09-10 00:24:23.578	2021-09-10 00:24:23.578	24.969	Below LOD	81.0021	130.808	Below LOD	1553.62	2279.75	197.58	12.7885	2.75434	55.6959	17.635	2.08261	267.987	63.4631	61.2978	7.94678	1.17651
DO1_4_58	big grain	-14.1593	0.0269195	235.719	0.233572	-100.113	352.246	1.94147	0.0977731	0.184329	0.000675439	0.0996873	0.639341	13.0795	0.75617	0.514966	0.0249252	0.374307	2691.28	4.9046	6.04545	2677.77	3.7796	105.961	2685.31	2.95115	54.5046	99.4981		2021-09-10 00:25:43.333	2021-09-10 00:25:43.333	25.036	Below LOD	58.6758	109.457	Below LOD	1097.88	1871.71	225.856	12.6225	2.26917	Below LOD	0.853638	1.75185	Below LOD	23.9562	53.9342	Below LOD	0.14849
DO1_4_59	big grain	-2.95741	0.0208841	187.878	0.27021	-479.364	79.8004	1.96182	0.0958119	0.184264	0.000671766	0.112298	0.483268	12.9421	0.750956	0.509779	0.0248892	0.600122	2690.69	4.87728	6.02781	2655.65	4.36371	106.274	2675.3	3.47225	54.4761	98.6979		2021-09-10 00:26:57.394	2021-09-10 00:26:57.394	25.009	Below LOD	66.1251	114.191	Below LOD	666.892	1964.73	215.267	10.5927	2.39614	2.79466	0.993754	1.831	141.828	52.9176	52.7521	3.38763	0.739319
DO1_4_60	big grain	3.67133	0.0243704	205.751	0.338243	386.177	58.6788	1.96973	0.0956689	0.18412	0.000687252	0.130157	0.311239	12.8837	0.745323	0.50772	0.0245229	0.402902	2689.38	5.05426	6.17205	2646.86	3.78194	104.946	2671.06	3.27236	54.4029	98.4189		2021-09-10 00:28:11.805	2021-09-10 00:28:11.805	25.052	Below LOD	49.1099	99.9961	Below LOD	868.72	1827.29	220.206	11.949	2.11395	2.74001	0.855424	1.4945	65.6907	32.7742	45.2764	4.34696	1.86953
DO1_4_61	big grain	48.6398	0.0041787	36.8263	0.371757	29.1588	223.077	1.9197	0.095274	0.18469	0.00202765	0.126072	2.43906	13.2516	0.779686	0.521298	0.0254677	0.272001	2692.1	17.7963	18.1451	2704.41	12.2887	108.188	2696.5	10.3309	55.6737	100.457		2021-09-10 00:31:45.101	2021-09-10 00:31:45.101	25.019	Below LOD	62.5119	110.912	Below LOD	1227.09	1929.91	218.577	12.0012	2.32262	2.15637	0.966896	1.68431	Below LOD	22.522	52.8829	Below LOD	0.0940333
DO1_4_62	big grain	-19.4769	0.0244555	204.676	0.772907	-72.6647	269.099	1.97303	0.0619198	0.184712	0.000881838	0.239376	0.632394	12.9162	0.750454	0.507714	0.0247509	0.860254	2694.49	6.95485	7.78227	2646.72	8.84477	104.199	2673.18	5.6509	53.098	98.2269		2021-09-10 00:32:59.315	2021-09-10 00:32:59.315	25.012	217.072	59.7505	100.605	Below LOD	823.714	1785.95	220.165	8.88809	2.09221	14.4191	2.96155	1.56833	Below LOD	25.7268	46.5468	0.474735	0.23115
DO1_4_63	big grain	4.25246	0.0120966	103.928	0.179678	333.838	63.0174	1.98682	0.092345	0.183264	0.000974455	0.0540088	1.3777	12.6944	0.736989	0.503187	0.024512	0.303985	2682.65	8.4305	9.21123	2627.42	5.60349	105.123	2657	4.63132	54.8492	97.9412		2021-09-10 00:34:18.059	2021-09-10 00:34:18.059	25.011	Below LOD	58.0073	134.724	Below LOD	1086.62	2353.91	210.179	13.8323	2.73457	Below LOD	0.788805	1.96707	Below LOD	23.1462	64.526	Below LOD	0.157793
DO1_4_64	big grain	11.0273	0.0264094	280.786	0.62078	128.635	267.436	1.89129	0.0937815	0.183887	0.00065202	0.166884	0.238657	13.3979	0.778691	0.528978	0.0258716	0.844351	2687.32	4.66355	5.8525	2736.97	9.7089	109.324	2707.86	4.654	55.2004	101.848		2021-09-10 00:35:36.798	2021-09-10 00:35:36.798	25.022	845.762	86.8227	133.183	Below LOD	1155.57	2312.22	205.957	8.11081	2.80835	4.51413	1.26187	2.05716	427.545	61.8042	64.5516	6.07671	0.935555
DO1_4_65	big grain	-3.4758	0.0141239	126.544	0.623102	-407.793	77.4165	1.96655	0.0951886	0.184152	0.000800732	0.169897	0.310477	12.9046	0.747525	0.508594	0.0246942	0.41926	2690.64	6.56672	7.54649	2650.56	5.98364	105.461	2672.53	4.00515	54.5797	98.5104		2021-09-10 00:36:56.170	2021-09-10 00:36:56.170	25.06	Below LOD	63.9518	107.457	Below LOD	1248.91	1971.88	216.816	13.7823	2.28634	2.20016	1.03117	1.57717	Below LOD	29.086	51.5221	Below LOD	0.129748
DO1_4_66	big grain	0.442067	0.0565872	801.567	1.00741	3254.58	74.9123	1.94266	0.103324	0.174786	0.000621611	0.281233	0.125079	12.5452	0.779298	0.520554	0.0276443	0.992624	2603.81	4.93729	6.18496	2697.32	47.0647	117.079	2640.62	21.3325	58.311	103.591		2021-09-10 00:38:13.402	2021-09-10 00:38:13.402	26.228	Below LOD	119.688	180.292	Below LOD	2029.44	3165.28	188.865	16.1064	3.74107	7.61776	1.89294	2.59855	678.668	110.905	83.4821	10.4289	2.30207
DO1_4_67	big grain	0.518904	0.0321402	329.399	1.19763	2729.73	74.4698	1.82254	0.0887529	0.184719	0.000568538	0.291466	1.11974	13.9776	0.812716	0.549078	0.0268826	0.91274	2694.85	3.64051	5.07002	2821.04	12.6164	111.753	2747.84	5.49889	54.956	104.683		2021-09-10 00:39:29.776	2021-09-10 00:39:29.776	25.006	880.435	81.0408	128.633	Below LOD	1355.37	2278.61	192.389	9.81244	2.78799	13.73	2.86487	1.9201	254.074	69.8408	58.3429	23.09	5.0678
DO1_4_68	big grain	8.40214	0.0216513	205.206	1.01183	168.872	146.632	1.92677	0.093472	0.183805	0.000652291	0.245563	0.537171	13.1376	0.761596	0.51906	0.0252702	0.640562	2686.58	4.67084	5.85905	2695.15	4.72748	107.171	2689.43	3.64939	54.6846	100.319		2021-09-10 00:40:48.609	2021-09-10 00:40:48.609	25.033	Below LOD	69.9995	116.184	Below LOD	1132.97	1956.07	205.369	14.9898	2.39135	1.91607	0.996694	1.8306	Below LOD	32.3353	55.5233	0.578375	0.255182
DO1_4_69	big grain	-2.09576	0.0323059	338.048	0.957762	-674.848	119.423	1.87625	0.0905555	0.18581	0.000746215	0.202752	0.259157	13.648	0.791447	0.533068	0.0259136	0.615054	2704.43	5.61303	6.63565	2754.3	6.08176	108.821	2725.41	4.08097	54.778	101.844		2021-09-10 00:42:03.109	2021-09-10 00:42:03.109	25.006	2079.14	127.018	136.191	Below LOD	1262.62	2347.8	200.356	7.81286	2.84517	4.10002	1.28981	2.08847	135.847	38.8132	61.6872	12.7106	1.66517
DO1_4_70	big grain	1343.05	0.00462499	46.4438	0.343005	1.05728	5209.96	1.92204	0.0939329	0.183594	0.00237016	0.0849673	2.51886	13.167	0.77877	0.520662	0.0255407	0.154338	2681.26	20.9321	21.2264	2701.71	12.3369	108.179	2690.15	11.5442	55.67	100.763		2021-09-10 00:43:22.165	2021-09-10 00:43:22.165	25.029	Below LOD	71.7363	122.749	Below LOD	945.16	2123.44	216.686	16.0159	2.56814	Below LOD	1.13029	1.72972	Below LOD	29.5946	57.3171	0.230514	0.149098
DO1_4_71	big grain	8.5717	0.00626538	57.1311	0.491276	165.75	105.797	1.98331	0.101139	0.18329	0.00148387	0.101526	1.49876	12.7309	0.744297	0.504043	0.0245858	0.225922	2680.76	12.8668	13.3424	2631.03	7.91267	105.202	2660.46	7.45647	52.6096	98.1451		2021-09-10 00:45:55.387	2021-09-10 00:45:55.387	25.074	1055.83	84.6826	113.387	Below LOD	992.582	1945.58	211.333	6.37178	2.40028	2.64718	0.923767	1.65485	Below LOD	30.5854	49.5941	0.958304	0.288025
DO1_4_72	big grain	-46.8514	0.00559153	52.8606	0.335259	-30.3417	424.989	1.86543	0.0927795	0.182681	0.00169412	0.0938167	2.07482	13.5065	0.793307	0.536389	0.0263762	0.362991	2677.26	14.3194	14.7175	2768.08	11.3293	110.871	2714.8	9.09731	55.8703	103.392		2021-09-10 00:47:05.341	2021-09-10 00:47:05.341	25.091	Below LOD	48.7022	119.506	Below LOD	736.204	2124.71	216.593	15.263	2.5128	Below LOD	0.813417	1.79844	Below LOD	30.3387	54.376	0.455144	0.203451
DO1_4_73	big grain	2.93085	0.0190349	181.968	0.746238	483.348	51.4175	1.93589	0.0939595	0.184768	0.000873204	0.185262	0.436014	13.1607	0.763071	0.516603	0.0251435	0.486918	2695	6.94397	7.7905	2684.73	4.23949	106.82	2691.01	4.51689	54.5809	99.6187		2021-09-10 00:48:19.506	2021-09-10 00:48:19.506	25.03	Below LOD	71.5033	122.632	Below LOD	1003.97	2197.9	203.593	10.4926	2.58867	4.77601	1.04473	1.78946	Below LOD	30.5342	57.7857	3.34357	0.526235
DO1_4_74	big grain	-5.04284	0.0330736	306.254	0.658042	-280.95	86.6552	1.90847	0.0902025	0.184664	0.000603281	0.142072	0.267055	13.3496	0.770576	0.524263	0.0253808	0.90253	2694.33	4.07154	5.39323	2717.03	10.7546	106.883	2704.37	5.3375	53.9675	100.842		2021-09-10 00:49:29.201	2021-09-10 00:49:29.201	25.01	1318.29	104.041	112.562	Below LOD	981.973	2024.2	195.883	8.43408	2.41751	5.21686	1.35198	1.76824	446.228	137.194	52.7674	3.45624	0.694132
DO1_4_75	big grain	18.0886	0.00789013	77.9736	0.470868	78.2589	74.5385	2.07247	0.102273	0.185106	0.00138844	0.108872	1.30949	12.335	0.72109	0.482713	0.0235819	0.322804	2697.26	11.8992	12.4163	2538.94	8.70082	102.682	2629.62	7.31797	54.9985	94.1302		2021-09-10 00:50:48.230	2021-09-10 00:50:48.230	25.079	1408.78	112.465	126.327	Below LOD	928.364	2260.56	211.995	8.05459	2.62175	6.06733	2.14482	1.84574	Below LOD	35.1746	59.7795	3.05034	0.81614
DO1_4_76	big grain	33.1716	0.00779284	72.6749	0.185251	42.8088	199.86	2.02166	0.0990844	0.18333	0.00153958	0.0505682	2.28362	12.5065	0.731504	0.494767	0.0242533	0.140647	2681	13.5046	13.9667	2591.18	6.95589	104.585	2642.57	7.48125	55.2306	96.6498		2021-09-10 00:51:58.062	2021-09-10 00:51:58.062	25.015	257.38	70.3838	107.973	Below LOD	985.913	1940.98	206.014	9.49649	2.24366	Below LOD	0.825585	1.65959	Below LOD	26.3404	50.8819	0.742926	0.220428
DO1_4_77	big grain	-11.7557	0.0047672	37.8161	0.457985	-120.619	61.8654	1.78715	0.089034	0.184852	0.00210252	0.142343	1.76838	14.2533	0.86065	0.560427	0.0279498	0.701689	2694.38	18.3461	18.6804	2867.74	23.6411	115.404	2764.77	16.2374	57.5963	106.434		2021-09-10 00:53:10.213	2021-09-10 00:53:10.213	16.082	243.922	52.0631	121.755	Below LOD	1193.49	2222.1	231.679	18.2027	2.60735	2.19916	1.57187	1.86696	301.633	90.5199	58.3577	0.66738	0.273781
DO1_4_78	big grain	11.0856	0.0163393	178.719	0.210741	127.84	217.238	1.72896	0.0924377	0.184127	0.000891686	0.0703581	1.64654	14.8141	0.894772	0.582266	0.0300154	0.955227	2689.24	7.19812	8.02616	2955.15	39.9397	123.062	2800.35	16.4454	58.589	109.888		2021-09-10 00:54:26.254	2021-09-10 00:54:26.254	24.707	715.73	108.877	167.714	Below LOD	1320.24	2869.42	215.951	13.3886	3.4551	12.3043	2.18805	2.41114	234.757	39.4246	78.3541	14.2497	1.55735
DO1_4_79	big grain	152.502	0.00763106	68.7406	0.316651	9.21152	709.479	2.02175	0.0946011	0.18804	0.0019048	0.113539	4.30722	12.808	0.762042	0.495055	0.0243254	0.898962	2722.64	15.9416	16.3105	2592.19	14.7284	103.979	2664.14	12.408	53.0201	95.2086		2021-09-10 00:55:38.507	2021-09-10 00:55:38.507	20.36	795.021	101.253	137.693	Below LOD	1037.41	2385.78	204.717	11.186	2.92482	8.44458	1.4977	1.99267	157.458	60.2287	63.5758	19.0341	6.47656
DO1_4_80	big grain	-21.9655	0.0204092	169.263	0.441549	-64.5079	132.276	2.00695	0.0968103	0.184599	0.000720945	0.137381	0.360719	12.6889	0.734242	0.498312	0.0241156	0.580797	2693.65	5.37786	6.4319	2606.51	4.17539	103.697	2656.67	3.7503	54.4247	96.7648		2021-09-10 00:56:59.458	2021-09-10 00:56:59.458	25.21	Below LOD	43.4526	135.468	Below LOD	907.184	2290.63	221.931	13.7069	2.85547	2.3252	0.792276	2.00127	Below LOD	26.7361	66.0659	1.0656	0.339662
DO1_4_81	big grain	-8.70282	0.0164102	133.519	0.311162	-162.898	165.886	2.01826	0.0980479	0.184279	0.000819805	0.110787	0.52983	12.5885	0.730067	0.495532	0.0241215	0.41088	2690.69	6.42127	7.32677	2594.53	4.67632	103.936	2649.18	3.98798	54.3844	96.4262		2021-09-10 01:00:24.066	2021-09-10 01:00:24.066	25.011	Below LOD	41.1948	95.1678	Below LOD	890.326	1620.75	216.196	10.869	2.03062	2.09606	0.850574	1.39479	Below LOD	23.2059	43.1623	0.447838	0.213239
DO1_4_82	big grain	3.24295	0.0353846	301.698	0.437402	438.132	184.642	1.91099	0.0929709	0.182813	0.000600218	0.187941	0.411562	13.192	0.766023	0.523502	0.0255414	0.888274	2677.69	4.11718	5.43279	2713.86	9.6264	108.009	2693.22	5.02469	54.7415	101.351		2021-09-10 01:01:40.275	2021-09-10 01:01:40.275	23.003	166.308	60.9231	112.45	Below LOD	879.422	1958.18	221.185	19.3626	2.37181	7.61243	1.5076	1.69747	461.322	96.8235	52.459	7.2809	1.07499
DO1_4_83	big grain	5.57701	0.00983802	88.4241	0.220243	254.069	152.619	2.12729	0.104165	0.184674	0.0012205	0.10257	1.13366	11.9573	0.697892	0.470456	0.0231277	0.580401	2693.67	10.4154	11.01	2485.3	12.0179	101.316	2601.61	7.0206	56.6185	92.2641		2021-09-10 01:02:52.763	2021-09-10 01:02:52.763	25.043	849.031	117.955	100.436	Below LOD	1112.44	1811.38	213.413	8.58214	2.14728	2.96381	0.857314	1.50317	147.874	39.7622	47.8049	4.47711	0.867986
DO1_4_84	big grain	22.5184	0.0105141	85.7931	0.348625	63.0224	157.905	2.04816	0.0990459	0.183615	0.000936356	0.14946	0.579671	12.3547	0.715835	0.488308	0.0236445	0.34953	2684.58	7.65646	8.43717	2563.31	5.10761	102.386	2631.5	4.58211	54.403	95.4826		2021-09-10 01:04:06.724	2021-09-10 01:04:06.724	25.013	Below LOD	52.779	94.5259	Below LOD	891.525	1691.33	219.174	11.4212	1.96029	3.31597	0.89385	1.40745	Below LOD	21.9175	46.0292	0.697197	0.255625
DO1_4_85	big grain	-31.3015	0.00592685	48.1644	0.19039	-45.2535	90.975	2.00389	0.0977796	0.184453	0.00149681	0.088022	2.53816	12.6785	0.740341	0.49919	0.0243416	0.296438	2691.23	12.9066	13.3813	2610.2	7.97353	104.664	2655.45	7.30259	54.7641	96.9892		2021-09-10 01:05:20.856	2021-09-10 01:05:20.856	25.004	Below LOD	46.8747	94.445	Below LOD	760.049	1674.74	210.693	13.0291	2.00092	2.58461	0.814176	1.45318	Below LOD	25.8622	46.3057	0.629414	0.226148
DO1_4_86	big grain	-10.6361	0.00411469	34.602	0.214775	-133.422	66.6896	1.99687	0.0974947	0.184118	0.00271115	0.107217	1.75433	12.701	0.7545	0.501041	0.0244308	-0.0405328	2684.88	24.0317	24.2902	2618.08	10.0991	104.929	2655.87	12.751	55.7554	97.5123		2021-09-10 01:06:35.157	2021-09-10 01:06:35.157	25.016	Below LOD	50.1373	98.394	Below LOD	728.705	1694.45	223.064	11.4157	2.12339	Below LOD	0.822008	1.42606	Below LOD	19.4531	45.528	Below LOD	0.0357819
DO1_4_87	big grain	1.79682	0.0224022	178.103	0.232045	788.596	75.4413	1.95313	0.0949483	0.184589	0.000691031	0.112254	0.504717	13.0213	0.756976	0.512128	0.0251221	0.751304	2693.59	5.07389	6.18752	2665.61	7.16881	106.925	2680.98	4.38349	54.9421	98.9614		2021-09-10 01:07:49.152	2021-09-10 01:07:49.152	25.073	457.74	93.3636	95.7069	Below LOD	678.151	1668.12	215.009	7.9306	2.05659	30.5417	7.44741	1.45219	126.223	43.0593	49.0039	1.72945	0.511136
DO1_4_88	big grain	-904.77	0.0219973	168.218	0.212934	-1.56656	17281.2	1.97022	0.0969044	0.184406	0.000713329	0.108681	1.16324	12.8979	0.75005	0.507593	0.0249203	0.615199	2691.92	5.31605	6.38419	2646.32	3.71589	106.588	2672.06	3.78218	54.6344	98.3061		2021-09-10 01:09:03.394	2021-09-10 01:09:03.394	25.049	Below LOD	54.4546	88.4085	Below LOD	887.623	1557.19	216.338	14.0779	1.89377	1.72584	0.889074	1.35032	Below LOD	18.7929	44.2926	0.34241	0.176071
DO2_24_1	small grain	2.37499	0.0313193	246.888	0.548001	596.086	105.015	2.05645	0.099751	0.185085	0.000628447	0.171115	0.319177	12.4245	0.717521	0.486538	0.0236087	0.836205	2698.78	4.53827	5.85076	2555.49	10.1085	102.359	2636.82	4.31452	54.4423	94.6906		2021-09-10 08:44:00.089	2021-09-10 08:44:00.089	25.011	3186.55	657.996	100.271	Below LOD	901.649	2065.44	238.028	9.47314	2.427	6.96838	1.30306	1.62209	373.047	125.826	55.9829	2.37056	0.535523
DO2_24_2	small grain	3.93119	0.0206117	176.524	0.174108	361.012	70.3632	2.08227	0.109625	0.183685	0.000746109	0.0657631	1.12528	12.2103	0.730619	0.482652	0.0245394	0.967817	2685.42	5.7023	6.71169	2537.15	30.2226	107.257	2618.45	14.0286	57.0871	94.4787		2021-09-10 08:45:16.855	2021-09-10 08:45:16.855	25.054	779.858	103.124	99.6138	Below LOD	834.415	1943.04	217.604	8.90012	2.37608	14.8663	4.17616	1.58654	2444.9	892.668	53.2091	8.26808	1.29257
DO2_24_3	small grain	7.74612	0.00442082	29.0123	0.237717	182.04	152.723	1.9617	0.0926437	0.188076	0.00227734	0.0779205	4.07221	13.2173	0.779538	0.509186	0.02511	0.447468	2721.64	19.4113	19.7224	2652.48	19.5796	108.236	2693.89	11.198	55.6297	97.4587		2021-09-10 08:46:29.948	2021-09-10 08:46:29.948	24.324	1606.36	226.901	72.6094	Below LOD	738.911	1429.07	172.441	17.0064	1.77416	3.91155	1.08477	1.1702	Below LOD	26.3106	39.6432	1.8421	0.469893
DO2_24_4	small grain	-11.7146	0.00767871	79.7949	0.391549	-121.383	117.7	2.79887	0.231147	0.183394	0.0018421	0.149242	2.59348	9.19289	0.557941	0.364971	0.0191864	0.944189	2680.98	16.0092	16.3862	2003.62	34.138	90.6433	2348.36	20.2671	67.7347	74.7344		2021-09-10 08:47:42.609	2021-09-10 08:47:42.609	24.577	1849.92	79.7334	83.0101	Below LOD	627.282	1615.02	291.234	13.7676	2.04005	12.2088	1.9224	1.39489	238.471	31.697	44.8251	15.7968	1.15478
DO2_24_5	small grain	-2.56355	0.0367443	241.707	0.52923	-553.003	90.8986	1.96013	0.0958864	0.18427	0.000613301	0.169433	0.156708	12.9463	0.782068	0.51021	0.0247873	0.54347	2690.79	4.21271	5.50474	2657.5	3.83053	105.926	2676.09	2.70384	54.6186	98.7628		2021-09-10 08:48:49.939	2021-09-10 08:48:49.939	26.422	413.652	87.8277	72.822	Below LOD	632.371	1429.23	216.422	8.09448	1.76114	3.55671	0.880065	1.1929	Below LOD	24.4057	38.3951	1.47908	0.761801
DO2_24_6	small grain	-24.3134	0.00687436	53.2124	0.158882	-58.4561	112.038	2.0574	0.101363	0.18279	0.00178182	0.0619125	2.57514	12.2575	0.719723	0.486402	0.0238746	0.599236	2675.94	15.7841	16.1797	2554.84	12.9178	103.585	2623.52	9.25787	55.3769	95.4746		2021-09-10 08:50:04.611	2021-09-10 08:50:04.611	20.587	189.135	35.5195	117.491	Below LOD	759.57	2179.09	232.198	16.0693	2.78098	1.90756	0.677546	1.80097	114.319	32.0517	65.9776	14.8011	6.70348
DO2_24_7	small grain	-0.433669	0.0238257	167.886	0.549325	-3268.13	43.9404	1.8911	0.0930893	0.184449	0.000747572	0.178335	0.407913	13.4479	0.7846	0.529022	0.0259993	0.794317	2692.28	5.7031	6.71831	2737.16	9.60114	109.627	2711.3	5.36044	55.4081	101.667		2021-09-10 08:51:13.121	2021-09-10 08:51:13.121	25.045	99.6355	43.1523	93.9778	Below LOD	878.288	1849.98	211.958	9.69298	2.26902	10.9364	2.78778	1.4771	60.1293	46.248	51.0667	3.34568	1.39629
DO2_24_8	small grain	0.687681	0.0142889	104.301	0.361686	2063.74	95.7896	1.99111	0.0951473	0.183469	0.00082795	0.113579	0.628922	12.7068	0.737576	0.502681	0.0234611	0.800932	2683.39	6.53334	7.42329	2624.99	13.1947	101.017	2657.69	6.37388	54.7353	97.8238		2021-09-10 08:54:49.733	2021-09-10 08:54:49.733	25.002	698.539	78.0308	76.9767	Below LOD	801.059	1478.98	227.703	10.2682	1.90023	2.90946	0.910503	1.17736	42.6547	28.9399	40.2477	2.27539	0.574414
DO2_24_9	small grain	4.36391	0.011244	178.967	0.520513	324.162	90.8625	2.24137	0.110641	0.185738	0.00120338	0.145975	0.606987	11.4547	0.675135	0.44748	0.0223152	0.863799	2703.22	10.0503	10.6494	2383.12	22.5671	99.2033	2559.5	11.018	54.9271	88.1585		2021-09-10 08:56:06.619	2021-09-10 08:56:06.619	25.011	7914.66	668.08	153.416	Below LOD	1112.37	2936.92	257.131	9.77958	3.73917	11.2479	2.74628	2.56263	177.756	51.3372	81.0542	14.4149	2.3939
DO2_24_10	small grain	-9.42685	0.0211286	155.107	0.532128	-150.031	226.844	2.12801	0.101778	0.185813	0.000790047	0.184922	0.316702	12.0334	0.70532	0.470057	0.0233563	0.936599	2704.43	6.07648	7.03417	2483.12	20.2029	102.781	2607.78	7.7136	51.842	91.8169		2021-09-10 08:57:21.022	2021-09-10 08:57:21.022	23.33	417.135	76.7158	73.1105	Below LOD	613.69	1377.55	233.86	9.56878	1.75432	4.68542	1.03049	1.19653	104.99	31.6354	39.7399	6.75066	1.47616
DO2_24_11	small grain	-4.30644	0.0244802	280.814	0.456555	-328.766	97.3085	2.07763	0.0998903	0.185209	0.000676361	0.121885	0.396658	12.3012	0.71391	0.481705	0.0235579	0.949707	2699.14	4.87206	6.01656	2534.41	12.3725	102.185	2627.31	5.5741	54.1343	93.8969		2021-09-10 08:58:32.201	2021-09-10 08:58:32.201	25.005	5152.42	744.485	116.102	Below LOD	1071.98	2206.79	245.288	9.63052	2.74202	7.5394	1.85003	1.92527	117.644	41.2608	62.3483	12.6556	3.18985
DO2_24_12	small grain	-36.5994	0.00944486	197.237	0.854022	-38.658	324.062	3.37464	0.196568	0.186158	0.00169967	0.254171	2.65993	7.70608	0.505211	0.301043	0.0172419	0.940731	2706.49	14.6616	15.0827	1693.8	45.0708	85.4154	2190.82	27.9456	59.4167	62.5829		2021-09-10 08:59:56.024	2021-09-10 08:59:56.024	18.202	4756.4	487.669	152.994	Below LOD	1400.95	2985.27	266.786	14.5647	3.7684	31.6781	6.41426	2.50616	409.239	94.0635	82.2943	48.9311	6.96868
DO2_24_13	small grain	70.7901	0.00915674	60.5349	0.258218	19.9894	301.816	1.94921	0.0940245	0.185346	0.00129084	0.0853211	1.36944	13.117	0.764305	0.5132	0.0250772	0.283448	2699.56	11.1117	11.6779	2670.15	8.28597	106.587	2687.64	6.35814	55.2186	98.9108		2021-09-10 09:01:02.193	2021-09-10 09:01:02.193	25.029	796.92	81.5251	72.4562	Below LOD	561.972	1426.61	230.372	8.68156	1.70943	1.4447	0.795767	1.15272	Below LOD	21.6401	39.2361	0.843218	0.262382
DO2_24_14	small grain	-0.246841	0.0340969	237.543	0.378116	-5731.8	102.428	2.02646	0.107278	0.185436	0.000782028	0.131841	0.300899	12.6583	0.742574	0.494707	0.02471	0.948105	2701.13	5.9884	6.95244	2590.17	24.6444	107.546	2653.76	9.56383	56.1699	95.8919		2021-09-10 09:02:20.173	2021-09-10 09:02:20.173	19.375	898.014	247.488	76.975	Below LOD	971.386	1523.51	234.802	10.3182	1.81929	7.31485	1.5822	1.23391	199.681	44.7003	41.9551	9.87069	2.04033
DO2_24_15	small grain	5.28785	0.00490713	32.5748	0.175624	268.084	74.9766	1.92736	0.0944284	0.184561	0.00200166	0.0669966	2.84923	13.212	0.776154	0.519148	0.0254021	0.173603	2691.03	17.45	17.8007	2695.35	10.9779	107.794	2693.84	9.64294	55.4181	100.16		2021-09-10 09:03:36.562	2021-09-10 09:03:36.562	25.005	451.882	47.3306	87.8614	Below LOD	686.135	1782.06	226.777	9.32912	2.17253	1.61038	0.738317	1.32876	Below LOD	18.9159	48.8393	0.269694	0.14711
DO2_24_16	small grain	-12.9782	0.00631859	51.4506	0.411174	-108.961	123.385	1.99681	0.10093	0.186026	0.0014943	0.13804	1.64363	12.8573	0.751491	0.500706	0.0245006	0.431669	2705.27	12.8235	13.3054	2616.6	11.1441	105.035	2668.54	7.88123	55.1028	96.7226		2021-09-10 09:04:53.617	2021-09-10 09:04:53.617	25.014	1845.46	159.323	83.6452	Below LOD	769.487	1659.59	233.07	6.75884	2.00413	4.29799	1.01361	1.44584	210.666	48.1596	45.5343	28.8358	6.81164
DO2_24_17	small grain	-49.4322	0.00477986	34.233	0.257309	-28.678	186.174	1.97968	0.097457	0.184861	0.0018781	0.0922935	1.82656	12.8464	0.755702	0.505474	0.0247269	0.314568	2696.95	15.6165	15.9757	2637.03	11.6569	105.97	2668.93	9.70692	53.2198	97.7785		2021-09-10 09:06:10.450	2021-09-10 09:06:10.450	25.041	1257.4	186.113	73.7097	Below LOD	747.498	1477.56	222.544	10.5217	1.79308	2.16494	0.791394	1.22483	Below LOD	18.5793	40.6581	0.425485	0.178031
DO2_24_18	small grain	-8.16002	0.0125294	80.1407	0.362598	-173.796	270.118	1.97787	0.0972819	0.184217	0.000838927	0.145063	0.550218	12.8428	0.746438	0.505756	0.024666	0.668796	2690.1	6.62046	7.50236	2638.37	8.01604	105.742	2667.88	5.17663	54.7724	98.0769		2021-09-10 09:08:42.109	2021-09-10 09:08:42.109	25.03	283.293	78.8329	70.8192	Below LOD	692.702	1391.25	232.672	13.6888	1.73527	3.14887	0.738772	1.13833	Below LOD	24.8961	39.3595	1.08499	0.412492
DO2_24_19	small grain	-10.0862	0.0238127	189.533	0.363528	-140.599	299.712	1.94215	0.0959411	0.184061	0.000626048	0.120477	0.438239	13.075	0.75936	0.515112	0.0251517	0.851003	2688.91	4.36283	5.61722	2678.26	9.34044	107.218	2684.82	4.76292	55.1255	99.6041		2021-09-10 09:09:50.742	2021-09-10 09:09:50.742	25.009	1866.21	208.794	85.198	Below LOD	820.31	1647.05	226.693	7.77317	2.0899	6.16705	2.6315	1.34163	Below LOD	23.6079	47.1033	0.627038	0.197447
DO2_24_20	small grain	-11.5993	0.00616198	40.8321	0.1872	-122.157	147.51	1.88675	0.0932156	0.184505	0.00170772	0.0741123	1.95587	13.498	0.791375	0.530273	0.0259053	0.284085	2691.25	14.8426	15.2569	2742.41	10.2594	109.321	2714.19	9.10396	55.3954	101.901		2021-09-10 09:11:03.684	2021-09-10 09:11:03.684	25.051	Below LOD	45.7142	79.4539	Below LOD	581.327	1515.88	225.733	8.82382	1.93054	1.57301	0.757913	1.19747	Below LOD	17.1287	40.5394	0.321966	0.149462
DO2_24_21	small grain	3.4637	0.0223052	161.869	0.431118	407.421	126.117	1.91846	0.0935267	0.187284	0.000960815	0.15245	0.580934	13.435	0.781027	0.521338	0.0253903	0.606316	2717.24	7.62735	8.39516	2704.79	5.87754	107.601	2711.31	5.19194	57.4165	99.542		2021-09-10 09:12:20.757	2021-09-10 09:12:20.757	25.003	1292.39	72.3792	80.6047	Below LOD	746.508	1554.58	219.716	8.36777	1.94355	2.77236	0.830623	1.29203	129.449	43.4935	44.5418	1.72181	0.377483
DO2_24_22	small grain	14.3467	0.00552387	40.8952	0.326583	98.5464	101.337	2.15305	0.107169	0.186191	0.00162952	0.110846	1.54032	11.9995	0.729806	0.467825	0.0242539	0.894663	2706.46	14.0079	14.4475	2471.58	36.6722	105.723	2600.86	17.3942	55.9247	91.3214		2021-09-10 09:13:37.774	2021-09-10 09:13:37.774	24.895	670.617	57.5642	73.1621	Below LOD	736.282	1432.09	229.29	10.4012	1.73702	4.10221	0.93047	1.23697	46.5159	25.0497	38.5636	5.34707	1.15561
DO2_24_23	small grain	23.9906	0.00917108	59.2595	0.35664	59.0842	133.361	1.91813	0.0938988	0.184417	0.00110916	0.118193	1.08376	13.2611	0.769734	0.521465	0.0253863	0.261039	2693	8.88688	9.51075	2705.3	7.03496	107.655	2698.13	4.98396	54.6701	100.457		2021-09-10 09:14:46.772	2021-09-10 09:14:46.772	25.004	793.599	85.5451	73.4766	Below LOD	576.194	1444.16	217.936	8.7388	1.76463	5.78208	1.84018	1.14609	Below LOD	18.665	37.6783	0.829169	0.243835
DO2_24_24	small grain	-70.7817	0.00576159	47.0471	0.283681	-19.8302	289.78	2.36544	0.121694	0.191004	0.00187357	0.123838	1.62826	11.1821	0.673946	0.425154	0.0217095	0.825127	2748.07	15.7445	16.134	2282.22	29.9154	98.1421	2538.06	15.3088	54.2934	83.0482		2021-09-10 09:16:03.644	2021-09-10 09:16:03.644	25.025	617.402	44.7786	73.291	Below LOD	685.852	1434.75	237.053	10.6066	1.77313	5.08035	0.783528	1.27582	63.0339	22.9734	39.5849	7.25776	1.56966
DO2_24_25	small grain	-1.29128	0.0162571	119.245	0.594257	-1099.32	102.613	2.19055	0.108629	0.183442	0.000965021	0.200864	0.677052	11.5545	0.679507	0.457366	0.0227445	0.88903	2683.08	7.95004	8.70425	2427.32	20.2768	100.549	2568.19	9.39769	55.029	90.4675		2021-09-10 09:17:12.444	2021-09-10 09:17:12.444	19.945	1210.5	202.079	75.9958	Below LOD	745.274	1433.93	259.298	12.1464	1.83804	12.885	3.83333	1.23003	254.432	40.9153	41.9174	12.1522	2.42676
DO2_24_26	small grain	-131.638	0.0157703	99.8224	0.330306	-10.7767	904.65	1.90981	0.0931097	0.183848	0.000767332	0.112638	0.520228	13.2661	0.768957	0.523949	0.0255243	0.814636	2686.84	5.90027	6.87491	2715.66	11.1847	107.975	2698.35	5.82304	54.66	101.073		2021-09-10 09:18:22.940	2021-09-10 09:18:22.940	27.178	Below LOD	32.7339	64.5431	Below LOD	627.437	1296.3	225.418	12.8936	1.56171	2.89067	0.843642	1.0452	Below LOD	15.9399	34.363	0.886996	0.233862
DO2_24_27	small grain	-14.3681	0.0545372	344.789	0.462006	-98.1737	328.141	1.85828	0.0909794	0.186563	0.00102353	0.157506	1.52389	13.8215	0.817574	0.539129	0.0266388	0.895814	2708.57	6.70523	7.28306	2779.06	21.0166	111.359	2740.89	13.522	61.9684	102.603		2021-09-10 09:19:43.754	2021-09-10 09:19:43.754	23.13	128.164	57.6565	71.4812	Below LOD	692.953	1415.72	219.91	12.186	1.69746	3.36116	0.728208	1.16797	122.327	29.3138	38.4168	3.8755	0.798323
DO2_24_28	small grain	5.5164	0.0163747	128.318	0.618749	256.337	82.1097	1.90569	0.0899745	0.186106	0.000915306	0.154835	0.864424	13.4492	0.782764	0.525266	0.025671	0.842002	2706.87	7.26155	8.06697	2721.09	14.6004	107.832	2711.07	7.44773	54.0107	100.525		2021-09-10 09:23:14.385	2021-09-10 09:23:14.385	25.022	3456.57	374.182	89.8314	Below LOD	959.237	1759.73	252.343	10.0487	2.15901	6.01675	1.42779	1.47315	250.978	42.6524	47.0677	5.78857	0.749924
DO2_24_29	small grain	-118.247	0.00803344	59.1621	0.156701	-11.9973	586.469	1.92694	0.0928128	0.183908	0.00129402	0.0476199	2.428	13.1459	0.765742	0.519166	0.0251577	0.538686	2686.68	11.1739	11.7308	2695.49	9.20726	106.633	2689.53	7.53304	55.4672	100.328		2021-09-10 09:24:23.079	2021-09-10 09:24:23.079	25.004	117.58	45.1334	84.7344	Below LOD	723.672	1659.54	224.55	12.5317	2.05178	3.1752	1.60864	1.35817	Below LOD	18.5684	45.236	0.623811	0.341502
DO2_24_31	small grain	-8.88948	0.0324336	205.575	0.624463	-159.438	184.614	1.92197	0.093739	0.18442	0.000625086	0.184288	0.277963	13.2273	0.767684	0.520804	0.0253988	0.939691	2692.81	4.14961	5.3547	2702.22	14.2486	107.654	2695.44	7.0329	54.956	100.349		2021-09-10 09:26:53.138	2021-09-10 09:26:53.138	25.027	254.164	45.1376	71.953	Below LOD	628.713	1451.29	220.769	7.70913	1.75804	4.90625	0.739883	1.19471	144.895	61.1583	38.3688	2.61903	0.549262
DO2_24_32	small grain	-7.89659	0.00696323	92.4178	0.722985	-178.249	75.7664	3.54098	0.192599	0.189101	0.00233396	0.19374	1.7602	7.38416	0.45677	0.283571	0.0147975	0.817619	2732.03	20.1323	20.4426	1608.7	26.7809	74.5922	2156.94	19.5826	55.6138	58.8829		2021-09-10 09:28:04.399	2021-09-10 09:28:04.399	12.221	3363.24	280.212	102.371	Below LOD	1204.47	2042.18	258.323	10.231	2.51077	20.7357	3.43359	1.68494	983.724	120.857	56.7139	30.7061	3.38418
DO2_24_33	small grain	-25.4449	0.00536838	57.779	0.78592	-55.2408	96.1663	2.21625	0.116121	0.189751	0.00196177	0.107782	2.17498	11.8557	0.705762	0.45301	0.0227078	0.662332	2739.57	15.8769	16.2292	2407.42	24.8259	101.336	2592.89	12.8774	53.8604	87.8757		2021-09-10 09:29:12.398	2021-09-10 09:29:12.398	27.182	3741.26	635.711	99.8636	Below LOD	949.921	2007.45	241.124	8.34012	2.39852	8.36057	1.68224	1.6433	136.459	45.3896	53.5846	13.9476	2.73305
DO2_24_34	small grain	3.24675	0.0395783	248.355	0.678609	436.331	101.775	1.92413	0.0935288	0.184716	0.000541006	0.1759	0.56488	13.2358	0.766123	0.520115	0.0252993	0.951618	2695.36	3.15467	4.6265	2699.38	12.6275	107.272	2696.19	6.0361	54.5643	100.149		2021-09-10 09:30:27.410	2021-09-10 09:30:27.410	25.059	1038.08	62.6952	67.621	Below LOD	607.448	1324.9	211.017	7.96822	1.64357	5.60204	0.961681	1.03766	95.774	26.8879	37.3027	3.46742	0.528937
DO2_24_35	small grain	-79.2879	0.00295125	20.7369	0.35099	-17.8614	145.001	1.94912	0.0959959	0.185119	0.00308546	0.0932475	3.0706	13.0946	0.789044	0.513489	0.025186	0.219789	2696.75	28.7916	29.0324	2671.19	13.2306	107.328	2686.02	16.6982	59.469	99.0522		2021-09-10 09:31:44.875	2021-09-10 09:31:44.875	25.002	Below LOD	38.3154	77.4052	Below LOD	699.538	1548.8	223.558	8.95098	1.86767	Below LOD	0.646313	1.27521	Below LOD	21.6266	41.9437	Below LOD	0.0726826
DO2_24_36	small grain	0.991008	0.0569405	452.901	0.723251	1431.88	78.7678	2.14777	0.106877	0.183644	0.000550852	0.173138	0.419371	11.788	0.685251	0.465793	0.0227856	0.888212	2685.21	3.4674	4.9537	2464.95	8.49986	100.47	2587.5	4.2941	54.7241	91.7972		2021-09-10 09:33:02.141	2021-09-10 09:33:02.141	25.174	2273.9	178.665	79.3973	Below LOD	828.656	1498.49	241.845	7.72938	1.87853	12.6655	2.90252	1.19152	283.084	45.4628	45.3969	12.498	1.65608
DO2_24_37	small grain	-0.723619	0.0305994	198.28	0.44115	-1956.06	148.011	2.05604	0.102786	0.185275	0.000598105	0.113011	0.504591	12.4322	0.727152	0.486843	0.0240422	0.942899	2699.82	3.98619	5.3289	2556.67	15.296	104.435	2637.21	6.65201	55.0313	94.698		2021-09-10 09:34:12.776	2021-09-10 09:34:12.776	19.488	1338.25	210.922	94.6163	Below LOD	908.542	1819.86	227.592	10.2566	2.25739	19.7612	12.6285	1.61987	179.378	56.8189	52.197	8.77714	2.50275
DO2_24_38	small grain	-4.98298	0.0103232	89.62	0.630807	-284.617	63.4276	1.99083	0.101812	0.184038	0.00165693	0.141471	1.00065	12.76	0.762627	0.502747	0.0251266	0.81455	2688.36	14.4386	14.8656	2625.28	24.4931	108.188	2661.42	14.2842	57.1173	97.6533		2021-09-10 09:37:01.124	2021-09-10 09:37:01.124	7.334	3630.97	720.175	142.322	Below LOD	1834.53	2882	215.825	13.2047	3.49388	4.31509	2.01541	2.42712	108.044	54.9768	82.6507	17.9444	15.6966
DO2_24_39	small grain	-7.34652	0.00587538	53.2643	0.632791	-192.505	144.349	2.06855	0.102001	0.186028	0.00181024	0.152705	1.57156	12.3908	0.726693	0.483634	0.0236773	0.231783	2704.75	15.7112	16.1063	2542.93	9.25036	102.985	2633.65	8.85274	55.4312	94.0173		2021-09-10 09:38:03.124	2021-09-10 09:38:03.124	23.353	1764.51	92.3098	93.0426	Below LOD	1011.89	1844.79	229.701	7.73339	2.22895	5.65885	1.48496	1.54521	105.634	34.5118	51.6953	6.78196	1.37274
DO2_24_40	small grain	10.7027	0.0185814	127.939	0.365155	132.572	119.999	1.94393	0.0944303	0.183846	0.000757631	0.102274	0.546467	13.0481	0.756107	0.514541	0.0249986	0.592043	2686.86	5.82238	6.81557	2675.9	6.91737	106.397	2682.95	4.01623	54.6252	99.5922		2021-09-10 09:39:20.023	2021-09-10 09:39:20.023	25.014	86.9466	42.1609	74.5946	Below LOD	623.351	1508.79	232.567	11.0944	1.80134	1.77739	0.763219	1.25839	247.437	128.925	42.013	2.77448	0.799871
DO2_24_41	small grain	21.1488	0.0385952	330.63	0.549067	66.5623	1143.39	2.11515	0.107433	0.188863	0.000671671	0.158349	0.961945	12.3405	0.724839	0.473873	0.0236323	0.967561	2731.4	4.66219	5.8413	2499.76	22.4159	103.632	2629.82	9.33247	55.2014	91.5196		2021-09-10 09:40:33.984	2021-09-10 09:40:33.984	20.912	1868.8	380.092	94.3267	Below LOD	967.179	1889.27	242.68	12.8706	2.22957	19.8841	3.11434	1.50881	657.248	78.8575	50.9103	31.7617	3.46599
DO2_24_42	small grain	42.2195	0.00299768	44.6981	0.754249	33.0932	81.9698	2.38279	0.133279	0.194386	0.00398747	0.163601	3.03362	11.3161	0.720895	0.422946	0.0232396	0.693161	2774.19	33.9803	34.1672	2271.66	48.9019	105.288	2545.99	24.6745	58.9401	81.8855		2021-09-10 09:41:48.152	2021-09-10 09:41:48.152	12.69	6184.16	511.678	166.435	Below LOD	1732.83	3284.57	242.314	13.3363	4.0745	2281.84	271.918	2.81942	131.476	49.812	92.263	15.1155	2.70287
DO2_24_43	small grain	4.43935	0.0127279	134.425	0.368921	319.487	75.851	2.221	0.109409	0.184003	0.000939348	0.0854362	1.33331	11.4106	0.664057	0.450559	0.0220541	0.734712	2688.06	7.65425	8.43268	2397.52	10.8297	98.0939	2557.83	6.27421	56.8203	89.1918		2021-09-10 09:43:06.601	2021-09-10 09:43:06.601	25.051	4780.12	629.608	105.183	Below LOD	737.64	2015.93	239.356	10.0771	2.52011	47.4075	30.5359	1.56266	83.1071	32.0871	58.1002	4.4477	0.980247
DO2_24_44	small grain	-0.274853	0.023262	180.55	0.501038	-5157.79	94.44	1.98653	0.0971897	0.184181	0.000643292	0.129738	0.305605	12.7909	0.741466	0.503451	0.0245764	0.543543	2689.97	4.56092	5.77506	2628.57	4.85298	105.415	2664.26	3.08732	54.5143	97.7176		2021-09-10 09:44:25.129	2021-09-10 09:44:25.129	25.017	1171.92	179.531	81.3134	Below LOD	753.095	1631.95	238.439	10.8985	1.89789	4.6069	1.01964	1.37792	299.027	65.3834	45.6253	1.96221	0.426778
DO2_24_45	small grain	-3.25808	0.0261958	179.18	0.512107	-434.641	73.551	1.97501	0.100919	0.184879	0.000690834	0.14626	0.865113	12.9169	0.749827	0.506666	0.0247944	0.831506	2696.17	5.04553	6.15868	2642.14	11.075	106.83	2673.36	4.50285	55.2082	97.9962		2021-09-10 09:45:42.222	2021-09-10 09:45:42.222	26.617	576.53	197.253	73.7544	Below LOD	632.027	1451.3	221.691	11.0535	1.75277	5.42481	1.61832	1.22128	Below LOD	19.4795	40.4338	1.46815	0.616876
DO2_24_46	small grain	-92.266	0.0320974	231.805	0.442789	-15.3276	1615.06	1.98687	0.0973253	0.185852	0.000718962	0.120911	0.352353	12.911	0.749876	0.503478	0.0245672	0.791893	2704.83	5.32015	6.38925	2628.6	8.31583	105.392	2672.9	4.96904	54.9159	97.1818		2021-09-10 09:47:02.322	2021-09-10 09:47:02.322	25.042	1548.69	86.8066	79.8894	Below LOD	1029.04	1593.37	234.017	7.42299	1.89979	5.78311	0.962445	1.30414	175.792	36.3398	45.7693	8.57894	1.16273
DO2_24_47	small grain	59.8861	0.00835629	81.4792	0.383049	23.6644	301.348	2.12456	0.101729	0.184562	0.00116098	0.0912526	1.24856	11.9977	0.702228	0.471075	0.0230919	0.760095	2694.34	9.37155	9.96736	2487.99	12.3415	100.794	2603.41	8.37733	54.6711	92.3414		2021-09-10 09:48:16.344	2021-09-10 09:48:16.344	25.008	3085.62	220.707	95.6349	Below LOD	1010.4	1834.62	228.282	8.2088	2.30251	5.30687	1.25909	1.55276	64.8807	33.4467	56.0169	2.915	0.661255
DO2_24_48	small grain	-15.3639	0.0151018	105.429	0.552837	-92.152	164.12	2.07613	0.101799	0.185149	0.000961497	0.154221	0.455486	12.3014	0.714525	0.481779	0.0234645	0.546266	2698.3	7.80787	8.57117	2534.93	6.67271	102.186	2627.36	5.30946	55.1145	93.9452		2021-09-10 09:51:54.813	2021-09-10 09:51:54.813	25.016	642.026	46.5149	74.1718	Below LOD	707.412	1445.97	229.358	9.41768	1.78899	4.58156	0.939497	1.2799	70.7246	21.2673	42.0752	4.68105	0.966663
DO2_24_49	small grain	4.82441	0.0210789	153.911	0.333291	293.427	131.888	2.06751	0.0981254	0.185015	0.000688331	0.0835055	0.840871	12.3545	0.717956	0.484007	0.0236763	0.812842	2697.4	5.00452	6.12166	2544.45	11.5123	102.323	2631.37	5.52281	54.0461	94.33		2021-09-10 09:53:04.069	2021-09-10 09:53:04.069	25.037	3264.68	318.374	74.5019	Below LOD	758.507	1464.38	238.009	6.19445	1.79819	5.84799	1.04527	1.22166	103.096	34.4674	42.1633	5.11653	1.07854
DO2_24_50	small grain	143.951	0.00839503	63.7533	0.180091	9.83729	636.938	2.17674	0.111724	0.185097	0.0014045	0.0571744	1.88748	11.7747	0.701784	0.460865	0.0230378	0.865725	2697.17	11.9802	12.4882	2442.38	23.5496	102.042	2584.54	13.6675	56.6635	90.5535		2021-09-10 09:54:22.581	2021-09-10 09:54:22.581	25.016	590.813	140.272	76.9745	Below LOD	573.064	1530.9	226.245	10.6924	1.83213	82.8866	57.3011	1.27226	90.58	30.5415	43.593	2.54987	0.692027
DO2_24_51	small grain	9.33772	0.0155457	120.483	0.31914	151.56	84.7908	2.16894	0.109178	0.185423	0.00114604	0.0933013	1.59611	11.8112	0.692808	0.461605	0.0227822	0.816272	2700.73	9.52467	10.1541	2446.26	17.4637	100.764	2588.87	9.32382	54.9146	90.5778		2021-09-10 09:55:36.125	2021-09-10 09:55:36.125	17.37	1542.71	102.999	88.341	Below LOD	780.996	1786.22	233.748	8.09977	2.11695	32.0694	20.2409	1.48588	Below LOD	25.4737	48.9246	2.57462	0.600232
DO2_24_200	small grain	0.724861	0.0293547	211.355	0.460903	1956.83	68.3124	1.92912	0.0929811	0.184	0.000605356	0.146419	0.236836	13.1587	0.764507	0.51848	0.0253409	0.770566	2688.38	4.12498	5.43539	2692.65	6.57035	107.32	2690.92	3.90112	54.6941	100.159		2021-09-10 09:56:49.783	2021-09-10 09:56:49.783	25.1	Below LOD	34.5701	80.4002	Below LOD	755.031	1604.21	225.933	12.282	1.9136	2.43015	0.758584	1.2339	Below LOD	19.9347	45.0542	0.327673	0.136836
DO2_24_201	small grain	88.2243	0.00779433	55.6596	0.830197	16.0634	526.183	1.95989	0.0960865	0.18458	0.00130792	0.262367	0.702041	12.9984	0.75737	0.510409	0.0249351	0.305303	2694.44	10.6562	11.1794	2658.25	8.34778	106.477	2679.05	6.46293	54.9492	98.6567		2021-09-10 09:58:08.519	2021-09-10 09:58:08.519	25.013	Below LOD	43.4502	86.4275	Below LOD	710.648	1652.88	229.989	11.4377	2.01956	2.76608	0.889533	1.40556	52.8476	24.6913	47.842	1.9057	0.52022
DO2_24_202	small grain	7.2852	0.0213421	147.262	0.42139	194.751	186.079	1.93769	0.0942281	0.183748	0.00064934	0.132112	0.325077	13.0863	0.758362	0.516112	0.025114	0.574175	2686.8	4.44603	5.59049	2682.65	3.6037	106.77	2685.77	3.21661	54.6969	99.8454		2021-09-10 09:59:22.598	2021-09-10 09:59:22.598	25.008	Below LOD	36.7698	77.0307	Below LOD	677.103	1541.11	224.794	11.3111	1.84086	2.16711	0.701434	1.15854	Below LOD	17.8491	44.8263	0.884948	0.260487
DO2_24_203	small grain	0.389659	0.0296132	203.02	0.519563	3637.38	103.195	1.92363	0.0940219	0.184412	0.000627203	0.168481	0.438025	13.2354	0.770683	0.520117	0.0254891	0.880466	2692.06	4.36087	5.61477	2699.48	10.3982	108.036	2696.27	5.2437	54.8537	100.276		2021-09-10 10:00:41.384	2021-09-10 10:00:41.384	25.01	Below LOD	46.3146	75.4774	Below LOD	745.192	1459.68	221.68	11.7513	1.86165	2.86802	0.671798	1.22395	333.857	87.3053	42.488	1.84327	0.380252
DO2_24_205	small grain	-6.24645	0.026397	219.908	0.327606	-227.386	76.7833	2.12122	0.103772	0.18307	0.00104494	0.0931684	1.00017	11.9164	0.696073	0.471677	0.0230522	0.804382	2679.69	8.7796	9.47203	2490.74	11.7083	100.985	2597.33	8.10877	54.9706	92.9486		2021-09-10 10:03:09.132	2021-09-10 10:03:09.132	17.748	2763.4	604.647	87.6709	Below LOD	1163.62	1755.22	238.672	6.28437	2.07976	87.7039	57.1964	1.48494	369.54	131.397	50.3469	9.98383	3.33408
DO2_24_206	small grain	4.95432	0.0844499	814.573	0.342795	289.467	569.062	2.05728	0.114453	0.176623	0.000812495	0.128496	0.322424	11.9473	0.726357	0.488995	0.0249918	0.978322	2620.32	6.71899	7.59254	2564.38	33.8774	109.61	2596.74	18.3225	59.1394	97.8653		2021-09-10 10:05:47.682	2021-09-10 10:05:47.682	23.654	804.551	138.603	100.557	Below LOD	1124.63	1946.53	233.15	17.5143	2.48211	17.0501	3.40998	1.65168	873.99	97.9449	56.0207	30.436	4.13105
DO2_24_207	small grain	0.264091	0.0463537	337.219	0.525751	5368.97	90.0475	1.94574	0.197599	0.184397	0.000581463	0.1769	0.876086	13.0993	0.761644	0.516127	0.0251303	0.985617	2693.09	4.41781	6.02057	2682.58	9.18044	107.315	2686.37	6.40317	58.1255	99.6099		2021-09-10 10:07:00.277	2021-09-10 10:07:00.277	25.053	135.923	76.231	78.0877	Below LOD	751.264	1516.49	226.491	9.34425	1.8841	3.35238	0.833635	1.25785	48.2993	31.8536	42.1933	2.12795	0.728067
DO2_24_208	small grain	125.019	0.00421947	30.4255	0.423483	11.3886	280.51	2.00293	0.0968466	0.181868	0.00237481	0.170546	2.74164	12.5449	0.749126	0.500102	0.024703	0.517892	2665.56	21.2855	21.5779	2613.63	18.3283	105.738	2643.85	14.0508	56.4199	98.0518		2021-09-10 10:08:19.059	2021-09-10 10:08:19.059	25.014	Below LOD	43.4264	78.6379	Below LOD	702.99	1533.25	223.341	10.5559	1.88603	1.8639	0.748608	1.33753	Below LOD	17.1657	42.9111	0.532302	0.182221
DO2_24_209	small grain	-17.4116	0.00862813	68.2773	0.422063	-81.8556	92.2061	2.06499	0.104181	0.180948	0.00135319	0.142527	1.14832	12.0593	0.706812	0.484539	0.0236568	0.672306	2659.63	11.8881	12.4082	2546.81	10.0307	103.248	2608.02	9.1617	55.5656	95.7584		2021-09-10 10:09:26.165	2021-09-10 10:09:26.165	26.147	Below LOD	37.5395	79.2453	Below LOD	653.185	1488.08	224.295	12.4504	1.92068	5.05937	1.1019	1.30521	135.986	39.0354	42.9425	16.5252	4.65201
DO2_24_210	small grain	-2.83163	0.0174229	114.902	0.228959	-502.837	84.355	1.84815	0.0985719	0.181522	0.00122866	0.123391	4.19662	13.622	0.831206	0.543433	0.0276597	0.963803	2665.34	10.573	11.1459	2796.13	33.9609	116.365	2720.62	18.669	58.9059	104.907		2021-09-10 10:10:46.579	2021-09-10 10:10:46.579	25.01	Below LOD	37.273	103.359	Below LOD	790.06	1911.1	229.236	13.5345	2.41842	3.93038	1.06501	1.66021	170.993	34.6467	56.8143	7.32557	1.60769
DO2_24_211	small grain	2.45041	0.0253505	171.233	0.479898	578.887	104.684	1.86516	0.268548	0.184275	0.000754355	0.169631	0.603357	13.7297	0.800081	0.540415	0.0264965	0.982168	2690.71	5.7525	6.75065	2784.93	11.782	110.629	2730.82	6.04913	55.0516	103.502		2021-09-10 10:12:05.423	2021-09-10 10:12:05.423	25.089	Below LOD	40.7092	78.1298	Below LOD	711.952	1547.43	215.525	12.8605	1.89828	1.95255	0.758392	1.31643	Below LOD	19.6405	41.6903	0.498091	0.196878
DO2_24_212	small grain	-0.38105	0.0221666	186.26	0.463503	-3686.47	78.9103	1.93189	0.101004	0.190278	0.000847564	0.170634	0.520773	13.6064	0.794803	0.518229	0.0254827	0.908733	2743.54	6.44181	7.34736	2691.25	16.5168	109.276	2722.09	8.03755	56.4006	98.0942		2021-09-10 10:13:19.716	2021-09-10 10:13:19.716	20.96	Below LOD	54.9084	126.205	Below LOD	1043.1	2453	224.801	11.4937	3.08454	4.81051	1.06621	2.07347	319.093	51.3457	65.9915	9.95668	1.4836
DO2_24_213	small grain	1.89011	0.046458	296.876	0.565511	750.299	60.1159	1.88179	0.0923044	0.18404	0.000623759	0.198917	0.195014	13.5099	0.793147	0.532188	0.0263368	0.965401	2688.75	4.32825	5.58518	2750.09	19.5639	110.622	2715.18	9.1698	55.3044	102.281		2021-09-10 10:14:23.118	2021-09-10 10:14:23.118	20.773	510.756	57.6267	72.7077	Below LOD	588.155	1418.81	230.776	11.5711	1.74042	6.86635	1.44904	1.17267	254.382	46.6387	40.779	34.9425	14.2727
DO2_24_214	small grain	-138.941	0.0122242	83.224	0.323699	-10.1767	4014.58	1.99421	0.0970703	0.185829	0.000986729	0.106829	0.731018	12.8518	0.746579	0.501503	0.0244527	0.562515	2704.32	8.0319	8.77806	2620.21	4.52922	104.949	2668.56	5.01501	54.8437	96.8898		2021-09-10 10:15:43.569	2021-09-10 10:15:43.569	25.185	1260.13	133.095	69.9063	Below LOD	736.696	1381.94	217.722	9.35521	1.66416	1.96821	0.758111	1.11141	132.212	31.4597	39.508	2.42891	0.564715
DO2_24_215	small grain	1.676	0.0486742	326.923	0.298204	846.255	52.0116	1.9065	0.0922511	0.184044	0.000601965	0.103501	0.176591	13.3164	0.776244	0.524921	0.0257582	0.926778	2688.78	4.0831	5.40313	2719.72	12.7144	108.612	2701.88	6.36014	54.9749	101.151		2021-09-10 10:17:02.503	2021-09-10 10:17:02.503	25.11	77.1297	45.9736	71.6012	Below LOD	700.008	1387.74	221.696	10.9683	1.70803	3.27437	1.11258	1.17206	Below LOD	21.2813	41.1469	0.250214	0.127898
DO2_24_216	small grain	-7.38196	0.0264673	194.919	0.498859	-192.031	470.899	1.98542	0.0999413	0.184075	0.000733057	0.155974	0.634903	12.8077	0.742846	0.503972	0.0246438	0.937498	2688.94	5.54337	6.57616	2630.63	10.8365	106.074	2665.38	4.45628	54.4138	97.8316		2021-09-10 10:24:59.466	2021-09-10 10:24:59.466	25.025	872.301	64.9502	76.7959	Below LOD	626.222	1540.1	228.517	12.6002	1.83274	3.01767	1.27507	1.29338	49.0152	25.9707	44.3124	1.25368	0.255765
DO2_24_217	small grain	6.78671	0.0110869	80.8354	0.387111	209.078	104.191	1.92688	0.0937026	0.183724	0.00101331	0.130424	0.70952	13.144	0.76426	0.519098	0.0252914	0.574652	2685.45	8.4025	9.11841	2695.26	7.07742	107.284	2689.65	5.83382	54.724	100.365		2021-09-10 10:26:17.964	2021-09-10 10:26:17.964	25.011	Below LOD	37.671	74.9405	Below LOD	659.496	1516.92	220.272	11.326	1.81825	2.28013	0.896305	1.18753	Below LOD	18.3541	42.3093	0.314842	0.130639
DO2_24_218	small grain	-44.9125	0.00449049	31.4794	0.32333	-31.5669	377.869	1.87535	0.0914313	0.184205	0.00226308	0.11722	2.22129	13.5436	0.800795	0.533735	0.0261748	0.280928	2687.08	20.1145	20.4275	2756.8	14.3009	109.867	2718.68	12.3097	58.9823	102.595		2021-09-10 10:27:36.523	2021-09-10 10:27:36.523	25.015	Below LOD	31.0621	72.8977	Below LOD	627.939	1467.07	227.633	13.6595	1.75099	1.63943	0.597103	1.17526	106.001	33.9661	42.0041	0.317223	0.12905
DO2_24_219	small grain	-0.357848	0.052754	519.817	0.5919	-3956.32	100.693	2.12826	0.111824	0.184911	0.000763446	0.224558	0.965586	12.0423	0.718698	0.471653	0.0239273	0.975314	2696.47	5.83787	6.82971	2489.59	29.8158	105.338	2606.03	13.8838	56.7503	92.3277		2021-09-10 10:28:55.201	2021-09-10 10:28:55.201	19.09	508.283	79.4315	105.01	2274.88	1324.11	1960.94	254.089	14.8406	2.5336	29.9469	4.23319	1.75352	1564.88	201.557	60.274	54.0469	7.05177
DO2_24_220	small grain	-7.759	0.032204	247.156	0.591446	-182.505	236.007	1.93554	0.0955557	0.185001	0.000641905	0.170654	0.226299	13.1804	0.765819	0.517063	0.0253093	0.898303	2697.31	4.50261	5.7234	2686.41	12.814	107.665	2692.26	5.82105	54.7134	99.5961		2021-09-10 10:30:09.239	2021-09-10 10:30:09.239	25.012	1709.09	356.026	89.6657	Below LOD	847.868	1829.88	216.521	7.86254	2.16028	3.21824	0.95414	1.43766	87.8806	31.9532	49.4252	4.41658	1.48465
DO2_24_221	small grain	-1.92753	0.00892102	71.1992	0.263056	-737.712	97.4659	2.09858	0.103863	0.182421	0.00136147	0.084788	1.31034	12.0059	0.708846	0.477726	0.0237411	0.817243	2675.02	11.3134	11.8105	2516.49	21.6893	103.454	2603.37	11.3827	55.4691	94.0737		2021-09-10 10:31:18.718	2021-09-10 10:31:18.718	25.012	397.379	51.2558	82.5173	Below LOD	795.906	1579.36	235.818	11.0309	2.00655	4.46213	0.836347	1.37566	113.01	33.0048	48.4331	5.00778	0.642511
DO2_24_222	small grain	15.3763	0.00978644	74.1301	0.40327	92.3851	102.892	2.06553	0.111561	0.183035	0.00121529	0.133936	0.715937	12.2873	0.74175	0.487109	0.0248755	0.933609	2678.92	10.4469	11.0371	2556.13	33.3972	108.725	2623.39	16.8035	58.1361	95.4165		2021-09-10 10:32:33.323	2021-09-10 10:32:33.323	25.023	696.588	53.5944	73.9003	Below LOD	655.67	1436.35	223.23	9.2838	1.74923	3.08553	0.777827	1.2474	Below LOD	23.1453	41.286	2.83848	0.681388
DO2_24_223	small grain	1.08068	0.0500592	368.448	0.505735	1312.38	56.5504	1.82248	0.0890434	0.18399	0.000617642	0.174245	2.48898	13.9404	0.819211	0.549835	0.0272295	0.972925	2688.28	4.26975	5.54548	2823.64	21.6199	112.967	2744.52	9.98424	55.3176	105.035		2021-09-10 10:33:51.821	2021-09-10 10:33:51.821	25.028	Below LOD	51.746	83.6875	Below LOD	930.199	1640.09	208.63	12.9998	1.99282	2.57032	0.88551	1.30835	Below LOD	30.2357	47.2094	0.632564	0.242924
DO2_24_224	small grain	-0.641816	0.0489175	613.744	0.609876	-2209.7	78.4255	2.49838	0.123516	0.184036	0.00089911	0.222913	0.393129	10.1613	0.594616	0.400728	0.0196971	0.885391	2688.46	7.25399	8.07115	2172.08	13.8892	90.7022	2448.81	8.64678	53.9011	80.7929		2021-09-10 10:35:08.948	2021-09-10 10:35:08.948	22.014	1250.97	105.894	105.427	Below LOD	1134.27	2065.18	256.315	11.5744	2.54974	27.4598	2.95965	1.76531	1874.39	168.931	61.104	85.4484	7.33215
DO2_24_225	small grain	-4.73227	0.0273661	402.102	1.30437	-289.187	82.0077	2.33398	0.129083	0.208083	0.0011964	0.442493	0.295601	12.4106	0.769626	0.433194	0.0233227	0.972084	2889.41	8.66944	9.34205	2316.94	44.9063	105.237	2631.53	21.2598	59.3703	80.1874		2021-09-10 10:36:27.760	2021-09-10 10:36:27.760	21.794	1411.21	131.9	174.665	Below LOD	1549.07	3459.3	308.264	22.392	4.26967	31.2972	4.34836	2.73527	2836.54	266.354	98.7009	156.485	18.3611
DO2_24_226	small grain	42.8307	0.02882	230.975	0.506569	33.0401	424.932	1.9498	0.0998074	0.185328	0.000710555	0.169162	0.350877	13.1263	0.767872	0.513882	0.0254075	0.938663	2701.1	5.53536	6.67453	2672.47	20.9302	108.794	2687.91	9.15284	55.8428	98.9402		2021-09-10 10:39:05.579	2021-09-10 10:39:05.579	22.523	Below LOD	41.0418	103.521	Below LOD	811.282	1974.85	233.52	16.5782	2.47505	4.76541	1.23155	1.6736	265.741	67.4939	59.9872	6.12514	1.51184
DO2_24_227	small grain	1.11657	0.0185233	127.447	0.549783	1271.29	63.301	1.95179	0.093209	0.183453	0.000803233	0.176789	0.330918	12.9661	0.755992	0.512995	0.0251469	0.896294	2683.27	6.32278	7.24992	2668.93	16.2228	106.654	2676.45	8.04994	54.3732	99.4653		2021-09-10 10:40:21.496	2021-09-10 10:40:21.496	25.04	Below LOD	33.509	72.9284	Below LOD	799.413	1406.21	224.898	10.2619	1.72545	2.80062	0.709646	1.2209	57.6459	20.8502	40.544	1.11524	0.256842
DO2_24_228	small grain	-22.189	0.00384554	28.9735	0.39553	-63.8676	101.297	1.98027	0.097592	0.18502	0.00274277	0.130527	1.73798	12.8739	0.766393	0.505324	0.024718	0.0756672	2692.79	24.3983	24.6571	2636.39	11.5777	105.961	2668.42	13.3194	56.3303	97.9058		2021-09-10 10:41:35.336	2021-09-10 10:41:35.336	25.019	Below LOD	35.4037	104.193	Below LOD	675.325	2047.49	233.268	15.5818	2.42131	Below LOD	0.701891	1.82794	Below LOD	19.9722	62.0659	Below LOD	0.101855
DO2_24_229	small grain	2.20977	0.0270143	199.551	2.73475	640.949	93.2185	1.91858	0.0974046	0.184874	0.000705913	0.846861	0.981802	13.3091	0.781978	0.522387	0.0258153	0.964436	2696.12	5.21006	6.29433	2708.46	21.3884	109.752	2700.51	10.696	56.1779	100.458		2021-09-10 10:42:44.767	2021-09-10 10:42:44.767	25.122	488.679	85.5694	82.0247	Below LOD	603.492	1619.79	227.423	8.21365	1.97773	7.17759	1.29897	1.29493	431.75	87.204	46.0617	10.3032	1.15381
DO2_24_230	small grain	2.42946	0.0147522	96.5671	0.333182	583.746	61.319	1.80505	0.0871093	0.184063	0.000960209	0.111208	1.2295	14.0515	0.814123	0.55413	0.0268008	0.436691	2688.58	7.82602	8.58313	2842.23	7.24709	111.114	2752.91	4.92245	55.1127	105.715		2021-09-10 10:43:58.664	2021-09-10 10:43:58.664	25.009	Below LOD	34.0135	74.7209	Below LOD	673.675	1469.89	219.496	10.3645	1.86113	1.37951	0.642829	1.23978	Below LOD	16.9011	41.6092	0.133428	0.0924108
DO2_24_231	small grain	1.14131	0.0114779	90.5228	0.521319	1242.7	94.4483	1.9921	0.13124	0.183711	0.00134767	0.178267	1.64547	12.8165	0.750326	0.503545	0.0249925	0.960646	2690.14	11.6854	12.218	2628.11	22.6304	111.404	2665.27	9.56455	59.5104	97.6943		2021-09-10 10:45:17.190	2021-09-10 10:45:17.190	25.045	Below LOD	46.7487	76.3018	Below LOD	796.365	1528.9	225.778	9.39063	1.8323	1.28603	0.750474	1.28273	Below LOD	22.7586	45.6241	0.233888	0.123377
DO2_24_232	small grain	-8.73778	0.0124898	91.5076	0.273078	-162.332	55.5222	1.97855	0.0955599	0.183953	0.000930663	0.0897988	1.01015	12.8149	0.74251	0.505592	0.0244545	0.656151	2687.62	7.58157	8.36898	2637.66	8.27814	104.672	2665.77	5.72078	54.7916	98.141		2021-09-10 10:46:26.762	2021-09-10 10:46:26.762	25.026	Below LOD	34.9716	75.9774	Below LOD	655.548	1522.54	233.359	11.3827	1.82538	2.16977	0.762649	1.27734	107.467	49.5696	45.4317	0.606605	0.259137
DO2_24_233	small grain	5.06866	0.00847579	62.0898	0.278822	279.838	103.89	1.9798	0.0954516	0.184004	0.00123758	0.0935671	1.22834	12.7942	0.742797	0.505307	0.0245043	0.423379	2687.69	10.5971	11.1794	2636.41	9.34613	104.826	2664.21	6.12934	54.7615	98.0921		2021-09-10 10:47:46.173	2021-09-10 10:47:46.173	23.649	Below LOD	42.2162	78.091	Below LOD	875.151	1512.93	226.965	13.4935	1.87688	Below LOD	0.562505	1.28903	Below LOD	25.0843	45.9292	1.58672	0.649711
DO2_24_234	small grain	2.59887	0.0197659	258.665	0.188984	543.213	123.196	2.43753	0.127331	0.187252	0.0010518	0.0754272	2.09582	10.626	0.63858	0.412248	0.0209866	0.941039	2716.9	8.57834	9.27961	2223.88	28.4999	96.1124	2488.59	15.3856	56.5399	81.8537		2021-09-10 10:49:01.522	2021-09-10 10:49:01.522	22.265	172.716	77.2177	140.62	Below LOD	1201.47	2715.22	244.636	16.3566	3.45903	139.833	47.2552	2.23019	1304.25	216.225	78.2146	27.8711	3.889
DO2_24_235	small grain	7337.07	0.0455644	328.88	0.607073	0.193924	147881	2.03709	0.100968	0.181924	0.000814021	0.244713	0.575167	12.3133	0.715836	0.491103	0.0239725	0.829439	2669.52	6.48886	7.39154	2575.3	11.2921	103.885	2628.27	6.58273	54.9246	96.4705		2021-09-10 10:50:10.736	2021-09-10 10:50:10.736	16.048	262.068	65.2331	87.9179	Below LOD	861.942	1703.36	255.723	22.8505	2.18503	13.8911	3.32171	1.44306	713.832	257.988	54.164	17.8691	4.2873
DO2_24_236	small grain	69.7989	0.0381892	285.578	0.605225	20.2929	1495.05	2.00105	0.0944726	0.184837	0.000684478	0.235338	1.50202	12.7573	0.748196	0.500768	0.0247797	0.956108	2695.81	4.99857	6.12852	2616.33	20.5631	105.556	2660.85	9.5004	54.237	97.0515		2021-09-10 10:53:37.048	2021-09-10 10:53:37.048	25.014	166.308	48.3718	94.7829	Below LOD	785.181	1892.38	219.87	10.9444	2.34464	10.7691	1.75509	1.52502	244.469	32.9328	54.8891	8.36679	1.41744
DO2_24_237	small grain	-4.61874	0.0409957	368.1	0.549052	-305.097	218.666	2.11033	0.108037	0.188251	0.00119162	0.18009	0.299058	12.3303	0.733489	0.474903	0.0235562	0.937226	2725.48	9.80742	10.4229	2504.31	20.8927	103.424	2628.01	13.4537	56.7414	91.885		2021-09-10 10:54:46.839	2021-09-10 10:54:46.839	22.671	2332.94	703.706	132.521	Below LOD	952.999	2595.16	241.223	14.8391	3.06145	10.6474	3.15255	2.14928	398.224	75.9337	74.5132	23.2969	3.84698
DO2_24_238	small grain	26.0171	0.0437918	522.716	0.706353	54.215	477.466	2.09321	0.105169	0.18757	0.000829122	0.271333	0.146438	12.3643	0.722821	0.478247	0.023515	0.890696	2719.95	6.36614	7.27756	2519.27	15.2489	102.871	2631.84	8.05759	55.5291	92.6218		2021-09-10 10:56:05.123	2021-09-10 10:56:05.123	21.145	557.6	92.8824	128.827	Below LOD	1379.83	2450.88	272.832	23.3562	3.12963	41.7759	4.36116	2.14733	1138.12	110.378	73.7494	73.8675	6.88764
DO2_24_239	small grain	-0.747264	0.0120135	83.6505	0.330282	-1898.72	91.4325	2.02812	0.0980285	0.183761	0.000934198	0.121172	0.615118	12.4801	0.724261	0.493157	0.0240012	0.427687	2685.89	7.59576	8.37574	2584.26	5.93353	103.497	2640.99	4.50485	54.3563	96.2161		2021-09-10 10:57:19.770	2021-09-10 10:57:19.770	25.015	Below LOD	40.0267	74.7386	Below LOD	582.302	1455.48	225.915	11.1764	1.81411	2.15294	0.779967	1.67477	Below LOD	18.08	42.9656	0.972668	0.281411
DO2_24_240	small grain	3.10351	0.0387428	266.901	0.524105	457.351	77.9984	1.96175	0.0967463	0.183405	0.000564171	0.19748	0.2891	12.9074	0.753354	0.51034	0.0250764	0.956661	2683.64	3.82482	5.33093	2657.65	15.2866	107.091	2672.3	7.29981	55.251	99.0318		2021-09-10 10:58:29.208	2021-09-10 10:58:29.208	25.013	Below LOD	52.6486	75.5328	Below LOD	768.677	1429.36	227.723	11.6362	1.85962	3.93681	0.797353	1.26358	411.946	83.2904	41.4905	3.18403	0.566684
DO2_24_241	small grain	-48.05	0.00441336	32.1042	0.325119	-29.5013	178.376	1.98789	0.0971026	0.184704	0.00236431	0.123817	1.74281	12.8091	0.756342	0.503362	0.0246395	0.0588306	2691.24	21.0999	21.4018	2628	11.2123	105.59	2664.28	11.2475	56.2067	97.6502		2021-09-10 10:59:38.606	2021-09-10 10:59:38.606	25.023	Below LOD	35.7114	80.7534	Below LOD	751.895	1541.9	231.149	11.9672	1.99052	1.91365	0.70581	1.27154	Below LOD	22.3174	46.7318	Below LOD	0.0883226
DO2_24_242	small grain	0.922094	0.081768	620.122	0.571985	1536.74	65.1969	2.09685	0.112878	0.184578	0.00092863	0.234773	0.298369	12.0905	0.714323	0.477834	0.0237577	0.947316	2693.37	7.52805	8.32045	2517.21	21.8591	104.847	2612.81	10.7002	52.2407	93.4595		2021-09-10 11:00:55.001	2021-09-10 11:00:55.001	17.98	406.906	97.2029	89.8425	Below LOD	1059.14	1739.97	239.631	16.219	2.19912	49.1414	6.81675	1.50768	932.133	168.376	51.0874	49.3798	7.13465
DO2_24_243	small grain	42.0167	0.00607323	43.8413	0.27592	33.7451	213.36	1.96707	0.100459	0.184378	0.00177576	0.108682	1.35286	12.9256	0.758629	0.508234	0.0249141	0.282173	2692.54	14.8504	15.232	2648.92	9.62991	106.372	2673.29	9.10894	55.4977	98.38		2021-09-10 11:02:16.690	2021-09-10 11:02:16.690	25.012	Below LOD	36.5201	86.5146	Below LOD	637.964	1681.84	226.157	13.1177	2.19742	Below LOD	0.669012	1.30889	Below LOD	16.8095	47.4514	0.210315	0.122866
DO2_24_244	small grain	0.096968	0.0726022	674.397	0.342245	14624.7	87.807	1.93357	0.096851	0.184146	0.000698246	0.146126	1.42067	13.1576	0.765559	0.517764	0.0253732	0.975802	2691.33	6.16503	7.47187	2689.27	15.2455	108.13	2690.46	7.01497	55.0904	99.9236		2021-09-10 11:03:25.963	2021-09-10 11:03:25.963	25.09	398.679	56.5123	97.7825	Below LOD	1246.23	1963.89	300.532	19.4687	2.4389	22.0689	2.58632	1.67351	1380.26	218.069	56.9148	41.9562	6.97898
DO2_24_245	small grain	16.0823	0.0176387	145.77	0.638879	88.0412	145.209	1.99021	0.0907489	0.185112	0.00104075	0.272838	1.00969	12.8459	0.750824	0.50173	0.024774	0.823129	2697.93	8.57494	9.27465	2620.71	17.8834	106.952	2667.88	7.22711	55.516	97.1379		2021-09-10 11:04:47.464	2021-09-10 11:04:47.464	22.36	209.25	54.1315	90.5279	Below LOD	938.283	1740.27	235.935	15.6993	2.19546	8.2001	1.58972	1.42947	283.583	134.709	52.421	9.38572	1.22414
DO2_24_246	small grain	-35.0894	0.0116033	74.0932	0.250825	-40.3561	146.787	1.90325	0.101879	0.185264	0.00116383	0.107351	2.41752	13.4544	0.790307	0.526272	0.0261015	0.958108	2699.06	9.71648	10.3361	2725.14	18.1391	111.306	2711.38	7.84275	55.0807	100.966		2021-09-10 11:07:12.934	2021-09-10 11:07:12.934	25.014	Below LOD	37.1343	71.5841	Below LOD	726.977	1425.02	215.81	10.9701	1.76958	1.5657	0.840256	1.15562	Below LOD	18.9177	39.3684	0.129203	0.0818099
DO2_24_247	small grain	-0.162749	0.043112	310.55	0.131503	-8711.18	99.3002	1.95427	0.104659	0.18426	0.00116335	0.0652684	0.716505	13.0025	0.757071	0.511507	0.0250559	0.626582	2690.43	9.76391	10.3797	2663.04	3.90764	106.828	2679.57	6.54676	54.5993	98.9822		2021-09-10 11:08:24.752	2021-09-10 11:08:24.752	13.461	100.851	82.358	82.7875	Below LOD	955.063	1629.38	221.287	32.0102	2.00766	10.857	6.5517	1.37205	191.376	103.631	45.5224	1.95499	0.892935
DO2_24_248	small grain	7.70391	0.0055273	44.4106	0.249848	182.837	124.749	2.11478	0.106632	0.188646	0.00170175	0.119485	1.34314	12.381	0.760868	0.475557	0.0244025	0.908953	2727.94	14.451	14.8766	2505.96	32.4749	106.202	2629.62	18.7826	57.012	91.8626		2021-09-10 11:09:45.415	2021-09-10 11:09:45.415	25.065	531.708	67.5727	76.7704	Below LOD	784.474	1549.54	230.406	14.7509	1.92122	4.44955	0.902007	1.27078	186.022	46.3957	44.6772	10.8006	1.23966
DO2_24_249	small grain	23.0475	0.041221	311.652	0.311656	61.5277	646.912	1.85171	0.0934496	0.184164	0.00061433	0.132399	0.869871	13.7397	0.81209	0.541343	0.0270482	0.967509	2689.84	4.22445	5.51121	2788.12	22.819	113.295	2730.8	9.93407	56.3398	103.654		2021-09-10 11:11:04.137	2021-09-10 11:11:04.137	25.004	90.2539	45.6261	83.9587	Below LOD	754.473	1650.57	215.179	14.5627	2.05537	5.08215	1.28683	1.35374	78.2071	30.0222	46.3871	4.76248	0.824851
DO2_24_250	small grain	-3.47534	0.0286436	198.323	0.401652	-408.541	134.932	1.90601	0.0938395	0.183194	0.000612427	0.175147	1.72502	13.2638	0.774164	0.5249	0.0257706	0.84933	2681.11	4.25195	5.53853	2719.75	9.86446	108.987	2698.34	4.83797	55.103	101.441		2021-09-10 11:12:22.658	2021-09-10 11:12:22.658	25.042	Below LOD	33.0504	76.4999	Below LOD	606.627	1508.66	227.185	15.8982	1.89404	3.92237	0.914906	1.39715	Below LOD	20.0428	41.6888	2.86833	0.801926
DO2_24_251	small grain	-4.04021	0.0335801	427.097	0.633736	-352.988	196.367	3.04948	0.203713	0.179963	0.000910662	0.250222	0.835374	8.46718	0.596252	0.340596	0.0216623	0.990531	2651.36	7.5844	8.3716	1882.05	67.4758	104.516	2267.88	37.6291	65.7792	70.9844		2021-09-10 11:13:31.545	2021-09-10 11:13:31.545	22.666	1691.34	141.133	101.156	Below LOD	1000.69	1998.35	275.743	12.7439	2.43676	53.1582	6.17413	1.63539	1238.2	98.5794	58.2187	76.2202	7.9152
DO2_24_252	small grain	44.0874	0.00316978	28.102	0.242082	32.1966	85.9234	2.23798	0.110399	0.184133	0.0030993	0.110682	2.42577	11.3357	0.683122	0.447396	0.0220853	0.234745	2683.34	28.0533	28.2833	2383.28	14.6024	98.3135	2550.75	15.1565	54.6116	88.8176		2021-09-10 11:14:46.260	2021-09-10 11:14:46.260	25.011	324.821	57.3156	78.7601	Below LOD	879.643	1557.28	231.155	13.7902	1.9674	3.01449	0.935588	1.31979	124.085	34.2394	45.2804	1.65737	0.354348
DO2_24_253	small grain	0.925299	0.0480473	1087.3	0.604313	1561.13	48.0648	3.20679	0.167702	0.172409	0.00126677	0.300239	0.284737	7.46783	0.478731	0.313912	0.0169548	0.972871	2579.83	11.6786	12.2092	1758.68	36.2342	82.7722	2165.52	24.2721	55.9771	68.1703		2021-09-10 11:16:09.240	2021-09-10 11:16:09.240	13.247	2376.83	290.376	178.804	Below LOD	1976.14	3638.21	406.314	33.0282	4.55186	107.526	11.8757	2.88818	3387.98	549.408	101.573	162.09	17.0321
DO2_24_254	small grain	44.802	0.00565382	47.0825	0.180828	31.5865	142.106	1.93941	0.0955842	0.185639	0.00159773	0.0819255	1.98544	13.198	0.773332	0.515964	0.025335	0.295958	2703.88	14.455	14.9247	2681.79	11.6785	107.781	2693.01	8.85261	55.4911	99.1833		2021-09-10 11:17:14.443	2021-09-10 11:17:14.443	25.035	301.235	63.8362	92.3971	Below LOD	832.078	1772.47	228.507	17.3899	2.29568	2.11315	0.771058	1.55625	Below LOD	22.9913	54.1694	1.43735	0.512307
DO2_24_255	small grain	0.337787	0.0365149	263.128	0.514249	4207.12	107.352	1.90359	0.0935178	0.182699	0.000771609	0.210043	0.155309	13.2466	0.779645	0.525902	0.0260607	0.936568	2676.59	6.03167	6.99883	2723.74	18.9117	109.921	2696.71	9.44671	55.3619	101.762		2021-09-10 11:18:17.077	2021-09-10 11:18:17.077	16.403	Below LOD	65.6105	107.646	Below LOD	974.9	2028.15	251.498	20.8053	2.63883	3.96048	1.37914	1.90904	Below LOD	25.1317	64.3877	2.79746	0.583868
[truncated: 120 more columns]

## Sheet: S4
	Table S4: Data processing and analytical parameters
	Analytical parameters (geochronology)
	Laboratory & Sample Preparation
	Laboratory name	MERC IGL
	Sample type/mineral	Zircon
	Analysis	U-Pb
	Sample preparation	polished mount
	Reference material location	Separate mount
	Imaging	CL
	Laser ablation system
	Make, Model & type	Photon Machines, Analyte G2
	Ablation cell & volume	Helex II, large format, two volume
	Laser wavelength (nm)	193
	Pulse width (ns)	<4
	Fluence (J.cm-2)	2
	Repetition rate (Hz)	7
	Ablation duration (secs)	30
	Ablation pit depth / ablation rate	~15 um/ ~0.5 um/sec
	Spot size (um)	25
	Sampling mode / pattern	spot
	Carrier gas	He & Ar (after cell) & N2 (after cell)
	Cell carrier gas flow (l/min)	He1 (cup) = 0.525-0.55, He2 (cell) = 0.10, Ar = 1.68, N2 = 0.015
	ICP-MS Instrument
	Make, Model & type	Thermo Neptune Plus with Jet Interface
	Sample introduction	Laser Ablation
	RF power (W)	1200
	Make-up gas flow (l/min)	0.07
	Detection system	9 Faraday Cups
	Masses measured	204, 206, 207, 208, 232, 238
	Integration time per peak/dwell times (ms)	NA
	Total integration time per output datapoint (secs)	0.25
	'Sensitivity' as useful yield (%, element)
	IC Dead time (ns)	NA
	Data Processing
	Gas blank	Measured for 90 sec at beginning and end of run & 30 sec between ablations
	Calibration strategy	Standard Sample bracketing
	Reference Material info	Primary RM = OG1 (3465.4 ± 0.6 Ma; Stern et al., 2009), Secondary RMs = DM18-1 (2682 ± 1 Ma; Davis (2002)), and Maniitsoq (Grn; 3008.7 ± 0.72 Ma; Marsh et al., In Prep))
	Data processing package used / Correction for LIEF	Iolite v. 4; DRS = U-Pb Geochron
	Mass discrimination
	Common-Pb correction, composition and uncertainty	NA
	Uncertainty level & propagation	Spots = 2SE, Wtd. Means = 2 SD with propagation of in-run variance in primary RM
	Quality control / Validation	DM18-1 = 2678 ± 7 Ma; Grn = 3011 ± 5 Ma (207Pb/206Pb Wtd. Means; n = 10)
	Analytical parameters (trace elements)
	Laboratory & Sample Preparation
	Laboratory name	MERC IGL
	Sample type/mineral	Zircon
	Sample preparation	polished mount
	Reference material location	Separate mount
	Imaging	CL
	Laser ablation system
	Make, Model & type	Photon Machines, Analyte G2
	Ablation cell & volume	Helex II, large format, two volume
	Laser wavelength (nm)	193
	Pulse width (ns)	<4
	Fluence (J.cm-2)	2
	Repetition rate (Hz)	7
	Ablation duration (secs)	30
	Ablation pit depth / ablation rate	~15 um/ ~0.5 um/sec
	Spot size (um)	25
	Sampling mode / pattern	spot
	Carrier gas	He & Ar (after cell) & N2 (after cell)
	Cell carrier gas flow (l/min)	He1 (cup) = 0.525-0.55, He2 (cell) = 0.10, Ar = 1.28, N2 = 0.015
	ICP-MS Instrument
	Make, Model & type	Thermo iCap-TQ
	Sample introduction	Laser Ablation
	RF power (W)	1550
	Make-up gas flow (l/min)	0
	Detection system	IC
	Masses measured	31P, 43Ca, 45Sc, 49Ti, 57Fe, 88Sr, 89Y, 91Zr, 93Nb, 139La, 140Ce, 141Pr, 146Nd, 147Sm, 153Eu, 157Gd, 159Tb, 163Dy, 165Ho, 166Er, 169Tm, 172Yb, 175Lu, 177Hf, 181Ta, 204Pb, 207Pb, 208Pb, 232Th, 238U
	Integration time per peak/dwell times (ms)	0.005 ms (Si, Ca, Fe, Sr, Zr, Hf), 0.01 ms (P, Sc, Y. Nb, Ce, Dy, Ho, Er, Tm, Yb. Lu, Ta), 0.015 ms (Gd, Tb), 0.025 (Nd, Sm, Eu), 0.04 (Pr), Ti (0.1), La (0.14)
	Total integration time per output datapoint (secs)	0.5
	'Sensitivity' as useful yield (%, element)
	IC Dead time (ns)	NA
	Data Processing
	Gas blank	Measured for 60 sec at beginning and end of run & 30 sec between ablations
	Calibration strategy	Standard Sample bracketing
	Reference Material info (TE)	Primary RM = NIST610 (~450 ppm trace elements), Secondary RMs = NIST612 (~38 ppm trace elements)
	Data processing package used	Iolite v. 4; TE DRS = Trace Element (Internal Standard (Si))
	Mass discrimination
	Common-Pb correction, composition and uncertainty	NA
	Uncertainty level & propagation	Spots = 2SE, Wtd. Means = 2 SD
	Quality control / Validation	NIST612 = 0.02 to 0.1 % difference from published (abs. value), except for Fe (2.2 % difference)
